# Supplementary material
Source: publisher figshare collection journal article supplement (https://gsajournals.figshare.com/articles/dataset/_/14058293)
Supplement: Supplementary file 1 [file 1]

## Sheet: Sheet1
source	term_name	term_id	adjusted_p_value	negative_log10_of_adjusted_p_value	term_size	query_size	intersection_size	effective_domain_size	intersections
GO:MF	binding	GO:0005488	5.00524e-62	61.3006	12082	4510	3788	16109	KITLG,RIDA,CXCL10,CCT8,ARL13B,ATP6V1A,RABL3,XXYLT1,CLDN1,MASP1,ADIPOQ,DCUN1D1,ZMAT3,NCEH1,PHC3,TTC3,RAPGEF4,PPIG,ORC4,CXCR4,DPP10,ENSCHIG00000020570,ORC2,NBEAL1,ABI2,ENSCHIG00000017628,IKZF2,EPHA4,KHDRBS1,SNRNP40,TRIM63,MREG,IQGAP3,SYT11,PGLYRP3,ECM1,ANP32E,HAO2,CD53,PSRC1,RNPC3,DR1,ENSCHIG00000013246,KANK4,NFIA,DHCR24,TUT4,TM2D1,FIGNL1,MEOX2,NAPEPLD,HBP1,FKBP14,MPP6,POT1,LRRC4,KLHDC10,ANO6,PRICK…
GO:MF	protein binding	GO:0005515	2.36946e-46	45.6254	6939	4510	2358	16109	KITLG,CXCL10,CCT8,RABL3,CLDN1,MASP1,ADIPOQ,DCUN1D1,PHC3,TTC3,RAPGEF4,CXCR4,DPP10,NBEAL1,ABI2,IKZF2,EPHA4,KHDRBS1,SNRNP40,TRIM63,IQGAP3,SYT11,PGLYRP3,ECM1,ANP32E,CD53,PSRC1,RNPC3,DR1,KANK4,NFIA,DHCR24,NAPEPLD,HBP1,MPP6,POT1,LRRC4,KLHDC10,ANO6,CNOT2,USP15,NTN4,GAS2L3,IGF1,NUAK1,YARS2,ABCC9,KLRK1,GABARAPL1,BBS7,NDNF,SYNPO2,LEF1,SLC9B2,LAMTOR3,RAP1GDS1,ARAP2,SLC4A4,ENSCHIG00000026790,PFDN1,NR3C1,JAKM…
GO:MF	ion binding	GO:0043167	1.32447e-24	23.878	4925	4510	1664	16109	CXCL10,CCT8,ARL13B,ATP6V1A,RABL3,XXYLT1,MASP1,ADIPOQ,ZMAT3,NCEH1,PHC3,TTC3,RAPGEF4,ENSCHIG00000020570,ENSCHIG00000017628,EPHA4,TRIM63,MREG,PGLYRP3,HAO2,ENSCHIG00000013246,DHCR24,TUT4,FIGNL1,NAPEPLD,FKBP14,PRICKLE1,NUAK1,YARS2,ABCC9,NDNF,TBCK,PPM1K,ARAP2,THAP9,MAPK10,NR3C1,SLU7,HMMR,PPIP5K2,GALNTL6,EBF2,IARS1,ASPN,ENSCHIG00000010087,CLVS2,TUBE1,CDK19,AFG1L,ENSCHIG00000017313,PDE7B,NT5E,CDH24,UBR1,…
GO:MF	enzyme binding	GO:0019899	2.25909e-16	15.6461	1508	4510	573	16109	RAPGEF4,CXCR4,EPHA4,KHDRBS1,IQGAP3,SYT11,ECM1,DHCR24,POT1,GABARAPL1,LEF1,LAMTOR3,NR3C1,JAKMIP2,STX17,XPO7,IARS1,HACD3,DAAM1,SOCS5,CEP68,SPART,ITCH,PKIA,YOD1,CNST,ATP1B1,RFC5,GARRE1,MYOCD,ANKRA2,PIK3R1,GOLGA5,ELP2,RRN3,RNF40,KIF11,LCOR,MIER1,CFTR,CAMLG,APC,CD247,CACUL1,EXOC2,RNF152,RNF125,RABGEF1,SFPQ,RAB11FIP2,GOLGA7B,IKBKB,POLB,RIN1,SVIP,ITSN1,DOCK7,GLMN,HACD2,FNBP1L,F3,PRKAG2,RAPGEF5,SP1,PPP1R1…
GO:MF	transferase activity	GO:0016740	1.41262e-14	13.85	1976	4510	713	16109	XXYLT1,TTC3,EPHA4,DHDDS,ENSCHIG00000013246,TUT4,TWISTNB,NUAK1,TBCK,TRMT10A,SULT1B1,MAPK10,ENSCHIG00000003874,PPIP5K2,GALNTL6,CDK19,UBR1,PIP4K2A,EPC1,ITCH,TGM2,RRP8,TRIM21,GLYATL2,CDC42BPA,NMNAT2,PIGW,NMT1,ST8SIA2,SRPK1,GSTA4,RNF40,PRKG1,TRIM25,RFK,UBR3,TPMT,DDR1,NAA50,ESCO1,RNF152,RNF125,SMG1,EEF2K,RABGEF1,ATE1,ENSCHIG00000014280,RNF170,IKBKB,POLB,SAMD8,KMT5B,FBXO40,SCP2,HIPK1,TENT5C,BRAF,ZNRF2,N…
GO:MF	RNA polymerase II transcription regulatory region sequence-specific DNA binding	GO:0000977	9.09306e-14	13.0413	564	4510	247	16109	NFIA,MEOX2,LEF1,KLF3,NR3C1,ZBTB5,EBF2,TBPL1,NCOA2,EHF,MITF,ONECUT2,FOXF2,SFPQ,PURG,ETS1,ARNT,PBX1,NHLH2,SP1,NFYB,ATF4,RBPJ,PURA,ENSCHIG00000018293,SATB1,KAT2B,HIF1A,GTF2A1,MEIS2,BCL11A,NACC2,DACH1,KLF10,YAP1,SALL1,NFATC3,VEZF1,DLX4,CREBRF,PAX9,ARID3B,NR2C2,ZNF148,ATF2,CARF,GMEB1,CEBPZ,MEIS1,DNMT3A,SNAI2,HOXB9,FOXP1,JARID2,SMAD4,TCF7L2,EBF3,FLI1,TFE3,BACH1,NSD1,OTX2,KCNIP3,PAX8,MXD1,CDK9,CREM,HNRN…
GO:MF	transcription regulatory region sequence-specific DNA binding	GO:0000976	2.01447e-13	12.6958	656	4510	278	16109	NFIA,MEOX2,LEF1,KLF3,NR3C1,ZBTB5,EBF2,TBPL1,NCOA2,EHF,MITF,ONECUT2,RRN3,FOXF2,SFPQ,PURG,ETS1,ARNT,PBX1,NHLH2,SP1,NFYB,ATF4,RBPJ,PURA,ENSCHIG00000018293,SATB1,KAT2B,HIF1A,GTF2A1,MEIS2,BCL11A,NACC2,DACH1,KLF10,ZNF704,AGO2,YAP1,SALL1,NFATC3,VEZF1,DLX4,CREBRF,PAX9,ARID3B,NR2C2,ZNF148,ATF2,CARF,GMEB1,SOX5,RFX3,CEBPZ,MEIS1,DNMT3A,SNAI2,HOXB9,FOXP1,JARID2,SMAD4,ZNF516,TCF7L2,EBF3,ASH2L,FLI1,TFE3,E2F7,BA…
GO:MF	regulatory region nucleic acid binding	GO:0001067	2.01447e-13	12.6958	656	4510	278	16109	NFIA,MEOX2,LEF1,KLF3,NR3C1,ZBTB5,EBF2,TBPL1,NCOA2,EHF,MITF,ONECUT2,RRN3,FOXF2,SFPQ,PURG,ETS1,ARNT,PBX1,NHLH2,SP1,NFYB,ATF4,RBPJ,PURA,ENSCHIG00000018293,SATB1,KAT2B,HIF1A,GTF2A1,MEIS2,BCL11A,NACC2,DACH1,KLF10,ZNF704,AGO2,YAP1,SALL1,NFATC3,VEZF1,DLX4,CREBRF,PAX9,ARID3B,NR2C2,ZNF148,ATF2,CARF,GMEB1,SOX5,RFX3,CEBPZ,MEIS1,DNMT3A,SNAI2,HOXB9,FOXP1,JARID2,SMAD4,ZNF516,TCF7L2,EBF3,ASH2L,FLI1,TFE3,E2F7,BA…
GO:MF	double-stranded DNA binding	GO:0003690	2.34608e-12	11.6297	898	4510	356	16109	ORC4,ORC2,NFIA,MEOX2,LEF1,KLF3,NR3C1,ZBTB5,EBF2,TBPL1,NCOA2,HEY1,EHF,ZFP1,ZNF445,MITF,ONECUT2,RRN3,MBNL2,PPARD,FOXF2,SFPQ,PURG,ETS1,ARNT,PBX1,LHX8,NHLH2,SP1,ZNF740,NFYB,ATF4,RBPJ,PURA,XPA,PCBP3,ENSCHIG00000018293,SATB1,KAT2B,HIF1A,GTF2A1,MEIS2,PAX7,AFF3,BCL11A,NACC2,ZIC5,DACH1,KLF10,ZNF704,AGO2,YAP1,LHX9,KDM5B,SALL1,NFATC3,VEZF1,DLX4,CREBRF,PAX9,ARID3B,NR2C2,ZNF148,ATF2,CARF,GMEB1,SOX5,HMBOX1,RFX…
GO:MF	metal ion binding	GO:0046872	2.43712e-12	11.6131	2974	4510	1006	16109	XXYLT1,MASP1,ZMAT3,PHC3,TTC3,ENSCHIG00000020570,ENSCHIG00000017628,TRIM63,PGLYRP3,ENSCHIG00000013246,TUT4,NAPEPLD,FKBP14,PRICKLE1,PPM1K,THAP9,NR3C1,SLU7,GALNTL6,EBF2,ASPN,PDE7B,NT5E,CDH24,UBR1,SORD,DDHD1,TGM2,MMP7,TIMM8B,SC5D,TRIM21,YOD1,CDC42BPA,EXO1,ATP1B1,ENSCHIG00000020210,ZFP1,CYB5B,ZFP30,ENSCHIG00000017808,MBTD1,ENDOV,ADAMTS12,ZNF445,SRPK1,ZKSCAN2,RNF40,SEC23IP,PDLIM3,ENSCHIG00000000097,TRI…
GO:MF	cation binding	GO:0043169	2.77144e-12	11.5573	3025	4510	1021	16109	XXYLT1,MASP1,ZMAT3,PHC3,TTC3,ENSCHIG00000020570,ENSCHIG00000017628,TRIM63,PGLYRP3,ENSCHIG00000013246,TUT4,NAPEPLD,FKBP14,PRICKLE1,YARS2,PPM1K,THAP9,NR3C1,SLU7,GALNTL6,EBF2,ASPN,PDE7B,NT5E,CDH24,UBR1,SORD,DDHD1,TGM2,MMP7,TIMM8B,SC5D,TRIM21,YOD1,CDC42BPA,EXO1,ATP1B1,ENSCHIG00000020210,ZFP1,CYB5B,ZFP30,ENSCHIG00000017808,CHRNB1,MBTD1,ENDOV,ADAMTS12,ZNF445,SRPK1,ZKSCAN2,RNF40,SEC23IP,PDLIM3,ENSCHIG00…
GO:MF	cis-regulatory region sequence-specific DNA binding	GO:0000987	3.8168e-12	11.4183	471	4510	209	16109	NFIA,MEOX2,LEF1,NR3C1,EBF2,TBPL1,NCOA2,EHF,MITF,ONECUT2,SFPQ,ETS1,ARNT,NHLH2,SP1,NFYB,ATF4,RBPJ,ENSCHIG00000018293,HIF1A,MEIS2,BCL11A,NACC2,DACH1,KLF10,ZNF704,YAP1,SALL1,NFATC3,DLX4,ARID3B,NR2C2,ZNF148,ATF2,CARF,GMEB1,CEBPZ,MEIS1,DNMT3A,SNAI2,FOXP1,SMAD4,ZNF516,TCF7L2,EBF3,FLI1,TFE3,E2F7,BACH1,NSD1,OTX2,KCNIP3,PAX8,MXD1,CDK9,HNRNPU,ZNF281,SATB2,NLRC5,NFAT5,FOSB,NR4A2,SOX9,RAI1,SP2,KLF13,BCL6,NEUR…
GO:MF	sequence-specific double-stranded DNA binding	GO:1990837	6.0898e-12	11.2154	852	4510	339	16109	ORC4,ORC2,NFIA,MEOX2,LEF1,KLF3,NR3C1,ZBTB5,EBF2,TBPL1,NCOA2,HEY1,EHF,ZFP1,MITF,ONECUT2,RRN3,MBNL2,PPARD,FOXF2,SFPQ,PURG,ETS1,ARNT,PBX1,LHX8,NHLH2,SP1,ZNF740,NFYB,ATF4,RBPJ,PURA,XPA,ENSCHIG00000018293,SATB1,KAT2B,HIF1A,GTF2A1,MEIS2,PAX7,BCL11A,NACC2,ZIC5,DACH1,KLF10,ZNF704,AGO2,YAP1,LHX9,KDM5B,SALL1,NFATC3,VEZF1,DLX4,CREBRF,PAX9,ARID3B,NR2C2,ZNF148,ATF2,CARF,GMEB1,SOX5,HMBOX1,RFX3,CEBPZ,MEIS1,DNMT…
GO:MF	anion binding	GO:0043168	1.3951e-11	10.8554	2417	4510	832	16109	CXCL10,CCT8,ARL13B,ATP6V1A,RABL3,ADIPOQ,NCEH1,RAPGEF4,ENSCHIG00000020570,EPHA4,MREG,HAO2,DHCR24,FIGNL1,NUAK1,YARS2,ABCC9,NDNF,TBCK,ARAP2,MAPK10,HMMR,PPIP5K2,IARS1,ENSCHIG00000010087,CLVS2,TUBE1,CDK19,AFG1L,ENSCHIG00000017313,UBR1,ENSCHIG00000027081,ARL5B,PIP4K2A,CDC42BPA,ATP1B1,FMO2,RFC5,SNX20,CHD9,MTRR,SRPK1,TBCC,APOM,RAB27B,PRKG1,KIF20B,KIF11,ENSCHIG00000000097,CFTR,RFK,SRXN1,TTLL6,SNX18,HCN1,P…
GO:MF	RNA polymerase II cis-regulatory region sequence-specific DNA binding	GO:0000978	1.84653e-11	10.7336	446	4510	198	16109	NFIA,MEOX2,LEF1,NR3C1,EBF2,TBPL1,NCOA2,EHF,MITF,ONECUT2,SFPQ,ETS1,ARNT,NHLH2,SP1,NFYB,ATF4,RBPJ,ENSCHIG00000018293,HIF1A,MEIS2,BCL11A,NACC2,DACH1,KLF10,YAP1,SALL1,NFATC3,DLX4,ARID3B,NR2C2,ZNF148,ATF2,CARF,GMEB1,CEBPZ,MEIS1,DNMT3A,SNAI2,FOXP1,SMAD4,TCF7L2,EBF3,FLI1,TFE3,BACH1,NSD1,OTX2,KCNIP3,PAX8,MXD1,CDK9,HNRNPU,ZNF281,SATB2,NLRC5,NFAT5,FOSB,NR4A2,SOX9,SP2,KLF13,BCL6,NEUROD1,KLF7,CREB1,NR2C1,RFX…
GO:MF	catalytic activity, acting on a protein	GO:0140096	4.61263e-11	10.3361	1930	4510	679	16109	MASP1,TTC3,PPIG,DPP10,EPHA4,RHBDD1,ENSCHIG00000013246,FKBP14,USP15,NUAK1,TBCK,PPM1K,MAPK10,GALNTL6,ADAMTSL1,CDC14C,CDK19,PPIL4,DPP8,UBR1,OTUD1,ITCH,TGM2,MMP7,TRIM21,YOD1,CDC42BPA,GZMA,ADAMTS12,SRPK1,RNF40,PRKG1,ENSCHIG00000006638,TRIM25,MIER1,HGF,UBR3,TTLL6,DDR1,FKBP5,RNF152,RNF125,SMG1,EEF2K,RABGEF1,MMP25,ATE1,IDE,RNF170,IKBKB,SPCS3,DUSP4,KMT5B,FBXO40,USP1,F3,CDC14A,HIPK1,BRAF,ZNRF2,DUSP6,SCYL2,…
GO:MF	sequence-specific DNA binding	GO:0043565	1.31094e-10	9.88242	1006	4510	384	16109	ORC4,ORC2,NFIA,MEOX2,POT1,LEF1,KLF3,THAP9,NR3C1,ZBTB5,EBF2,TBPL1,NCOA2,HEY1,EHF,ZFP1,MITF,ONECUT2,RRN3,MBNL2,PPARD,FOXF2,FBXL19,SMG1,SFPQ,PURG,ETS1,ARNT,PBX1,LHX8,NHLH2,GATAD1,SP1,ZNF740,NFYB,ATF4,RBPJ,PURA,GATAD2A,XPA,NR4A3,ENSCHIG00000018293,SATB1,KAT2B,HIF1A,GTF2A1,MEIS2,PAX7,BCL11A,NACC2,ZIC5,DACH1,KLF10,ZNF704,AGO2,YAP1,PRDM16,LHX9,KDM5B,SALL1,NFATC3,VEZF1,DLX4,CREBRF,TP53BP1,PAX9,ARID3B,NR2…
GO:MF	phosphotransferase activity, alcohol group as acceptor	GO:0016773	7.59088e-09	8.11971	659	4510	262	16109	EPHA4,NUAK1,TBCK,MAPK10,CDK19,PIP4K2A,CDC42BPA,SRPK1,PRKG1,RFK,DDR1,SMG1,EEF2K,IKBKB,HIPK1,BRAF,SCYL2,STK38L,BMP2K,DYRK1A,FYN,TYRO3,MERTK,AAK1,PAN3,ENSCHIG00000021932,LYN,WEE1,PIK3C2B,CDK18,DYRK3,MARK1,GALK1,MMD,TLK1,ULK2,ERN1,MAST4,SNRK,TGFBR2,UHMK1,DGKB,MET,TEC,CDK20,HIPK3,AXL,DGKE,STRADA,MAP3K1,CDK17,BMPR1B,PIKFYVE,CASK,PKLR,MAPK3,IPMK,CHKA,TESK2,CDKL5,MAPK1,ENSCHIG00000000233,TGFBR3,SRPK2,CDK…
GO:MF	ubiquitin-like protein transferase activity	GO:0019787	8.40127e-09	8.07566	271	4510	127	16109	TTC3,UBR1,ITCH,TRIM21,RNF40,TRIM25,UBR3,RNF152,RNF125,RABGEF1,RNF170,FBXO40,ZNRF2,TMEM129,PJA2,JADE2,UBE2J1,BIRC6,UBR5,CBL,RC3H1,RNF10,UBE3A,ANKIB1,RNF38,TRIM36,RNF111,UBE4A,DTL,RNF185,G2E3,KCTD13,TRIM72,UBR2,MYLIP,NEDD4L,ENSCHIG00000014561,MEX3C,RNF138,ENSCHIG00000016249,PIAS3,HECW1,UBE2D2,HACE1,ARIH1,RNF19A,RNF13,ASB4,MARCHF1,RCHY1,RNF217,UFL1,PELI1,UBE4B,KLHL20,KLHL42,RBBP6,CBLB,RNF144B,MIB1,H…
GO:MF	ubiquitin-protein transferase activity	GO:0004842	2.33924e-08	7.63093	258	4510	121	16109	TTC3,UBR1,ITCH,TRIM21,RNF40,TRIM25,UBR3,RNF152,RNF125,RABGEF1,RNF170,FBXO40,ZNRF2,TMEM129,PJA2,JADE2,UBE2J1,BIRC6,UBR5,CBL,RC3H1,RNF10,UBE3A,ANKIB1,RNF38,TRIM36,RNF111,UBE4A,DTL,RNF185,G2E3,KCTD13,TRIM72,UBR2,MYLIP,NEDD4L,MEX3C,RNF138,ENSCHIG00000016249,HECW1,UBE2D2,HACE1,ARIH1,RNF19A,RNF13,ASB4,MARCHF1,RCHY1,RNF217,PELI1,UBE4B,KLHL20,KLHL42,RBBP6,CBLB,RNF144B,MIB1,HECTD2,RNF11,TRIM24,UHRF1,RNF13…
GO:MF	molecular function regulator	GO:0098772	6.59613e-08	7.18071	2398	4510	801	16109	KITLG,CXCL10,ADIPOQ,RAPGEF4,ANP32E,DR1,NFIA,MEOX2,POT1,IGF1,LEF1,LAMTOR3,RAP1GDS1,ARAP2,ARHGAP24,TNFAIP8,NR3C1,GM2A,ZBTB5,EBF2,NCOA7,TBPL1,FGF7,PPP2R5E,ENSCHIG00000024446,NCOA2,PKIA,HEY1,EHF,AHCTF1,ATP1B1,PDGFC,GTF2H3,CCL17,RAP1GAP2,MYOCD,CARTPT,ZNF445,MITF,BMP5,ENSCHIG00000008358,ONECUT2,ZKSCAN2,PRKG1,LCOR,HGF,CFTR,SLC30A9,GNRH1,APC,TEAD1,LYPD1,RASAL2,SFRP2,MRTFB,RYBP,ZKSCAN4,PPARD,FOXF2,ENSCHIG…
GO:MF	DNA binding	GO:0003677	6.85074e-08	7.16426	1670	4510	579	16109	PHC3,ORC4,ORC2,DR1,NFIA,MEOX2,HBP1,POT1,LEF1,KLF3,THAP9,NR3C1,ZBTB5,EBF2,TBPL1,BCLAF1,TTC5,ENSCHIG00000027081,ADNP,NCOA2,HEY1,EHF,EXO1,RFC5,ZFP1,ENSCHIG00000021323,ATXN1L,ENDOV,ZNF445,MITF,ONECUT2,RRN3,LCOR,SPTY2D1,MIER1,MBNL2,TEAD1,H1-6,RYBP,ZKSCAN4,H1-3,ATXN1,PPARD,FOXF2,FBXL19,ENSCHIG00000009137,SMG1,RABGEF1,MEIOB,SFPQ,PURG,POLB,ARID4B,ETS1,ARNT,PBX1,LHX8,NHLH2,DMTF1,GATAD1,SP1,ZNF740,NFYB,ATF…
GO:MF	DNA-binding transcription factor activity, RNA polymerase II-specific	GO:0000981	8.24177e-08	7.08398	654	4510	256	16109	NFIA,MEOX2,LEF1,NR3C1,ZBTB5,EBF2,TBPL1,HEY1,EHF,MITF,ONECUT2,PPARD,FOXF2,ETS1,ARNT,PBX1,LHX8,NHLH2,SP1,NFYB,ATF4,RBPJ,NR4A3,PCBP3,ENSCHIG00000018293,SATB1,HIF1A,MEIS2,PAX7,BCL11A,NACC2,DACH1,KLF10,LHX9,SALL1,NFATC3,VEZF1,DLX4,CREBRF,PAX9,ARID3B,NR2C2,ZNF148,ATF2,CARF,GMEB1,HMBOX1,CEBPZ,MEIS1,SNAI2,HOXB9,FOXP1,ZNF24,EMX2,RARB,THRB,JARID2,SMAD4,EBF3,HMX2,FLI1,TFE3,HOXA3,BACH1,MYT1L,OTX2,KCNIP3,MXD1…
GO:MF	DNA-binding transcription activator activity	GO:0001216	1.07851e-07	6.96718	361	4510	156	16109	NFIA,MEOX2,LEF1,NR3C1,EBF2,TBPL1,EHF,MITF,ONECUT2,FOXF2,ETS1,NHLH2,SP1,NFYB,ATF4,RBPJ,NR4A3,ENSCHIG00000018293,HIF1A,MEIS2,KLF10,NFATC3,VEZF1,CREBRF,PAX9,ARID3B,NR2C2,ATF2,CARF,GMEB1,CEBPZ,MEIS1,E2F5,ZNF24,SMAD4,EBF3,FLI1,TFE3,BACH1,OTX2,SATB2,NFAT5,ZEB2,FOSB,NR4A2,SOX9,KLF13,TP63,NEUROD1,CSRNP3,KLF7,CREB1,RFX4,NFIB,ZNF143,PAX6,SRF,CDC5L,SMAD3,ELK4,FOXC1,RREB1,SOX4,GTF2I,MTF1,HOXC4,TFDP2,EGR1,TCF…
GO:MF	transcription regulator activity	GO:0140110	1.31483e-07	6.88113	1172	4510	422	16109	DR1,NFIA,MEOX2,LEF1,NR3C1,ZBTB5,EBF2,NCOA7,TBPL1,NCOA2,HEY1,EHF,AHCTF1,GTF2H3,MYOCD,ZNF445,MITF,ONECUT2,ZKSCAN2,LCOR,SLC30A9,TEAD1,MRTFB,RYBP,ZKSCAN4,PPARD,FOXF2,ENSCHIG00000009137,ETS1,ARNT,PBX1,LHX8,NHLH2,ENSCHIG00000019440,SP1,NFYB,ATF4,RBPJ,PURA,NR4A3,PCBP3,ZNF367,PHF2,ENSCHIG00000018293,SATB1,KAT2B,HIF1A,JMY,GTF2A1,MEIS2,PAX7,BCL11A,NACC2,DACH1,MTDH,KLF10,NPAT,YAP1,PRDM16,LHX9,KDM5B,SALL1,NF…
GO:MF	DNA-binding transcription activator activity, RNA polymerase II-specific	GO:0001228	2.08741e-07	6.68039	358	4510	154	16109	NFIA,MEOX2,LEF1,NR3C1,EBF2,TBPL1,EHF,MITF,ONECUT2,FOXF2,ETS1,NHLH2,SP1,NFYB,ATF4,RBPJ,NR4A3,ENSCHIG00000018293,HIF1A,MEIS2,KLF10,NFATC3,VEZF1,CREBRF,PAX9,ARID3B,NR2C2,ATF2,CARF,GMEB1,CEBPZ,MEIS1,ZNF24,SMAD4,EBF3,FLI1,TFE3,BACH1,OTX2,SATB2,NFAT5,ZEB2,FOSB,NR4A2,SOX9,KLF13,TP63,NEUROD1,CSRNP3,KLF7,CREB1,RFX4,NFIB,ZNF143,PAX6,SRF,CDC5L,SMAD3,ELK4,FOXC1,RREB1,SOX4,GTF2I,MTF1,HOXC4,TFDP2,EGR1,TCF3,ROR…
GO:MF	protein kinase activity	GO:0004672	3.67206e-07	6.43509	560	4510	222	16109	EPHA4,NUAK1,TBCK,MAPK10,CDK19,CDC42BPA,SRPK1,PRKG1,DDR1,SMG1,EEF2K,IKBKB,HIPK1,BRAF,SCYL2,STK38L,BMP2K,DYRK1A,FYN,TYRO3,MERTK,AAK1,PAN3,ENSCHIG00000021932,LYN,WEE1,CDK18,DYRK3,MARK1,MMD,TLK1,ULK2,ERN1,MAST4,SNRK,TGFBR2,UHMK1,MET,TEC,CDK20,HIPK3,AXL,STRADA,MAP3K1,CDK17,BMPR1B,PIKFYVE,CASK,MAPK3,TESK2,CDKL5,MAPK1,ENSCHIG00000000233,TGFBR3,SRPK2,CDK6,TWF1,GRK6,CDK9,PDIK1L,CAMK1D,NRP1,STK3,GRK3,AKAP1…
GO:MF	DNA-binding transcription factor activity	GO:0003700	7.95086e-07	6.09959	874	4510	323	16109	NFIA,MEOX2,LEF1,NR3C1,ZBTB5,EBF2,TBPL1,HEY1,EHF,AHCTF1,ZNF445,MITF,ONECUT2,ZKSCAN2,TEAD1,ZKSCAN4,PPARD,FOXF2,ENSCHIG00000009137,ETS1,ARNT,PBX1,LHX8,NHLH2,ENSCHIG00000019440,SP1,NFYB,ATF4,RBPJ,PURA,NR4A3,PCBP3,ZNF367,ENSCHIG00000018293,SATB1,HIF1A,MEIS2,PAX7,BCL11A,NACC2,DACH1,KLF10,LHX9,SALL1,NFATC3,VEZF1,DLX4,CREBRF,PAX9,ARID3B,NR2C2,ZNF148,ATF2,CARF,GMEB1,HMBOX1,RFX3,CEBPZ,MEIS1,SMAD9,SNAI2,E2F…
GO:MF	identical protein binding	GO:0042802	1.43751e-06	5.84239	1400	4510	487	16109	RABL3,CLDN1,MASP1,ADIPOQ,CXCR4,IKZF2,EPHA4,KHDRBS1,SYT11,CD53,NAPEPLD,ANO6,USP15,YARS2,SLC9B2,SLC4A4,SORD,DAAM1,GCC2,TRIM21,CDC42BPA,TNFSF18,PDGFC,GZMA,GOLGA5,ENSCHIG00000008358,GSTA4,RIPOR2,RNF40,KIF20B,HOGA1,INPP5F,THRSP,HGF,PPCDC,SMCHD1,CD247,ZKSCAN4,NUP153,ATXN1,CD2AP,VPS4B,SFPQ,IDE,RAB11FIP2,HOOK3,IKBKB,MCU,ETS1,HOOK1,ARNT,STARD3NL,NAMPT,SP1,PHETA2,CASP6,CEP70,CARNMT1,XPA,DYRK1A,FYN,SYT16,GC…
GO:MF	GTPase binding	GO:0051020	1.49085e-06	5.82657	378	4510	158	16109	RAPGEF4,IQGAP3,LAMTOR3,XPO7,IARS1,DAAM1,GARRE1,GOLGA5,EXOC2,RNF152,RABGEF1,RAB11FIP2,RIN1,ITSN1,DOCK7,FNBP1L,RAPGEF5,FGD4,TIAM1,EPS8,RASGRF2,CYFIP2,C9ORF72,ARFGEF3,PLEKHG1,CYRIA,RALGPS1,ARFGEF1,RIMS1,IPO7,PLEKHG5,RALGPS2,DENND1B,FMNL2,NCKAP1,TNPO1,CDC42SE1,TNPO2,NET1,NCF2,RANGRF,ENSCHIG00000015055,KCTD13,EVI5,RASA1,DOCK8,AP1G1,RRAGC,PICALM,ARHGEF9,DENND2C,ELMO1,ENSCHIG00000014970,HACE1,SOS1,SPTBN…
GO:MF	kinase activity	GO:0016301	1.69054e-06	5.77197	721	4510	272	16109	EPHA4,NUAK1,TBCK,MAPK10,PPIP5K2,CDK19,PIP4K2A,CDC42BPA,SRPK1,PRKG1,RFK,DDR1,SMG1,EEF2K,IKBKB,HIPK1,BRAF,SCYL2,STK38L,BMP2K,DYRK1A,FYN,CERT1,TYRO3,MERTK,AAK1,PAN3,ENSCHIG00000021932,LYN,WEE1,PIK3C2B,CDK18,DYRK3,MARK1,GALK1,MMD,TLK1,ULK2,ERN1,MAST4,SNRK,TGFBR2,UHMK1,DGKB,MET,TEC,CDK20,HIPK3,AXL,DGKE,STRADA,MAP3K1,IP6K2,PLXNC1,CDK17,BMPR1B,PIKFYVE,CASK,PKLR,MAPK3,ENSCHIG00000020357,IPMK,CHKA,TESK2,C…
GO:MF	transferase activity, transferring phosphorus-containing groups	GO:0016772	1.85327e-06	5.73206	855	4510	315	16109	EPHA4,TUT4,TWISTNB,NUAK1,TBCK,MAPK10,PPIP5K2,CDK19,PIP4K2A,CDC42BPA,NMNAT2,SRPK1,PRKG1,RFK,DDR1,SMG1,EEF2K,IKBKB,POLB,SAMD8,HIPK1,TENT5C,BRAF,SCYL2,STK38L,BMP2K,CDS1,DYRK1A,FYN,CERT1,TYRO3,MERTK,AAK1,PAN3,CRLS1,ENSCHIG00000021932,LYN,WEE1,PIK3C2B,CDK18,DYRK3,MARK1,POLR2C,GALK1,MMD,TLK1,ULK2,ERN1,MAST4,SNRK,TGFBR2,UHMK1,DGKB,MET,TEC,CDK20,HIPK3,AXL,DGKE,STRADA,MAP3K1,IP6K2,ENSCHIG00000013868,PLXNC…
GO:MF	transcription factor binding	GO:0008134	4.31553e-06	5.36497	427	4510	173	16109	DR1,NFIA,CNOT2,GABARAPL1,BBS7,LEF1,NCOA7,NCOA2,MYOCD,PIK3R1,LCOR,SLC30A9,PPARD,FOXF2,ARNT,NHLH2,MDFIC,SP1,BBS10,NFYB,ATF4,RBPJ,APBB2,PURA,KAT2B,HIF1A,GTF2A1,MEIS2,MTDH,YAP1,PRDM16,SETD6,ERCC3,TP53BP1,NFKBIA,ATF2,CBX5,C1D,TCF23,DNMT3A,E2F5,FOXP1,THRB,NAB1,JARID2,SMAD4,ZNF516,TGFB1I1,ERCC4,TCF7L2,NOTCH2,SRI,EIF4E,NSD1,AKAP8,STRN,ANXA4,CDK9,HNRNPU,NR4A2,DDX5,CCNT1,NEUROD1,CREB1,RBFOX2,ASCL1,STING1,D…
GO:MF	phospholipid binding	GO:0005543	4.49272e-06	5.34749	305	4510	131	16109	MREG,ARAP2,CLVS2,SNX20,APOM,ENSCHIG00000000097,SNX18,PTAFR,SNX29,F3,SYT1,C2CD5,SNX3,SYT16,THBS1,ENSCHIG00000021932,PIK3C2B,ARHGAP35,ENSCHIG00000010440,ENSCHIG00000017907,PPT1,ARFIP1,AXL,KCNJ2,PLD1,TRIM72,SH3PXD2A,PLEKHA1,PLEKHA2,SNX25,PICALM,SNX19,SYT7,ATP13A2,SNX27,SNX13,PHLDA1,TWF1,SNX2,LPAR1,ENSCHIG00000006134,PLA2G4E,SPTBN1,ANXA4,SNX5,PREX1,PIK3C2A,OPA1,PLEKHA8,ANXA1,ABCA1,PLEK,CLVS1,PITPNC1,…
GO:MF	phosphatidylinositol binding	GO:0035091	5.30513e-06	5.2753	194	4510	91	16109	MREG,ARAP2,CLVS2,SNX20,SNX18,SNX29,SNX3,ENSCHIG00000021932,PIK3C2B,ENSCHIG00000017907,ARFIP1,KCNJ2,PLD1,SH3PXD2A,PLEKHA1,PLEKHA2,SNX25,PICALM,SNX19,SYT7,ATP13A2,SNX27,SNX13,PHLDA1,TWF1,SNX2,PLA2G4E,SNX5,PIK3C2A,PLEKHA8,PLEK,CLVS1,PITPNC1,FCHO2,EXOC8,CCDC88A,LANCL2,WIPI2,ING2,ESYT2,GSDME,SNX10,OSBPL8,EEA1,ZFYVE16,ENSCHIG00000007585,FERMT2,SNX16,FCHSD2,ZCCHC14,PLEKHA3,SESTD1,GOLPH3,NCF4,SGK1,APPL2,…
GO:MF	lipid binding	GO:0008289	2.81039e-05	4.55123	503	4510	195	16109	MREG,ARAP2,NR3C1,CLVS2,SNX20,CLIP3,APOM,ENSCHIG00000000097,ENSCHIG00000025589,SNX18,PTAFR,PPARD,SNX29,SCP2,FNBP1L,F3,STARD3NL,SYT1,C2CD5,SNX3,CERT1,SYT16,THBS1,ACBD5,ENSCHIG00000021932,PIK3C2B,ARHGAP35,ENSCHIG00000010440,EPN2,ENSCHIG00000017907,PPT1,DGKB,SOAT1,ARFIP1,AXL,KCNJ2,RBP5,PLD1,TRIM72,ENSCHIG00000024880,ENSCHIG00000000386,SH3PXD2A,PLEKHA1,PLEKHA2,SNX25,PICALM,SNX19,SYT7,ATP13A2,SYP,SNX27…
GO:MF	kinase binding	GO:0019900	3.38464e-05	4.47049	495	4510	192	16109	EPHA4,KHDRBS1,NR3C1,JAKMIP2,SOCS5,CEP68,PKIA,ATP1B1,ANKRA2,ELP2,KIF11,APC,CD247,CACUL1,EXOC2,RAB11FIP2,IKBKB,PRKAG2,PPP1R12A,TIAM1,PJA2,NR4A3,KAT2B,HIF1A,GCH1,NIN,NBEA,ACSL3,PTPN11,CRK,FRMD5,DLG1,ATF2,INKA2,UBQLN1,PER3,CLTC,STRADA,MAP3K1,CAV2,PTPRJ,NEDD9,RNF138,TCF7L2,FRS2,CNTLN,MARCKS,PTPRK,SASH1,CDK9,FAM83A,PIK3IP1,AP1B1,SH2B3,SOX9,ZBTB4,SPAG9,ENSCHIG00000017892,RICTOR,AKAP13,CCNT1,RNF13,GADD45…
GO:MF	carbohydrate derivative binding	GO:0097367	7.94473e-05	4.09992	1974	4510	649	16109	CXCL10,CCT8,ARL13B,ATP6V1A,RABL3,ADIPOQ,RAPGEF4,EPHA4,PGLYRP3,HAO2,FIGNL1,NUAK1,YARS2,ABCC9,NDNF,TBCK,MAPK10,HMMR,PPIP5K2,IARS1,ENSCHIG00000010087,TUBE1,CDK19,AFG1L,ENSCHIG00000017313,ENSCHIG00000027081,ARL5B,PIP4K2A,CDC42BPA,ATP1B1,RFC5,CHD9,CLIP3,MTRR,SRPK1,TBCC,RAB27B,PRKG1,KIF20B,KIF11,CFTR,RFK,SRXN1,TTLL6,HCN1,PTAFR,SMCHD1,ACTR8,ATP2B2,DDR1,DNAH8,VPS4B,SMG1,EEF2K,IDE,IKBKB,RAB3B,SCP2,ENSCHIG…
GO:MF	small GTPase binding	GO:0031267	8.34545e-05	4.07855	260	4510	111	16109	RAPGEF4,IQGAP3,XPO7,DAAM1,GARRE1,GOLGA5,EXOC2,RNF152,RABGEF1,RAB11FIP2,RIN1,DOCK7,TIAM1,EPS8,RASGRF2,CYFIP2,C9ORF72,CYRIA,RALGPS1,RIMS1,IPO7,PLEKHG5,DENND1B,FMNL2,NCKAP1,TNPO1,CDC42SE1,TNPO2,NCF2,RANGRF,KCTD13,EVI5,AP1G1,PICALM,DENND2C,HACE1,SOS1,PREX2,SORL1,RABGAP1L,CORO1C,KPNB1,AKAP13,ECT2,DOCK4,RIC1,ABCA1,ARHGEF12,RAB3GAP2,EXOC8,AP3M1,RAP1A,GGA2,PKN2,MICALL1,DENND4C,DENND4A,EXOC5,XPO1,RABGAP1,…
GO:MF	Ras GTPase binding	GO:0017016	0.000117933	3.92837	250	4510	107	16109	RAPGEF4,IQGAP3,XPO7,DAAM1,GARRE1,GOLGA5,EXOC2,RABGEF1,RAB11FIP2,RIN1,DOCK7,TIAM1,EPS8,RASGRF2,CYFIP2,C9ORF72,CYRIA,RALGPS1,RIMS1,IPO7,PLEKHG5,DENND1B,FMNL2,NCKAP1,TNPO1,CDC42SE1,TNPO2,NCF2,RANGRF,KCTD13,EVI5,AP1G1,PICALM,DENND2C,HACE1,SOS1,PREX2,RABGAP1L,CORO1C,KPNB1,AKAP13,ECT2,DOCK4,RIC1,ARHGEF12,RAB3GAP2,EXOC8,AP3M1,RAP1A,PKN2,MICALL1,DENND4C,DENND4A,EXOC5,XPO1,RABGAP1,USP6NL,ARHGEF17,DENND5A,…
GO:MF	ubiquitin-like protein ligase activity	GO:0061659	0.000161787	3.79106	148	4510	70	16109	UBR1,ITCH,TRIM25,UBR3,RNF152,RNF125,RABGEF1,RNF170,FBXO40,ZNRF2,TMEM129,JADE2,UBR5,RNF10,UBE3A,RNF38,RNF111,UBE4A,RNF185,TRIM72,UBR2,MYLIP,NEDD4L,MEX3C,RNF138,ENSCHIG00000016249,RNF13,ASB4,MARCHF1,RCHY1,UFL1,PELI1,UBE4B,RBBP6,RNF11,TRIM24,UHRF1,FBXO30,ENSCHIG00000017824,RC3H2,WWP1,FBXW11,RNF180,DZIP3,LTN1,ZNF451,UHRF2,BRAP,MSL2,BFAR,SIAH2,ASB1,SYVN1,RNF183,PIAS1,IRF2BPL,ZNRF1,CBX4,SMURF2,MARCHF6,…
GO:MF	adenyl nucleotide binding	GO:0030554	0.000204456	3.6894	1413	4510	476	16109	CCT8,ATP6V1A,RAPGEF4,EPHA4,FIGNL1,NUAK1,YARS2,ABCC9,TBCK,MAPK10,PPIP5K2,IARS1,CDK19,AFG1L,ENSCHIG00000017313,ENSCHIG00000027081,PIP4K2A,CDC42BPA,ATP1B1,RFC5,CHD9,SRPK1,PRKG1,KIF20B,KIF11,CFTR,RFK,SRXN1,TTLL6,HCN1,SMCHD1,ACTR8,ATP2B2,DDR1,DNAH8,VPS4B,SMG1,EEF2K,IDE,IKBKB,SCP2,HIPK1,PRKAG2,BRAF,BBS10,SCYL2,STK38L,ATP8A1,BMP2K,DYRK1A,FYN,TYRO3,MERTK,AAK1,PAN3,ACBD5,ENSCHIG00000021932,LYN,MCM4,WEE1,D…
GO:MF	purine nucleotide binding	GO:0017076	0.000216816	3.66391	1790	4510	590	16109	CCT8,ARL13B,ATP6V1A,RABL3,RAPGEF4,EPHA4,FIGNL1,NUAK1,YARS2,ABCC9,TBCK,MAPK10,PPIP5K2,IARS1,ENSCHIG00000010087,TUBE1,CDK19,AFG1L,ENSCHIG00000017313,ENSCHIG00000027081,ARL5B,PIP4K2A,CDC42BPA,ATP1B1,RFC5,CHD9,SRPK1,TBCC,RAB27B,PRKG1,KIF20B,KIF11,CFTR,RFK,SRXN1,TTLL6,HCN1,SMCHD1,ACTR8,ATP2B2,DDR1,DNAH8,VPS4B,SMG1,EEF2K,IDE,IKBKB,RAB3B,SCP2,ENSCHIG00000016414,HIPK1,PRKAG2,ENSCHIG00000013093,BRAF,RAB21…
GO:MF	transmembrane receptor protein kinase activity	GO:0019199	0.000228993	3.64018	69	4510	39	16109	EPHA4,DDR1,TYRO3,MERTK,TGFBR2,MET,AXL,BMPR1B,TGFBR3,NRP1,EGFR,EPHA3,DDR2,PDGFRA,KDR,EPHA6,EPHA5,NTRK2,MUSK,EPHA7,FGFR1,TGFBR1,IGF1R,NTRK3,INSR,NRP2,ACVR1B,TEK,BMPR2,RET,CSF1R,ROS1,ACVRL1,KIT,PDGFRB,ACVR2B,SOSTDC1,EFEMP1,FGFR2
GO:MF	adenyl ribonucleotide binding	GO:0032559	0.000236244	3.62664	1408	4510	474	16109	CCT8,ATP6V1A,RAPGEF4,EPHA4,FIGNL1,NUAK1,YARS2,ABCC9,TBCK,MAPK10,PPIP5K2,IARS1,CDK19,AFG1L,ENSCHIG00000017313,ENSCHIG00000027081,PIP4K2A,CDC42BPA,ATP1B1,RFC5,CHD9,SRPK1,PRKG1,KIF20B,KIF11,CFTR,RFK,SRXN1,TTLL6,HCN1,SMCHD1,ACTR8,ATP2B2,DDR1,DNAH8,VPS4B,SMG1,EEF2K,IDE,IKBKB,SCP2,HIPK1,PRKAG2,BRAF,BBS10,SCYL2,STK38L,ATP8A1,BMP2K,DYRK1A,FYN,TYRO3,MERTK,AAK1,PAN3,ACBD5,ENSCHIG00000021932,LYN,MCM4,WEE1,D…
GO:MF	SMAD binding	GO:0046332	0.000283008	3.5482	67	4510	38	16109	USP15,MYOCD,ENSCHIG00000008899,PURA,IPO7,PRDM16,TGFBR2,BMPR1B,SMAD4,TGFB1I1,TGFBR3,PMEPA1,ZEB2,DDX5,TRIM33,PAX6,ANKRD1,SMAD3,PURB,TOB1,MEF2A,CTNNB1,ZBTB7A,TGFBR1,TGFBRAP1,ACVR1B,DAB2,JUN,SKI,SMAD1,SMURF2,ACVRL1,RANBP3L,YY1,SMAD7,SMURF1,HIPK2,FOXH1
GO:MF	protein serine/threonine kinase activity	GO:0004674	0.000300362	3.52236	339	4510	136	16109	NUAK1,MAPK10,CDK19,CDC42BPA,SRPK1,PRKG1,SMG1,EEF2K,IKBKB,BRAF,STK38L,DYRK1A,ENSCHIG00000021932,CDK18,DYRK3,TLK1,ULK2,ERN1,MAST4,SNRK,TGFBR2,UHMK1,CDK20,HIPK3,BMPR1B,PIKFYVE,CASK,MAPK3,MAPK1,TGFBR3,SRPK2,CDK6,GRK6,CDK9,PDIK1L,CAMK1D,STK3,GRK3,AKAP13,MAP3K13,MAP3K20,MAP3K12,PRKG2,MAP3K5,TRPM7,CDKL4,RIOK1,MAP3K21,PRKAB2,CDK14,PRKCB,CILK1,LIMK1,CHUK,CDC42BPG,PRKAA2,PKN2,STK17A,WNK1,PIM3,MAPK9,LATS1,T…
GO:MF	purine ribonucleotide binding	GO:0032555	0.000316807	3.49921	1778	4510	585	16109	CCT8,ARL13B,ATP6V1A,RABL3,RAPGEF4,EPHA4,FIGNL1,NUAK1,YARS2,ABCC9,TBCK,MAPK10,PPIP5K2,IARS1,ENSCHIG00000010087,TUBE1,CDK19,AFG1L,ENSCHIG00000017313,ENSCHIG00000027081,ARL5B,PIP4K2A,CDC42BPA,ATP1B1,RFC5,CHD9,SRPK1,TBCC,RAB27B,PRKG1,KIF20B,KIF11,CFTR,RFK,SRXN1,TTLL6,HCN1,SMCHD1,ACTR8,ATP2B2,DDR1,DNAH8,VPS4B,SMG1,EEF2K,IDE,IKBKB,RAB3B,SCP2,ENSCHIG00000016414,HIPK1,PRKAG2,ENSCHIG00000013093,BRAF,RAB21…
GO:MF	nucleotide binding	GO:0000166	0.00036824	3.43387	2010	4510	654	16109	CCT8,ARL13B,ATP6V1A,RABL3,RAPGEF4,ORC4,ENSCHIG00000020570,EPHA4,HAO2,DHCR24,FIGNL1,NUAK1,YARS2,ABCC9,TBCK,MAPK10,PPIP5K2,IARS1,ENSCHIG00000010087,TUBE1,CDK19,AFG1L,ENSCHIG00000017313,NT5E,SORD,ENSCHIG00000027081,ARL5B,PIP4K2A,CDC42BPA,ATP1B1,FMO2,RFC5,CHD9,MTRR,SRPK1,TBCC,RAB27B,PRKG1,KIF20B,KIF11,CFTR,RFK,SRXN1,TTLL6,HCN1,SMCHD1,ACTR8,ATP2B2,DDR1,DNAH8,VPS4B,SMG1,EEF2K,IDE,IKBKB,RAB3B,SCP2,ENSCH…
GO:MF	nucleoside phosphate binding	GO:1901265	0.00036824	3.43387	2010	4510	654	16109	CCT8,ARL13B,ATP6V1A,RABL3,RAPGEF4,ORC4,ENSCHIG00000020570,EPHA4,HAO2,DHCR24,FIGNL1,NUAK1,YARS2,ABCC9,TBCK,MAPK10,PPIP5K2,IARS1,ENSCHIG00000010087,TUBE1,CDK19,AFG1L,ENSCHIG00000017313,NT5E,SORD,ENSCHIG00000027081,ARL5B,PIP4K2A,CDC42BPA,ATP1B1,FMO2,RFC5,CHD9,MTRR,SRPK1,TBCC,RAB27B,PRKG1,KIF20B,KIF11,CFTR,RFK,SRXN1,TTLL6,HCN1,SMCHD1,ACTR8,ATP2B2,DDR1,DNAH8,VPS4B,SMG1,EEF2K,IDE,IKBKB,RAB3B,SCP2,ENSCH…
GO:MF	zinc ion binding	GO:0008270	0.000419319	3.37745	663	4510	241	16109	ZMAT3,PHC3,TRIM63,PGLYRP3,TUT4,NAPEPLD,PRICKLE1,NR3C1,SLU7,UBR1,SORD,MMP7,TRIM21,ENSCHIG00000020210,MBTD1,UBR3,PPARD,ESCO1,RNF125,FBXL19,RABGEF1,MMP25,IDE,RBM4B,FBXO40,ZSWIM5,GATAD1,SEC24A,KDM4B,GATAD2A,BNC2,NR4A3,PHF2,GCH1,ZMYM2,UBR5,RC3H1,KDM5B,TIMP2,LIG3,NR2C2,ENSCHIG00000016989,TRHDE,MSRB3,ENSCHIG00000025746,TRIM36,SETDB2,HHIP,MAP3K1,ANPEP,RARB,THRB,RGN,PIKFYVE,ENSCHIG00000015629,TRIM72,UBR2,…
GO:MF	small molecule binding	GO:0036094	0.000475312	3.32302	2282	4510	734	16109	CCT8,ARL13B,ATP6V1A,RABL3,ADIPOQ,RAPGEF4,ORC4,ENSCHIG00000020570,EPHA4,HAO2,DHCR24,FIGNL1,NUAK1,YARS2,ABCC9,TBCK,MAPK10,HMMR,PPIP5K2,IARS1,ENSCHIG00000010087,TUBE1,CDK19,AFG1L,ENSCHIG00000017313,NT5E,UBR1,SORD,ENSCHIG00000027081,ARL5B,PIP4K2A,CDC42BPA,ATP1B1,FMO2,RFC5,CHD9,MTRR,SRPK1,TBCC,RAB27B,PRKG1,KIF20B,KIF11,CFTR,RFK,SRXN1,TTLL6,HCN1,SMCHD1,ACTR8,ATP2B2,GADL1,DDR1,PPARD,DNAH8,VPS4B,SMG1,EEF…
GO:MF	protein kinase binding	GO:0019901	0.000489647	3.31012	435	4510	167	16109	EPHA4,KHDRBS1,NR3C1,SOCS5,CEP68,PKIA,ATP1B1,ANKRA2,ELP2,KIF11,APC,CD247,CACUL1,EXOC2,RAB11FIP2,IKBKB,PRKAG2,PPP1R12A,PJA2,NR4A3,KAT2B,HIF1A,GCH1,NBEA,ACSL3,PTPN11,CRK,FRMD5,DLG1,ATF2,INKA2,CLTC,MAP3K1,CAV2,PTPRJ,NEDD9,RNF138,TCF7L2,FRS2,CNTLN,MARCKS,PTPRK,SASH1,CDK9,FAM83A,AP1B1,SH2B3,SOX9,ZBTB4,SPAG9,ENSCHIG00000017892,RICTOR,CCNT1,RNF13,DOCK4,MAP3K12,STING1,UFL1,MAP3K5,SHC4,PLEK,PCNA,PAX6,CASP9…
GO:MF	ribonucleotide binding	GO:0032553	0.000528833	3.27668	1791	4510	587	16109	CCT8,ARL13B,ATP6V1A,RABL3,RAPGEF4,EPHA4,HAO2,FIGNL1,NUAK1,YARS2,ABCC9,TBCK,MAPK10,PPIP5K2,IARS1,ENSCHIG00000010087,TUBE1,CDK19,AFG1L,ENSCHIG00000017313,ENSCHIG00000027081,ARL5B,PIP4K2A,CDC42BPA,ATP1B1,RFC5,CHD9,MTRR,SRPK1,TBCC,RAB27B,PRKG1,KIF20B,KIF11,CFTR,RFK,SRXN1,TTLL6,HCN1,SMCHD1,ACTR8,ATP2B2,DDR1,DNAH8,VPS4B,SMG1,EEF2K,IDE,IKBKB,RAB3B,SCP2,ENSCHIG00000016414,HIPK1,PRKAG2,ENSCHIG00000013093,…
GO:MF	ubiquitin protein ligase activity	GO:0061630	0.000542249	3.2658	141	4510	66	16109	UBR1,ITCH,TRIM25,UBR3,RNF152,RNF125,RABGEF1,RNF170,FBXO40,ZNRF2,TMEM129,JADE2,UBR5,RNF10,UBE3A,RNF38,RNF111,UBE4A,RNF185,TRIM72,UBR2,MYLIP,NEDD4L,MEX3C,RNF138,ENSCHIG00000016249,RNF13,ASB4,MARCHF1,RCHY1,PELI1,UBE4B,RBBP6,RNF11,TRIM24,UHRF1,FBXO30,ENSCHIG00000017824,RC3H2,WWP1,FBXW11,RNF180,DZIP3,LTN1,UHRF2,BRAP,MSL2,BFAR,SIAH2,ASB1,SYVN1,RNF183,IRF2BPL,ZNRF1,SMURF2,MARCHF6,RNF115,MARCHF5,TRIM9,RF…
GO:MF	DNA-binding transcription factor binding	GO:0140297	0.000740758	3.13032	232	4510	98	16109	GABARAPL1,BBS7,LEF1,NCOA7,NCOA2,MYOCD,LCOR,SLC30A9,ARNT,NHLH2,MDFIC,SP1,BBS10,NFYB,ATF4,RBPJ,HIF1A,GTF2A1,MTDH,YAP1,PRDM16,SETD6,TP53BP1,NFKBIA,ATF2,CBX5,C1D,TCF23,FOXP1,ZNF516,TGFB1I1,TCF7L2,NOTCH2,SRI,EIF4E,NSD1,AKAP8,STRN,ANXA4,NR4A2,DDX5,NEUROD1,CREB1,ASCL1,DNAAF4,SRF,GMNN,SMAD3,NCOA1,PROX1,PRKCB,HES6,GTF2I,TRIM24,EP300,PPARGC1B,TCF3,HEY2,LATS1,RB1,TAF4,TBX3,MED25,MED13,SMARCE1,MEF2A,CTNNB1,H…
GO:MF	purine ribonucleoside triphosphate binding	GO:0035639	0.000870055	3.06045	1734	4510	568	16109	CCT8,ARL13B,ATP6V1A,RABL3,EPHA4,FIGNL1,NUAK1,YARS2,ABCC9,TBCK,MAPK10,PPIP5K2,IARS1,ENSCHIG00000010087,TUBE1,CDK19,AFG1L,ENSCHIG00000017313,ENSCHIG00000027081,ARL5B,PIP4K2A,CDC42BPA,ATP1B1,RFC5,CHD9,SRPK1,TBCC,RAB27B,PRKG1,KIF20B,KIF11,CFTR,RFK,SRXN1,TTLL6,SMCHD1,ACTR8,ATP2B2,DDR1,DNAH8,VPS4B,SMG1,EEF2K,IDE,IKBKB,RAB3B,ENSCHIG00000016414,HIPK1,PRKAG2,ENSCHIG00000013093,BRAF,RAB21,BBS10,SCYL2,STK38…
GO:MF	ATP binding	GO:0005524	0.00108158	2.96594	1369	4510	457	16109	CCT8,ATP6V1A,EPHA4,FIGNL1,NUAK1,YARS2,ABCC9,TBCK,MAPK10,PPIP5K2,IARS1,CDK19,AFG1L,ENSCHIG00000017313,ENSCHIG00000027081,PIP4K2A,CDC42BPA,ATP1B1,RFC5,CHD9,SRPK1,PRKG1,KIF20B,KIF11,CFTR,RFK,SRXN1,TTLL6,SMCHD1,ACTR8,ATP2B2,DDR1,DNAH8,VPS4B,SMG1,EEF2K,IDE,IKBKB,HIPK1,PRKAG2,BRAF,BBS10,SCYL2,STK38L,ATP8A1,BMP2K,DYRK1A,FYN,TYRO3,MERTK,AAK1,PAN3,ENSCHIG00000021932,LYN,MCM4,WEE1,DDX6,PIK3C2B,CDK18,DYRK3,…
GO:MF	cytoskeletal protein binding	GO:0008092	0.00162656	2.78873	718	4510	255	16109	CXCR4,TRIM63,IQGAP3,SYT11,PSRC1,GAS2L3,SYNPO2,JAKMIP2,GJA1,DAAM1,CACNB2,ABRA,CLIP3,ENC1,MAGI1,TBCC,VAPA,RAB27B,KIF20B,KIF11,PDLIM3,APC,PFN4,TTLL6,ENSCHIG00000023712,MYL12B,EPB41L3,TRAF3IP1,SBDS,HOOK3,POLB,GAS2,RAB3B,HOOK1,EPS8,CACNA1C,CEP70,RAB14,ENSCHIG00000012659,DYRK1A,FYN,JMY,GMFB,TLN2,EPB41L1,ARFGEF1,MTSS1,LIN7C,RAB6A,ENAH,SSH1,MAP9,PTPN4,FMNL2,PAFAH1B1,FRMD5,DAG1,CAPZA1,PDE4B,PKD2,TPM4,TRIM…
GO:MF	organic cyclic compound binding	GO:0097159	0.00308427	2.51085	5422	4510	1635	16109	RIDA,CCT8,ARL13B,ATP6V1A,RABL3,ZMAT3,PHC3,RAPGEF4,ORC4,ENSCHIG00000020570,ORC2,IKZF2,EPHA4,KHDRBS1,HAO2,RNPC3,DR1,NFIA,DHCR24,TUT4,FIGNL1,MEOX2,HBP1,POT1,NUAK1,YARS2,ABCC9,LEF1,TBCK,TRMT10A,KLF3,THAP9,MAPK10,NR3C1,G3BP1,SLU7,PPIP5K2,ZBTB5,EBF2,IARS1,ENSCHIG00000010087,TUBE1,CDK19,AFG1L,ENSCHIG00000017313,TBPL1,BCLAF1,NT5E,PPIL4,MTRF1L,TTC5,SORD,PAIP2B,ENSCHIG00000027081,ARL5B,PIP4K2A,ADNP,NCOA2,H…
GO:MF	heterocyclic compound binding	GO:1901363	0.00309686	2.50908	5380	4510	1623	16109	RIDA,CCT8,ARL13B,ATP6V1A,RABL3,ZMAT3,PHC3,RAPGEF4,ORC4,ENSCHIG00000020570,ORC2,IKZF2,EPHA4,KHDRBS1,HAO2,RNPC3,DR1,NFIA,DHCR24,TUT4,FIGNL1,MEOX2,HBP1,POT1,NUAK1,YARS2,ABCC9,LEF1,TBCK,TRMT10A,KLF3,THAP9,MAPK10,NR3C1,G3BP1,SLU7,PPIP5K2,ZBTB5,EBF2,IARS1,ENSCHIG00000010087,TUBE1,CDK19,AFG1L,ENSCHIG00000017313,TBPL1,BCLAF1,NT5E,PPIL4,MTRF1L,TTC5,SORD,PAIP2B,ENSCHIG00000027081,ARL5B,PIP4K2A,ADNP,NCOA2,H…
GO:MF	transmembrane receptor protein tyrosine kinase activity	GO:0004714	0.00433323	2.36319	53	4510	30	16109	EPHA4,DDR1,TYRO3,MERTK,MET,AXL,NRP1,EGFR,EPHA3,DDR2,PDGFRA,KDR,EPHA6,EPHA5,NTRK2,MUSK,EPHA7,FGFR1,IGF1R,NTRK3,INSR,NRP2,TEK,RET,CSF1R,ROS1,KIT,PDGFRB,EFEMP1,FGFR2
GO:MF	phosphatidylinositol phosphate binding	GO:1901981	0.00903662	2.04399	112	4510	52	16109	ARAP2,CLVS2,SNX18,SNX3,ARFIP1,KCNJ2,SH3PXD2A,PLEKHA1,PLEKHA2,SYT7,ATP13A2,SNX27,SNX13,PHLDA1,TWF1,PLA2G4E,PLEKHA8,PLEK,CLVS1,FCHO2,LANCL2,WIPI2,GSDME,OSBPL8,ZFYVE16,FERMT2,FCHSD2,PLEKHA3,SESTD1,GOLPH3,NCF4,SYT5,IQGAP1,TECPR1,SNX11,SYTL2,LDLRAP1,ENSCHIG00000017930,ANKFY1,HIP1,CYTH3,ARHGAP32,VPS36,JPH2,WDR45B,ARAP3,CGAS,PLCB1,ACTN2,KIF16B,TTPA,FGD2
GO:MF	protein domain specific binding	GO:0019904	0.0116077	1.93526	428	4510	158	16109	EPHA4,KHDRBS1,LEF1,CEP68,NCOA2,VAPA,RAB27B,KIF20B,CFTR,CD2AP,ZNF521,RUFY2,ARHGAP29,SP1,ARF1,XPA,FYN,QKI,HIF1A,STYX,RHOQ,ABI1,LYN,ACSL3,LIN7C,RAB6A,CBL,DDX6,ENAH,CRK,RABEP1,ARHGAP5,DAG1,DLG1,FN1,PKD2,SRP72,BCL2L2,NDFIP2,ARFIP1,SRSF1,IKBKG,TCF7L2,PLEKHA1,ADAM12,PLEKHA2,SYP,HOXA3,ELMO1,RAP2B,CLCN3,CNTLN,LPAR1,STRN,PMEPA1,YWHAB,SDC2,SRSF9,VASP,KPNB1,DDX5,SON,CHMP2B,ARHGAP31,TP63,MLF1,DOCK4,ARL1,MAP3K…
GO:MF	catalytic activity	GO:0003824	0.016225	1.78981	5339	4510	1601	16109	RIDA,ATP6V1A,XXYLT1,MASP1,NCEH1,TTC3,PPIG,DPP10,ENSCHIG00000020570,ENSCHIG00000017628,EPHA4,RHBDD1,DHDDS,PGLYRP3,HAO2,ENSCHIG00000013246,DHCR24,TUT4,TWISTNB,NAPEPLD,FKBP14,CNOT2,USP15,NUAK1,YARS2,ABCC9,TBCK,TRMT10A,PPM1K,SULT1B1,THAP9,MAPK10,ENSCHIG00000003874,ALDH7A1,GM2A,SLU7,PPIP5K2,GALNTL6,ADAMTSL1,ALDH1A1,CDC14C,IARS1,ENSCHIG00000010087,TUBE1,ENSCHIG00000020077,CDK19,ENSCHIG00000017313,PDE7B…
GO:MF	protein C-terminus binding	GO:0008022	0.0164116	1.78485	114	4510	52	16109	ECM1,ATP1B1,ATXN1,VPS4B,SP1,KPNA3,AGO2,NPAT,YAP1,ERCC3,DLG1,FN1,NCF2,ERCC4,ERCC6,HIC2,PIAS3,SASH1,CNRIP1,PRRC2C,PCNA,PRDX3,CEP135,MRE11,EP300,FBLN1,SRC,NIPBL,TERT,CTNNB1,PTK2B,PPP2CA,CACNA1B,ENSCHIG00000017940,CDK7,NEFL,DAB2,FBLN5,FIGN,CENPF,MPDZ,VGLL2,SDC1,BRCA2,VPS36,OPTN,KSR1,LIG4,TOP2A,CEP120,CCN2,TERF2
GO:MF	activating transcription factor binding	GO:0033613	0.0182138	1.7396	56	4510	30	16109	NHLH2,PRDM16,TP53BP1,ATF2,TCF23,ZNF516,NEUROD1,CREB1,SMAD3,GTF2I,EP300,TCF3,HEY2,RB1,TBX3,MEF2A,CTNNB1,HNF4A,ZBTB7A,NEK6,TBX6,GABPA,MEF2C,HDAC4,JUN,NCOR1,SUB1,TBX20,HIPK2,DHX33
GO:MF	RNA polymerase II-specific DNA-binding transcription factor binding	GO:0061629	0.0200236	1.69846	183	4510	76	16109	GABARAPL1,BBS7,LEF1,NCOA7,NCOA2,MYOCD,LCOR,SLC30A9,ARNT,NHLH2,MDFIC,BBS10,RBPJ,HIF1A,GTF2A1,MTDH,SETD6,TP53BP1,NFKBIA,ATF2,C1D,TCF23,FOXP1,TGFB1I1,TCF7L2,NOTCH2,NSD1,AKAP8,STRN,ANXA4,NR4A2,DDX5,NEUROD1,CREB1,DNAAF4,SRF,SMAD3,NCOA1,PROX1,PRKCB,HES6,GTF2I,TRIM24,EP300,PPARGC1B,TCF3,HEY2,LATS1,RB1,TAF4,TBX3,MED25,MED13,SMARCE1,CTNNB1,HNF4A,ZBTB7A,VDR,TBX6,THRAP3,NR1H4,BRD8,TCERG1,HIF1AN,TACC1,JUN,PP…
GO:MF	chromatin binding	GO:0003682	0.0232627	1.63334	377	4510	140	16109	NFIA,LEF1,EBF2,TTC5,ADNP,NCOA2,EXO1,ZNF445,MITF,SLC30A9,H1-3,MEIOB,SFPQ,KMT5B,RBPJ,STAG1,ENSCHIG00000018293,SATB1,KAT2B,WAC,YAP1,RBL2,ERCC3,ATF2,CBX5,MEIS1,DNMT3A,FOXP1,BEND6,THRB,JARID2,SMAD4,ENSCHIG00000004774,ERCC4,ERCC6,FLI1,SIN3B,AJUBA,CDK9,HNRNPU,SATB2,SPHK2,SOX9,EGFR,CCNT1,TP63,BCL6,NEUROD1,GADD45A,ASCL1,PLAC8,PCNA,PAX6,TASOR,SRF,GMNN,SMAD3,NCOA1,MBD5,ELK4,FOXC1,PRKCB,CDYL,MCMBP,ING2,PRKAA…
GO:MF	histone deacetylase binding	GO:0042826	0.024173	1.61667	88	4510	42	16109	LEF1,MYOCD,ANKRA2,LCOR,MIER1,SFPQ,SP1,KAT2B,HIF1A,NACC2,CBX5,UHRF1BP1,AKAP8,YWHAB,SP2,NR2C1,GMNN,ANKRD1,PKN2,HES1,HEY2,CEBPB,SIRT2,NIPBL,MEF2A,HDAC9,MEF2C,TP53,DHX36,HDAC4,TFAP4,NCOR1,TOP2A,CCND1,CIR1,CRY1,MAPK8,HOXA10,NRIP1,WDTC1,NR2E1,TAL1
GO:MF	phosphoric ester hydrolase activity	GO:0042578	0.0291459	1.53542	323	4510	122	16109	NAPEPLD,PPM1K,CDC14C,PDE7B,NT5E,PLCXD3,ENSCHIG00000006638,INPP5F,DUSP4,CDC14A,PDE1C,DUSP6,STYX,ENSCHIG00000017744,SGPP2,SSH1,PTPN11,PTPN4,PPM1E,PLPPR4,PDE4B,ENOPH1,FBP2,EYA4,PIP4P1,PDP2,PLD1,PTPRJ,HDHD2,PLPP4,SMPD4,PPM1H,PTPRS,RNGTT,PTPRK,ENPP1,ALPL,PTP4A2,PDE7A,GPLD1,PLPP1,PTPN9,PTPRG,CTDSPL,PLCXD2,DUSP19,ENSCHIG00000026959,PRUNE1,ENSCHIG00000022600,NT5C3A,PTPRR,CTDSP2,PTPDC1,SGPP1,PPP6C,BPNT2,M…
GO:MF	DNA-binding transcription repressor activity, RNA polymerase II-specific	GO:0001227	0.0323757	1.48978	197	4510	80	16109	NR3C1,ZBTB5,PPARD,PCBP3,ENSCHIG00000018293,SATB1,BCL11A,NACC2,DACH1,SALL1,NFATC3,DLX4,ZNF148,HMBOX1,SNAI2,FOXP1,JARID2,BACH1,MYT1L,KCNIP3,MXD1,CREM,ZNF281,ZEB2,ZBTB4,SP2,BCL6,NR2C1,ASCL1,SMAD5,PAX6,IKZF5,ARID5B,E2F8,PROX1,HES6,GFI1,HES1,PURB,HOXA2,TCF3,NFIL3,HEY2,CGGBP1,ZEB1,ZBTB16,TBX3,ZNF536,SP3,CNBP,ZBTB20,ZBTB7A,SNAI3,ETV6,THAP11,BCL6B,THAP1,HEYL,OVOL1,JUN,ZBTB21,GZF1,SOX6,SKI,PRDM2,POU4F2,ZN…
GO:MF	enzyme activator activity	GO:0008047	0.0369509	1.43238	300	4510	114	16109	LAMTOR3,RAP1GDS1,ARAP2,ARHGAP24,GM2A,ATP1B1,RAP1GAP2,RASAL2,SFRP2,RIN1,ITSN1,ARHGAP29,PRKAG2,TBC1D9B,PLAA,ASAP2,TBC1D4,ABI1,DNAJB2,ARHGAP35,RABEP1,AZIN1,FN1,TBC1D15,NCF2,STRADA,EVI5,RASA1,ARHGAP20,ERCC6,ARFGAP3,GNAQ,MYO9A,NRP1,RALGAPB,PREX2,RABGAP1L,TBC1D9,GIT1,RALGAPA1,ARHGAP31,PIK3CA,ECT2,PRKRA,HTR2B,RGS4,DOCK4,ARL1,CLPX,ELMOD3,ARHGEF12,RGS1,RAB3GAP2,ELMOD2,CCL8,TBC1D2B,DCP1A,AFAP1L2,FBLN1,PRKC…
GO:MF	proline-rich region binding	GO:0070064	0.0412061	1.38504	12	4510	10	16109	GAREM1,ITSN1,YAP1,BAIAP2,ENSCHIG00000017824,WBP4,CYLD,BAIAP2L1,TCERG1,CCND1
GO:MF	DNA-binding transcription repressor activity	GO:0001217	0.0482598	1.31641	199	4510	80	16109	NR3C1,ZBTB5,PPARD,PCBP3,ENSCHIG00000018293,SATB1,BCL11A,NACC2,DACH1,SALL1,NFATC3,DLX4,ZNF148,HMBOX1,SNAI2,FOXP1,JARID2,BACH1,MYT1L,KCNIP3,MXD1,CREM,ZNF281,ZEB2,ZBTB4,SP2,BCL6,NR2C1,ASCL1,SMAD5,PAX6,IKZF5,ARID5B,E2F8,PROX1,HES6,GFI1,HES1,PURB,HOXA2,TCF3,NFIL3,HEY2,CGGBP1,ZEB1,ZBTB16,TBX3,ZNF536,SP3,CNBP,ZBTB20,ZBTB7A,SNAI3,ETV6,THAP11,BCL6B,THAP1,HEYL,OVOL1,JUN,ZBTB21,GZF1,SOX6,SKI,PRDM2,POU4F2,ZN…
GO:BP	positive regulation of biological process	GO:0048518	6.43344e-41	40.1916	4144	4434	1542	15439	KITLG,RIDA,CXCL10,CCT8,CLDN1,MASP1,ADIPOQ,DCUN1D1,CXCR4,DPP10,IKZF2,EPHA4,RHBDD1,KHDRBS1,IQGAP3,SYT11,ECM1,CD53,PSRC1,ELAPOR1,NFIA,TUT4,LURAP1,MEOX2,NAPEPLD,POT1,ANO6,PRICKLE1,CNOT2,USP15,IGF1,KLRK1,CLEC7A,BBS7,NDNF,LEF1,SLC9B2,LAMTOR3,TMEM33,SLAIN2,SLC4A4,TNFAIP8,NR3C1,G3BP1,ARRDC3,EBF2,NCOA7,GJA1,ATG5,TBPL1,BCLAF1,HOMER1,HACD3,TTC5,ICE2,FGF7,BLOC1S6,SOCS5,PIP4K2A,CACNB2,EPC1,ITCH,TGM2,NCOA2,ABR…
GO:BP	positive regulation of cellular process	GO:0048522	7.09421e-41	40.1491	3775	4434	1426	15439	KITLG,RIDA,CXCL10,CCT8,CLDN1,ADIPOQ,DCUN1D1,CXCR4,DPP10,IKZF2,EPHA4,RHBDD1,KHDRBS1,IQGAP3,SYT11,ECM1,CD53,PSRC1,ELAPOR1,NFIA,LURAP1,MEOX2,NAPEPLD,POT1,ANO6,PRICKLE1,CNOT2,USP15,IGF1,KLRK1,CLEC7A,BBS7,NDNF,LEF1,SLC9B2,LAMTOR3,TMEM33,SLAIN2,SLC4A4,TNFAIP8,NR3C1,G3BP1,ARRDC3,EBF2,NCOA7,GJA1,ATG5,TBPL1,BCLAF1,TTC5,ICE2,FGF7,BLOC1S6,SOCS5,PIP4K2A,CACNB2,EPC1,ITCH,TGM2,NCOA2,ABRA,RRP8,TRIM21,EHF,SLC1A2…
GO:BP	cellular component organization	GO:0016043	1.29128e-33	32.889	4061	4434	1484	15439	CXCL10,CCT8,ARL13B,CLDN1,MAIP1,ABI2,EPHA4,STX12,MREG,IQGAP3,SYT11,ANP32E,CD53,PSRC1,ELAPOR1,DR1,NFIA,DHCR24,FIGNL1,POT1,LRRC4,CEP41,ANO6,CNOT2,USP15,GAS2L3,IGF1,CLEC7A,BBS7,NDNF,LEF1,TBCK,NCAPG,TMEM33,GABRA2,SLAIN2,NR3C1,G3BP1,SLU7,STX17,CLVS2,GJA1,AFG1L,ATG5,TBPL1,MTRF1L,FGF7,BLOC1S6,DAAM1,GCC2,CEP68,ENSCHIG00000027081,SPART,PIP4K2A,EPC1,TMEM41B,RRP8,SLC1A2,CDC42BPA,AHCTF1,SLC7A11,PDGFC,DENR,RFC…
GO:BP	regulation of metabolic process	GO:0019222	1.75778e-33	32.755	4788	4434	1707	15439	KITLG,RIDA,CCT8,RABL3,ADIPOQ,DCUN1D1,EPC2,IKZF2,EPHA4,RHBDD1,KHDRBS1,IQGAP3,SYT11,PGLYRP3,ECM1,PSRC1,ELAPOR1,DR1,NFIA,DHCR24,TUT4,LURAP1,FIGNL1,MEOX2,HBP1,POT1,PRICKLE1,CNOT2,USP15,IGF1,NUAK1,KLRK1,CLEC7A,BBS7,LEF1,LAMTOR3,KLF3,SLC4A4,TNFAIP8,NR3C1,ARRDC3,ZBTB5,EBF2,NCOA7,GJA1,ATG5,TBPL1,BCLAF1,TTC5,ICE2,FGF7,PPP2R5E,PAIP2B,SOCS5,ENSCHIG00000018361,PIP4K2A,EPC1,ITCH,ENSCHIG00000024446,NCOA2,PKIA,…
GO:BP	developmental process	GO:0032502	2.16811e-33	32.6639	4000	4434	1464	15439	KITLG,CXCL10,ARL13B,RABL3,CLDN1,ADIPOQ,CLDN18,EPHA4,RHBDD1,MREG,IQGAP3,PGLYRP3,ECM1,CD53,COL11A1,NFIA,DHCR24,TUT4,FIGNL1,MEOX2,NAPEPLD,LRRC4,ANO6,PRICKLE1,CNOT2,IGF1,NUAK1,KLRK1,CLEC7A,NDNF,LEF1,SLC9B2,GABRA2,SULT1B1,ARRDC3,EBF2,ASPN,GJA1,ATG5,TBPL1,HOMER1,FGF7,BLOC1S6,SOCS5,SPART,RXFP2,PIP4K2A,ITCH,TGM2,HEY1,EHF,SLC1A2,EXO1,ENSCHIG00000016445,SLC10A7,SLC7A11,PDGFC,ATXN1L,CLIP3,RAP1GAP2,CHRNB1,MY…
GO:BP	cellular protein modification process	GO:0006464	1.03907e-32	31.9834	2953	4434	1130	15439	KITLG,RABL3,XXYLT1,ADIPOQ,DCUN1D1,NCEH1,TTC3,PPIG,EPHA4,RHBDD1,DHDDS,IQGAP3,PSRC1,DR1,ENSCHIG00000013246,FKBP14,PRICKLE1,USP15,IGF1,NUAK1,NDNF,LEF1,TBCK,LAMTOR3,PPM1K,MAPK10,ARRDC3,GALNTL6,CDC14C,NCOA7,CDK19,ATG5,PPIL4,HACD3,UBR1,FGF7,PPP2R5E,SOCS5,ENSCHIG00000012902,EPC1,OTUD1,ITCH,TGM2,PKIA,TRIM21,YOD1,CDC42BPA,TNFSF18,PDGFC,GTF2H3,CLIP3,PIGW,MYOCD,NMT1,ENC1,CARTPT,PIK3R1,ST8SIA2,BMP5,SRPK1,RNF…
GO:BP	protein modification process	GO:0036211	1.03907e-32	31.9834	2953	4434	1130	15439	KITLG,RABL3,XXYLT1,ADIPOQ,DCUN1D1,NCEH1,TTC3,PPIG,EPHA4,RHBDD1,DHDDS,IQGAP3,PSRC1,DR1,ENSCHIG00000013246,FKBP14,PRICKLE1,USP15,IGF1,NUAK1,NDNF,LEF1,TBCK,LAMTOR3,PPM1K,MAPK10,ARRDC3,GALNTL6,CDC14C,NCOA7,CDK19,ATG5,PPIL4,HACD3,UBR1,FGF7,PPP2R5E,SOCS5,ENSCHIG00000012902,EPC1,OTUD1,ITCH,TGM2,PKIA,TRIM21,YOD1,CDC42BPA,TNFSF18,PDGFC,GTF2H3,CLIP3,PIGW,MYOCD,NMT1,ENC1,CARTPT,PIK3R1,ST8SIA2,BMP5,SRPK1,RNF…
GO:BP	macromolecule modification	GO:0043412	3.74729e-32	31.4263	3107	4434	1177	15439	KITLG,RABL3,XXYLT1,ADIPOQ,DCUN1D1,NCEH1,TTC3,PPIG,EPHA4,RHBDD1,DHDDS,IQGAP3,PSRC1,DR1,ENSCHIG00000013246,FKBP14,PRICKLE1,USP15,IGF1,NUAK1,NDNF,LEF1,TBCK,LAMTOR3,TRMT10A,PPM1K,MAPK10,ARRDC3,GALNTL6,CDC14C,NCOA7,CDK19,ATG5,PPIL4,HACD3,UBR1,FGF7,PPP2R5E,SOCS5,ENSCHIG00000012902,EPC1,OTUD1,ITCH,TGM2,PKIA,TRIM21,YOD1,CDC42BPA,TNFSF18,PDGFC,GTF2H3,CLIP3,PIGW,MYOCD,NMT1,ENC1,CARTPT,PIK3R1,ST8SIA2,BMP5,S…
GO:BP	anatomical structure development	GO:0048856	8.08633e-32	31.0922	3722	4434	1370	15439	KITLG,CXCL10,ARL13B,RABL3,CLDN1,ADIPOQ,CLDN18,EPHA4,IQGAP3,PGLYRP3,ECM1,CD53,COL11A1,NFIA,DHCR24,TUT4,MEOX2,LRRC4,ANO6,PRICKLE1,CNOT2,IGF1,CLEC7A,NDNF,LEF1,SLC9B2,GABRA2,SULT1B1,ARRDC3,EBF2,ASPN,GJA1,ATG5,TBPL1,HOMER1,FGF7,BLOC1S6,SOCS5,SPART,RXFP2,PIP4K2A,ITCH,TGM2,HEY1,EHF,SLC1A2,EXO1,SLC10A7,SLC7A11,PDGFC,ATXN1L,RAP1GAP2,CHRNB1,MYOCD,RETREG3,NMT1,ENC1,PIK3R1,ADAMTS12,SSUH2,MITF,BMP5,TBCC,RIPOR…
GO:BP	regulation of macromolecule metabolic process	GO:0060255	1.44022e-31	30.8416	4465	4434	1599	15439	KITLG,RIDA,CCT8,RABL3,ADIPOQ,DCUN1D1,EPC2,IKZF2,EPHA4,RHBDD1,KHDRBS1,IQGAP3,SYT11,PGLYRP3,ECM1,PSRC1,DR1,NFIA,DHCR24,TUT4,LURAP1,FIGNL1,MEOX2,HBP1,POT1,PRICKLE1,CNOT2,USP15,IGF1,NUAK1,KLRK1,CLEC7A,BBS7,LEF1,LAMTOR3,KLF3,TNFAIP8,NR3C1,ARRDC3,ZBTB5,EBF2,NCOA7,GJA1,ATG5,TBPL1,BCLAF1,TTC5,ICE2,FGF7,PPP2R5E,PAIP2B,SOCS5,ENSCHIG00000018361,EPC1,ITCH,ENSCHIG00000024446,NCOA2,PKIA,HEY1,ABRA,ESRP1,RRP8,TR…
GO:BP	negative regulation of cellular process	GO:0048523	1.72266e-31	30.7638	3333	4434	1246	15439	KITLG,RIDA,CXCL10,ADIPOQ,CLDN18,EPHA4,RHBDD1,KHDRBS1,SYT11,PGLYRP3,ECM1,PSRC1,DR1,DHCR24,FIGNL1,MEOX2,POT1,PRICKLE1,CNOT2,IGF1,KLRK1,NDNF,LEF1,KLF3,TNFAIP8,NR3C1,G3BP1,GRIA1,ARRDC3,ZBTB5,ASPN,NCOA7,GJA1,ATG5,BCLAF1,CRHBP,UBR1,PAIP2B,SOCS5,ENSCHIG00000018361,SPART,EPC1,ITCH,ADNP,ENSCHIG00000024446,NCOA2,PKIA,HEY1,RRP8,TRIM21,YOD1,GPATCH2,CNST,SLC7A11,ATXN1L,CLIP3,RAP1GAP2,MYOCD,ENC1,PIK3R1,GZMA,AD…
GO:BP	negative regulation of biological process	GO:0048519	2.50304e-31	30.6015	3659	4434	1348	15439	KITLG,RIDA,CXCL10,ADIPOQ,CLDN18,EPHA4,RHBDD1,KHDRBS1,IQGAP3,SYT11,PGLYRP3,ECM1,PSRC1,DR1,DHCR24,TUT4,FIGNL1,MEOX2,POT1,PRICKLE1,CNOT2,IGF1,KLRK1,NDNF,LEF1,KLF3,TNFAIP8,NR3C1,G3BP1,GRIA1,ARRDC3,ZBTB5,ASPN,NCOA7,GJA1,ATG5,BCLAF1,NT5E,CRHBP,UBR1,PAIP2B,SOCS5,ENSCHIG00000018361,SPART,EPC1,ITCH,ADNP,ENSCHIG00000024446,NCOA2,PKIA,HEY1,RRP8,TRIM21,YOD1,GPATCH2,CNST,SLC7A11,ATXN1L,CLIP3,RAP1GAP2,MYOCD,EN…
GO:BP	regulation of cellular metabolic process	GO:0031323	3.19779e-31	30.4952	4350	4434	1562	15439	KITLG,RIDA,CCT8,RABL3,ADIPOQ,DCUN1D1,EPC2,IKZF2,EPHA4,RHBDD1,KHDRBS1,IQGAP3,ECM1,PSRC1,ELAPOR1,DR1,NFIA,DHCR24,TUT4,FIGNL1,MEOX2,HBP1,POT1,PRICKLE1,CNOT2,IGF1,NUAK1,KLRK1,CLEC7A,BBS7,LEF1,LAMTOR3,KLF3,SLC4A4,TNFAIP8,NR3C1,ARRDC3,ZBTB5,EBF2,NCOA7,ATG5,TBPL1,BCLAF1,TTC5,ICE2,FGF7,PPP2R5E,PAIP2B,SOCS5,ENSCHIG00000018361,PIP4K2A,EPC1,ITCH,ENSCHIG00000024446,NCOA2,PKIA,HEY1,ABRA,ESRP1,RRP8,TRIM21,EHF,…
GO:BP	cellular component organization or biogenesis	GO:0071840	2.98396e-30	29.5252	4190	4434	1508	15439	CXCL10,CCT8,ARL13B,CLDN1,MAIP1,ABI2,EPHA4,STX12,MREG,IQGAP3,SYT11,ANP32E,CD53,PSRC1,ELAPOR1,DR1,NFIA,DHCR24,FIGNL1,POT1,LRRC4,CEP41,ANO6,CNOT2,USP15,GAS2L3,IGF1,CLEC7A,BBS7,NDNF,LEF1,TBCK,NCAPG,TMEM33,GABRA2,SLAIN2,NR3C1,G3BP1,SLU7,STX17,CLVS2,GJA1,AFG1L,ATG5,TBPL1,MTRF1L,FGF7,BLOC1S6,DAAM1,GCC2,CEP68,ENSCHIG00000027081,SPART,PIP4K2A,EPC1,TMEM41B,RRP8,SLC1A2,CDC42BPA,AHCTF1,SLC7A11,PDGFC,DENR,RFC…
GO:BP	regulation of primary metabolic process	GO:0080090	1.48471e-28	27.8284	4201	4434	1503	15439	KITLG,RIDA,CCT8,RABL3,ADIPOQ,DCUN1D1,EPC2,IKZF2,EPHA4,RHBDD1,KHDRBS1,IQGAP3,ECM1,PSRC1,DR1,NFIA,DHCR24,TUT4,FIGNL1,MEOX2,HBP1,POT1,PRICKLE1,CNOT2,IGF1,NUAK1,CLEC7A,BBS7,LEF1,LAMTOR3,KLF3,SLC4A4,TNFAIP8,NR3C1,ARRDC3,ZBTB5,EBF2,NCOA7,ATG5,TBPL1,BCLAF1,TTC5,ICE2,FGF7,PPP2R5E,PAIP2B,SOCS5,ENSCHIG00000018361,EPC1,ITCH,ENSCHIG00000024446,NCOA2,PKIA,HEY1,ABRA,ESRP1,RRP8,TRIM21,EHF,YOD1,AHCTF1,TNFSF18,SL…
GO:BP	multicellular organism development	GO:0007275	2.98026e-28	27.5257	3361	4434	1240	15439	KITLG,CXCL10,ARL13B,RABL3,CLDN1,ADIPOQ,CLDN18,EPHA4,IQGAP3,PGLYRP3,ECM1,COL11A1,NFIA,DHCR24,MEOX2,LRRC4,ANO6,PRICKLE1,CNOT2,IGF1,NDNF,LEF1,SLC9B2,GABRA2,ARRDC3,EBF2,ASPN,GJA1,ATG5,HOMER1,FGF7,BLOC1S6,SOCS5,SPART,RXFP2,PIP4K2A,ITCH,TGM2,HEY1,SLC1A2,EXO1,SLC10A7,SLC7A11,PDGFC,ATXN1L,RAP1GAP2,MYOCD,RETREG3,NMT1,ENC1,PIK3R1,ADAMTS12,SSUH2,MITF,BMP5,RIPOR2,VAPA,ONECUT2,RRN3,PRKG1,ENSCHIG00000006638,KI…
GO:BP	system development	GO:0048731	3.43632e-28	27.4639	3087	4434	1153	15439	KITLG,CXCL10,ARL13B,RABL3,CLDN1,ADIPOQ,CLDN18,EPHA4,IQGAP3,PGLYRP3,ECM1,NFIA,DHCR24,MEOX2,LRRC4,ANO6,PRICKLE1,IGF1,NDNF,LEF1,SLC9B2,GABRA2,ARRDC3,EBF2,ASPN,GJA1,ATG5,HOMER1,FGF7,BLOC1S6,SOCS5,SPART,RXFP2,PIP4K2A,ITCH,TGM2,HEY1,SLC1A2,EXO1,SLC10A7,SLC7A11,PDGFC,ATXN1L,RAP1GAP2,MYOCD,RETREG3,ENC1,PIK3R1,ADAMTS12,SSUH2,MITF,BMP5,RIPOR2,VAPA,ONECUT2,PRKG1,ENSCHIG00000006638,KIF20B,INPP5F,PDLIM3,LRRTM…
GO:BP	regulation of nitrogen compound metabolic process	GO:0051171	4.50251e-28	27.3465	4105	4434	1471	15439	KITLG,RIDA,CCT8,RABL3,ADIPOQ,DCUN1D1,EPC2,IKZF2,EPHA4,RHBDD1,KHDRBS1,IQGAP3,ECM1,PSRC1,DR1,NFIA,DHCR24,TUT4,FIGNL1,MEOX2,HBP1,POT1,PRICKLE1,CNOT2,IGF1,NUAK1,KLRK1,CLEC7A,BBS7,LEF1,LAMTOR3,KLF3,SLC4A4,TNFAIP8,NR3C1,ARRDC3,ZBTB5,EBF2,NCOA7,ATG5,TBPL1,BCLAF1,TTC5,ICE2,FGF7,PPP2R5E,PAIP2B,SOCS5,ENSCHIG00000018361,EPC1,ITCH,ENSCHIG00000024446,NCOA2,PKIA,HEY1,ABRA,ESRP1,RRP8,TRIM21,EHF,YOD1,AHCTF1,TNFS…
GO:BP	positive regulation of metabolic process	GO:0009893	4.01981e-25	24.3958	2621	4434	990	15439	KITLG,RIDA,CCT8,ADIPOQ,DCUN1D1,IKZF2,EPHA4,RHBDD1,KHDRBS1,IQGAP3,PSRC1,ELAPOR1,NFIA,TUT4,LURAP1,MEOX2,POT1,PRICKLE1,USP15,IGF1,KLRK1,CLEC7A,BBS7,LEF1,LAMTOR3,SLC4A4,NR3C1,ARRDC3,EBF2,NCOA7,GJA1,ATG5,TBPL1,BCLAF1,TTC5,ICE2,FGF7,SOCS5,PIP4K2A,EPC1,ITCH,NCOA2,ABRA,TRIM21,EHF,TNFSF18,PDGFC,RFC5,CLIP3,MYOCD,CARTPT,PIK3R1,MITF,BMP5,ENSCHIG00000008358,ONECUT2,RRN3,RNF40,INPP5F,LRRTM3,TSPYL5,HGF,SLC30A9,…
GO:BP	cellular developmental process	GO:0048869	7.02429e-25	24.1534	2612	4434	986	15439	KITLG,CXCL10,ARL13B,RABL3,ADIPOQ,CLDN18,EPHA4,RHBDD1,MREG,PGLYRP3,ECM1,CD53,COL11A1,TUT4,FIGNL1,NAPEPLD,PRICKLE1,CNOT2,IGF1,NUAK1,KLRK1,CLEC7A,NDNF,LEF1,SLC9B2,SULT1B1,EBF2,GJA1,ATG5,TBPL1,HOMER1,BLOC1S6,SOCS5,SPART,PIP4K2A,HEY1,EHF,ENSCHIG00000016445,CLIP3,RAP1GAP2,CHRNB1,MYOCD,RETREG3,PIK3R1,ADAMTS12,ZNF445,MITF,BMP5,RIPOR2,VAPA,ONECUT2,PRKG1,KIF20B,INPP5F,CFTR,PAQR3,GNRH1,ADRA2B,TMEM64,SFRP2,A…
GO:BP	positive regulation of cellular metabolic process	GO:0031325	5.75332e-24	23.2401	2306	4434	883	15439	KITLG,RIDA,CCT8,ADIPOQ,DCUN1D1,IKZF2,EPHA4,RHBDD1,KHDRBS1,IQGAP3,PSRC1,ELAPOR1,NFIA,MEOX2,POT1,PRICKLE1,IGF1,KLRK1,CLEC7A,BBS7,LEF1,LAMTOR3,SLC4A4,NR3C1,ARRDC3,EBF2,NCOA7,ATG5,TBPL1,BCLAF1,TTC5,ICE2,FGF7,SOCS5,PIP4K2A,EPC1,ITCH,NCOA2,ABRA,TRIM21,EHF,TNFSF18,PDGFC,RFC5,CLIP3,MYOCD,CARTPT,PIK3R1,MITF,BMP5,ENSCHIG00000008358,ONECUT2,RRN3,RNF40,INPP5F,LRRTM3,TSPYL5,HGF,SLC30A9,ADRA2B,SFRP2,LCP2,PRLR,…
GO:BP	biological regulation	GO:0065007	5.77467e-24	23.2385	9473	4434	3013	15439	CD36,KITLG,RIDA,CXCL10,OPRK1,CCT8,ARL13B,ATP6V1A,RABL3,CLDN1,MASP1,ADIPOQ,DCUN1D1,NCEH1,CLDN18,RAPGEF4,EPC2,CXCR4,DPP10,MAIP1,IKZF2,EPHA4,RHBDD1,KHDRBS1,STX12,IQGAP3,SYT11,PGLYRP3,ECM1,ANP32E,CD53,PSRC1,ELAPOR1,DR1,NFIA,DHCR24,TUT4,TM2D1,LURAP1,FIGNL1,MEOX2,NAPEPLD,HBP1,POT1,LRRC4,ANO6,PRICKLE1,CNOT2,USP15,IGF1,NUAK1,ABCC9,KLRK1,CLEC7A,BBS7,NDNF,LEF1,TBCK,SLC9B2,LAMTOR3,RAP1GDS1,ARAP2,KLF3,TMEM33…
GO:BP	cell differentiation	GO:0030154	8.57166e-24	23.0669	2556	4434	963	15439	KITLG,CXCL10,ARL13B,RABL3,ADIPOQ,CLDN18,EPHA4,RHBDD1,MREG,PGLYRP3,ECM1,CD53,COL11A1,TUT4,FIGNL1,NAPEPLD,PRICKLE1,CNOT2,IGF1,KLRK1,CLEC7A,NDNF,LEF1,SLC9B2,SULT1B1,EBF2,GJA1,ATG5,TBPL1,HOMER1,BLOC1S6,SOCS5,SPART,PIP4K2A,HEY1,EHF,ENSCHIG00000016445,CLIP3,RAP1GAP2,CHRNB1,MYOCD,RETREG3,PIK3R1,ADAMTS12,ZNF445,MITF,BMP5,RIPOR2,VAPA,ONECUT2,PRKG1,KIF20B,INPP5F,CFTR,PAQR3,GNRH1,ADRA2B,TMEM64,SFRP2,ATP2B2,…
GO:BP	localization	GO:0051179	1.00715e-23	22.9969	4556	4434	1586	15439	KITLG,CXCL10,OPRK1,CCT8,ARL13B,SLC35A5,ATP6V1A,CLDN1,ADIPOQ,ENSCHIG00000020065,CLDN18,RAPGEF4,DPP10,MAIP1,RHBDD1,KHDRBS1,STX12,MREG,SYT11,ECM1,VPS45,PSRC1,DHCR24,MEOX2,POT1,LRRC4,ANO6,PRICKLE1,IGF1,ABCC9,KLRK1,CLEC7A,BBS7,NDNF,LEF1,SLC9B2,LAMTOR3,GABRG1,GABRA2,SLC4A4,SLC10A6,GM2A,GRIA1,SLU7,GABRA6,MFSD14B,STX17,XPO7,GJA1,ATG5,ENSCHIG00000022022,SLC22A2,CRHBP,HOMER1,SLC7A7,TMEM87A,FGF7,BLOC1S6,GCC…
GO:BP	regulation of multicellular organismal process	GO:0051239	6.41015e-23	22.1931	2136	4434	823	15439	KITLG,CXCL10,OPRK1,ADIPOQ,CLDN18,EPHA4,IQGAP3,SYT11,PGLYRP3,ECM1,TUT4,LURAP1,MEOX2,ANO6,PRICKLE1,CNOT2,USP15,IGF1,ABCC9,KLRK1,CLEC7A,NDNF,LEF1,SLC9B2,ARRDC3,EBF2,ASPN,GJA1,ATG5,CRHBP,HOMER1,FGF7,SOCS5,SPART,CACNB2,ITCH,ATP1B1,PDGFC,ATXN1L,RAP1GAP2,MYOCD,RETREG3,CARTPT,PIK3R1,NUP155,ADAMTS12,MITF,BMP5,ENSCHIG00000008358,APOM,PRKG1,KIF20B,INPP5F,LRRTM3,HGF,PAQR3,ADGRL1,GNRH1,ADRA2B,TMEM64,SFRP2,MRT…
GO:BP	regulation of gene expression	GO:0010468	6.94594e-23	22.1583	3321	4434	1201	15439	RIDA,ADIPOQ,EPC2,IKZF2,RHBDD1,KHDRBS1,IQGAP3,SYT11,PGLYRP3,ECM1,PSRC1,DR1,NFIA,TUT4,LURAP1,MEOX2,HBP1,PRICKLE1,CNOT2,USP15,IGF1,KLRK1,CLEC7A,BBS7,LEF1,KLF3,NR3C1,ZBTB5,EBF2,NCOA7,GJA1,ATG5,TBPL1,BCLAF1,TTC5,ICE2,FGF7,PAIP2B,SOCS5,ENSCHIG00000018361,EPC1,ITCH,NCOA2,HEY1,ABRA,ESRP1,RRP8,TRIM21,EHF,AHCTF1,ATP1B1,GTF2H3,SBNO1,ZFP1,ATXN1L,ZFP30,ENSCHIG00000017808,MYOCD,MBTD1,ENC1,PIK3R1,ZNF445,MITF,PD…
GO:BP	positive regulation of macromolecule metabolic process	GO:0010604	7.04957e-22	21.1518	2447	4434	919	15439	KITLG,RIDA,CCT8,ADIPOQ,DCUN1D1,IKZF2,EPHA4,RHBDD1,KHDRBS1,IQGAP3,PSRC1,NFIA,TUT4,LURAP1,MEOX2,POT1,PRICKLE1,USP15,IGF1,KLRK1,CLEC7A,BBS7,LEF1,LAMTOR3,NR3C1,ARRDC3,EBF2,NCOA7,GJA1,TBPL1,BCLAF1,TTC5,ICE2,FGF7,SOCS5,EPC1,ITCH,NCOA2,ABRA,EHF,TNFSF18,PDGFC,RFC5,CLIP3,MYOCD,CARTPT,PIK3R1,MITF,BMP5,ENSCHIG00000008358,ONECUT2,RRN3,RNF40,INPP5F,LRRTM3,TSPYL5,HGF,SLC30A9,APC,ADRA2B,ANGEL2,SFRP2,LCP2,PRLR,S…
GO:BP	regulation of signaling	GO:0023051	4.8152e-21	20.3174	2239	4434	848	15439	KITLG,RABL3,ADIPOQ,CXCR4,EPHA4,IQGAP3,SYT11,ECM1,TUT4,LURAP1,FIGNL1,LRRC4,PRICKLE1,CNOT2,USP15,IGF1,LEF1,TBCK,SLC9B2,LAMTOR3,TMEM33,G3BP1,GRIA1,ARRDC3,ASPN,GJA1,BCLAF1,CRHBP,HOMER1,UBR1,SOCS5,SPART,CACNB2,ITCH,HEY1,ABRA,TNFSF18,SLC7A11,RAP1GAP2,MYOCD,MPP2,CARTPT,PIK3R1,ADAMTS12,BMP5,TMEM14A,RIPOR2,ELP2,ONECUT2,RRN3,INPP5F,GPR137B,DDIAS,TSPYL5,TRIM25,HGF,CFTR,PAQR3,APC,ADRA2B,TMEM64,LYPD1,SFRP2,PR…
GO:BP	positive regulation of nitrogen compound metabolic process	GO:0051173	5.9492e-21	20.2255	2194	4434	833	15439	KITLG,RIDA,CCT8,ADIPOQ,DCUN1D1,IKZF2,EPHA4,RHBDD1,KHDRBS1,IQGAP3,PSRC1,NFIA,MEOX2,POT1,PRICKLE1,IGF1,KLRK1,CLEC7A,BBS7,LEF1,LAMTOR3,SLC4A4,NR3C1,ARRDC3,EBF2,NCOA7,TBPL1,BCLAF1,TTC5,ICE2,FGF7,SOCS5,EPC1,ITCH,NCOA2,ABRA,EHF,TNFSF18,PDGFC,RFC5,CLIP3,MYOCD,CARTPT,PIK3R1,MITF,BMP5,ENSCHIG00000008358,ONECUT2,RRN3,RNF40,LRRTM3,TSPYL5,HGF,SLC30A9,APC,ADRA2B,SFRP2,LCP2,PRLR,SMCHD1,MRTFB,CACUL1,RYBP,PPARD,…
GO:BP	nervous system development	GO:0007399	6.08011e-21	20.2161	1414	4434	575	15439	ARL13B,EPHA4,NFIA,LRRC4,PRICKLE1,NDNF,LEF1,GABRA2,BLOC1S6,SPART,SLC1A2,SLC7A11,ATXN1L,RAP1GAP2,RETREG3,ENC1,BMP5,RIPOR2,VAPA,ONECUT2,PRKG1,ENSCHIG00000006638,KIF20B,INPP5F,LRRTM3,PAQR3,ADGRL1,GNRH1,ADRA2B,SFRP2,TMEM107,ATP2B2,LRRN1,DDR1,PPARD,ZNF521,EPB41L3,TRAF3IP1,GFRA1,HOOK3,ANK3,SHANK2,DOCK7,GLMN,HIPK1,LHX8,BRAF,RAB21,SYT1,SCYL2,RBPJ,APBB2,GABRB2,CYFIP2,PURA,JADE2,C9ORF72,PLAA,VLDLR,VPS13A,RE…
GO:BP	anatomical structure morphogenesis	GO:0009653	1.01597e-20	19.9931	1830	4434	713	15439	CXCL10,ARL13B,ADIPOQ,EPHA4,ECM1,CD53,COL11A1,MEOX2,PRICKLE1,CNOT2,NDNF,LEF1,ASPN,GJA1,TBPL1,FGF7,SPART,TGM2,HEY1,PDGFC,MYOCD,ADAMTS12,SSUH2,TBCC,RIPOR2,ONECUT2,KIF20B,HGF,SFRP2,TMEM107,DDR1,FOXF2,GREB1L,MYL12B,EPB41L3,TRAF3IP1,ACKR3,LZTS2,POLB,ANK3,MCU,ETS1,DOCK7,GLMN,F3,HIPK1,LHX8,BRAF,SP1,RAB21,SYT1,EPS8,CACNA1C,ATF4,RBPJ,APBB2,CYFIP2,JADE2,C9ORF72,PLAA,VLDLR,GCNT1,RECK,CD109,PHIP,FYN,ENSCHIG00…
GO:BP	regulation of biological process	GO:0050789	1.13856e-20	19.9436	8973	4434	2854	15439	CD36,KITLG,RIDA,CXCL10,OPRK1,CCT8,ARL13B,RABL3,CLDN1,MASP1,ADIPOQ,DCUN1D1,NCEH1,CLDN18,RAPGEF4,EPC2,CXCR4,DPP10,IKZF2,EPHA4,RHBDD1,KHDRBS1,IQGAP3,SYT11,PGLYRP3,ECM1,CD53,PSRC1,ELAPOR1,DR1,NFIA,DHCR24,TUT4,TM2D1,LURAP1,FIGNL1,MEOX2,NAPEPLD,HBP1,POT1,LRRC4,ANO6,PRICKLE1,CNOT2,USP15,IGF1,NUAK1,ABCC9,KLRK1,CLEC7A,BBS7,NDNF,LEF1,TBCK,SLC9B2,LAMTOR3,ARAP2,KLF3,TMEM33,GABRG1,GABRA2,SLAIN2,SLC4A4,CCNG2,A…
GO:BP	cellular localization	GO:0051641	1.33043e-20	19.876	1777	4434	695	15439	CXCL10,CCT8,ADIPOQ,CLDN18,RAPGEF4,DPP10,MAIP1,RHBDD1,KHDRBS1,STX12,MREG,SYT11,VPS45,PSRC1,POT1,LRRC4,PRICKLE1,SLC9B2,LAMTOR3,SLU7,STX17,XPO7,GJA1,ATG5,SLC22A2,TMEM87A,FGF7,BLOC1S6,GCC2,CEP68,ARL5B,GPR158,CACNB2,ABRA,YOD1,CNST,ATP1B1,SLC7A11,CLIP3,PIGW,ENSCHIG00000023339,PIK3R1,NUP155,SLMAP,RIPOR2,VAPA,KIF20B,VTI1A,INPP5F,SEC23IP,GPR137B,WAPL,CFTR,PAQR3,APC,LYPD1,APPBP2,TMEM107,SNX18,NUP153,ATXN1,…
GO:BP	regulation of cell communication	GO:0010646	1.65138e-20	19.7822	2222	4434	840	15439	KITLG,RABL3,ADIPOQ,CXCR4,EPHA4,IQGAP3,SYT11,ECM1,TUT4,LURAP1,FIGNL1,LRRC4,PRICKLE1,CNOT2,USP15,IGF1,LEF1,TBCK,SLC9B2,LAMTOR3,TMEM33,G3BP1,GRIA1,ARRDC3,ASPN,GJA1,BCLAF1,CRHBP,HOMER1,UBR1,SOCS5,SPART,CACNB2,ITCH,HEY1,ABRA,TNFSF18,SLC7A11,RAP1GAP2,MYOCD,MPP2,CARTPT,PIK3R1,ADAMTS12,BMP5,TMEM14A,RIPOR2,ELP2,ONECUT2,RRN3,INPP5F,GPR137B,DDIAS,TSPYL5,TRIM25,HGF,CFTR,PAQR3,APC,ADRA2B,TMEM64,LYPD1,SFRP2,PR…
GO:BP	regulation of developmental process	GO:0050793	6.55215e-20	19.1836	1780	4434	693	15439	KITLG,CXCL10,ADIPOQ,CLDN18,EPHA4,IQGAP3,PGLYRP3,ECM1,CD53,MEOX2,NAPEPLD,ANO6,PRICKLE1,CNOT2,IGF1,NUAK1,CLEC7A,NDNF,LEF1,SLC9B2,ASPN,GJA1,FGF7,SOCS5,SPART,ITCH,ATXN1L,RAP1GAP2,MYOCD,RETREG3,PIK3R1,ADAMTS12,ZNF445,MITF,BMP5,RIPOR2,KIF20B,INPP5F,LRRTM3,HGF,PAQR3,ADGRL1,GNRH1,ADRA2B,TMEM64,SFRP2,MRTFB,LRRN1,PPARD,RBM24,MYL12B,EPB41L3,TRAF3IP1,HOOK3,IKBKB,MCU,ETS1,KMT5B,F3,BRAF,SP1,RAB21,SYT1,DUSP6,TI…
GO:BP	regulation of cellular process	GO:0050794	1.678e-19	18.7752	8587	4434	2738	15439	CD36,KITLG,RIDA,CXCL10,OPRK1,CCT8,ARL13B,RABL3,CLDN1,ADIPOQ,DCUN1D1,NCEH1,CLDN18,RAPGEF4,EPC2,CXCR4,DPP10,IKZF2,EPHA4,RHBDD1,KHDRBS1,IQGAP3,SYT11,PGLYRP3,ECM1,CD53,PSRC1,ELAPOR1,DR1,NFIA,DHCR24,TUT4,TM2D1,LURAP1,FIGNL1,MEOX2,NAPEPLD,HBP1,POT1,LRRC4,ANO6,PRICKLE1,CNOT2,USP15,IGF1,NUAK1,KLRK1,CLEC7A,BBS7,NDNF,LEF1,TBCK,SLC9B2,LAMTOR3,ARAP2,KLF3,TMEM33,GABRG1,GABRA2,SLAIN2,SLC4A4,CCNG2,ARHGAP24,MAPK…
GO:BP	macromolecule localization	GO:0033036	2.87e-19	18.5421	1935	4434	741	15439	CCT8,ADIPOQ,CLDN18,RAPGEF4,DPP10,MAIP1,RHBDD1,KHDRBS1,STX12,SYT11,VPS45,DHCR24,POT1,LRRC4,ANO6,PRICKLE1,IGF1,BBS7,SLC9B2,LAMTOR3,GM2A,SLU7,STX17,XPO7,GJA1,ENSCHIG00000022022,FGF7,BLOC1S6,GCC2,CEP68,ARL5B,GPR158,ABRA,TIMM8B,YOD1,CNST,ATP1B1,SLC10A7,SLC7A11,SNX20,CLIP3,PIGW,ENSCHIG00000023339,PIK3R1,NUP155,SLMAP,APOM,RIPOR2,VAPA,KIF20B,VTI1A,GPR137B,WAPL,CFTR,ENSCHIG00000021672,ENSCHIG00000025589,P…
GO:BP	cell development	GO:0048468	2.98039e-19	18.5257	1413	4434	568	15439	KITLG,ARL13B,ADIPOQ,CLDN18,EPHA4,ECM1,TUT4,IGF1,CLEC7A,NDNF,LEF1,SLC9B2,ATG5,TBPL1,HOMER1,BLOC1S6,SPART,PIP4K2A,RAP1GAP2,CHRNB1,RETREG3,BMP5,RIPOR2,VAPA,ONECUT2,PRKG1,KIF20B,INPP5F,CFTR,PAQR3,GNRH1,ADRA2B,SFRP2,DDR1,EPB41L3,MARF1,HOOK3,IKBKB,ANK3,HOOK1,DOCK7,LHX8,BRAF,RAB21,SYT1,SCYL2,ATF4,APBB2,GABRB2,CYFIP2,JADE2,AFF4,C9ORF72,PLAA,VLDLR,RECK,FYN,ENSCHIG00000018293,UBE2J1,ARID1B,QKI,HIF1A,NIN,TY…
GO:BP	cellular response to chemical stimulus	GO:0070887	1.00245e-18	17.9989	1912	4434	731	15439	CXCL10,ATP6V1A,ADIPOQ,NCEH1,CLDN18,CXCR4,EPHA4,RHBDD1,IQGAP3,ECM1,TUT4,ANO6,CNOT2,USP15,IGF1,KLRK1,NDNF,LEF1,SLC9B2,LAMTOR3,TMEM33,SULT1B1,NR3C1,ASPN,NCOA7,ATG5,BCLAF1,CRHBP,UBR1,FGF7,SOCS5,SPART,NCOA2,YOD1,FMO2,TNFSF18,SLC7A11,PDGFC,CCL17,MYOCD,PIK3R1,ADAMTS12,PDE12,GSTA4,APOM,RIPOR2,ONECUT2,LCOR,TRIM25,HGF,CFTR,KLF9,APC,SRXN1,LYPD1,SFRP2,HCN1,PRLR,PTAFR,PPARD,GLP1R,COLEC12,GAREM1,RABGEF1,ACKR3,…
GO:BP	protein localization	GO:0008104	1.11578e-18	17.9524	1663	4434	649	15439	CCT8,ADIPOQ,CLDN18,RAPGEF4,DPP10,MAIP1,RHBDD1,STX12,SYT11,VPS45,DHCR24,POT1,LRRC4,PRICKLE1,IGF1,BBS7,SLC9B2,LAMTOR3,SLU7,STX17,XPO7,GJA1,ENSCHIG00000022022,FGF7,BLOC1S6,GCC2,CEP68,ARL5B,GPR158,ABRA,TIMM8B,YOD1,CNST,ATP1B1,SLC10A7,SLC7A11,SNX20,CLIP3,PIGW,ENSCHIG00000023339,PIK3R1,NUP155,SLMAP,RIPOR2,VAPA,KIF20B,VTI1A,GPR137B,WAPL,CFTR,ENSCHIG00000021672,PAQR3,APC,LYPD1,APPBP2,TMEM107,LCP2,SNX18,E…
GO:BP	negative regulation of macromolecule metabolic process	GO:0010605	1.23098e-18	17.9097	1947	4434	742	15439	RIDA,ADIPOQ,EPHA4,KHDRBS1,IQGAP3,SYT11,PGLYRP3,ECM1,DR1,DHCR24,TUT4,POT1,PRICKLE1,CNOT2,IGF1,LEF1,KLF3,TNFAIP8,NR3C1,ZBTB5,NCOA7,ATG5,BCLAF1,PAIP2B,SOCS5,ENSCHIG00000018361,EPC1,ITCH,ENSCHIG00000024446,NCOA2,PKIA,HEY1,RRP8,TRIM21,YOD1,ATXN1L,MYOCD,ENC1,GZMA,MITF,PDE12,RNF40,LCOR,INPP5F,WAPL,MIER1,HGF,PAQR3,CAMLG,APC,ANGEL2,SFRP2,SMCHD1,RYBP,ATXN1,ILRUN,CD2AP,PPARD,RBM24,FOXF2,RNF125,TRAF3IP1,SMG1…
GO:BP	cellular macromolecule metabolic process	GO:0044260	1.72623e-18	17.7629	6404	4434	2104	15439	KITLG,RIDA,CCT8,RABL3,XXYLT1,ADIPOQ,DCUN1D1,NCEH1,TTC3,PPIG,EPC2,ORC4,ORC2,IKZF2,EPHA4,RHBDD1,KHDRBS1,DHDDS,IQGAP3,ECM1,PSRC1,DR1,ENSCHIG00000013246,NFIA,DHCR24,TUT4,FIGNL1,MEOX2,TWISTNB,HBP1,FKBP14,POT1,PRICKLE1,CNOT2,USP15,IGF1,NUAK1,YARS2,CLEC7A,BBS7,NDNF,LEF1,TBCK,LAMTOR3,TRMT10A,PPM1K,KLF3,THAP9,MAPK10,TNFAIP8,NR3C1,GRIA1,ARRDC3,GALNTL6,ZBTB5,EBF2,CDC14C,IARS1,ENSCHIG00000010087,NCOA7,CDK19,…
GO:BP	regulation of response to stimulus	GO:0048583	1.02281e-17	16.9902	2578	4434	940	15439	KITLG,CXCL10,RABL3,CLDN1,MASP1,ADIPOQ,CXCR4,EPHA4,KHDRBS1,IQGAP3,SYT11,PGLYRP3,ECM1,TUT4,LURAP1,FIGNL1,NAPEPLD,POT1,ANO6,PRICKLE1,CNOT2,USP15,IGF1,NUAK1,KLRK1,CLEC7A,LEF1,TBCK,SLC9B2,LAMTOR3,TMEM33,G3BP1,ARRDC3,ASPN,NCOA7,ATG5,BCLAF1,NT5E,CRHBP,HOMER1,UBR1,SOCS5,SPART,ITCH,HEY1,ABRA,YOD1,TNFSF18,SLC7A11,RAP1GAP2,MYOCD,CARTPT,PIK3R1,ADAMTS12,BMP5,ENSCHIG00000008358,TMEM14A,RIPOR2,ELP2,ONECUT2,RRN3…
GO:BP	regulation of multicellular organismal development	GO:2000026	1.79572e-17	16.7458	1390	4434	553	15439	KITLG,CXCL10,ADIPOQ,CLDN18,EPHA4,IQGAP3,PGLYRP3,ECM1,MEOX2,ANO6,PRICKLE1,IGF1,NDNF,LEF1,SLC9B2,ASPN,GJA1,FGF7,SOCS5,SPART,ITCH,ATXN1L,RAP1GAP2,MYOCD,RETREG3,PIK3R1,ADAMTS12,MITF,BMP5,KIF20B,INPP5F,LRRTM3,HGF,PAQR3,ADGRL1,GNRH1,ADRA2B,TMEM64,SFRP2,MRTFB,LRRN1,PPARD,RBM24,TRAF3IP1,HOOK3,IKBKB,ETS1,KMT5B,F3,BRAF,SP1,RAB21,SYT1,DUSP6,TIAM1,ATF4,RBPJ,BMP2K,JADE2,RAB14,PLAA,VLDLR,RECK,CD109,FYN,HIF1A,N…
GO:BP	cellular response to organic substance	GO:0071310	3.17869e-17	16.4978	1483	4434	583	15439	CXCL10,ADIPOQ,CLDN18,CXCR4,EPHA4,RHBDD1,IQGAP3,ECM1,TUT4,CNOT2,USP15,IGF1,KLRK1,LEF1,SLC9B2,LAMTOR3,TMEM33,NR3C1,ASPN,BCLAF1,CRHBP,UBR1,FGF7,SOCS5,SPART,YOD1,TNFSF18,PDGFC,MYOCD,PIK3R1,ADAMTS12,PDE12,RIPOR2,ONECUT2,LCOR,TRIM25,HGF,CFTR,KLF9,APC,SFRP2,HCN1,PRLR,PTAFR,GLP1R,COLEC12,GAREM1,RABGEF1,ACKR3,RAB11FIP2,CPEB3,CCDC186,IKBKB,HIPK1,IFNAR1,CACNA2D1,ENSCHIG00000008899,NFYB,C2CD5,LMO3,EPS8,ATF4,…
GO:BP	regulation of localization	GO:0032879	5.30736e-17	16.2751	1814	4434	691	15439	KITLG,CXCL10,OPRK1,CCT8,CLDN1,ADIPOQ,CLDN18,RAPGEF4,DPP10,KHDRBS1,SYT11,ECM1,MEOX2,ANO6,IGF1,KLRK1,CLEC7A,LEF1,SLC9B2,GJA1,ATG5,CRHBP,HOMER1,FGF7,GCC2,CACNB2,SLC1A2,YOD1,CNST,ATP1B1,TNFSF18,SLC7A11,CLIP3,MYOCD,CARTPT,PIK3R1,MITF,SLMAP,TMEM14A,RIPOR2,RAB27B,ONECUT2,PRKG1,KIF20B,INPP5F,GPR137B,WAPL,HGF,CFTR,GNRH1,APC,LYPD1,SFRP2,TTLL6,KCNJ16,NUP153,ILRUN,CD2AP,VPS4B,DSG2,RABGEF1,CHP2,LZTS2,ANK3,MCU…
GO:BP	negative regulation of metabolic process	GO:0009892	1.2068e-16	15.9184	2119	4434	788	15439	RIDA,ADIPOQ,EPHA4,KHDRBS1,IQGAP3,SYT11,PGLYRP3,ECM1,DR1,DHCR24,TUT4,POT1,PRICKLE1,CNOT2,IGF1,LEF1,KLF3,TNFAIP8,NR3C1,ARRDC3,ZBTB5,NCOA7,ATG5,BCLAF1,PAIP2B,SOCS5,ENSCHIG00000018361,EPC1,ITCH,ENSCHIG00000024446,NCOA2,PKIA,HEY1,RRP8,TRIM21,YOD1,GPATCH2,CNST,ATXN1L,MYOCD,ENC1,GZMA,MITF,PDE12,BMP5,RNF40,LCOR,INPP5F,WAPL,MIER1,HGF,PAQR3,CAMLG,APC,ANGEL2,SFRP2,SMCHD1,RYBP,ATXN1,ILRUN,CD2AP,PPARD,RBM24,F…
GO:BP	neurogenesis	GO:0022008	1.4924e-16	15.8261	1041	4434	431	15439	EPHA4,NDNF,LEF1,BLOC1S6,SPART,RAP1GAP2,RETREG3,BMP5,RIPOR2,VAPA,ONECUT2,PRKG1,KIF20B,INPP5F,PAQR3,GNRH1,ADRA2B,SFRP2,ATP2B2,DDR1,ZNF521,EPB41L3,HOOK3,ANK3,DOCK7,HIPK1,LHX8,BRAF,RAB21,SYT1,SCYL2,RBPJ,APBB2,GABRB2,CYFIP2,JADE2,C9ORF72,PLAA,VLDLR,FYN,ARID1B,HIF1A,NIN,PAX7,TRPC4,ABI1,YTHDF1,MATN2,LRP12,VXN,LYN,RIMS1,WEE1,DDX6,YAP1,MARK1,PRDM16,PTPN11,ARHGAP35,BAIAP2,MMD,CRK,PAFAH1B1,ERCC3,DAG1,FN1,UH…
GO:BP	regulation of cellular component organization	GO:0051128	2.26405e-16	15.6451	1588	4434	614	15439	CXCL10,CCT8,EPHA4,SYT11,CD53,PSRC1,ELAPOR1,POT1,ANO6,CNOT2,IGF1,CLEC7A,NDNF,LEF1,TMEM33,SLAIN2,G3BP1,ATG5,SPART,PIP4K2A,SLC7A11,CLIP3,RAP1GAP2,MYOCD,RETREG3,ANKRA2,PIK3R1,BMP5,TMEM14A,APOM,RIPOR2,DCUN1D3,RNF40,KIF20B,KIF11,INPP5F,LRRTM3,WAPL,SPTY2D1,MIER1,HGF,PAQR3,ADGRL1,APC,SFRP2,LRRN1,DDR1,CD2AP,VPS4B,CEP76,EPB41L3,TRAF3IP1,SMG1,RABGEF1,SFPQ,IKBKB,MCU,PPFIA1,SVIP,FNBP1L,BRAF,RAB21,BBS10,SYT1,S…
GO:BP	regulation of biological quality	GO:0065008	3.02886e-16	15.5187	2543	4434	921	15439	KITLG,RIDA,CXCL10,OPRK1,CCT8,ATP6V1A,RABL3,CLDN1,ADIPOQ,CLDN18,RAPGEF4,MAIP1,EPHA4,STX12,IQGAP3,NAPEPLD,POT1,ANO6,IGF1,SLC9B2,RAP1GDS1,SULT1B1,SLC4A4,GM2A,GRIA1,GABRA6,ARRDC3,EBF2,IARS1,GJA1,ATG5,SLC22A2,CRHBP,HOMER1,TXNDC16,HACD3,BLOC1S6,SPART,CACNB2,TGM2,TRIM21,ATP1B1,SLC10A7,SLC7A11,PDGFC,ENSCHIG00000021323,RAP1GAP2,CHRNB1,MPP2,CARTPT,PIK3R1,NUP155,SLMAP,PDE12,BMP5,TMEM14A,RRN3,PRKG1,LRRTM3,DD…
GO:BP	response to organic substance	GO:0010033	3.03984e-16	15.5171	1779	4434	676	15439	CXCL10,ADIPOQ,CLDN18,CXCR4,EPHA4,RHBDD1,IQGAP3,ECM1,GDAP2,TUT4,CNOT2,USP15,IGF1,ABCC9,KLRK1,CLEC7A,LEF1,SLC9B2,LAMTOR3,TMEM33,NR3C1,ASPN,BCLAF1,CRHBP,HOMER1,UBR1,FGF7,SOCS5,SPART,NCOA2,TRIM21,SLC1A2,YOD1,TNFSF18,SLC7A11,PDGFC,MYOCD,PIK3R1,ADAMTS12,PDE12,RIPOR2,ONECUT2,LCOR,TRIM25,HGF,CFTR,KLF9,GNRH1,APC,LYPD1,SFRP2,HCN1,PRLR,PTAFR,GLP1R,VPS4B,COLEC12,GAREM1,RABGEF1,ACKR3,RAB11FIP2,CPEB3,CCDC186,I…
GO:BP	negative regulation of nitrogen compound metabolic process	GO:0051172	3.67489e-16	15.4348	1667	4434	639	15439	RIDA,ADIPOQ,EPHA4,KHDRBS1,ECM1,DR1,DHCR24,POT1,PRICKLE1,CNOT2,IGF1,LEF1,KLF3,TNFAIP8,NR3C1,ZBTB5,NCOA7,ATG5,BCLAF1,PAIP2B,SOCS5,ENSCHIG00000018361,EPC1,ITCH,ENSCHIG00000024446,NCOA2,PKIA,HEY1,RRP8,TRIM21,YOD1,ATXN1L,MYOCD,ENC1,GZMA,MITF,RNF40,LCOR,INPP5F,MIER1,HGF,PAQR3,CAMLG,APC,ANGEL2,SFRP2,SMCHD1,RYBP,ATXN1,PPARD,RBM24,FOXF2,TRAF3IP1,RABGEF1,SFPQ,CPEB3,AGO3,IKBKB,DUSP4,SVIP,GLMN,TENT5C,PRKAG2,…
GO:BP	regulation of RNA metabolic process	GO:0051252	4.7589e-16	15.3225	2632	4434	948	15439	RIDA,ADIPOQ,EPC2,IKZF2,KHDRBS1,ECM1,PSRC1,DR1,NFIA,TUT4,MEOX2,HBP1,PRICKLE1,CNOT2,IGF1,BBS7,LEF1,KLF3,NR3C1,ZBTB5,EBF2,NCOA7,TBPL1,BCLAF1,TTC5,ICE2,FGF7,ENSCHIG00000018361,EPC1,ITCH,NCOA2,HEY1,ABRA,ESRP1,RRP8,TRIM21,EHF,AHCTF1,GTF2H3,SBNO1,ZFP1,ATXN1L,ZFP30,ENSCHIG00000017808,MYOCD,MBTD1,PIK3R1,ZNF445,MITF,PDE12,BMP5,SRPK1,ENSCHIG00000008358,ONECUT2,RRN3,ZKSCAN2,RNF40,LCOR,SPTY2D1,TRIM25,MIER1,SL…
GO:BP	intracellular signal transduction	GO:0035556	5.21361e-16	15.2829	1715	4434	654	15439	KITLG,CXCL10,RABL3,ADIPOQ,RAPGEF4,CXCR4,EPHA4,IQGAP3,LURAP1,FIGNL1,USP15,IGF1,NDNF,TBCK,LAMTOR3,MAPK10,ARRDC3,BCLAF1,HACD3,UBR1,SOCS5,RXFP2,ITCH,ABRA,RRP8,CDC42BPA,ATP1B1,GARRE1,RAP1GAP2,CARTPT,PIK3R1,SRPK1,RIPOR2,RRN3,PRKG1,INPP5F,GPR137B,DDIAS,TSPYL5,TRIM25,HGF,PAQR3,ADRA2B,TEAD1,SFRP2,PTAFR,CD2AP,PPARD,GLP1R,GAREM1,RNF152,SEH1L,RNF125,RABGEF1,ACKR3,CHP2,SFPQ,AGO3,IKBKB,DUSP4,POLB,MCU,ITSN1,DOC…
GO:BP	regulation of nucleobase-containing compound metabolic process	GO:0019219	9.52943e-16	15.0209	2803	4434	1000	15439	RIDA,CCT8,ADIPOQ,EPC2,IKZF2,KHDRBS1,ECM1,PSRC1,DR1,NFIA,TUT4,FIGNL1,MEOX2,HBP1,POT1,PRICKLE1,CNOT2,IGF1,BBS7,LEF1,KLF3,SLC4A4,NR3C1,ZBTB5,EBF2,NCOA7,TBPL1,BCLAF1,TTC5,ICE2,FGF7,ENSCHIG00000018361,EPC1,ITCH,NCOA2,HEY1,ABRA,ESRP1,RRP8,TRIM21,EHF,AHCTF1,GTF2H3,SBNO1,RFC5,ZFP1,ATXN1L,ZFP30,ENSCHIG00000017808,MYOCD,MBTD1,PIK3R1,GZMA,ZNF445,MITF,PDE12,BMP5,SRPK1,ENSCHIG00000008358,ONECUT2,RRN3,ZKSCAN2,…
GO:BP	organelle organization	GO:0006996	9.67769e-16	15.0142	2574	4434	928	15439	CCT8,ARL13B,MAIP1,ABI2,STX12,MREG,ANP32E,PSRC1,ELAPOR1,DR1,FIGNL1,POT1,LRRC4,CEP41,CNOT2,USP15,GAS2L3,IGF1,BBS7,LEF1,TBCK,NCAPG,TMEM33,SLAIN2,NR3C1,G3BP1,STX17,CLVS2,GJA1,AFG1L,ATG5,TBPL1,FGF7,DAAM1,GCC2,CEP68,ENSCHIG00000027081,SPART,PIP4K2A,EPC1,TMEM41B,RRP8,CDC42BPA,AHCTF1,DENR,RFC5,ENSCHIG00000021323,CHD9,CLIP3,MYOCD,MBTD1,RETREG3,MPP2,PIK3R1,NUP155,GOLGA5,TMEM14A,VAPA,ONECUT2,UBN1,RRN3,RNF40…
GO:BP	regulation of cellular macromolecule biosynthetic process	GO:2000112	2.21364e-15	14.6549	2714	4434	970	15439	RIDA,CCT8,RABL3,ADIPOQ,EPC2,IKZF2,KHDRBS1,ECM1,PSRC1,DR1,NFIA,TUT4,MEOX2,HBP1,POT1,PRICKLE1,CNOT2,IGF1,BBS7,LEF1,KLF3,NR3C1,ZBTB5,EBF2,NCOA7,TBPL1,BCLAF1,TTC5,ICE2,FGF7,PAIP2B,ENSCHIG00000018361,EPC1,ITCH,NCOA2,HEY1,ABRA,RRP8,TRIM21,EHF,AHCTF1,GTF2H3,SBNO1,RFC5,ZFP1,ATXN1L,ZFP30,ENSCHIG00000017808,MYOCD,MBTD1,ENC1,PIK3R1,ZNF445,MITF,BMP5,ENSCHIG00000008358,ONECUT2,RRN3,ZKSCAN2,LCOR,WAPL,SPTY2D1,T…
GO:BP	regulation of cellular biosynthetic process	GO:0031326	2.27631e-15	14.6428	2890	4434	1025	15439	RIDA,CCT8,RABL3,ADIPOQ,EPC2,IKZF2,KHDRBS1,ECM1,PSRC1,DR1,NFIA,TUT4,MEOX2,HBP1,POT1,PRICKLE1,CNOT2,IGF1,KLRK1,CLEC7A,BBS7,LEF1,KLF3,NR3C1,ZBTB5,EBF2,NCOA7,TBPL1,BCLAF1,TTC5,ICE2,FGF7,PAIP2B,ENSCHIG00000018361,EPC1,ITCH,NCOA2,HEY1,ABRA,RRP8,TRIM21,EHF,AHCTF1,SLC7A11,GTF2H3,SBNO1,RFC5,ZFP1,ATXN1L,ZFP30,ENSCHIG00000017808,MYOCD,MBTD1,ENC1,PIK3R1,ZNF445,MITF,BMP5,ENSCHIG00000008358,ONECUT2,RRN3,ZKSCAN…
GO:BP	macromolecule metabolic process	GO:0043170	2.77232e-15	14.5572	7663	4434	2446	15439	KITLG,RIDA,CCT8,RABL3,XXYLT1,MASP1,ADIPOQ,DCUN1D1,NCEH1,TTC3,PPIG,EPC2,ORC4,DPP10,ORC2,IKZF2,EPHA4,RHBDD1,KHDRBS1,DHDDS,IQGAP3,SYT11,PGLYRP3,ECM1,PSRC1,DR1,ENSCHIG00000013246,NFIA,DHCR24,TUT4,LURAP1,FIGNL1,MEOX2,TWISTNB,HBP1,FKBP14,YAE1,POT1,PRICKLE1,CNOT2,USP15,IGF1,NUAK1,YARS2,KLRK1,CLEC7A,BBS7,NDNF,LEF1,TBCK,LAMTOR3,TRMT10A,PPM1K,KLF3,THAP9,MAPK10,TNFAIP8,NR3C1,G3BP1,GRIA1,SLU7,ARRDC3,GALNTL6,…
GO:BP	regulation of biosynthetic process	GO:0009889	4.04072e-15	14.3935	2930	4434	1036	15439	RIDA,CCT8,RABL3,ADIPOQ,EPC2,IKZF2,KHDRBS1,ECM1,PSRC1,DR1,NFIA,TUT4,MEOX2,HBP1,POT1,PRICKLE1,CNOT2,IGF1,KLRK1,CLEC7A,BBS7,LEF1,KLF3,NR3C1,ZBTB5,EBF2,NCOA7,TBPL1,BCLAF1,TTC5,ICE2,FGF7,PAIP2B,ENSCHIG00000018361,EPC1,ITCH,NCOA2,HEY1,ABRA,RRP8,TRIM21,EHF,AHCTF1,SLC7A11,GTF2H3,SBNO1,RFC5,ZFP1,ATXN1L,ZFP30,ENSCHIG00000017808,MYOCD,MBTD1,ENC1,PIK3R1,ZNF445,MITF,BMP5,ENSCHIG00000008358,ONECUT2,RRN3,ZKSCAN…
GO:BP	regulation of signal transduction	GO:0009966	4.29399e-15	14.3671	1957	4434	728	15439	KITLG,RABL3,ADIPOQ,CXCR4,EPHA4,IQGAP3,ECM1,TUT4,LURAP1,FIGNL1,PRICKLE1,CNOT2,USP15,IGF1,LEF1,TBCK,LAMTOR3,TMEM33,G3BP1,ARRDC3,ASPN,BCLAF1,CRHBP,HOMER1,UBR1,SOCS5,SPART,ITCH,HEY1,ABRA,TNFSF18,RAP1GAP2,MYOCD,CARTPT,PIK3R1,ADAMTS12,BMP5,TMEM14A,RIPOR2,ELP2,ONECUT2,RRN3,INPP5F,GPR137B,DDIAS,TSPYL5,TRIM25,HGF,PAQR3,APC,ADRA2B,TMEM64,LYPD1,SFRP2,PRLR,CD2AP,PPARD,GAREM1,RNF152,SEH1L,RNF125,TRAF3IP1,RABG…
GO:BP	negative regulation of gene expression	GO:0010629	4.67055e-15	14.3306	1349	4434	529	15439	RIDA,ADIPOQ,KHDRBS1,IQGAP3,SYT11,PGLYRP3,DR1,TUT4,PRICKLE1,CNOT2,IGF1,LEF1,KLF3,NR3C1,ZBTB5,BCLAF1,PAIP2B,SOCS5,ENSCHIG00000018361,EPC1,NCOA2,HEY1,RRP8,ATXN1L,MYOCD,ENC1,MITF,PDE12,RNF40,LCOR,MIER1,HGF,ANGEL2,SFRP2,SMCHD1,RYBP,ATXN1,ILRUN,CD2AP,PPARD,RBM24,FOXF2,RNF125,TRAF3IP1,SMG1,RABGEF1,SFPQ,CPEB3,AGO3,TENT5C,MDFIC,ENSCHIG00000008899,CBX6,ATF4,RBPJ,LARP1,PURA,ETF1,PTBP1,GATAD2A,PCBP3,PHF2,PTB…
GO:BP	regulation of macromolecule biosynthetic process	GO:0010556	8.16478e-15	14.0881	2798	4434	993	15439	RIDA,CCT8,RABL3,ADIPOQ,EPC2,IKZF2,KHDRBS1,ECM1,PSRC1,DR1,NFIA,TUT4,MEOX2,HBP1,POT1,PRICKLE1,CNOT2,IGF1,CLEC7A,BBS7,LEF1,KLF3,NR3C1,ZBTB5,EBF2,NCOA7,TBPL1,BCLAF1,TTC5,ICE2,FGF7,PAIP2B,ENSCHIG00000018361,EPC1,ITCH,NCOA2,HEY1,ABRA,RRP8,TRIM21,EHF,AHCTF1,GTF2H3,SBNO1,RFC5,ZFP1,ATXN1L,ZFP30,ENSCHIG00000017808,MYOCD,MBTD1,ENC1,PIK3R1,ZNF445,MITF,BMP5,ENSCHIG00000008358,ONECUT2,RRN3,ZKSCAN2,LCOR,WAPL,SP…
GO:BP	generation of neurons	GO:0048699	9.79417e-15	14.009	965	4434	398	15439	EPHA4,NDNF,LEF1,BLOC1S6,SPART,RAP1GAP2,RETREG3,BMP5,RIPOR2,VAPA,ONECUT2,PRKG1,KIF20B,INPP5F,PAQR3,GNRH1,ADRA2B,SFRP2,ATP2B2,DDR1,ZNF521,EPB41L3,HOOK3,ANK3,DOCK7,HIPK1,LHX8,BRAF,RAB21,SYT1,SCYL2,RBPJ,APBB2,GABRB2,CYFIP2,JADE2,C9ORF72,PLAA,VLDLR,FYN,ARID1B,HIF1A,NIN,PAX7,ABI1,YTHDF1,MATN2,LRP12,VXN,LYN,RIMS1,WEE1,DDX6,YAP1,MARK1,PTPN11,ARHGAP35,BAIAP2,MMD,CRK,PAFAH1B1,ERCC3,DAG1,FN1,UHMK1,AMIGO1,PL…
GO:BP	cellular response to endogenous stimulus	GO:0071495	9.82154e-15	14.0078	812	4434	345	15439	ADIPOQ,EPHA4,CNOT2,USP15,IGF1,LEF1,LAMTOR3,NR3C1,ASPN,CRHBP,UBR1,FGF7,SPART,PDGFC,MYOCD,PIK3R1,ADAMTS12,ONECUT2,CFTR,KLF9,APC,SFRP2,HCN1,PRLR,GLP1R,GAREM1,CPEB3,CACNA2D1,ENSCHIG00000008899,C2CD5,LMO3,CASP6,RBPJ,RGMB,LARP1,RAB14,CTSB,CD109,PHIP,FYN,KAT2B,IGFBP5,THBS1,RHOQ,TBC1D4,UBR5,CYP7B1,YAP1,PRDM16,SSH1,PTPN11,GLG1,ENSCHIG00000010440,CREBRF,UBE3A,TGFBR2,RAP1B,GHRHR,CHST11,SOX5,PKD2,RNF111,DNMT…
GO:BP	negative regulation of cellular metabolic process	GO:0031324	1.34423e-14	13.8715	1813	4434	679	15439	RIDA,ADIPOQ,EPHA4,KHDRBS1,ECM1,DR1,DHCR24,POT1,PRICKLE1,CNOT2,IGF1,LEF1,KLF3,TNFAIP8,NR3C1,ZBTB5,NCOA7,ATG5,BCLAF1,PAIP2B,SOCS5,ENSCHIG00000018361,EPC1,ITCH,ENSCHIG00000024446,NCOA2,PKIA,HEY1,RRP8,TRIM21,YOD1,GPATCH2,CNST,ATXN1L,MYOCD,ENC1,GZMA,MITF,PDE12,BMP5,RNF40,LCOR,INPP5F,WAPL,MIER1,HGF,PAQR3,CAMLG,APC,ANGEL2,SFRP2,SMCHD1,RYBP,ATXN1,PPARD,RBM24,FOXF2,TRAF3IP1,RABGEF1,MARF1,SFPQ,CPEB3,AGO3,I…
GO:BP	response to endogenous stimulus	GO:0009719	1.81135e-14	13.742	878	4434	367	15439	ADIPOQ,EPHA4,CNOT2,USP15,IGF1,LEF1,LAMTOR3,NR3C1,ASPN,CRHBP,UBR1,FGF7,SOCS5,SPART,NCOA2,PDGFC,MYOCD,PIK3R1,ADAMTS12,ONECUT2,TRIM25,CFTR,KLF9,GNRH1,APC,SFRP2,HCN1,PRLR,GLP1R,GAREM1,CPEB3,CACNA2D1,ENSCHIG00000008899,C2CD5,LMO3,CASP6,RBPJ,RGMB,LARP1,RAB14,CTSB,CD109,PHIP,FYN,KAT2B,IGFBP5,THBS1,RHOQ,TBC1D4,UBR5,CYP7B1,LYN,YAP1,PRDM16,SSH1,PTPN11,GLG1,ENSCHIG00000010440,CREBRF,UBE3A,TGFBR2,RAP1B,GHRHR…
GO:BP	cellular metabolic process	GO:0044237	1.87585e-14	13.7268	8449	4434	2664	15439	KITLG,RIDA,CCT8,ATP6V1A,RABL3,XXYLT1,ADIPOQ,DCUN1D1,NCEH1,TTC3,PPIG,EPC2,ORC4,ENSCHIG00000020570,ORC2,ENSCHIG00000017628,IKZF2,EPHA4,RHBDD1,KHDRBS1,STX12,DHDDS,IQGAP3,SYT11,ECM1,HAO2,PSRC1,ELAPOR1,DR1,ENSCHIG00000013246,NFIA,DHCR24,TUT4,FIGNL1,MEOX2,TWISTNB,NAPEPLD,HBP1,FKBP14,POT1,PRICKLE1,CNOT2,USP15,IGF1,NUAK1,YARS2,KLRK1,GABARAPL1,CLEC7A,BBS7,NDNF,LEF1,TBCK,LAMTOR3,TRMT10A,PPM1K,KLF3,SULT1B1,…
GO:BP	establishment of localization in cell	GO:0051649	3.84166e-14	13.4155	1253	4434	493	15439	CXCL10,ADIPOQ,RAPGEF4,MAIP1,RHBDD1,KHDRBS1,STX12,MREG,SYT11,PSRC1,PRICKLE1,SLC9B2,SLU7,STX17,XPO7,GJA1,ATG5,SLC22A2,TMEM87A,BLOC1S6,GCC2,CACNB2,ABRA,YOD1,ENSCHIG00000023339,PIK3R1,NUP155,VAPA,KIF20B,VTI1A,INPP5F,SEC23IP,CFTR,APPBP2,SNX18,NUP153,ATXN1,VPS4B,SEH1L,RABGEF1,CHP2,LZTS2,RAB11FIP2,CCDC186,HOOK3,VPS37A,TOMM20,SVIP,ITSN1,RAB3B,SCP2,HOOK1,FNBP1L,BRAF,MDFIC,STARD3NL,CACNA2D1,RAB21,SYT1,PPP1…
GO:BP	protein phosphorylation	GO:0006468	8.05682e-14	13.0938	1402	4434	541	15439	KITLG,ADIPOQ,EPHA4,IQGAP3,PSRC1,USP15,IGF1,NUAK1,TBCK,LAMTOR3,MAPK10,CDK19,HACD3,FGF7,SOCS5,ITCH,PKIA,CDC42BPA,TNFSF18,PDGFC,GTF2H3,CLIP3,MYOCD,CARTPT,PIK3R1,BMP5,SRPK1,PRKG1,INPP5F,HGF,PAQR3,APC,ADRA2B,SFRP2,LCP2,PRLR,CACUL1,DDR1,GAREM1,TRAF3IP1,SMG1,EEF2K,RABGEF1,ACKR3,IKBKB,DUSP4,DOCK7,HIPK1,PRKAG2,BRAF,MDFIC,DUSP6,SCYL2,STK38L,LMO3,BMP2K,PJA2,C9ORF72,VLDLR,DYRK1A,CD109,FYN,KAT2B,GRM1,STYX,TYR…
GO:BP	animal organ development	GO:0048513	8.46156e-14	13.0725	2251	4434	815	15439	KITLG,ARL13B,RABL3,CLDN1,ADIPOQ,CLDN18,EPHA4,IQGAP3,PGLYRP3,ECM1,NFIA,DHCR24,MEOX2,ANO6,PRICKLE1,IGF1,LEF1,SLC9B2,ARRDC3,EBF2,ASPN,GJA1,ATG5,HOMER1,FGF7,SOCS5,SPART,RXFP2,PIP4K2A,TGM2,SLC1A2,SLC10A7,SLC7A11,PDGFC,ATXN1L,MYOCD,PIK3R1,ADAMTS12,SSUH2,MITF,BMP5,RIPOR2,ONECUT2,PRKG1,PDLIM3,HGF,GNRH1,TMEM64,SFRP2,SMCHD1,MRTFB,DDR1,PPARD,RBM24,FOXF2,DSG2,GREB1L,TRAF3IP1,SBDS,LZTS2,HOOK3,POLB,ETS1,GAS2,H…
GO:BP	cell morphogenesis	GO:0000902	8.87123e-14	13.052	654	4434	286	15439	ARL13B,EPHA4,LEF1,SPART,TBCC,RIPOR2,KIF20B,HGF,DDR1,MYL12B,EPB41L3,ANK3,DOCK7,BRAF,RAB21,SYT1,EPS8,ATF4,APBB2,CYFIP2,JADE2,C9ORF72,PLAA,VLDLR,PHIP,FYN,CERT1,NIN,TYRO3,MERTK,RHOQ,CLIC4,ABI1,YTHDF1,MATN2,RIMS1,WEE1,YAP1,SSH1,PTPN11,ARHGAP35,FMNL2,BAIAP2,CRK,PAFAH1B1,DAG1,DLG1,FN1,CDC42SE1,PLPPR4,MET,RHOJ,BDNF,AXL,FOXP1,VSIG1,BMPR1B,NEDD9,NEDD4L,SMAD4,LIPA,PICALM,CABP4,SLITRK2,NRCAM,CRPPA,AP1AR,WDR1…
GO:BP	cell population proliferation	GO:0008283	1.09648e-13	12.96	1253	4434	491	15439	KITLG,CXCL10,CLDN1,ADIPOQ,IQGAP3,ECM1,FIGNL1,IGF1,CLEC7A,LEF1,TBCK,GJA1,FGF7,ITCH,EHF,TNFSF18,SLC7A11,PDGFC,ATXN1L,MYOCD,MITF,BMP5,RRN3,PRKG1,ENSCHIG00000006638,KIF20B,WAPL,TSPYL5,HGF,KLF9,APC,SFRP2,CACUL1,DDR1,PPARD,GAREM1,SBDS,CHP2,LZTS2,AGO3,HOOK3,DOCK7,GLMN,F3,HIPK1,BRAF,SP1,TIAM1,RBPJ,LARP1,PURA,NR4A3,CD109,FYN,ENSCHIG00000018293,SATB1,KAT2B,HIF1A,CERT1,IGFBP5,THBS1,MEIS2,PAX7,BIRC6,CYP1B1,N…
GO:BP	negative regulation of RNA metabolic process	GO:0051253	1.6992e-13	12.7698	944	4434	386	15439	ADIPOQ,KHDRBS1,DR1,PRICKLE1,CNOT2,LEF1,KLF3,NR3C1,ZBTB5,BCLAF1,ENSCHIG00000018361,EPC1,NCOA2,HEY1,RRP8,ATXN1L,MYOCD,MITF,RNF40,LCOR,MIER1,ANGEL2,SFRP2,SMCHD1,RYBP,ATXN1,PPARD,RBM24,FOXF2,SFPQ,CPEB3,TENT5C,MDFIC,ENSCHIG00000008899,CBX6,ATF4,RBPJ,LARP1,PURA,PTBP1,GATAD2A,PCBP3,PHF2,PTBP3,DYRK1A,ENSCHIG00000018293,SYNCRIP,SATB1,KAT2B,BCL11A,NACC2,DACH1,SAP18,TAF3,MTDH,KLF10,NPAT,YAP1,PRDM16,KDM5B,SA…
GO:BP	negative regulation of macromolecule biosynthetic process	GO:0010558	1.89035e-13	12.7235	1015	4434	410	15439	RIDA,ADIPOQ,KHDRBS1,DR1,POT1,PRICKLE1,CNOT2,LEF1,KLF3,NR3C1,ZBTB5,BCLAF1,PAIP2B,ENSCHIG00000018361,EPC1,NCOA2,HEY1,RRP8,ATXN1L,MYOCD,ENC1,MITF,LCOR,WAPL,MIER1,SFRP2,SMCHD1,RYBP,ATXN1,PPARD,RBM24,FOXF2,SFPQ,CPEB3,AGO3,MDFIC,ENSCHIG00000008899,CBX6,ATF4,RBPJ,PDS5A,LARP1,PURA,GATAD2A,PCBP3,PHF2,ENSCHIG00000018293,SYNCRIP,SATB1,IGFBP5,BCL11A,NACC2,DACH1,TAF3,MTDH,KLF10,AGO2,NPAT,YAP1,PRDM16,RC3H1,KDM…
GO:BP	enzyme linked receptor protein signaling pathway	GO:0007167	2.41254e-13	12.6175	644	4434	281	15439	ADIPOQ,NCEH1,EPHA4,USP15,IGF1,LEF1,ASPN,FGF7,SOCS5,SPART,PDGFC,MYOCD,PIK3R1,ADAMTS12,BMP5,ONECUT2,HGF,APC,SFRP2,PRLR,DDR1,GAREM1,RABGEF1,F3,ENSCHIG00000008899,C2CD5,RBPJ,RGMB,CYFIP2,JADE2,RAB14,NR4A3,CD109,PHIP,HIF1A,IGFBP5,THBS1,RHOQ,LYN,CBL,PRDM16,PTPN11,GLG1,CRK,EPN2,LIFR,TGFBR2,MET,GHRHR,CHST11,RNF111,SMAD9,HHIP,AXL,CSF1,CAV2,BMPR1B,PTPRJ,TRIM72,SMAD4,TWSG1,TGFB1I1,PDGFA,MAPK3,PLEKHA1,SNX25,M…
GO:BP	regulation of protein modification process	GO:0031399	2.55593e-13	12.5925	1282	4434	499	15439	KITLG,RABL3,ADIPOQ,DCUN1D1,EPHA4,IQGAP3,PSRC1,PRICKLE1,IGF1,NUAK1,LAMTOR3,ARRDC3,NCOA7,ATG5,FGF7,PPP2R5E,SOCS5,ITCH,PKIA,TRIM21,TNFSF18,PDGFC,CLIP3,MYOCD,CARTPT,BMP5,RNF40,INPP5F,TSPYL5,HGF,PAQR3,CAMLG,APC,ADRA2B,SFRP2,LCP2,PRLR,CACUL1,FOXF2,GAREM1,TRAF3IP1,EEF2K,RABGEF1,ACKR3,IKBKB,DUSP4,SVIP,DOCK7,GLMN,ARNT,ENSCHIG00000023800,PRKAG2,BRAF,MDFIC,PPP1R12A,DUSP6,LMO3,PJA2,PTBP1,KDM4B,C9ORF72,PLAA,V…
GO:BP	regulation of transcription, DNA-templated	GO:0006355	2.68279e-13	12.5714	2412	4434	863	15439	ADIPOQ,EPC2,IKZF2,KHDRBS1,ECM1,PSRC1,DR1,NFIA,TUT4,MEOX2,HBP1,PRICKLE1,CNOT2,IGF1,BBS7,LEF1,KLF3,NR3C1,ZBTB5,EBF2,NCOA7,TBPL1,BCLAF1,TTC5,ICE2,FGF7,ENSCHIG00000018361,EPC1,ITCH,NCOA2,HEY1,ABRA,RRP8,TRIM21,EHF,AHCTF1,GTF2H3,SBNO1,ZFP1,ATXN1L,ZFP30,ENSCHIG00000017808,MYOCD,MBTD1,PIK3R1,ZNF445,MITF,BMP5,ENSCHIG00000008358,ONECUT2,RRN3,ZKSCAN2,LCOR,SPTY2D1,TRIM25,MIER1,SLC30A9,TEAD1,SFRP2,SMCHD1,MRTF…
GO:BP	nitrogen compound transport	GO:0071705	2.91902e-13	12.5348	1319	4434	511	15439	SLC35A5,ADIPOQ,RAPGEF4,MAIP1,RHBDD1,KHDRBS1,STX12,SYT11,VPS45,PRICKLE1,IGF1,BBS7,SLC9B2,SLU7,STX17,XPO7,ATG5,ENSCHIG00000022022,SLC22A2,CRHBP,SLC7A7,BLOC1S6,GCC2,ABRA,TIMM8B,SLC1A2,YOD1,CNST,SLC10A7,SLC7A11,SNX20,CLIP3,ENSCHIG00000023339,CARTPT,PIK3R1,NUP155,KIF20B,VTI1A,CFTR,APPBP2,LCP2,SNX18,NUP153,EXOC2,CD2AP,SEH1L,RABGEF1,CHP2,RAB11FIP2,CCDC186,VPS37A,ANK3,MCU,TOMM20,SVIP,RAB3B,GLMN,SLC25A24,…
GO:BP	regulation of cell differentiation	GO:0045595	3.69371e-13	12.4325	1197	4434	470	15439	KITLG,CXCL10,ADIPOQ,CLDN18,EPHA4,PGLYRP3,CD53,NAPEPLD,PRICKLE1,IGF1,CLEC7A,NDNF,LEF1,SLC9B2,GJA1,SOCS5,SPART,RAP1GAP2,MYOCD,RETREG3,PIK3R1,ADAMTS12,ZNF445,MITF,BMP5,RIPOR2,KIF20B,INPP5F,PAQR3,GNRH1,ADRA2B,TMEM64,SFRP2,PPARD,RBM24,HOOK3,IKBKB,ETS1,BRAF,RAB21,SYT1,TIAM1,LMO3,WNT5B,ATF4,RBPJ,CDS1,JADE2,PTBP1,PLAA,VLDLR,RECK,PTBP3,CD109,FYN,HIF1A,IGFBP5,NIN,MEIS2,PAX7,YTHDF1,KLF10,LYN,RIMS1,DDX6,YAP1…
GO:BP	regulation of protein metabolic process	GO:0051246	5.52812e-13	12.2574	1923	4434	706	15439	KITLG,RIDA,RABL3,ADIPOQ,DCUN1D1,EPHA4,RHBDD1,KHDRBS1,IQGAP3,ECM1,PSRC1,DHCR24,PRICKLE1,IGF1,NUAK1,CLEC7A,BBS7,LEF1,LAMTOR3,TNFAIP8,ARRDC3,NCOA7,ATG5,FGF7,PPP2R5E,PAIP2B,SOCS5,ITCH,ENSCHIG00000024446,PKIA,TRIM21,YOD1,TNFSF18,PDGFC,CLIP3,MYOCD,ENC1,CARTPT,BMP5,RNF40,INPP5F,LRRTM3,TSPYL5,HGF,PAQR3,CAMLG,APC,ADRA2B,SFRP2,LCP2,PRLR,CACUL1,RYBP,RBM24,FOXF2,GAREM1,TRAF3IP1,EEF2K,RABGEF1,ACKR3,CPEB3,AGO3…
GO:BP	organic substance transport	GO:0071702	6.66528e-13	12.1762	1608	4434	604	15439	SLC35A5,ADIPOQ,RAPGEF4,MAIP1,RHBDD1,KHDRBS1,STX12,SYT11,VPS45,ANO6,PRICKLE1,IGF1,BBS7,SLC9B2,SLC4A4,SLC10A6,SLU7,STX17,XPO7,ATG5,ENSCHIG00000022022,SLC22A2,CRHBP,SLC7A7,BLOC1S6,GCC2,ABRA,TIMM8B,SLC1A2,YOD1,CNST,SLC10A7,SLC7A11,SNX20,CLIP3,ENSCHIG00000023339,CARTPT,PIK3R1,NUP155,APOM,KIF20B,VTI1A,ENSCHIG00000016601,CFTR,ENSCHIG00000025589,APPBP2,LCP2,SNX18,NUP153,EXOC2,CD2AP,PPARD,VPS4B,SEH1L,RABG…
GO:BP	movement of cell or subcellular component	GO:0006928	1.16379e-12	11.9341	1376	4434	527	15439	KITLG,CXCL10,ARL13B,CLDN1,ADIPOQ,EPHA4,MREG,ECM1,MEOX2,ANO6,IGF1,KLRK1,CLEC7A,NDNF,LEF1,SLC9B2,GJA1,FGF7,BLOC1S6,CACNB2,CDC42BPA,TNFSF18,CCL17,MYOCD,PIK3R1,NUP155,ADAMTS12,MITF,RIPOR2,ONECUT2,PRKG1,KIF20B,KIF11,INPP5F,HGF,GNRH1,APC,SFRP2,TTLL6,DDR1,PPARD,DNAH8,DSG2,RABGEF1,SBDS,ANK3,MCU,ETS1,DOCK7,FNBP1L,BRAF,CACNA2D1,SP1,TIAM1,EPS8,WNT5B,CACNA1C,APBB2,ATP8A1,PURA,PLAA,GCNT1,VPS13A,RECK,NR4A3,FYN…
GO:BP	regulation of cellular protein metabolic process	GO:0032268	1.30158e-12	11.8855	1817	4434	670	15439	KITLG,RIDA,RABL3,ADIPOQ,DCUN1D1,EPHA4,RHBDD1,KHDRBS1,IQGAP3,ECM1,PSRC1,DHCR24,PRICKLE1,IGF1,NUAK1,CLEC7A,BBS7,LEF1,LAMTOR3,TNFAIP8,ARRDC3,NCOA7,ATG5,FGF7,PPP2R5E,PAIP2B,SOCS5,ITCH,ENSCHIG00000024446,PKIA,TRIM21,YOD1,TNFSF18,PDGFC,CLIP3,MYOCD,ENC1,CARTPT,BMP5,RNF40,INPP5F,TSPYL5,HGF,PAQR3,CAMLG,APC,ADRA2B,SFRP2,LCP2,PRLR,CACUL1,RYBP,RBM24,FOXF2,GAREM1,TRAF3IP1,EEF2K,RABGEF1,ACKR3,CPEB3,AGO3,IKBKB,…
GO:BP	negative regulation of nucleobase-containing compound metabolic process	GO:0045934	1.47221e-12	11.832	1017	4434	407	15439	ADIPOQ,KHDRBS1,DR1,POT1,PRICKLE1,CNOT2,LEF1,KLF3,NR3C1,ZBTB5,BCLAF1,ENSCHIG00000018361,EPC1,NCOA2,HEY1,RRP8,ATXN1L,MYOCD,GZMA,MITF,RNF40,LCOR,MIER1,ANGEL2,SFRP2,SMCHD1,RYBP,ATXN1,PPARD,RBM24,FOXF2,SFPQ,CPEB3,TENT5C,MDFIC,ENSCHIG00000008899,CBX6,ATF4,RBPJ,LARP1,PURA,PTBP1,GATAD2A,PCBP3,PHF2,PTBP3,DYRK1A,ENSCHIG00000018293,SYNCRIP,SATB1,KAT2B,BCL11A,NACC2,DACH1,SAP18,TAF3,MTDH,UBR5,KLF10,NPAT,YAP1,…
GO:BP	neuron differentiation	GO:0030182	1.6412e-12	11.7848	856	4434	352	15439	EPHA4,NDNF,BLOC1S6,SPART,RAP1GAP2,RETREG3,BMP5,RIPOR2,VAPA,ONECUT2,PRKG1,KIF20B,INPP5F,PAQR3,ADRA2B,SFRP2,ATP2B2,DDR1,ZNF521,EPB41L3,ANK3,DOCK7,HIPK1,LHX8,BRAF,RAB21,SYT1,SCYL2,RBPJ,APBB2,GABRB2,CYFIP2,JADE2,C9ORF72,PLAA,VLDLR,FYN,ARID1B,HIF1A,NIN,PAX7,ABI1,YTHDF1,MATN2,LRP12,VXN,LYN,RIMS1,WEE1,DDX6,MARK1,PTPN11,ARHGAP35,BAIAP2,MMD,CRK,PAFAH1B1,ERCC3,DAG1,FN1,UHMK1,AMIGO1,PLPPR4,UBA6,MEIS1,SNAP25…
GO:BP	regulation of RNA biosynthetic process	GO:2001141	1.83065e-12	11.7374	2466	4434	875	15439	ADIPOQ,EPC2,IKZF2,KHDRBS1,ECM1,PSRC1,DR1,NFIA,TUT4,MEOX2,HBP1,PRICKLE1,CNOT2,IGF1,BBS7,LEF1,KLF3,NR3C1,ZBTB5,EBF2,NCOA7,TBPL1,BCLAF1,TTC5,ICE2,FGF7,ENSCHIG00000018361,EPC1,ITCH,NCOA2,HEY1,ABRA,RRP8,TRIM21,EHF,AHCTF1,GTF2H3,SBNO1,ZFP1,ATXN1L,ZFP30,ENSCHIG00000017808,MYOCD,MBTD1,PIK3R1,ZNF445,MITF,BMP5,ENSCHIG00000008358,ONECUT2,RRN3,ZKSCAN2,LCOR,SPTY2D1,TRIM25,MIER1,SLC30A9,TEAD1,SFRP2,SMCHD1,MRTF…
GO:BP	regulation of nucleic acid-templated transcription	GO:1903506	2.10872e-12	11.676	2464	4434	874	15439	ADIPOQ,EPC2,IKZF2,KHDRBS1,ECM1,PSRC1,DR1,NFIA,TUT4,MEOX2,HBP1,PRICKLE1,CNOT2,IGF1,BBS7,LEF1,KLF3,NR3C1,ZBTB5,EBF2,NCOA7,TBPL1,BCLAF1,TTC5,ICE2,FGF7,ENSCHIG00000018361,EPC1,ITCH,NCOA2,HEY1,ABRA,RRP8,TRIM21,EHF,AHCTF1,GTF2H3,SBNO1,ZFP1,ATXN1L,ZFP30,ENSCHIG00000017808,MYOCD,MBTD1,PIK3R1,ZNF445,MITF,BMP5,ENSCHIG00000008358,ONECUT2,RRN3,ZKSCAN2,LCOR,SPTY2D1,TRIM25,MIER1,SLC30A9,TEAD1,SFRP2,SMCHD1,MRTF…
GO:BP	cellular macromolecule localization	GO:0070727	2.45877e-12	11.6093	1136	4434	446	15439	CCT8,ADIPOQ,CLDN18,DPP10,MAIP1,RHBDD1,STX12,SYT11,POT1,LRRC4,PRICKLE1,LAMTOR3,SLU7,STX17,XPO7,GJA1,FGF7,GCC2,CEP68,ARL5B,GPR158,ABRA,YOD1,CNST,ATP1B1,SLC7A11,CLIP3,PIGW,ENSCHIG00000023339,PIK3R1,NUP155,SLMAP,RIPOR2,VAPA,KIF20B,VTI1A,GPR137B,WAPL,PAQR3,APC,LYPD1,APPBP2,TMEM107,ILRUN,CD2AP,EPB41L3,SEH1L,RABGEF1,CHP2,LZTS2,HOOK3,IKBKB,ANK3,TOMM20,PPFIA1,SVIP,ITSN1,MDFIC,C2CD5,TMEM129,PURA,SEC24A,XPA…
GO:BP	cellular protein localization	GO:0034613	2.91942e-12	11.5347	1131	4434	444	15439	CCT8,ADIPOQ,CLDN18,DPP10,MAIP1,RHBDD1,STX12,SYT11,POT1,LRRC4,PRICKLE1,LAMTOR3,SLU7,STX17,XPO7,GJA1,FGF7,GCC2,CEP68,ARL5B,GPR158,ABRA,YOD1,CNST,ATP1B1,SLC7A11,CLIP3,PIGW,ENSCHIG00000023339,PIK3R1,NUP155,SLMAP,RIPOR2,VAPA,KIF20B,VTI1A,GPR137B,WAPL,PAQR3,APC,LYPD1,APPBP2,TMEM107,ILRUN,CD2AP,EPB41L3,SEH1L,RABGEF1,CHP2,LZTS2,HOOK3,IKBKB,ANK3,TOMM20,PPFIA1,SVIP,ITSN1,MDFIC,C2CD5,TMEM129,PURA,SEC24A,XPA…
GO:BP	positive regulation of RNA metabolic process	GO:0051254	3.88252e-12	11.4109	1244	4434	481	15439	RIDA,IKZF2,PSRC1,NFIA,MEOX2,IGF1,LEF1,NR3C1,EBF2,NCOA7,TBPL1,BCLAF1,TTC5,ICE2,FGF7,EPC1,NCOA2,ABRA,EHF,MYOCD,PIK3R1,MITF,BMP5,ENSCHIG00000008358,ONECUT2,RRN3,SLC30A9,SFRP2,MRTFB,RYBP,PPARD,RBM24,FOXF2,CHP2,SFPQ,CPEB3,IKBKB,ETS1,ARNT,NHLH2,MDFIC,NAMPT,SP1,PPP1R12A,SLC38A2,NFYB,ATF4,RBPJ,XPA,NR4A3,PHF2,DYRK1A,PHIP,ENSCHIG00000018293,KAT2B,HIF1A,JMY,MEIS2,PAX7,RHOQ,ENSCHIG00000023777,WAC,MTDH,KLF10,…
GO:BP	negative regulation of cellular macromolecule biosynthetic process	GO:2000113	4.04028e-12	11.3936	981	4434	393	15439	RIDA,ADIPOQ,KHDRBS1,DR1,POT1,PRICKLE1,CNOT2,LEF1,KLF3,NR3C1,ZBTB5,BCLAF1,PAIP2B,ENSCHIG00000018361,EPC1,NCOA2,HEY1,RRP8,ATXN1L,MYOCD,ENC1,MITF,LCOR,WAPL,MIER1,SFRP2,SMCHD1,RYBP,ATXN1,PPARD,RBM24,FOXF2,SFPQ,CPEB3,AGO3,MDFIC,ENSCHIG00000008899,CBX6,ATF4,RBPJ,PDS5A,LARP1,PURA,GATAD2A,PCBP3,PHF2,ENSCHIG00000018293,SYNCRIP,SATB1,IGFBP5,BCL11A,NACC2,DACH1,TAF3,MTDH,KLF10,AGO2,PRDM16,RC3H1,KDM5B,SALL1,N…
GO:BP	transcription, DNA-templated	GO:0006351	4.12791e-12	11.3843	2540	4434	896	15439	ADIPOQ,EPC2,IKZF2,KHDRBS1,ECM1,PSRC1,DR1,NFIA,TUT4,MEOX2,TWISTNB,HBP1,PRICKLE1,CNOT2,IGF1,BBS7,LEF1,KLF3,NR3C1,ZBTB5,EBF2,NCOA7,TBPL1,BCLAF1,TTC5,ICE2,FGF7,ENSCHIG00000018361,ENSCHIG00000027081,EPC1,ITCH,NCOA2,HEY1,ABRA,RRP8,TRIM21,EHF,AHCTF1,GTF2H3,SBNO1,ZFP1,ATXN1L,ZFP30,ENSCHIG00000017808,MYOCD,MBTD1,PIK3R1,ZNF445,MITF,BMP5,ENSCHIG00000008358,ONECUT2,RRN3,ZKSCAN2,LCOR,SPTY2D1,TRIM25,MIER1,SLC3…
GO:BP	negative regulation of cellular biosynthetic process	GO:0031327	5.55165e-12	11.2556	1054	4434	417	15439	RIDA,ADIPOQ,KHDRBS1,DR1,POT1,PRICKLE1,CNOT2,LEF1,KLF3,NR3C1,ZBTB5,BCLAF1,PAIP2B,ENSCHIG00000018361,EPC1,NCOA2,HEY1,RRP8,ATXN1L,MYOCD,ENC1,MITF,BMP5,LCOR,WAPL,MIER1,SFRP2,SMCHD1,RYBP,ATXN1,PPARD,RBM24,FOXF2,SFPQ,CPEB3,AGO3,MDFIC,ENSCHIG00000008899,CBX6,ATF4,RBPJ,PDS5A,LARP1,PURA,GATAD2A,PCBP3,PHF2,ENSCHIG00000018293,SYNCRIP,SATB1,IGFBP5,BCL11A,NACC2,DACH1,TAF3,MTDH,KLF10,AGO2,NPAT,YAP1,PRDM16,RC3H…
GO:BP	organic substance metabolic process	GO:0071704	6.32764e-12	11.1988	8921	4434	2778	15439	KITLG,RIDA,CCT8,ATP6V1A,RABL3,XXYLT1,MASP1,ADIPOQ,DCUN1D1,NCEH1,TTC3,PPIG,EPC2,ORC4,DPP10,ORC2,ENSCHIG00000017628,IKZF2,EPHA4,RHBDD1,KHDRBS1,DHDDS,IQGAP3,SYT11,PGLYRP3,ECM1,HAO2,PSRC1,DR1,ENSCHIG00000013246,NFIA,DHCR24,TUT4,LURAP1,FIGNL1,MEOX2,TWISTNB,NAPEPLD,HBP1,FKBP14,YAE1,POT1,PRICKLE1,CNOT2,USP15,IGF1,NUAK1,YARS2,KLRK1,CLEC7A,BBS7,NDNF,LEF1,TBCK,LAMTOR3,TRMT10A,PPM1K,KLF3,SULT1B1,SLC4A4,THAP…
GO:BP	plasma membrane bounded cell projection organization	GO:0120036	7.51148e-12	11.1243	940	4434	378	15439	ARL13B,EPHA4,CEP41,ANO6,BBS7,NDNF,ATG5,BLOC1S6,SPART,RAP1GAP2,RETREG3,BMP5,RIPOR2,VAPA,ONECUT2,PRKG1,KIF20B,INPP5F,PAQR3,APC,SFRP2,TMEM107,DDR1,EPB41L3,TRAF3IP1,ANK3,DOCK7,FNBP1L,BRAF,RAB21,BBS10,SYT1,TTLL8,APBB2,CEP70,CYFIP2,TXNDC15,JADE2,C9ORF72,PLAA,VLDLR,FYN,ARID1B,NIN,RHOQ,ABI1,YTHDF1,MATN2,LRP12,LYN,RIMS1,WEE1,MARK1,PTPN11,ARHGAP35,BAIAP2,CRK,PAFAH1B1,NCKAP1,DAG1,FN1,UHMK1,AMIGO1,PLPPR4,PKD…
GO:BP	cell-cell signaling	GO:0007267	7.51148e-12	11.1243	940	4434	378	15439	ADIPOQ,RAPGEF4,EPHA4,SYT11,LRRC4,PRICKLE1,LEF1,SLC9B2,GABRG1,G3BP1,GRIA1,GJA1,CRHBP,HOMER1,FGF7,CACNB2,SLC7A11,CHRNB1,MPP2,CARTPT,NUP155,MITF,HGF,CFTR,APC,TMEM64,LYPD1,SFRP2,LCP2,LZTS2,RAB11FIP2,CCDC186,MCU,SHANK2,RIN1,RAB3B,GLMN,BRAF,MDFIC,CACNA2D1,SYT1,WNT5B,CACNA1C,ATF4,RBPJ,RECK,FYN,ENSCHIG00000018293,SNX3,ARID1B,HIF1A,GJD2,USP34,NAPB,YTHDF1,UBR5,LYN,LIN7C,YAP1,PLEKHG5,KDM5B,PTPN11,GLRB,TMEM1…
GO:BP	negative regulation of biosynthetic process	GO:0009890	8.00589e-12	11.0966	1068	4434	421	15439	RIDA,ADIPOQ,KHDRBS1,DR1,POT1,PRICKLE1,CNOT2,LEF1,KLF3,NR3C1,ZBTB5,BCLAF1,PAIP2B,ENSCHIG00000018361,EPC1,NCOA2,HEY1,RRP8,ATXN1L,MYOCD,ENC1,MITF,BMP5,LCOR,WAPL,MIER1,SFRP2,SMCHD1,RYBP,ATXN1,PPARD,RBM24,FOXF2,SFPQ,CPEB3,AGO3,MDFIC,ENSCHIG00000008899,CBX6,ATF4,RBPJ,PDS5A,LARP1,PURA,GATAD2A,PCBP3,PHF2,ENSCHIG00000018293,SYNCRIP,SATB1,IGFBP5,BCL11A,NACC2,DACH1,TAF3,MTDH,KLF10,AGO2,NPAT,YAP1,PRDM16,RC3H…
GO:BP	positive regulation of nucleobase-containing compound metabolic process	GO:0045935	8.1714e-12	11.0877	1361	4434	518	15439	RIDA,CCT8,IKZF2,PSRC1,NFIA,MEOX2,POT1,IGF1,LEF1,SLC4A4,NR3C1,EBF2,NCOA7,TBPL1,BCLAF1,TTC5,ICE2,FGF7,EPC1,NCOA2,ABRA,EHF,RFC5,MYOCD,PIK3R1,MITF,BMP5,ENSCHIG00000008358,ONECUT2,RRN3,HGF,SLC30A9,SFRP2,SMCHD1,MRTFB,RYBP,PPARD,RBM24,FOXF2,CHP2,SFPQ,CPEB3,IKBKB,ETS1,KMT5B,ARNT,NHLH2,MDFIC,NAMPT,SP1,PPP1R12A,SLC38A2,NFYB,ATF4,RBPJ,XPA,NR4A3,PHF2,DYRK1A,PHIP,ENSCHIG00000018293,KAT2B,HIF1A,JMY,MEIS2,PAX7,…
GO:BP	positive regulation of gene expression	GO:0010628	1.38076e-11	10.8599	1629	4434	604	15439	ADIPOQ,IKZF2,RHBDD1,KHDRBS1,IQGAP3,PSRC1,NFIA,TUT4,LURAP1,MEOX2,USP15,IGF1,KLRK1,CLEC7A,LEF1,NR3C1,EBF2,NCOA7,GJA1,TBPL1,BCLAF1,TTC5,ICE2,FGF7,EPC1,NCOA2,ABRA,EHF,MYOCD,PIK3R1,MITF,BMP5,ENSCHIG00000008358,ONECUT2,RRN3,HGF,SLC30A9,ANGEL2,SFRP2,MRTFB,RYBP,PPARD,RBM24,FOXF2,RNF125,CHP2,SFPQ,AGO3,IKBKB,ETS1,RBM4B,GLMN,F3,TENT5C,ARNT,NHLH2,BRAF,MDFIC,NAMPT,SP1,PPP1R12A,SLC38A2,NFYB,ATF4,RBPJ,LARP1,XPA…
GO:BP	neuron development	GO:0048666	1.49892e-11	10.8242	693	4434	292	15439	EPHA4,NDNF,BLOC1S6,SPART,RAP1GAP2,RETREG3,BMP5,RIPOR2,VAPA,ONECUT2,PRKG1,KIF20B,INPP5F,PAQR3,SFRP2,DDR1,EPB41L3,ANK3,DOCK7,LHX8,BRAF,RAB21,SYT1,SCYL2,APBB2,GABRB2,CYFIP2,JADE2,C9ORF72,PLAA,VLDLR,FYN,ARID1B,NIN,ABI1,YTHDF1,MATN2,LRP12,LYN,RIMS1,WEE1,MARK1,PTPN11,ARHGAP35,BAIAP2,CRK,PAFAH1B1,DAG1,FN1,UHMK1,AMIGO1,PLPPR4,UBA6,SNAP25,STMN2,BDNF,TRIP11,FOXP1,THRB,BMPR1B,MYLIP,NEDD4L,SMAD4,ERCC6,PICALM…
GO:BP	phosphorus metabolic process	GO:0006793	1.52924e-11	10.8155	2449	4434	864	15439	KITLG,ATP6V1A,ADIPOQ,NCEH1,ENSCHIG00000017628,EPHA4,DHDDS,IQGAP3,PSRC1,NAPEPLD,USP15,IGF1,NUAK1,TBCK,LAMTOR3,PPM1K,SULT1B1,SLC4A4,MAPK10,PPIP5K2,CDC14C,CDK19,AFG1L,TBPL1,NT5E,HACD3,FGF7,PPP2R5E,SOCS5,PIP4K2A,ITCH,PKIA,GPATCH2,CDC42BPA,CNST,TNFSF18,PDGFC,GTF2H3,CLIP3,PIGW,MYOCD,CARTPT,PIK3R1,PDE12,BMP5,SRPK1,PRKG1,ENSCHIG00000006638,INPP5F,HGF,PAQR3,RFK,APC,ADRA2B,SFRP2,PIPOX,LCP2,PRLR,PPCDC,PTAFR…
GO:BP	nucleic acid-templated transcription	GO:0097659	1.54226e-11	10.8118	2590	4434	908	15439	ADIPOQ,EPC2,IKZF2,KHDRBS1,ECM1,PSRC1,DR1,NFIA,TUT4,MEOX2,TWISTNB,HBP1,PRICKLE1,CNOT2,IGF1,BBS7,LEF1,KLF3,NR3C1,ZBTB5,EBF2,NCOA7,TBPL1,BCLAF1,TTC5,ICE2,FGF7,ENSCHIG00000018361,ENSCHIG00000027081,EPC1,ITCH,NCOA2,HEY1,ABRA,RRP8,TRIM21,EHF,AHCTF1,GTF2H3,SBNO1,ZFP1,ATXN1L,ZFP30,ENSCHIG00000017808,MYOCD,MBTD1,PIK3R1,ZNF445,MITF,BMP5,ENSCHIG00000008358,ONECUT2,RRN3,ZKSCAN2,LCOR,SPTY2D1,TRIM25,MIER1,SLC3…
GO:BP	phosphate-containing compound metabolic process	GO:0006796	1.751e-11	10.7567	2431	4434	858	15439	KITLG,ATP6V1A,ADIPOQ,NCEH1,ENSCHIG00000017628,EPHA4,DHDDS,IQGAP3,PSRC1,NAPEPLD,USP15,IGF1,NUAK1,TBCK,LAMTOR3,PPM1K,SULT1B1,SLC4A4,MAPK10,PPIP5K2,CDC14C,CDK19,AFG1L,TBPL1,NT5E,HACD3,FGF7,PPP2R5E,SOCS5,PIP4K2A,ITCH,PKIA,GPATCH2,CDC42BPA,CNST,TNFSF18,PDGFC,GTF2H3,CLIP3,PIGW,MYOCD,CARTPT,PIK3R1,PDE12,BMP5,SRPK1,PRKG1,ENSCHIG00000006638,INPP5F,HGF,PAQR3,RFK,APC,ADRA2B,SFRP2,PIPOX,LCP2,PRLR,PPCDC,PTAFR…
GO:BP	tube development	GO:0035295	1.77778e-11	10.7501	763	4434	316	15439	CXCL10,ARL13B,CLDN18,EPHA4,ECM1,NFIA,MEOX2,PRICKLE1,NDNF,LEF1,FGF7,TGM2,HEY1,SLC7A11,PDGFC,ATXN1L,MYOCD,ADAMTS12,KIF20B,SFRP2,TMEM107,DDR1,FOXF2,GREB1L,TRAF3IP1,ACKR3,LZTS2,ETS1,GLMN,F3,SP1,RBPJ,RECK,QKI,HIF1A,IGFBP5,THBS1,PAX7,CYP1B1,CLIC4,MTDH,AGO2,YAP1,KDM5B,SALL1,ARHGAP35,ACTG1,VEZF1,EPN2,DAG1,TGFBR2,DLG1,ATF2,MET,PKD2,PCSK5,RSPO3,RHOJ,MEIS1,BDNF,HHIP,MINAR1,WDR48,FOXP1,EMX2,RARB,THRB,CSF1,RA…
GO:BP	cellular component assembly	GO:0022607	2.03122e-11	10.6922	1828	4434	667	15439	CCT8,ARL13B,CLDN1,STX12,PSRC1,ELAPOR1,POT1,LRRC4,CEP41,ANO6,CNOT2,CLEC7A,BBS7,GABRA2,SLAIN2,G3BP1,SLU7,STX17,ATG5,TBPL1,PIP4K2A,TMEM41B,RRP8,SLC1A2,AHCTF1,PDGFC,DENR,CLIP3,ANKRA2,PIK3R1,MITF,HLA-DRA,APOM,RIPOR2,ONECUT2,UBN1,RRN3,KIF11,LRRTM3,SPTY2D1,TSPYL5,ADGRL1,APC,TMEM107,HCN1,PRLR,H1-6,SMCHD1,UBAP2L,LRRN1,H1-3,NUP153,VPS4B,CEP76,EPB41L3,TRAF3IP1,SBDS,TMEM159,LZTS2,EIF3A,AGO3,IKBKB,ANK3,MCU,SH…
GO:BP	RNA biosynthetic process	GO:0032774	2.05896e-11	10.6864	2599	4434	910	15439	ADIPOQ,EPC2,IKZF2,KHDRBS1,ECM1,PSRC1,DR1,NFIA,TUT4,MEOX2,TWISTNB,HBP1,PRICKLE1,CNOT2,IGF1,BBS7,LEF1,KLF3,NR3C1,ZBTB5,EBF2,NCOA7,TBPL1,BCLAF1,TTC5,ICE2,FGF7,ENSCHIG00000018361,ENSCHIG00000027081,EPC1,ITCH,NCOA2,HEY1,ABRA,RRP8,TRIM21,EHF,AHCTF1,GTF2H3,SBNO1,ZFP1,ATXN1L,ZFP30,ENSCHIG00000017808,MYOCD,MBTD1,PIK3R1,ZNF445,MITF,BMP5,ENSCHIG00000008358,ONECUT2,RRN3,ZKSCAN2,LCOR,SPTY2D1,TRIM25,MIER1,SLC3…
GO:BP	cell projection organization	GO:0030030	2.40453e-11	10.619	967	4434	385	15439	ARL13B,EPHA4,CEP41,ANO6,BBS7,NDNF,ATG5,BLOC1S6,SPART,RAP1GAP2,RETREG3,BMP5,RIPOR2,VAPA,ONECUT2,PRKG1,KIF20B,INPP5F,PAQR3,APC,SFRP2,TMEM107,DDR1,EPB41L3,TRAF3IP1,ANK3,DOCK7,FNBP1L,BRAF,RAB21,BBS10,SYT1,TTLL8,APBB2,CEP70,CYFIP2,TXNDC15,JADE2,C9ORF72,PLAA,VLDLR,FYN,ARID1B,NIN,RHOQ,ABI1,YTHDF1,MATN2,LRP12,LYN,RIMS1,WEE1,MARK1,PTPN11,ARHGAP35,BAIAP2,CRK,PAFAH1B1,NCKAP1,DAG1,FN1,UHMK1,AMIGO1,PLPPR4,PKD…
GO:BP	cell surface receptor signaling pathway	GO:0007166	2.97334e-11	10.5268	1809	4434	660	15439	CD36,KITLG,CXCL10,ARL13B,ADIPOQ,NCEH1,CLDN18,CXCR4,EPHA4,KHDRBS1,ECM1,TUT4,ANO6,PRICKLE1,USP15,IGF1,KLRK1,LEF1,G3BP1,GRIA1,ASPN,CRHBP,FGF7,SOCS5,SPART,HEY1,TNFSF18,PDGFC,CHRNB1,MYOCD,MPP2,PIK3R1,ADAMTS12,MITF,BMP5,ELP2,ONECUT2,INPP5F,HGF,ENSCHIG00000020632,ADGRL1,APC,TMEM64,SFRP2,GRIA2,LCP2,PRLR,PTAFR,CD247,DDR1,GLP1R,GAREM1,TRAF3IP1,RABGEF1,ACKR3,LZTS2,IKBKB,GAS2,GLMN,F3,HIPK1,IFNAR1,BRAF,MDFIC,…
GO:BP	amide transport	GO:0042886	3.1998e-11	10.4949	1100	4434	429	15439	ADIPOQ,RAPGEF4,MAIP1,RHBDD1,STX12,SYT11,VPS45,PRICKLE1,IGF1,BBS7,SLC9B2,SLU7,STX17,XPO7,ENSCHIG00000022022,CRHBP,BLOC1S6,GCC2,ABRA,TIMM8B,YOD1,CNST,SLC10A7,SLC7A11,SNX20,CLIP3,ENSCHIG00000023339,PIK3R1,NUP155,KIF20B,VTI1A,CFTR,APPBP2,LCP2,SNX18,EXOC2,CD2AP,SEH1L,RABGEF1,CHP2,RAB11FIP2,CCDC186,VPS37A,ANK3,MCU,TOMM20,SVIP,GLMN,MDFIC,RAB21,C2CD5,NUP50,TMEM129,PURA,SEC24A,VLDLR,FYN,SNX3,UBE2J1,HIF1A,…
GO:BP	regulation of phosphate metabolic process	GO:0019220	4.87307e-11	10.3122	1190	4434	458	15439	KITLG,ADIPOQ,EPHA4,IQGAP3,PSRC1,IGF1,NUAK1,LAMTOR3,SLC4A4,FGF7,PPP2R5E,SOCS5,ITCH,PKIA,GPATCH2,CNST,TNFSF18,PDGFC,CLIP3,MYOCD,CARTPT,PDE12,BMP5,INPP5F,HGF,PAQR3,APC,ADRA2B,SFRP2,LCP2,PRLR,CACUL1,GAREM1,TRAF3IP1,EEF2K,RABGEF1,MARF1,ACKR3,CHP2,IKBKB,DUSP4,ITSN1,DOCK7,GLMN,ENSCHIG00000023800,PRKAG2,BRAF,MDFIC,PPP1R12A,DUSP6,LMO3,PJA2,PTBP1,C9ORF72,VLDLR,CD109,FYN,KAT2B,ARFGEF3,GRM1,HIF1A,STYX,THBS1,…
GO:BP	regulation of phosphorus metabolic process	GO:0051174	4.87307e-11	10.3122	1190	4434	458	15439	KITLG,ADIPOQ,EPHA4,IQGAP3,PSRC1,IGF1,NUAK1,LAMTOR3,SLC4A4,FGF7,PPP2R5E,SOCS5,ITCH,PKIA,GPATCH2,CNST,TNFSF18,PDGFC,CLIP3,MYOCD,CARTPT,PDE12,BMP5,INPP5F,HGF,PAQR3,APC,ADRA2B,SFRP2,LCP2,PRLR,CACUL1,GAREM1,TRAF3IP1,EEF2K,RABGEF1,MARF1,ACKR3,CHP2,IKBKB,DUSP4,ITSN1,DOCK7,GLMN,ENSCHIG00000023800,PRKAG2,BRAF,MDFIC,PPP1R12A,DUSP6,LMO3,PJA2,PTBP1,C9ORF72,VLDLR,CD109,FYN,KAT2B,ARFGEF3,GRM1,HIF1A,STYX,THBS1,…
GO:BP	neuron projection development	GO:0031175	5.19432e-11	10.2845	593	4434	255	15439	EPHA4,NDNF,BLOC1S6,SPART,RAP1GAP2,RETREG3,BMP5,RIPOR2,VAPA,PRKG1,KIF20B,INPP5F,PAQR3,SFRP2,DDR1,EPB41L3,ANK3,DOCK7,BRAF,RAB21,SYT1,APBB2,CYFIP2,JADE2,C9ORF72,PLAA,VLDLR,FYN,ARID1B,NIN,ABI1,YTHDF1,MATN2,LRP12,LYN,RIMS1,WEE1,MARK1,PTPN11,ARHGAP35,BAIAP2,CRK,PAFAH1B1,DAG1,FN1,UHMK1,AMIGO1,PLPPR4,UBA6,SNAP25,STMN2,BDNF,TRIP11,FOXP1,BMPR1B,MYLIP,NEDD4L,SMAD4,ERCC6,PICALM,SLITRK2,NRCAM,CRPPA,PTPRS,PALL…
GO:BP	establishment of localization	GO:0051234	6.75186e-11	10.1706	3468	4434	1174	15439	CXCL10,OPRK1,CCT8,SLC35A5,ATP6V1A,ADIPOQ,ENSCHIG00000020065,RAPGEF4,MAIP1,RHBDD1,KHDRBS1,STX12,MREG,SYT11,VPS45,PSRC1,POT1,ANO6,PRICKLE1,IGF1,ABCC9,CLEC7A,BBS7,SLC9B2,GABRG1,GABRA2,SLC4A4,SLC10A6,GRIA1,SLU7,GABRA6,MFSD14B,STX17,XPO7,GJA1,ATG5,ENSCHIG00000022022,SLC22A2,CRHBP,HOMER1,SLC7A7,TMEM87A,FGF7,BLOC1S6,GCC2,CACNB2,TGM2,ABRA,TIMM8B,SLC1A2,YOD1,CNST,ATP1B1,SLC10A7,SLC7A11,SNX20,CLIP3,ENSCHIG…
GO:BP	phosphorylation	GO:0016310	7.11512e-11	10.1478	1725	4434	631	15439	KITLG,ADIPOQ,EPHA4,IQGAP3,PSRC1,USP15,IGF1,NUAK1,TBCK,LAMTOR3,SLC4A4,MAPK10,PPIP5K2,CDK19,AFG1L,HACD3,FGF7,SOCS5,PIP4K2A,ITCH,PKIA,CDC42BPA,TNFSF18,PDGFC,GTF2H3,CLIP3,MYOCD,CARTPT,PIK3R1,PDE12,BMP5,SRPK1,PRKG1,INPP5F,HGF,PAQR3,RFK,APC,ADRA2B,SFRP2,LCP2,PRLR,CACUL1,DDR1,GAREM1,TRAF3IP1,SMG1,EEF2K,RABGEF1,ACKR3,IKBKB,DUSP4,ITSN1,DOCK7,GLMN,HIPK1,PRKAG2,BRAF,MDFIC,DUSP6,SCYL2,STK38L,LMO3,BMP2K,PJA2,…
GO:BP	regulation of transcription by RNA polymerase II	GO:0006357	7.17421e-11	10.1442	1446	4434	541	15439	EPC2,IKZF2,KHDRBS1,ECM1,DR1,NFIA,MEOX2,CNOT2,IGF1,BBS7,LEF1,KLF3,NR3C1,ZBTB5,EBF2,NCOA7,TBPL1,TTC5,EPC1,NCOA2,HEY1,ABRA,EHF,ATXN1L,MYOCD,PIK3R1,MITF,BMP5,ENSCHIG00000008358,ONECUT2,LCOR,SLC30A9,SFRP2,MRTFB,RYBP,PPARD,FOXF2,CHP2,SFPQ,CPEB3,IKBKB,ETS1,ARNT,PBX1,LHX8,NHLH2,NAMPT,SP1,PPP1R12A,ENSCHIG00000008899,NFYB,CBX6,ATF4,RBPJ,GATAD2A,XPA,NR4A3,PCBP3,ZNF367,PHIP,ENSCHIG00000018293,SATB1,KAT2B,HIF…
GO:BP	nitrogen compound metabolic process	GO:0006807	9.16972e-11	10.0376	7962	4434	2496	15439	KITLG,RIDA,CCT8,ATP6V1A,RABL3,XXYLT1,MASP1,ADIPOQ,DCUN1D1,NCEH1,TTC3,PPIG,EPC2,ORC4,DPP10,IKZF2,EPHA4,RHBDD1,KHDRBS1,DHDDS,IQGAP3,PGLYRP3,ECM1,PSRC1,DR1,ENSCHIG00000013246,NFIA,DHCR24,TUT4,FIGNL1,MEOX2,TWISTNB,NAPEPLD,HBP1,FKBP14,YAE1,POT1,PRICKLE1,CNOT2,USP15,IGF1,NUAK1,YARS2,KLRK1,CLEC7A,BBS7,NDNF,LEF1,TBCK,LAMTOR3,TRMT10A,PPM1K,KLF3,SULT1B1,SLC4A4,THAP9,MAPK10,TNFAIP8,NR3C1,GM2A,SLU7,ARRDC3,GA…
GO:BP	peptide transport	GO:0015833	1.04632e-10	9.98033	1074	4434	418	15439	ADIPOQ,RAPGEF4,MAIP1,RHBDD1,STX12,SYT11,VPS45,PRICKLE1,IGF1,BBS7,SLC9B2,SLU7,STX17,XPO7,ENSCHIG00000022022,CRHBP,BLOC1S6,GCC2,ABRA,TIMM8B,YOD1,CNST,SLC10A7,SLC7A11,SNX20,CLIP3,ENSCHIG00000023339,PIK3R1,NUP155,KIF20B,VTI1A,CFTR,APPBP2,LCP2,SNX18,EXOC2,CD2AP,SEH1L,RABGEF1,CHP2,RAB11FIP2,CCDC186,VPS37A,ANK3,MCU,TOMM20,SVIP,GLMN,MDFIC,RAB21,C2CD5,NUP50,TMEM129,PURA,SEC24A,VLDLR,FYN,SNX3,UBE2J1,HIF1A,…
GO:BP	negative regulation of nucleic acid-templated transcription	GO:1903507	1.18352e-10	9.92683	878	4434	352	15439	ADIPOQ,KHDRBS1,DR1,PRICKLE1,CNOT2,LEF1,KLF3,NR3C1,ZBTB5,BCLAF1,ENSCHIG00000018361,EPC1,NCOA2,HEY1,RRP8,ATXN1L,MYOCD,MITF,LCOR,MIER1,SFRP2,SMCHD1,RYBP,ATXN1,PPARD,FOXF2,SFPQ,CPEB3,MDFIC,ENSCHIG00000008899,CBX6,ATF4,RBPJ,PURA,GATAD2A,PCBP3,PHF2,ENSCHIG00000018293,SATB1,BCL11A,NACC2,DACH1,TAF3,MTDH,KLF10,NPAT,YAP1,PRDM16,KDM5B,SALL1,NFATC3,DLX4,PAX9,NR2C2,ZNF148,DLG1,ZBTB38,CBX5,PPHLN1,HMBOX1,RFX3,C…
GO:BP	locomotion	GO:0040011	1.23075e-10	9.90983	1211	4434	463	15439	KITLG,CXCL10,ARL13B,CLDN1,ADIPOQ,CXCR4,EPHA4,ECM1,MEOX2,ANO6,IGF1,KLRK1,CLEC7A,NDNF,LEF1,SLC9B2,ARRDC3,GJA1,FGF7,CDC42BPA,TNFSF18,CCL17,MYOCD,PIK3R1,ADAMTS12,MITF,RIPOR2,ONECUT2,PRKG1,KIF20B,INPP5F,HGF,GNRH1,APC,SFRP2,PTAFR,DDR1,PPARD,RABGEF1,ACKR3,SBDS,ANK3,MCU,ETS1,DOCK7,BRAF,SP1,TIAM1,EPS8,WNT5B,APBB2,ATP8A1,PLAA,GCNT1,VPS13A,RECK,NR4A3,FYN,HIF1A,SEMA6D,IGFBP5,TYRO3,THBS1,CYP1B1,CLIC4,DACH1,YT…
GO:BP	cellular response to stress	GO:0033554	1.34828e-10	9.87022	1242	4434	473	15439	EPHA4,RHBDD1,ELAPOR1,FIGNL1,POT1,NUAK1,NDNF,TMEM33,SLU7,NCOA7,ATG5,BCLAF1,CRHBP,HACD3,SOCS5,ITCH,RRP8,YOD1,EXO1,SLC7A11,GTF2H3,ENDOV,CARTPT,PIK3R1,INPP5F,DDIAS,TRIM25,HGF,CFTR,APC,SFRP2,SMCHD1,ACTR8,PPARD,RBM24,RNF152,SEH1L,SMG1,MARF1,MEIOB,ACKR3,SFPQ,POLB,KMT5B,SVIP,USP1,SLC25A24,HIPK1,ARNT,BRAF,MDFIC,SLC38A2,ATF4,RBPJ,TMEM129,LETM1,PJA2,RASGRF2,XPA,USP25,DYRK1A,ENSCHIG00000018293,UBE2J1,HIF1A,C…
GO:BP	negative regulation of RNA biosynthetic process	GO:1902679	1.42445e-10	9.84635	879	4434	352	15439	ADIPOQ,KHDRBS1,DR1,PRICKLE1,CNOT2,LEF1,KLF3,NR3C1,ZBTB5,BCLAF1,ENSCHIG00000018361,EPC1,NCOA2,HEY1,RRP8,ATXN1L,MYOCD,MITF,LCOR,MIER1,SFRP2,SMCHD1,RYBP,ATXN1,PPARD,FOXF2,SFPQ,CPEB3,MDFIC,ENSCHIG00000008899,CBX6,ATF4,RBPJ,PURA,GATAD2A,PCBP3,PHF2,ENSCHIG00000018293,SATB1,BCL11A,NACC2,DACH1,TAF3,MTDH,KLF10,NPAT,YAP1,PRDM16,KDM5B,SALL1,NFATC3,DLX4,PAX9,NR2C2,ZNF148,DLG1,ZBTB38,CBX5,PPHLN1,HMBOX1,RFX3,C…
GO:BP	regulation of cell development	GO:0060284	1.42601e-10	9.84588	586	4434	251	15439	ADIPOQ,CLDN18,EPHA4,IGF1,CLEC7A,NDNF,SLC9B2,SPART,RAP1GAP2,RETREG3,BMP5,KIF20B,INPP5F,PAQR3,GNRH1,ADRA2B,SFRP2,HOOK3,IKBKB,BRAF,RAB21,SYT1,JADE2,PLAA,VLDLR,RECK,FYN,HIF1A,NIN,YTHDF1,LYN,RIMS1,DDX6,YAP1,MARK1,ARHGAP35,MMD,CRK,PAFAH1B1,FN1,RFX3,MEIS1,SNAP25,STMN2,BDNF,BEND6,THRB,CSF1,NEDD9,MYLIP,NEDD4L,SMAD4,NOTCH2,AP1AR,EIF4E,CTNNA1,PTPRS,LPAR1,ENSCHIG00000015151,UST,CAMK1D,NRP1,SS18L1,TGIF2,PREX1…
GO:BP	protein transport	GO:0015031	1.47265e-10	9.8319	1037	4434	405	15439	ADIPOQ,RAPGEF4,MAIP1,RHBDD1,STX12,SYT11,VPS45,PRICKLE1,IGF1,BBS7,SLC9B2,SLU7,STX17,XPO7,ENSCHIG00000022022,BLOC1S6,GCC2,ABRA,TIMM8B,YOD1,CNST,SLC10A7,SLC7A11,SNX20,CLIP3,ENSCHIG00000023339,PIK3R1,NUP155,KIF20B,VTI1A,CFTR,APPBP2,LCP2,SNX18,EXOC2,CD2AP,SEH1L,RABGEF1,CHP2,RAB11FIP2,CCDC186,VPS37A,ANK3,MCU,TOMM20,SVIP,GLMN,MDFIC,RAB21,C2CD5,NUP50,TMEM129,PURA,SEC24A,VLDLR,FYN,SNX3,UBE2J1,HIF1A,STYX,R…
GO:BP	protein modification by small protein conjugation or removal	GO:0070647	1.81591e-10	9.74091	696	4434	289	15439	DCUN1D1,TTC3,PRICKLE1,USP15,ARRDC3,ATG5,UBR1,SOCS5,ENSCHIG00000012902,OTUD1,ITCH,TRIM21,YOD1,ENC1,RNF40,TSPYL5,TRIM25,CAMLG,UBR3,RYBP,FOXF2,RNF152,RNF125,RABGEF1,RNF216,RNF170,FBXO40,USP1,GLMN,ARNT,ZNRF2,KLHL24,TMEM129,PCGF3,PJA2,JADE2,PLAA,USP25,FYN,UBE2J1,TULP4,BIRC6,USP34,WAC,ASXL1,UBR5,DNAJB2,CBL,RC3H1,ENSCHIG00000011390,RNF10,GAN,UBE3A,ENSCHIG00000016989,ANKIB1,CAND1,JOSD1,UBA6,RNF38,UBQLN1,…
GO:BP	transport	GO:0006810	2.07372e-10	9.68325	3355	4434	1136	15439	CXCL10,OPRK1,CCT8,SLC35A5,ATP6V1A,ADIPOQ,ENSCHIG00000020065,RAPGEF4,MAIP1,RHBDD1,KHDRBS1,STX12,MREG,SYT11,VPS45,ANO6,PRICKLE1,IGF1,ABCC9,CLEC7A,BBS7,SLC9B2,GABRG1,GABRA2,SLC4A4,SLC10A6,GRIA1,SLU7,GABRA6,MFSD14B,STX17,XPO7,GJA1,ATG5,ENSCHIG00000022022,SLC22A2,CRHBP,HOMER1,SLC7A7,TMEM87A,FGF7,BLOC1S6,GCC2,CACNB2,TGM2,ABRA,TIMM8B,SLC1A2,YOD1,CNST,ATP1B1,SLC10A7,SLC7A11,SNX20,CLIP3,ENSCHIG00000023339…
GO:BP	regulation of molecular function	GO:0065009	2.47964e-10	9.60561	1942	4434	697	15439	KITLG,ADIPOQ,EPHA4,IQGAP3,ECM1,ANP32E,PSRC1,DHCR24,TUT4,POT1,IGF1,NUAK1,KLRK1,CLEC7A,LEF1,LAMTOR3,RAP1GDS1,ARAP2,ARHGAP24,TNFAIP8,GM2A,ARRDC3,EBF2,CRHBP,HOMER1,PPP2R5E,SOCS5,ITCH,ENSCHIG00000024446,PKIA,HEY1,ABRA,TRIM21,GPATCH2,CNST,ATP1B1,PDGFC,RFC5,RAP1GAP2,MYOCD,CARTPT,GZMA,MTRR,SLMAP,RIPOR2,PRKG1,GPR137B,WAPL,TRIM25,HGF,CFTR,PAQR3,RFK,APC,ADRA2B,TMEM64,LYPD1,RASAL2,SFRP2,LCP2,SNX18,PRLR,CACUL…
GO:BP	positive regulation of transcription, DNA-templated	GO:0045893	2.69134e-10	9.57003	1125	4434	433	15439	IKZF2,PSRC1,NFIA,MEOX2,IGF1,LEF1,NR3C1,EBF2,NCOA7,TBPL1,BCLAF1,TTC5,ICE2,FGF7,EPC1,NCOA2,ABRA,EHF,MYOCD,PIK3R1,MITF,BMP5,ENSCHIG00000008358,ONECUT2,RRN3,SLC30A9,SFRP2,MRTFB,RYBP,PPARD,FOXF2,CHP2,SFPQ,IKBKB,ETS1,ARNT,NHLH2,MDFIC,NAMPT,SP1,PPP1R12A,NFYB,ATF4,RBPJ,XPA,NR4A3,PHF2,PHIP,ENSCHIG00000018293,KAT2B,HIF1A,MEIS2,PAX7,RHOQ,ENSCHIG00000023777,WAC,KLF10,AGO2,NPAT,YAP1,PRDM16,RNF10,SALL1,NFATC3,…
GO:BP	tissue development	GO:0009888	2.89046e-10	9.53903	1302	4434	491	15439	KITLG,CXCL10,ARL13B,ADIPOQ,EPHA4,IQGAP3,ECM1,COL11A1,DHCR24,MEOX2,ANO6,PRICKLE1,IGF1,LEF1,SULT1B1,ARRDC3,EBF2,ASPN,GJA1,ATG5,HOMER1,FGF7,SPART,TGM2,EHF,MYOCD,ADAMTS12,BMP5,RIPOR2,ONECUT2,KIF20B,HGF,SFRP2,TMEM107,MRTFB,DDR1,PPARD,RBM24,FOXF2,DSG2,GREB1L,TRAF3IP1,SBDS,LZTS2,IKBKB,GLMN,TIAM1,WNT5B,ATF4,CASP6,RBPJ,BMP2K,CTSB,BNC2,GCNT1,CD109,SATB1,HIF1A,IGFBP5,PAX7,BIRC6,CYP1B1,CLIC4,PCDH8,ABI1,KLF10…
GO:BP	cellular response to oxygen-containing compound	GO:1901701	3.01089e-10	9.52131	635	4434	267	15439	CXCL10,ADIPOQ,EPHA4,TUT4,IGF1,KLRK1,SLC9B2,LAMTOR3,NR3C1,CRHBP,UBR1,PDGFC,PIK3R1,LCOR,HGF,CFTR,KLF9,APC,LYPD1,HCN1,PTAFR,GLP1R,RAB11FIP2,CPEB3,CCDC186,CACNA2D1,SLC38A2,C2CD5,LARP1,PLAA,PHIP,FYN,KAT2B,HIF1A,GCH1,IGFBP5,CYP1B1,RHOQ,TBC1D4,MTDH,LYN,YAP1,SSH1,PTPN11,ENSCHIG00000010440,ERN1,NFKBIA,RAP1B,PDE4B,MET,GHRHR,PKD2,DNMT3A,NET1,SNAI2,AXL,IP6K2,DCPS,CAV2,ZFP36L1,CPEB1,TRIM72,UBR2,MAPK3,AQP8,PLE…
GO:BP	transcription by RNA polymerase II	GO:0006366	3.1086e-10	9.50744	1512	4434	559	15439	EPC2,IKZF2,KHDRBS1,ECM1,DR1,NFIA,MEOX2,CNOT2,IGF1,BBS7,LEF1,KLF3,NR3C1,ZBTB5,EBF2,NCOA7,TBPL1,TTC5,ICE2,ENSCHIG00000027081,EPC1,NCOA2,HEY1,ABRA,EHF,GTF2H3,ATXN1L,MYOCD,PIK3R1,MITF,BMP5,ENSCHIG00000008358,ONECUT2,LCOR,SLC30A9,SFRP2,MRTFB,RYBP,PPARD,FOXF2,CHP2,SFPQ,CPEB3,IKBKB,ETS1,ARNT,PBX1,LHX8,NHLH2,NAMPT,SP1,PPP1R12A,ENSCHIG00000008899,NFYB,CBX6,ATF4,RBPJ,ELL2,GATAD2A,XPA,NR4A3,PCBP3,ZNF367,PHI…
GO:BP	establishment of protein localization	GO:0045184	3.73588e-10	9.42761	1121	4434	431	15439	CCT8,ADIPOQ,RAPGEF4,MAIP1,RHBDD1,STX12,SYT11,VPS45,POT1,PRICKLE1,IGF1,BBS7,SLC9B2,SLU7,STX17,XPO7,ENSCHIG00000022022,BLOC1S6,GCC2,ABRA,TIMM8B,YOD1,CNST,SLC10A7,SLC7A11,SNX20,CLIP3,ENSCHIG00000023339,PIK3R1,NUP155,RIPOR2,KIF20B,VTI1A,CFTR,APPBP2,LCP2,SNX18,EXOC2,CD2AP,SEH1L,RABGEF1,CHP2,RAB11FIP2,CCDC186,VPS37A,ANK3,MCU,TOMM20,SVIP,GLMN,MDFIC,RAB21,C2CD5,NUP50,TMEM129,PURA,SEC24A,VLDLR,FYN,SNX3,UB…
GO:BP	cell migration	GO:0016477	4.02203e-10	9.39555	980	4434	384	15439	KITLG,CXCL10,ARL13B,CLDN1,ADIPOQ,ECM1,MEOX2,ANO6,IGF1,KLRK1,CLEC7A,NDNF,LEF1,GJA1,FGF7,CDC42BPA,TNFSF18,CCL17,MYOCD,PIK3R1,ADAMTS12,MITF,RIPOR2,ONECUT2,PRKG1,KIF20B,HGF,GNRH1,APC,SFRP2,DDR1,PPARD,RABGEF1,SBDS,MCU,ETS1,DOCK7,BRAF,SP1,TIAM1,EPS8,WNT5B,APBB2,ATP8A1,PLAA,GCNT1,RECK,NR4A3,FYN,HIF1A,SEMA6D,IGFBP5,TYRO3,THBS1,CYP1B1,CLIC4,DACH1,MATN2,LRP12,CYP7B1,LYN,AGO2,RRAS2,AMOTL1,PLEKHG5,PTPN11,ARH…
GO:BP	protein modification by small protein conjugation	GO:0032446	4.30863e-10	9.36566	588	4434	250	15439	DCUN1D1,TTC3,PRICKLE1,ARRDC3,ATG5,UBR1,SOCS5,ENSCHIG00000012902,ITCH,TRIM21,ENC1,RNF40,TSPYL5,TRIM25,CAMLG,UBR3,RYBP,FOXF2,RNF152,RNF125,RABGEF1,RNF216,RNF170,FBXO40,GLMN,ARNT,ZNRF2,KLHL24,TMEM129,PCGF3,PJA2,JADE2,PLAA,FYN,UBE2J1,TULP4,BIRC6,WAC,UBR5,DNAJB2,CBL,RC3H1,ENSCHIG00000011390,RNF10,GAN,UBE3A,ANKIB1,CAND1,UBA6,RNF38,UBQLN1,TRIM36,RNF111,NDFIP2,UBE4A,DTL,RNF185,MINAR1,G2E3,WDR48,KCTD13,CB…
GO:BP	positive regulation of developmental process	GO:0051094	4.67289e-10	9.33041	948	4434	373	15439	KITLG,ADIPOQ,IQGAP3,ECM1,CD53,NAPEPLD,ANO6,IGF1,CLEC7A,NDNF,LEF1,SLC9B2,GJA1,FGF7,SOCS5,ITCH,ATXN1L,MYOCD,RETREG3,BMP5,RIPOR2,KIF20B,LRRTM3,ADGRL1,ADRA2B,TMEM64,SFRP2,MRTFB,LRRN1,PPARD,RBM24,MCU,ETS1,KMT5B,F3,BRAF,SP1,RAB21,SYT1,LMO3,WNT5B,ATF4,RBPJ,CDS1,JADE2,PLAA,VLDLR,FYN,HIF1A,NIN,THBS1,CYP1B1,MTDH,KLF10,LYN,AGO2,RIMS1,YAP1,PRDM16,KDM5B,ARHGAP35,MMD,VEZF1,CRK,PAFAH1B1,TP53BP1,DAG1,TGFBR2,FN1,…
GO:BP	regulation of cell population proliferation	GO:0042127	4.74059e-10	9.32417	1044	4434	405	15439	KITLG,CXCL10,CLDN1,ADIPOQ,IQGAP3,ECM1,IGF1,CLEC7A,LEF1,GJA1,FGF7,ITCH,SLC7A11,PDGFC,ATXN1L,MYOCD,MITF,BMP5,PRKG1,ENSCHIG00000006638,KIF20B,WAPL,TSPYL5,KLF9,APC,SFRP2,CACUL1,DDR1,PPARD,GAREM1,CHP2,LZTS2,AGO3,GLMN,F3,HIPK1,BRAF,SP1,TIAM1,RBPJ,PURA,NR4A3,CD109,ENSCHIG00000018293,KAT2B,HIF1A,IGFBP5,THBS1,MEIS2,PAX7,BIRC6,CYP1B1,NACC2,ENSCHIG00000023777,DACH1,PDS5B,CYP7B1,LYN,SGPP2,DNAJB2,YAP1,RC3H1,K…
GO:BP	circulatory system development	GO:0072359	5.18192e-10	9.28551	736	4434	301	15439	CXCL10,ARL13B,ECM1,MEOX2,PRICKLE1,IGF1,NDNF,LEF1,GJA1,ATG5,HEY1,MYOCD,PDLIM3,SFRP2,RBM24,DSG2,GREB1L,TRAF3IP1,ACKR3,ETS1,GLMN,F3,SP1,DUSP6,CACNA1C,RBPJ,RECK,QKI,HIF1A,CERT1,THBS1,HSPB7,CYP1B1,CLIC4,MTDH,AGO2,YAP1,PTPN11,SALL1,NFATC3,ACTG1,VEZF1,EPN2,TGFBR2,ATF2,PKD2,PCSK5,RSPO3,ADGRG6,RHOJ,MEIS1,MINAR1,TRIP11,FOXP1,RARB,RASA1,ZFP36L1,C6,SMAD4,MAPK3,TCF7L2,ADAM12,MAPK1,TGFBR3,NOTCH2,HOXA3,ENSCHIG0…
GO:BP	response to oxygen-containing compound	GO:1901700	5.25505e-10	9.27942	827	4434	332	15439	CXCL10,ADIPOQ,EPHA4,GDAP2,TUT4,IGF1,ABCC9,KLRK1,SLC9B2,LAMTOR3,NR3C1,CRHBP,HOMER1,UBR1,NCOA2,SLC1A2,PDGFC,PIK3R1,LCOR,HGF,CFTR,KLF9,GNRH1,APC,LYPD1,HCN1,PTAFR,GLP1R,RAB11FIP2,CPEB3,CCDC186,CACNA2D1,SLC38A2,C2CD5,EPS8,GRIN2B,LARP1,PLAA,PHIP,FYN,ENSCHIG00000018293,KAT2B,HIF1A,GCH1,IGFBP5,THBS1,CYP1B1,RHOQ,TBC1D4,NUDT15,MTDH,LYN,YAP1,EDEM3,SSH1,PTPN11,TRPC3,ENSCHIG00000010440,ERN1,UBE3A,NFKBIA,TGFBR…
GO:BP	primary metabolic process	GO:0044238	9.21333e-10	9.03558	8438	4434	2623	15439	KITLG,RIDA,CCT8,ATP6V1A,RABL3,XXYLT1,MASP1,ADIPOQ,DCUN1D1,NCEH1,TTC3,PPIG,EPC2,ORC4,DPP10,ENSCHIG00000017628,IKZF2,EPHA4,RHBDD1,KHDRBS1,DHDDS,IQGAP3,ECM1,HAO2,PSRC1,DR1,ENSCHIG00000013246,NFIA,DHCR24,TUT4,FIGNL1,MEOX2,TWISTNB,NAPEPLD,HBP1,FKBP14,YAE1,POT1,PRICKLE1,CNOT2,USP15,IGF1,NUAK1,YARS2,CLEC7A,BBS7,NDNF,LEF1,TBCK,LAMTOR3,TRMT10A,PPM1K,KLF3,SULT1B1,SLC4A4,THAP9,MAPK10,TNFAIP8,NR3C1,GM2A,SLU7…
GO:BP	protein ubiquitination	GO:0016567	9.55841e-10	9.01961	546	4434	234	15439	TTC3,PRICKLE1,ARRDC3,ATG5,UBR1,SOCS5,ITCH,TRIM21,ENC1,RNF40,TSPYL5,TRIM25,CAMLG,UBR3,RYBP,FOXF2,RNF152,RNF125,RABGEF1,RNF216,RNF170,FBXO40,GLMN,ZNRF2,KLHL24,TMEM129,PCGF3,PJA2,JADE2,PLAA,FYN,UBE2J1,TULP4,BIRC6,WAC,UBR5,DNAJB2,CBL,RC3H1,ENSCHIG00000011390,RNF10,GAN,UBE3A,ANKIB1,CAND1,UBA6,RNF38,UBQLN1,TRIM36,RNF111,NDFIP2,UBE4A,DTL,RNF185,MINAR1,G2E3,WDR48,KCTD13,CBX8,TRIM72,TNKS2,UBR2,MYLIP,NEDD4…
GO:BP	RNA metabolic process	GO:0016070	1.18153e-09	8.92756	3357	4434	1131	15439	RIDA,ADIPOQ,EPC2,IKZF2,KHDRBS1,ECM1,PSRC1,DR1,NFIA,TUT4,MEOX2,TWISTNB,HBP1,PRICKLE1,CNOT2,IGF1,YARS2,BBS7,LEF1,TRMT10A,KLF3,NR3C1,SLU7,ZBTB5,EBF2,IARS1,NCOA7,ENSCHIG00000017313,TBPL1,BCLAF1,TTC5,ICE2,FGF7,ENSCHIG00000018361,ENSCHIG00000027081,EPC1,ITCH,NCOA2,HEY1,ABRA,ESRP1,RRP8,TRIM21,CSTF3,EHF,AHCTF1,GTF2H3,SBNO1,ZFP1,ATXN1L,ZFP30,ENSCHIG00000017808,INTS2,MYOCD,MBTD1,ENDOV,PIK3R1,CPSF2,ZNF445,M…
GO:BP	regulation of phosphorylation	GO:0042325	1.27433e-09	8.89472	1038	4434	401	15439	KITLG,ADIPOQ,EPHA4,IQGAP3,PSRC1,IGF1,LAMTOR3,SLC4A4,FGF7,SOCS5,ITCH,PKIA,TNFSF18,PDGFC,CLIP3,MYOCD,CARTPT,PDE12,BMP5,INPP5F,HGF,PAQR3,APC,ADRA2B,SFRP2,LCP2,PRLR,CACUL1,GAREM1,TRAF3IP1,EEF2K,RABGEF1,ACKR3,IKBKB,DUSP4,ITSN1,DOCK7,GLMN,PRKAG2,BRAF,MDFIC,DUSP6,LMO3,PJA2,C9ORF72,VLDLR,CD109,FYN,KAT2B,GRM1,HIF1A,STYX,THBS1,ABI1,LYN,PTPN11,RBL2,MMD,PPM1E,PAFAH1B1,ERN1,DAG1,TGFBR2,RAP1B,SAMSN1,DLG1,FN1,I…
GO:BP	positive regulation of nucleic acid-templated transcription	GO:1903508	1.36925e-09	8.86352	1181	4434	448	15439	IKZF2,PSRC1,NFIA,MEOX2,IGF1,LEF1,NR3C1,EBF2,NCOA7,TBPL1,BCLAF1,TTC5,ICE2,FGF7,EPC1,NCOA2,ABRA,EHF,MYOCD,PIK3R1,MITF,BMP5,ENSCHIG00000008358,ONECUT2,RRN3,SLC30A9,SFRP2,MRTFB,RYBP,PPARD,FOXF2,CHP2,SFPQ,IKBKB,ETS1,ARNT,NHLH2,MDFIC,NAMPT,SP1,PPP1R12A,NFYB,ATF4,RBPJ,XPA,NR4A3,PHF2,PHIP,ENSCHIG00000018293,KAT2B,HIF1A,JMY,MEIS2,PAX7,RHOQ,ENSCHIG00000023777,WAC,MTDH,KLF10,AGO2,NPAT,YAP1,PRDM16,RNF10,SALL…
GO:BP	positive regulation of RNA biosynthetic process	GO:1902680	1.36925e-09	8.86352	1181	4434	448	15439	IKZF2,PSRC1,NFIA,MEOX2,IGF1,LEF1,NR3C1,EBF2,NCOA7,TBPL1,BCLAF1,TTC5,ICE2,FGF7,EPC1,NCOA2,ABRA,EHF,MYOCD,PIK3R1,MITF,BMP5,ENSCHIG00000008358,ONECUT2,RRN3,SLC30A9,SFRP2,MRTFB,RYBP,PPARD,FOXF2,CHP2,SFPQ,IKBKB,ETS1,ARNT,NHLH2,MDFIC,NAMPT,SP1,PPP1R12A,NFYB,ATF4,RBPJ,XPA,NR4A3,PHF2,PHIP,ENSCHIG00000018293,KAT2B,HIF1A,JMY,MEIS2,PAX7,RHOQ,ENSCHIG00000023777,WAC,MTDH,KLF10,AGO2,NPAT,YAP1,PRDM16,RNF10,SALL…
GO:BP	cellular component morphogenesis	GO:0032989	1.56519e-09	8.80543	472	4434	207	15439	EPHA4,TBPL1,SPART,KIF20B,DDR1,EPB41L3,ANK3,DOCK7,BRAF,RAB21,SYT1,APBB2,CYFIP2,JADE2,C9ORF72,PLAA,VLDLR,FYN,CERT1,NIN,ABI1,YTHDF1,MATN2,RIMS1,WEE1,PTPN11,ARHGAP35,ACTG1,PAFAH1B1,DAG1,FN1,PLPPR4,BDNF,FOXP1,BMPR1B,PIKFYVE,NEDD4L,SMAD4,PICALM,SLITRK2,MFSD14A,NRCAM,CRPPA,WDR1,SNX2,PTPRS,PALLD,UST,OTX2,NRP1,SS18L1,PREX2,CAPRIN1,IHH,CORO1C,TCTN1,ALCAM,ZEB2,VASP,NR4A2,AKAP13,PID1,MAP3K13,KLF7,CREB1,MAP2,…
GO:BP	negative regulation of transcription, DNA-templated	GO:0045892	1.65576e-09	8.781	854	4434	339	15439	ADIPOQ,KHDRBS1,DR1,PRICKLE1,CNOT2,LEF1,KLF3,NR3C1,ZBTB5,BCLAF1,ENSCHIG00000018361,EPC1,NCOA2,HEY1,RRP8,ATXN1L,MYOCD,MITF,LCOR,MIER1,SFRP2,SMCHD1,RYBP,ATXN1,PPARD,FOXF2,SFPQ,CPEB3,MDFIC,ENSCHIG00000008899,CBX6,ATF4,RBPJ,PURA,GATAD2A,PCBP3,PHF2,ENSCHIG00000018293,SATB1,BCL11A,NACC2,DACH1,TAF3,MTDH,KLF10,PRDM16,KDM5B,SALL1,NFATC3,DLX4,PAX9,NR2C2,ZNF148,DLG1,ZBTB38,CBX5,PPHLN1,HMBOX1,RFX3,C1D,TCF23,D…
GO:BP	negative regulation of signaling	GO:0023057	1.79581e-09	8.74574	914	4434	359	15439	ADIPOQ,SYT11,ECM1,FIGNL1,PRICKLE1,CNOT2,IGF1,G3BP1,GRIA1,ARRDC3,ASPN,GJA1,CRHBP,UBR1,SOCS5,SPART,ITCH,HEY1,MYOCD,ADAMTS12,BMP5,TMEM14A,RIPOR2,ONECUT2,RRN3,INPP5F,DDIAS,HGF,PAQR3,APC,TMEM64,SFRP2,CD2AP,RNF152,RNF125,TRAF3IP1,RABGEF1,ACKR3,LZTS2,DUSP4,SHANK2,BRAF,DUSP6,ENSCHIG00000008899,LMO3,WNT5B,DYRK1A,CD109,PHIP,ENSCHIG00000018293,HIF1A,IGFBP5,TYRO3,THBS1,BIRC6,RRM2B,ENSCHIG00000021932,CYP7B1,Y…
GO:BP	regulation of nervous system development	GO:0051960	2.17587e-09	8.66237	581	4434	245	15439	EPHA4,NDNF,SPART,RAP1GAP2,RETREG3,BMP5,KIF20B,INPP5F,LRRTM3,PAQR3,ADGRL1,GNRH1,ADRA2B,SFRP2,LRRN1,TRAF3IP1,HOOK3,BRAF,RAB21,SYT1,JADE2,PLAA,VLDLR,RECK,FYN,HIF1A,NIN,YTHDF1,LYN,RIMS1,DDX6,YAP1,MARK1,ARHGAP35,MMD,CRK,PAFAH1B1,DLG1,FN1,AMIGO1,MEIS1,SNAP25,STMN2,BDNF,BEND6,THRB,CSF1,MYLIP,NEDD4L,VSTM5,SLITRK2,EIF4E,CLSTN2,CTNNA1,PTPRS,LPAR1,ENSCHIG00000015151,UST,CAMK1D,SS18L1,TGIF2,CAPRIN1,SORL1,ZEB…
GO:BP	growth	GO:0040007	2.38096e-09	8.62325	613	4434	256	15439	PGLYRP3,ECM1,PSRC1,IGF1,LEF1,FGF7,SOCS5,SPART,SLC1A2,MYOCD,DCUN1D3,SFRP2,DDR1,PPARD,EPB41L3,SBDS,LZTS2,GAS2,SYT1,DUSP6,RBPJ,APBB2,CYFIP2,JADE2,C9ORF72,PLAA,BNC2,XPA,ENSCHIG00000018293,HIF1A,IGFBP5,NIN,PAX7,CLIC4,RIMS1,DNAJB2,YAP1,KDM5B,PTPN11,TMC8,ENSCHIG00000019133,UBE3A,TGFBR2,FN1,PPT1,GHRHR,CHST11,BDNF,MINAR1,WDR48,FOXP1,IP6K2,GPAM,RARB,CSF1,BMPR1B,ZFP36L1,PTPRJ,TNKS2,NEDD4L,SMAD4,MEX3C,PLEKHA…
GO:BP	cell morphogenesis involved in differentiation	GO:0000904	2.69408e-09	8.56959	463	4434	203	15439	ARL13B,EPHA4,LEF1,SPART,RIPOR2,ANK3,DOCK7,BRAF,RAB21,ATF4,APBB2,C9ORF72,VLDLR,FYN,NIN,TYRO3,MERTK,CLIC4,ABI1,YTHDF1,MATN2,PTPN11,ARHGAP35,CRK,PAFAH1B1,DAG1,FN1,PLPPR4,MET,BDNF,AXL,FOXP1,VSIG1,BMPR1B,NEDD9,SMAD4,PICALM,CABP4,SLITRK2,NRCAM,CRPPA,AP1AR,WDR1,PTPRS,PALLD,UST,OTX2,NRP1,SS18L1,PREX1,PREX2,CAPRIN1,IHH,PARVA,CORO1C,TCTN1,ALCAM,ZEB2,VASP,NR4A2,ENSCHIG00000017892,MAP3K13,KLF7,CREB1,MAP2,SEM…
GO:BP	regulation of cellular component biogenesis	GO:0044087	2.7383e-09	8.56252	689	4434	282	15439	PSRC1,ELAPOR1,CNOT2,CLEC7A,SLAIN2,G3BP1,ATG5,PIP4K2A,CLIP3,ANKRA2,PIK3R1,RIPOR2,LRRTM3,SPTY2D1,ADGRL1,APC,LRRN1,VPS4B,CEP76,TRAF3IP1,IKBKB,SAMD8,PPFIA1,SVIP,FNBP1L,BRAF,BBS10,EPS8,CYFIP2,C9ORF72,PHF2,DYRK1A,KAT2B,JMY,GMFB,NIN,FEZ2,RHOQ,CYRIA,PAN3,NAPB,ARFGEF1,DNAJB2,SSH1,PTPN11,ARHGAP35,ACTG1,TMC8,PPM1E,NCKAP1,ICE1,DAG1,RAP1B,DLG1,SEC22B,CAPZA1,AMIGO1,MET,PPHLN1,MNS1,SNAI2,STMN2,BDNF,RANGRF,PLD1,…
GO:BP	cellular protein metabolic process	GO:0044267	3.16164e-09	8.50009	4026	4434	1330	15439	KITLG,RIDA,RABL3,XXYLT1,ADIPOQ,DCUN1D1,NCEH1,TTC3,PPIG,EPHA4,RHBDD1,KHDRBS1,DHDDS,IQGAP3,ECM1,PSRC1,DR1,ENSCHIG00000013246,DHCR24,FKBP14,PRICKLE1,USP15,IGF1,NUAK1,YARS2,CLEC7A,BBS7,NDNF,LEF1,TBCK,LAMTOR3,PPM1K,MAPK10,TNFAIP8,ARRDC3,GALNTL6,CDC14C,IARS1,ENSCHIG00000010087,NCOA7,CDK19,AFG1L,ENSCHIG00000017313,ATG5,PPIL4,MTRF1L,HACD3,UBR1,FGF7,PPP2R5E,PAIP2B,SOCS5,ENSCHIG00000012902,EPC1,OTUD1,ITCH,…
GO:BP	positive regulation of cellular biosynthetic process	GO:0031328	3.34858e-09	8.47514	1390	4434	514	15439	CCT8,IKZF2,KHDRBS1,PSRC1,NFIA,MEOX2,POT1,IGF1,KLRK1,CLEC7A,LEF1,NR3C1,EBF2,NCOA7,TBPL1,BCLAF1,TTC5,ICE2,FGF7,EPC1,NCOA2,ABRA,EHF,RFC5,MYOCD,PIK3R1,MITF,BMP5,ENSCHIG00000008358,ONECUT2,RRN3,HGF,SLC30A9,SFRP2,MRTFB,RYBP,PPARD,BRPF3,FOXF2,CHP2,SFPQ,IKBKB,ETS1,SVIP,ARNT,NHLH2,MDFIC,NAMPT,SP1,PPP1R12A,NFYB,ATF4,RBPJ,LARP1,XPA,NR4A3,PHF2,PHIP,ENSCHIG00000018293,KAT2B,HIF1A,JMY,THBS1,MEIS2,PAX7,RHOQ,ENS…
GO:BP	positive regulation of biosynthetic process	GO:0009891	4.11561e-09	8.38557	1407	4434	519	15439	CCT8,IKZF2,KHDRBS1,PSRC1,NFIA,MEOX2,POT1,IGF1,KLRK1,CLEC7A,LEF1,NR3C1,EBF2,NCOA7,TBPL1,BCLAF1,TTC5,ICE2,FGF7,EPC1,NCOA2,ABRA,EHF,RFC5,MYOCD,PIK3R1,MITF,BMP5,ENSCHIG00000008358,ONECUT2,RRN3,HGF,SLC30A9,SFRP2,MRTFB,RYBP,PPARD,BRPF3,FOXF2,CHP2,SFPQ,IKBKB,ETS1,SVIP,ARNT,NHLH2,MDFIC,NAMPT,SP1,PPP1R12A,NFYB,ATF4,RBPJ,LARP1,XPA,NR4A3,PHF2,PHIP,ENSCHIG00000018293,KAT2B,HIF1A,JMY,THBS1,MEIS2,PAX7,RHOQ,ENS…
GO:BP	negative regulation of cell communication	GO:0010648	4.9636e-09	8.3042	911	4434	356	15439	ADIPOQ,SYT11,ECM1,FIGNL1,PRICKLE1,CNOT2,IGF1,G3BP1,GRIA1,ARRDC3,ASPN,GJA1,CRHBP,UBR1,SOCS5,SPART,ITCH,HEY1,MYOCD,ADAMTS12,BMP5,TMEM14A,RIPOR2,ONECUT2,RRN3,INPP5F,DDIAS,HGF,PAQR3,APC,TMEM64,SFRP2,CD2AP,RNF152,RNF125,TRAF3IP1,RABGEF1,ACKR3,LZTS2,DUSP4,SHANK2,BRAF,DUSP6,ENSCHIG00000008899,LMO3,WNT5B,DYRK1A,CD109,PHIP,ENSCHIG00000018293,HIF1A,IGFBP5,TYRO3,THBS1,BIRC6,RRM2B,ENSCHIG00000021932,CYP7B1,Y…
GO:BP	positive regulation of multicellular organismal process	GO:0051240	5.04275e-09	8.29733	1202	4434	452	15439	KITLG,ADIPOQ,IQGAP3,ECM1,TUT4,LURAP1,ANO6,USP15,IGF1,KLRK1,CLEC7A,NDNF,LEF1,SLC9B2,EBF2,GJA1,ATG5,FGF7,SOCS5,ITCH,PDGFC,ATXN1L,MYOCD,RETREG3,CARTPT,PIK3R1,BMP5,ENSCHIG00000008358,KIF20B,LRRTM3,HGF,ADGRL1,ADRA2B,TMEM64,SFRP2,MRTFB,LRRN1,RBM24,RNF125,ETS1,KMT5B,GLMN,F3,ARNT,BRAF,SP1,RAB21,SYT1,ATF4,RBPJ,JADE2,PLAA,VLDLR,FYN,ENSCHIG00000018293,HIF1A,GCH1,NIN,THBS1,CYP1B1,MTDH,KLF10,LYN,AGO2,RIMS1,AM…
GO:BP	localization of cell	GO:0051674	6.8598e-09	8.16369	1082	4434	412	15439	KITLG,CXCL10,ARL13B,CLDN1,ADIPOQ,ECM1,MEOX2,ANO6,IGF1,KLRK1,CLEC7A,NDNF,LEF1,SLC9B2,GJA1,FGF7,CDC42BPA,TNFSF18,CCL17,MYOCD,PIK3R1,ADAMTS12,MITF,RIPOR2,ONECUT2,PRKG1,KIF20B,INPP5F,HGF,GNRH1,APC,SFRP2,DDR1,PPARD,RABGEF1,SBDS,MCU,ETS1,DOCK7,BRAF,SP1,TIAM1,EPS8,WNT5B,APBB2,ATP8A1,PLAA,GCNT1,VPS13A,RECK,NR4A3,FYN,HIF1A,SEMA6D,IGFBP5,TYRO3,THBS1,CYP1B1,CLIC4,DACH1,MATN2,LRP12,CYP7B1,LYN,AGO2,RRAS2,AMOT…
GO:BP	cell motility	GO:0048870	6.8598e-09	8.16369	1082	4434	412	15439	KITLG,CXCL10,ARL13B,CLDN1,ADIPOQ,ECM1,MEOX2,ANO6,IGF1,KLRK1,CLEC7A,NDNF,LEF1,SLC9B2,GJA1,FGF7,CDC42BPA,TNFSF18,CCL17,MYOCD,PIK3R1,ADAMTS12,MITF,RIPOR2,ONECUT2,PRKG1,KIF20B,INPP5F,HGF,GNRH1,APC,SFRP2,DDR1,PPARD,RABGEF1,SBDS,MCU,ETS1,DOCK7,BRAF,SP1,TIAM1,EPS8,WNT5B,APBB2,ATP8A1,PLAA,GCNT1,VPS13A,RECK,NR4A3,FYN,HIF1A,SEMA6D,IGFBP5,TYRO3,THBS1,CYP1B1,CLIC4,DACH1,MATN2,LRP12,CYP7B1,LYN,AGO2,RRAS2,AMOT…
GO:BP	regulation of cellular localization	GO:0060341	7.08933e-09	8.14939	624	4434	258	15439	CXCL10,CCT8,ADIPOQ,CLDN18,RAPGEF4,DPP10,KHDRBS1,SYT11,SLC9B2,ATG5,GCC2,CACNB2,YOD1,CNST,SLC7A11,CLIP3,PIK3R1,RIPOR2,KIF20B,INPP5F,GPR137B,WAPL,CFTR,APC,LYPD1,NUP153,ILRUN,CD2AP,RABGEF1,CHP2,LZTS2,PPFIA1,SVIP,RAB3B,SCP2,BRAF,MDFIC,CACNA2D1,RAB21,SYT1,PPP1R12A,CPSF6,C2CD5,LETM1,PLAA,FYN,SNX3,UBE2J1,HIF1A,RHOQ,XPO4,NAPB,UBR5,LYN,ACSL3,PTPN11,TRPC3,ENSCHIG00000010440,FBXL20,ICE1,IWS1,RAP1B,DLG1,UHMK1…
GO:BP	vesicle-mediated transport	GO:0016192	7.93194e-09	8.10062	986	4434	380	15439	ADIPOQ,RAPGEF4,STX12,SYT11,VPS45,ANO6,CLEC7A,SLC9B2,GRIA1,STX17,ATG5,CRHBP,TMEM87A,GCC2,CACNB2,TGM2,CNST,SLC10A7,CLIP3,GOLGA5,VAPA,RAB27B,VTI1A,INPP5F,SEC23IP,CFTR,SNX18,EXOC2,VPS4B,COLEC12,RABGEF1,ACKR3,RAB11FIP2,HOOK3,VPS37A,ANK3,ITSN1,RAB3B,HOOK1,FNBP1L,BRAF,STARD3NL,RAB21,SYT1,C2CD5,PHETA2,PRSS12,SEC24A,ARF1,RAB14,C9ORF72,PLAA,VLDLR,SNX3,STON2,SYT16,TYRO3,THBS1,MERTK,AAK1,TBC1D4,NAPB,RAB22A,M…
GO:BP	cellular component biogenesis	GO:0044085	1.58484e-08	7.80001	1984	4434	699	15439	CCT8,ARL13B,CLDN1,STX12,PSRC1,ELAPOR1,POT1,LRRC4,CEP41,ANO6,CNOT2,CLEC7A,BBS7,GABRA2,SLAIN2,G3BP1,SLU7,STX17,ATG5,TBPL1,PIP4K2A,TMEM41B,RRP8,SLC1A2,AHCTF1,PDGFC,DENR,CLIP3,ENSCHIG00000023339,ANKRA2,PIK3R1,MITF,HLA-DRA,APOM,RIPOR2,ONECUT2,UBN1,RRN3,KIF11,LRRTM3,SPTY2D1,TSPYL5,ADGRL1,APC,TMEM107,HCN1,PRLR,H1-6,SMCHD1,UBAP2L,LRRN1,H1-3,NUP153,VPS4B,CEP76,EPB41L3,TRAF3IP1,SBDS,TMEM159,LZTS2,EIF3A,AGO…
GO:BP	positive regulation of cellular component organization	GO:0051130	1.96733e-08	7.70612	770	4434	306	15439	CCT8,CD53,PSRC1,ELAPOR1,POT1,ANO6,CNOT2,IGF1,CLEC7A,NDNF,SLAIN2,G3BP1,PIP4K2A,CLIP3,RETREG3,BMP5,RIPOR2,RNF40,LRRTM3,MIER1,ADGRL1,APC,LRRN1,VPS4B,SFPQ,MCU,FNBP1L,BRAF,RAB21,SYT1,C2CD5,ATP8A1,PLAA,VLDLR,FYN,HIF1A,JMY,GMFB,NIN,PAX7,RHOQ,PAN3,RAD21,LYN,RIMS1,CBL,ARHGAP35,PPM1E,PAFAH1B1,NCKAP1,ICE1,DAG1,RAP1B,DLG1,FN1,AMIGO1,PPT1,MET,PPHLN1,HMBOX1,MNS1,STMN2,BDNF,AXL,NSD3,MIEF1,PTPRJ,VPS13D,TNKS2,JAR…
GO:BP	positive regulation of macromolecule biosynthetic process	GO:0010557	2.23082e-08	7.65154	1339	4434	493	15439	CCT8,IKZF2,KHDRBS1,PSRC1,NFIA,MEOX2,POT1,IGF1,CLEC7A,LEF1,NR3C1,EBF2,NCOA7,TBPL1,BCLAF1,TTC5,ICE2,FGF7,EPC1,NCOA2,ABRA,EHF,RFC5,MYOCD,PIK3R1,MITF,BMP5,ENSCHIG00000008358,ONECUT2,RRN3,HGF,SLC30A9,SFRP2,MRTFB,RYBP,PPARD,BRPF3,FOXF2,CHP2,SFPQ,IKBKB,ETS1,SVIP,ARNT,NHLH2,MDFIC,NAMPT,SP1,PPP1R12A,NFYB,ATF4,RBPJ,LARP1,XPA,NR4A3,PHF2,PHIP,ENSCHIG00000018293,KAT2B,HIF1A,JMY,THBS1,MEIS2,PAX7,RHOQ,ENSCHIG00…
GO:BP	cellular response to growth factor stimulus	GO:0071363	2.23678e-08	7.65038	424	4434	186	15439	USP15,LEF1,NR3C1,ASPN,FGF7,SPART,MYOCD,ADAMTS12,ONECUT2,HGF,SFRP2,GAREM1,ENSCHIG00000008899,RBPJ,RGMB,CYFIP2,RAB14,CD109,FYN,HIF1A,THBS1,PRDM16,PTPN11,GLG1,EPN2,ERN1,PAX9,TGFBR2,CHST11,SOX5,RNF111,SMAD9,SNAI2,STMN2,HHIP,CAV2,BMPR1B,ZFP36L1,CASK,SMAD4,TWSG1,TGFB1I1,MAPK3,SNX25,TGFBR3,NOTCH2,FRS2,PTPRK,NRP1,PMEPA1,SORL1,LTBP4,SOX9,ENSCHIG00000017892,DDX5,CREB1,TRIM33,PDGFRA,KDR,CXCL8,LOX,SMAD5,ANXA…
GO:BP	regulation of transport	GO:0051049	2.59146e-08	7.58646	1100	4434	415	15439	CXCL10,OPRK1,ADIPOQ,RAPGEF4,KHDRBS1,SYT11,ANO6,IGF1,CLEC7A,SLC9B2,GJA1,ATG5,CRHBP,HOMER1,GCC2,CACNB2,SLC1A2,YOD1,CNST,ATP1B1,SLC7A11,CLIP3,CARTPT,PIK3R1,SLMAP,TMEM14A,RAB27B,KIF20B,INPP5F,CFTR,KCNJ16,NUP153,CD2AP,VPS4B,RABGEF1,CHP2,ANK3,MCU,SVIP,RAB3B,SCP2,GLMN,BRAF,MDFIC,CACNA2D1,KLHL24,RAB21,SYT1,PPP1R12A,CPSF6,C2CD5,CACNA1C,ATF4,ATP8A1,PLAA,NR4A3,FYN,SNX3,UBE2J1,HIF1A,STON2,THBS1,MERTK,RHOQ,AA…
GO:BP	response to growth factor	GO:0070848	2.72164e-08	7.56517	436	4434	190	15439	USP15,LEF1,NR3C1,ASPN,FGF7,SPART,MYOCD,ADAMTS12,ONECUT2,HGF,SFRP2,GAREM1,ENSCHIG00000008899,RBPJ,RGMB,CYFIP2,RAB14,CD109,FYN,HIF1A,THBS1,PRDM16,PTPN11,GLG1,EPN2,ERN1,PAX9,TGFBR2,CHST11,SOX5,RNF111,SMAD9,SNAI2,STMN2,HHIP,CAV2,BMPR1B,ZFP36L1,CASK,SMAD4,TWSG1,TGFB1I1,MAPK3,SNX25,MXRA5,MAPK1,TGFBR3,NOTCH2,FRS2,PTPRK,NRP1,PMEPA1,SORL1,LTBP4,SOX9,ENSCHIG00000017892,DDX5,CREB1,TRIM33,PDGFRA,KDR,CXCL8,LO…
GO:BP	regulation of protein phosphorylation	GO:0001932	3.4623e-08	7.46064	953	4434	366	15439	KITLG,ADIPOQ,EPHA4,IQGAP3,PSRC1,IGF1,LAMTOR3,FGF7,SOCS5,ITCH,PKIA,TNFSF18,PDGFC,CLIP3,MYOCD,CARTPT,BMP5,INPP5F,HGF,PAQR3,APC,ADRA2B,SFRP2,LCP2,PRLR,CACUL1,GAREM1,TRAF3IP1,EEF2K,RABGEF1,ACKR3,DUSP4,DOCK7,PRKAG2,BRAF,MDFIC,DUSP6,LMO3,PJA2,C9ORF72,VLDLR,CD109,FYN,KAT2B,GRM1,STYX,THBS1,ABI1,LYN,PTPN11,MMD,PPM1E,PAFAH1B1,ERN1,DAG1,TGFBR2,RAP1B,SAMSN1,DLG1,FN1,INKA2,PWP1,PKD2,TEC,BDNF,HIPK3,STRADA,CSF1…
GO:BP	cell projection morphogenesis	GO:0048858	3.79109e-08	7.42124	401	4434	177	15439	EPHA4,SPART,KIF20B,DDR1,EPB41L3,ANK3,DOCK7,BRAF,RAB21,SYT1,APBB2,CYFIP2,JADE2,C9ORF72,PLAA,VLDLR,FYN,NIN,ABI1,YTHDF1,MATN2,RIMS1,WEE1,PTPN11,ARHGAP35,PAFAH1B1,DAG1,FN1,PLPPR4,BDNF,FOXP1,BMPR1B,NEDD4L,SMAD4,PICALM,SLITRK2,NRCAM,CRPPA,SNX2,PTPRS,PALLD,UST,OTX2,NRP1,SS18L1,PREX2,CAPRIN1,CORO1C,TCTN1,ALCAM,ZEB2,VASP,NR4A2,MAP3K13,KLF7,CREB1,MAP2,SEMA3A,PPFIA2,MYOT,WDR36,NFIB,SLITRK6,FLRT3,PAX6,CHL1,S…
GO:BP	cell death	GO:0008219	3.92399e-08	7.40627	1272	4434	470	15439	KITLG,CXCL10,ADIPOQ,RHBDD1,DHCR24,TM2D1,FIGNL1,ANO6,IGF1,CLEC7A,NDNF,LEF1,TNFAIP8,NCOA7,ATG5,BCLAF1,ITCH,TGM2,ADNP,RRP8,SLC7A11,CLIP3,MYOCD,PIK3R1,GZMA,MITF,PDE12,TMEM14A,VAPA,RRN3,DCUN1D3,DDIAS,HGF,RFK,APC,SFRP2,PRLR,RYBP,PPARD,VPS4B,RNF152,ACKR3,SFPQ,POLB,GAS2,ITSN1,F3,SLC25A24,HIPK1,BRAF,ENSCHIG00000025853,DUSP6,ATF4,CASP6,APBB2,GABRB2,CYFIP2,XPA,PHIP,FYN,ENSCHIG00000018293,HIF1A,TYRO3,THBS1,M…
GO:BP	plasma membrane bounded cell projection morphogenesis	GO:0120039	4.62233e-08	7.33514	399	4434	176	15439	EPHA4,SPART,KIF20B,DDR1,EPB41L3,ANK3,DOCK7,BRAF,RAB21,SYT1,APBB2,CYFIP2,JADE2,C9ORF72,PLAA,VLDLR,FYN,NIN,ABI1,YTHDF1,MATN2,RIMS1,WEE1,PTPN11,ARHGAP35,PAFAH1B1,DAG1,FN1,PLPPR4,BDNF,FOXP1,BMPR1B,NEDD4L,SMAD4,PICALM,SLITRK2,NRCAM,CRPPA,SNX2,PTPRS,PALLD,UST,OTX2,NRP1,SS18L1,PREX2,CAPRIN1,CORO1C,TCTN1,ALCAM,ZEB2,VASP,NR4A2,MAP3K13,KLF7,CREB1,MAP2,SEMA3A,PPFIA2,MYOT,WDR36,NFIB,SLITRK6,FLRT3,PAX6,CHL1,S…
GO:BP	cell part morphogenesis	GO:0032990	4.91648e-08	7.30835	416	4434	182	15439	EPHA4,SPART,KIF20B,DDR1,EPB41L3,ANK3,DOCK7,BRAF,RAB21,SYT1,APBB2,CYFIP2,JADE2,C9ORF72,PLAA,VLDLR,FYN,CERT1,NIN,ABI1,YTHDF1,MATN2,RIMS1,WEE1,PTPN11,ARHGAP35,PAFAH1B1,DAG1,FN1,PLPPR4,BDNF,FOXP1,BMPR1B,NEDD4L,SMAD4,PICALM,SLITRK2,NRCAM,CRPPA,SNX2,PTPRS,PALLD,UST,OTX2,NRP1,SS18L1,PREX2,CAPRIN1,CORO1C,TCTN1,ALCAM,ZEB2,VASP,NR4A2,PID1,MAP3K13,KLF7,CREB1,MAP2,SEMA3A,PPFIA2,MYOT,WDR36,NFIB,SLITRK6,FLRT3,…
GO:BP	tube morphogenesis	GO:0035239	5.56678e-08	7.2544	611	4434	250	15439	CXCL10,ARL13B,EPHA4,ECM1,MEOX2,PRICKLE1,NDNF,LEF1,TGM2,HEY1,MYOCD,ADAMTS12,KIF20B,SFRP2,DDR1,GREB1L,ACKR3,LZTS2,ETS1,GLMN,F3,SP1,RBPJ,RECK,QKI,HIF1A,THBS1,CYP1B1,CLIC4,MTDH,AGO2,YAP1,KDM5B,ARHGAP35,ACTG1,VEZF1,EPN2,DAG1,TGFBR2,DLG1,ATF2,MET,PKD2,RSPO3,RHOJ,MEIS1,HHIP,MINAR1,FOXP1,EMX2,CSF1,RASA1,ZFP36L1,C6,SMAD4,ADAM12,NOTCH2,HOXA3,NRCAM,E2F7,ARID2,ENSCHIG00000021309,KRAS,SASH1,THBS2,SOS1,PAX8,NR…
GO:BP	programmed cell death	GO:0012501	6.25822e-08	7.20355	1189	4434	442	15439	KITLG,CXCL10,ADIPOQ,RHBDD1,DHCR24,TM2D1,FIGNL1,ANO6,IGF1,CLEC7A,NDNF,LEF1,TNFAIP8,ATG5,BCLAF1,ITCH,TGM2,ADNP,RRP8,SLC7A11,CLIP3,MYOCD,PIK3R1,GZMA,MITF,TMEM14A,RRN3,DCUN1D3,DDIAS,HGF,RFK,APC,SFRP2,PRLR,RYBP,PPARD,RNF152,ACKR3,SFPQ,POLB,GAS2,ITSN1,F3,HIPK1,BRAF,ENSCHIG00000025853,DUSP6,ATF4,CASP6,APBB2,GABRB2,CYFIP2,XPA,PHIP,ENSCHIG00000018293,HIF1A,TYRO3,THBS1,MERTK,BIRC6,CYP1B1,NACC2,SAP18,NAA16,…
GO:BP	heart development	GO:0007507	6.45041e-08	7.19041	367	4434	164	15439	ARL13B,PRICKLE1,IGF1,GJA1,ATG5,MYOCD,PDLIM3,SFRP2,RBM24,DSG2,GREB1L,TRAF3IP1,DUSP6,CACNA1C,RBPJ,HIF1A,CERT1,HSPB7,YAP1,PTPN11,SALL1,TGFBR2,ATF2,PKD2,PCSK5,ADGRG6,TRIP11,FOXP1,RARB,ZFP36L1,SMAD4,MAPK3,MAPK1,TGFBR3,NOTCH2,ARID2,FRS2,SOS1,STK3,IHH,PARVA,HNRNPU,AP1B1,SOX9,AKAP13,EGFR,CREB1,HTR2B,NPY1R,PDGFRA,LOX,FLRT3,ADM,UBE4B,TMEM100,ADAMTS6,SRF,ANKRD1,CASP7,ADAMTS1,SMAD3,PROX1,FOXC1,DSP,SOX4,MIB1,…
GO:BP	negative regulation of response to stimulus	GO:0048585	8.10494e-08	7.09125	1114	4434	417	15439	ADIPOQ,EPHA4,SYT11,PGLYRP3,ECM1,FIGNL1,PRICKLE1,CNOT2,IGF1,KLRK1,G3BP1,ARRDC3,ASPN,NCOA7,NT5E,CRHBP,UBR1,SOCS5,SPART,ITCH,HEY1,YOD1,SLC7A11,MYOCD,CARTPT,ADAMTS12,BMP5,TMEM14A,RIPOR2,ONECUT2,RRN3,PRKG1,INPP5F,DDIAS,HGF,PAQR3,APC,TMEM64,SFRP2,SMCHD1,ILRUN,CD2AP,RNF152,RNF125,TRAF3IP1,RABGEF1,ACKR3,LZTS2,DUSP4,ETS1,SVIP,DUSP6,ENSCHIG00000008899,LMO3,WNT5B,USP25,DYRK1A,CD109,PHIP,ENSCHIG00000018293,U…
GO:BP	animal organ morphogenesis	GO:0009887	8.68824e-08	7.06107	725	4434	288	15439	ARL13B,LEF1,ASPN,FGF7,TGM2,PDGFC,SSUH2,RIPOR2,HGF,SFRP2,DDR1,FOXF2,GREB1L,LZTS2,POLB,HIPK1,LHX8,ATF4,RBPJ,GCNT1,ENSCHIG00000018293,HIF1A,CERT1,IGFBP5,PAX7,CYP7B1,YAP1,LHX9,KDM5B,GLG1,SALL1,PAFAH1B1,PAX9,DAG1,TGFBR2,DLG1,ATF2,CHST11,PKD2,ADGRG6,MEIS1,E2F5,BDNF,HHIP,TRIP11,WDR48,EMX2,RARB,THRB,CSF1,BMPR1B,NAB1,SMAD4,TWSG1,MAPK3,PLEKHA1,HMX2,FLI1,CABP4,MAPK1,TGFBR3,GNAT2,NOTCH2,HOXA3,ENSCHIG00000026…
GO:BP	developmental growth	GO:0048589	9.73403e-08	7.01171	447	4434	192	15439	ECM1,IGF1,FGF7,SPART,SLC1A2,SFRP2,DDR1,PPARD,SBDS,LZTS2,GAS2,SYT1,DUSP6,RBPJ,CYFIP2,JADE2,C9ORF72,PLAA,BNC2,XPA,ENSCHIG00000018293,NIN,PAX7,CLIC4,RIMS1,YAP1,KDM5B,PTPN11,UBE3A,TGFBR2,FN1,GHRHR,CHST11,BDNF,WDR48,FOXP1,GPAM,RARB,CSF1,BMPR1B,ZFP36L1,TNKS2,NEDD4L,SMAD4,MEX3C,PLEKHA1,ERCC6,NOTCH2,ARID2,EVC,PTPRS,SOS1,STK3,IHH,ZEB2,GPD2,SOX9,RAI1,SP2,MAP3K13,PIK3CA,SLC4A10,CREB1,MAP2,DDR2,SEMA3A,SOCS2,…
GO:BP	cell morphogenesis involved in neuron differentiation	GO:0048667	1.10597e-07	6.95626	358	4434	160	15439	EPHA4,SPART,RIPOR2,ANK3,DOCK7,BRAF,RAB21,APBB2,C9ORF72,VLDLR,FYN,NIN,ABI1,YTHDF1,MATN2,PTPN11,ARHGAP35,PAFAH1B1,DAG1,FN1,PLPPR4,BDNF,FOXP1,BMPR1B,SMAD4,PICALM,CABP4,SLITRK2,NRCAM,CRPPA,PTPRS,PALLD,UST,OTX2,NRP1,SS18L1,PREX2,CAPRIN1,TCTN1,ALCAM,ZEB2,VASP,NR4A2,MAP3K13,KLF7,CREB1,MAP2,SEMA3A,PPFIA2,MYOT,WDR36,NFIB,SLITRK6,FLRT3,PAX6,CHL1,SRF,SPAST,LIMK1,CDHR1,HES1,HOXA2,CAPRIN2,EPHA5,EFNA5,FSTL4,AP…
GO:BP	peptidyl-amino acid modification	GO:0018193	1.13413e-07	6.94534	879	4434	339	15439	KITLG,PPIG,EPHA4,DR1,FKBP14,IGF1,NDNF,LEF1,GALNTL6,NCOA7,ATG5,PPIL4,FGF7,SOCS5,EPC1,TNFSF18,PDGFC,CLIP3,MYOCD,NMT1,INPP5F,HGF,PAQR3,SFRP2,TTLL6,PRLR,DDR1,NAA50,FKBP5,BRPF3,ESCO1,SMG1,IKBKB,KMT5B,RAB3B,DOCK7,ARNT,PRKAG2,TTLL8,KDM4B,DYRK1A,FYN,UBE2J1,KAT2B,NAA30,TYRO3,MERTK,ABI1,ASPH,LYN,RAB6A,WEE1,PRDM16,PTPN11,SETD6,DPH1,ERN1,IWS1,TGFBR2,SAMSN1,ATF2,UHMK1,MET,PWP1,TEC,ZDHHC21,CAMKMT,SETDB2,BDNF,H…
GO:BP	regulation of neurogenesis	GO:0050767	1.15557e-07	6.9372	499	4434	210	15439	EPHA4,NDNF,SPART,RAP1GAP2,RETREG3,BMP5,KIF20B,INPP5F,PAQR3,GNRH1,ADRA2B,SFRP2,HOOK3,BRAF,RAB21,SYT1,JADE2,PLAA,VLDLR,FYN,HIF1A,NIN,YTHDF1,LYN,RIMS1,DDX6,YAP1,MARK1,ARHGAP35,MMD,CRK,PAFAH1B1,FN1,MEIS1,SNAP25,STMN2,BDNF,BEND6,THRB,CSF1,MYLIP,NEDD4L,EIF4E,CTNNA1,PTPRS,LPAR1,ENSCHIG00000015151,UST,CAMK1D,SS18L1,TGIF2,CAPRIN1,SORL1,ZEB2,SOX9,SPAG9,PTPN9,EPHA3,NEPRO,BCL6,MAP3K13,ECT2,NEUROD1,MAP2,PRUNE…
GO:BP	transforming growth factor beta receptor signaling pathway	GO:0007179	1.21166e-07	6.91662	133	4434	74	15439	USP15,ASPN,MYOCD,ONECUT2,ENSCHIG00000008899,CD109,THBS1,PRDM16,GLG1,TGFBR2,CHST11,RNF111,SMAD9,CAV2,SMAD4,TWSG1,TGFB1I1,SNX25,TGFBR3,PTPRK,PMEPA1,LTBP4,TRIM33,LOX,SMAD5,NPNT,VEPH1,SMAD3,ING2,CDKN1C,LEMD3,EP300,FERMT2,FBN1,LTBP1,SPRED2,ZEB1,BAMBI,SRC,LRRC32,CIDEA,APPL2,ZBTB7A,TGFBR1,MTMR4,ITGA3,CDH5,ZNF451,ADAM17,TP53,DAB2,IL17RD,PDPK1,ZNF703,PBLD,JUN,FBN2,FERMT1,PTK2,TGFB2,SKI,SMAD1,NLK,SMURF2,AC…
GO:BP	cellular response to transforming growth factor beta stimulus	GO:0071560	1.24167e-07	6.90599	160	4434	85	15439	USP15,NR3C1,ASPN,MYOCD,ONECUT2,ENSCHIG00000008899,CD109,FYN,THBS1,PRDM16,GLG1,TGFBR2,CHST11,SOX5,RNF111,SMAD9,CAV2,ZFP36L1,SMAD4,TWSG1,TGFB1I1,SNX25,TGFBR3,PTPRK,PMEPA1,LTBP4,SOX9,TRIM33,LOX,SMAD5,ANKRD1,NPNT,VEPH1,SMAD3,ING2,CDKN1C,LEMD3,EP300,FERMT2,FBN1,LTBP1,SPRED2,ZEB1,BAMBI,SRC,LRRC32,CIDEA,APPL2,ZBTB7A,TGFBR1,MTMR4,ITGA3,CDH5,ZNF451,MEF2C,ADAM17,TP53,DAB2,ZFP36L2,IL17RD,PDPK1,SFRP1,ZNF703,…
GO:BP	response to transforming growth factor beta	GO:0071559	1.25133e-07	6.90263	165	4434	87	15439	USP15,NR3C1,ASPN,MYOCD,ONECUT2,ENSCHIG00000008899,CD109,FYN,THBS1,PRDM16,GLG1,TGFBR2,CHST11,SOX5,RNF111,SMAD9,CAV2,ZFP36L1,SMAD4,TWSG1,TGFB1I1,SNX25,MXRA5,TGFBR3,PTPRK,PMEPA1,LTBP4,SOX9,TRIM33,LOX,SMAD5,ANKRD1,NPNT,VEPH1,SMAD3,ING2,CDKN1C,LEMD3,EP300,FERMT2,FBN1,LTBP1,SPRED2,ZEB1,BAMBI,SRC,LRRC32,CIDEA,APPL2,ZBTB7A,TGFBR1,MTMR4,ITGA3,CDH5,ZNF451,MEF2C,ADAM17,TP53,DAB2,ZFP36L2,IL17RD,PDPK1,SFRP1,Z…
GO:BP	nucleic acid metabolic process	GO:0090304	1.30015e-07	6.88601	3755	4434	1235	15439	RIDA,CCT8,ADIPOQ,EPC2,ORC4,IKZF2,KHDRBS1,ECM1,PSRC1,DR1,NFIA,TUT4,FIGNL1,MEOX2,TWISTNB,HBP1,POT1,PRICKLE1,CNOT2,IGF1,YARS2,BBS7,LEF1,TRMT10A,KLF3,THAP9,NR3C1,SLU7,ZBTB5,EBF2,IARS1,NCOA7,ENSCHIG00000017313,TBPL1,BCLAF1,TTC5,ICE2,FGF7,ENSCHIG00000018361,ENSCHIG00000027081,EPC1,ITCH,NCOA2,HEY1,ABRA,ESRP1,RRP8,TRIM21,CSTF3,EHF,AHCTF1,EXO1,GTF2H3,SBNO1,RFC5,ZFP1,ENSCHIG00000021323,ATXN1L,ZFP30,ENSCHIG…
GO:BP	intracellular transport	GO:0046907	1.31211e-07	6.88203	895	4434	344	15439	ADIPOQ,MAIP1,RHBDD1,KHDRBS1,STX12,MREG,PRICKLE1,SLU7,STX17,XPO7,TMEM87A,BLOC1S6,GCC2,ABRA,YOD1,ENSCHIG00000023339,PIK3R1,NUP155,VAPA,KIF20B,VTI1A,INPP5F,SEC23IP,APPBP2,SNX18,NUP153,ATXN1,VPS4B,RABGEF1,CHP2,LZTS2,CCDC186,HOOK3,VPS37A,TOMM20,SVIP,SCP2,HOOK1,FNBP1L,MDFIC,RAB21,PPP1R12A,CPSF6,C2CD5,PHETA2,NUP50,TMEM129,PURA,SEC24A,RAB14,FYN,SNX3,UBE2J1,HIF1A,STYX,CERT1,RAB8B,ENSCHIG00000023777,XPO4,P…
GO:BP	positive regulation of protein metabolic process	GO:0051247	1.57373e-07	6.80307	1088	4434	407	15439	KITLG,ADIPOQ,DCUN1D1,EPHA4,RHBDD1,KHDRBS1,IQGAP3,PSRC1,PRICKLE1,IGF1,CLEC7A,BBS7,LAMTOR3,ARRDC3,FGF7,SOCS5,ITCH,TNFSF18,PDGFC,CLIP3,CARTPT,BMP5,RNF40,LRRTM3,TSPYL5,HGF,APC,ADRA2B,SFRP2,LCP2,PRLR,CACUL1,GAREM1,ACKR3,SVIP,DOCK7,F3,ARNT,PRKAG2,BRAF,MDFIC,SP1,PPP1R12A,PJA2,CYFIP2,LARP1,PTBP1,VLDLR,DYRK1A,FYN,GRM1,THBS1,PAX7,ABI1,YTHDF1,ARFGEF1,ASPH,LYN,PTPN11,MMD,ERN1,UBE3A,NFKBIA,TGFBR2,RAP1B,DLG1,F…
GO:BP	macromolecule catabolic process	GO:0009057	1.87882e-07	6.72611	840	4434	325	15439	RIDA,TTC3,EPHA4,RHBDD1,PGLYRP3,TUT4,PRICKLE1,USP15,BBS7,AFG1L,UBR1,SOCS5,ITCH,YOD1,ENC1,GZMA,ADAMTS12,PDE12,TRIM25,CAMLG,APC,UBR3,ANGEL2,CACUL1,RYBP,RBM24,FOXF2,VPS4B,RNF125,FBXL19,SMG1,RNF216,ATE1,IDE,CPEB3,AGO3,VPS37A,SVIP,USP1,GLMN,TENT5C,TMEM129,LARP1,ETF1,CTSB,PLAA,VPS13A,USP25,FYN,SNX3,UBE2J1,SYNCRIP,STYX,USP34,PCYOX1,PAN3,NUDT15,WAC,AGO2,CBL,PLEKHG5,RC3H1,EDEM3,MEIOC,UBE3A,AZIN1,SEC22B,ENS…
GO:BP	negative regulation of multicellular organismal process	GO:0051241	1.88623e-07	6.7244	825	4434	320	15439	CXCL10,ADIPOQ,CLDN18,EPHA4,SYT11,PGLYRP3,ECM1,MEOX2,PRICKLE1,IGF1,LEF1,ARRDC3,ASPN,GJA1,CRHBP,SOCS5,SPART,RAP1GAP2,MYOCD,CARTPT,PIK3R1,ADAMTS12,APOM,PRKG1,INPP5F,HGF,PAQR3,GNRH1,TMEM64,SFRP2,ILRUN,CD2AP,RNF125,TRAF3IP1,RABGEF1,HOOK3,ATF4,RBPJ,HIF1A,IGFBP5,THBS1,MEIS2,MERTK,LYN,DDX6,RC3H1,PTPN11,TMEM131L,NFATC3,TRPV3,EPN2,NFKBIA,ATF2,FN1,MEIS1,SNAI2,STMN2,BDNF,AXL,MINAR1,FOXP1,ABHD6,RARB,THRB,PLAU…
GO:BP	neuron projection morphogenesis	GO:0048812	1.93876e-07	6.71248	388	4434	170	15439	EPHA4,SPART,KIF20B,DDR1,EPB41L3,ANK3,DOCK7,BRAF,RAB21,SYT1,APBB2,CYFIP2,JADE2,C9ORF72,PLAA,VLDLR,FYN,NIN,ABI1,YTHDF1,MATN2,RIMS1,WEE1,PTPN11,ARHGAP35,PAFAH1B1,DAG1,FN1,PLPPR4,BDNF,FOXP1,BMPR1B,NEDD4L,SMAD4,PICALM,SLITRK2,NRCAM,CRPPA,PTPRS,PALLD,UST,OTX2,NRP1,SS18L1,PREX2,CAPRIN1,TCTN1,ALCAM,ZEB2,VASP,NR4A2,MAP3K13,KLF7,CREB1,MAP2,SEMA3A,PPFIA2,MYOT,WDR36,NFIB,SLITRK6,FLRT3,PAX6,CHL1,SRF,SYT4,SPAS…
GO:BP	cellular process	GO:0009987	2.00563e-07	6.69775	14184	4434	4169	15439	CD36,KITLG,RIDA,CXCL10,OPRK1,CCT8,ARL13B,SLC35A5,ATP6V1A,RABL3,XXYLT1,CLDN1,ADIPOQ,DCUN1D1,ENSCHIG00000020065,NCEH1,CLDN18,TTC3,RAPGEF4,PPIG,EPC2,ORC4,CXCR4,DPP10,MAIP1,ENSCHIG00000020570,ORC2,ABI2,ENSCHIG00000017628,IKZF2,EPHA4,RHBDD1,KHDRBS1,STX12,DHDDS,MREG,IQGAP3,SYT11,PGLYRP3,ECM1,ANP32E,VPS45,HAO2,CD53,PSRC1,ELAPOR1,COL11A1,DR1,ENSCHIG00000013246,NFIA,DHCR24,TUT4,TM2D1,LURAP1,FIGNL1,MEOX2,T…
GO:BP	nucleobase-containing compound biosynthetic process	GO:0034654	2.23061e-07	6.65158	2936	4434	985	15439	CCT8,ATP6V1A,ADIPOQ,EPC2,IKZF2,KHDRBS1,ECM1,PSRC1,DR1,NFIA,TUT4,MEOX2,TWISTNB,HBP1,POT1,PRICKLE1,CNOT2,IGF1,BBS7,LEF1,KLF3,NR3C1,ZBTB5,EBF2,NCOA7,ENSCHIG00000020077,TBPL1,BCLAF1,NT5E,TTC5,ICE2,FGF7,ENSCHIG00000018361,ENSCHIG00000027081,EPC1,ITCH,NCOA2,HEY1,ABRA,RRP8,TRIM21,EHF,AHCTF1,GTF2H3,SBNO1,RFC5,ZFP1,ATXN1L,ZFP30,ENSCHIG00000017808,MYOCD,MBTD1,PIK3R1,ZNF445,MITF,BMP5,ENSCHIG00000008358,ONEC…
GO:BP	positive regulation of signaling	GO:0023056	2.88606e-07	6.53969	1157	4434	428	15439	KITLG,ADIPOQ,CXCR4,EPHA4,IQGAP3,LURAP1,USP15,IGF1,LAMTOR3,TMEM33,BCLAF1,CACNB2,ABRA,TNFSF18,MYOCD,MPP2,CARTPT,PIK3R1,BMP5,INPP5F,GPR137B,TSPYL5,TRIM25,HGF,CFTR,ADRA2B,SFRP2,PRLR,PPARD,GAREM1,SEH1L,ACKR3,CHP2,SFPQ,AGO3,IKBKB,MCU,SHANK2,ITSN1,RAB3B,GLMN,F3,BRAF,MDFIC,SYT1,LMO3,RBPJ,PJA2,CYFIP2,TXNDC15,PTBP1,RECK,FYN,GRM1,HIF1A,IGFBP5,THBS1,CYP1B1,USP34,AAK1,NACC2,YTHDF1,MTDH,UBR5,LYN,CBL,YAP1,RC3H1…
GO:BP	apoptotic process	GO:0006915	2.92001e-07	6.53462	1154	4434	427	15439	KITLG,CXCL10,ADIPOQ,RHBDD1,DHCR24,TM2D1,FIGNL1,ANO6,IGF1,CLEC7A,NDNF,LEF1,TNFAIP8,ATG5,BCLAF1,ITCH,TGM2,ADNP,RRP8,SLC7A11,CLIP3,MYOCD,PIK3R1,GZMA,MITF,TMEM14A,RRN3,DCUN1D3,DDIAS,HGF,RFK,APC,SFRP2,PRLR,RYBP,PPARD,RNF152,ACKR3,SFPQ,POLB,GAS2,ITSN1,F3,HIPK1,BRAF,ENSCHIG00000025853,DUSP6,ATF4,CASP6,APBB2,GABRB2,CYFIP2,XPA,PHIP,ENSCHIG00000018293,HIF1A,TYRO3,THBS1,MERTK,BIRC6,CYP1B1,NACC2,SAP18,NAA16,…
GO:BP	positive regulation of transcription by RNA polymerase II	GO:0045944	2.9499e-07	6.53019	876	4434	336	15439	IKZF2,NFIA,MEOX2,IGF1,LEF1,NR3C1,EBF2,NCOA7,TBPL1,TTC5,EPC1,NCOA2,ABRA,EHF,MYOCD,PIK3R1,MITF,BMP5,ENSCHIG00000008358,ONECUT2,SLC30A9,SFRP2,MRTFB,FOXF2,CHP2,SFPQ,IKBKB,ETS1,ARNT,NHLH2,NAMPT,SP1,PPP1R12A,NFYB,ATF4,RBPJ,XPA,NR4A3,PHIP,ENSCHIG00000018293,KAT2B,HIF1A,MEIS2,PAX7,RHOQ,KLF10,AGO2,NPAT,YAP1,SALL1,NFATC3,VEZF1,CREBRF,TP53BP1,UBE3A,PAX9,NFKBIA,ARID3B,NR2C2,ZNF148,ATF2,CARF,GMEB1,MET,PKD2,RF…
GO:BP	heterocycle biosynthetic process	GO:0018130	3.0285e-07	6.51877	2992	4434	1001	15439	CCT8,ATP6V1A,ADIPOQ,EPC2,IKZF2,KHDRBS1,ECM1,PSRC1,DR1,NFIA,TUT4,MEOX2,TWISTNB,HBP1,POT1,PRICKLE1,CNOT2,IGF1,BBS7,LEF1,KLF3,NR3C1,ZBTB5,EBF2,NCOA7,ENSCHIG00000020077,TBPL1,BCLAF1,NT5E,TTC5,ICE2,FGF7,ENSCHIG00000018361,ENSCHIG00000027081,EPC1,ITCH,NCOA2,HEY1,ABRA,RRP8,TRIM21,EHF,AHCTF1,GTF2H3,SBNO1,RFC5,ZFP1,ATXN1L,ZFP30,ENSCHIG00000017808,MYOCD,MBTD1,PIK3R1,ZNF445,MITF,BMP5,ENSCHIG00000008358,ONEC…
GO:BP	embryo development	GO:0009790	3.07116e-07	6.5127	777	4434	303	15439	KITLG,ARL13B,ADIPOQ,COL11A1,MEOX2,PRICKLE1,CNOT2,IGF1,LEF1,GJA1,PDGFC,NMT1,RIPOR2,RRN3,KIF20B,UBR3,SFRP2,TMEM107,FOXF2,TRAF3IP1,SBDS,GLMN,HIPK1,ARNT,CACNA1C,ATF4,RBPJ,RAB14,RECK,HIF1A,CERT1,PAX7,AFF3,BIRC6,LPAR6,PCDH8,ABI1,YAP1,SALL1,ARHGAP35,PAFAH1B1,DAG1,TGFBR2,DLG1,FN1,CHST11,PKD2,PCSK5,RSPO3,DNMT3A,SRSF1,HOXB9,WDR48,FOXP1,RARB,ZFP36L1,C6,SP9,SMAD4,TWSG1,TGFB1I1,MAPK3,HMX2,PLPP4,MAPK1,NOTCH2,H…
GO:BP	negative regulation of transcription by RNA polymerase II	GO:0000122	3.19057e-07	6.49613	623	4434	251	15439	KHDRBS1,DR1,CNOT2,LEF1,KLF3,NR3C1,ZBTB5,EPC1,NCOA2,HEY1,ATXN1L,MYOCD,MITF,LCOR,RYBP,PPARD,SFPQ,CPEB3,ENSCHIG00000008899,CBX6,ATF4,RBPJ,GATAD2A,PCBP3,ENSCHIG00000018293,SATB1,BCL11A,NACC2,DACH1,TAF3,MTDH,PRDM16,SALL1,NFATC3,DLX4,NR2C2,ZNF148,DLG1,CBX5,HMBOX1,TCF23,DNMT3A,SNAI2,PER3,FOXP1,RARB,THRB,ENSCHIG00000007799,CBX8,JARID2,SMAD4,TCF7L2,NOTCH2,PIAS3,E2F7,BACH1,MYT1L,AJUBA,KCNIP3,MXD1,CREM,TGIF…
GO:BP	regulation of catabolic process	GO:0009894	3.22992e-07	6.49081	585	4434	238	15439	RIDA,EPHA4,ELAPOR1,PRICKLE1,IGF1,BBS7,SLC4A4,ATG5,SOCS5,PIP4K2A,ITCH,TRIM21,YOD1,PDE12,GPR137B,CAMLG,APC,ANGEL2,RYBP,RBM24,FOXF2,RNF152,CPEB3,SVIP,GLMN,TENT5C,PRKAG2,LARP1,C9ORF72,XPA,USP25,FYN,ENSCHIG00000018293,SNX3,UBE2J1,SYNCRIP,HIF1A,STYX,FEZ2,NUDT15,WAC,MTDH,AGO2,PLEKHG5,RC3H1,ULK2,MEIOC,UBE3A,AZIN1,SEC22B,DRAM1,UBQLN1,PSMF1,DTL,RNF185,ZFP36L1,VPS13D,PIKFYVE,ATP6V0A1,EDEM1,MYLIP,MAPK3,ERCC4…
GO:BP	positive regulation of response to stimulus	GO:0048584	3.43044e-07	6.46465	1404	4434	507	15439	KITLG,CXCL10,CLDN1,MASP1,ADIPOQ,CXCR4,EPHA4,KHDRBS1,IQGAP3,LURAP1,NAPEPLD,ANO6,USP15,IGF1,KLRK1,CLEC7A,LAMTOR3,TMEM33,BCLAF1,SOCS5,ABRA,TNFSF18,MYOCD,CARTPT,PIK3R1,BMP5,ENSCHIG00000008358,RIPOR2,GPR137B,TSPYL5,TRIM25,HGF,CFTR,ADRA2B,SFRP2,LCP2,PRLR,SMCHD1,PPARD,GAREM1,SEH1L,RABGEF1,ACKR3,CHP2,SFPQ,AGO3,IKBKB,MCU,ETS1,KMT5B,ITSN1,F3,BRAF,MDFIC,LMO3,RBPJ,PJA2,CYFIP2,TXNDC15,PTBP1,RECK,FYN,ENSCHIG00…
GO:BP	regulation of organelle organization	GO:0033043	3.97622e-07	6.40053	887	4434	339	15439	CCT8,PSRC1,ELAPOR1,POT1,CNOT2,IGF1,TMEM33,SLAIN2,G3BP1,ATG5,PIP4K2A,CLIP3,MYOCD,PIK3R1,TMEM14A,RNF40,KIF20B,KIF11,WAPL,SPTY2D1,MIER1,HGF,APC,CD2AP,VPS4B,CEP76,TRAF3IP1,SMG1,SFPQ,MCU,PPFIA1,BRAF,C2CD5,EPS8,CEP70,CYFIP2,KDM4B,C9ORF72,PHF2,DYRK1A,KAT2B,HIF1A,JMY,GMFB,NIN,PAX7,FEZ2,CYRIA,PAN3,UBR5,RAD21,ARFGEF1,SSH1,MAP9,ARHGAP35,ACTG1,BAIAP2,PPM1E,CRK,PAFAH1B1,TLK1,NCKAP1,IWS1,DLG1,SEC22B,CAPZA1,MET…
GO:BP	aromatic compound biosynthetic process	GO:0019438	4.01748e-07	6.39605	2992	4434	1000	15439	CCT8,ATP6V1A,ADIPOQ,EPC2,IKZF2,KHDRBS1,ECM1,PSRC1,DR1,NFIA,TUT4,MEOX2,TWISTNB,HBP1,POT1,PRICKLE1,CNOT2,IGF1,BBS7,LEF1,KLF3,NR3C1,ZBTB5,EBF2,NCOA7,ENSCHIG00000020077,TBPL1,BCLAF1,NT5E,TTC5,ICE2,FGF7,ENSCHIG00000018361,ENSCHIG00000027081,EPC1,ITCH,NCOA2,HEY1,ABRA,RRP8,TRIM21,EHF,AHCTF1,SLC7A11,GTF2H3,SBNO1,RFC5,ZFP1,ATXN1L,ZFP30,ENSCHIG00000017808,MYOCD,MBTD1,PIK3R1,ZNF445,MITF,BMP5,ENSCHIG00000008…
GO:BP	regulation of trans-synaptic signaling	GO:0099177	4.20403e-07	6.37633	230	4434	111	15439	ADIPOQ,EPHA4,LRRC4,GRIA1,HOMER1,CACNB2,SLC7A11,MPP2,SHANK2,RIN1,RAB3B,BRAF,SYT1,ATF4,FYN,NAPB,YTHDF1,PLEKHG5,BAIAP2,ENSCHIG00000010440,FBXL20,RAP1B,DGKB,SNAP25,BDNF,ABHD6,KCTD13,NETO1,CASK,SYT7,MAPK1,SYP,SLC4A8,KRAS,CLSTN2,PTPRS,CPLX2,PCDH17,SLC8A2,CACNG5,SLC4A10,ENSCHIG00000013367,KIF5B,ATP2A2,SRF,RAP1A,PRKCB,VHL,CELF4,GRID2,APP,NTRK2,CNR1,AKAP12,F2R,PRKCE,ITGB1,SHANK1,SLC1A3,FAM107A,ENSCHIG0000…
GO:BP	modulation of chemical synaptic transmission	GO:0050804	4.20403e-07	6.37633	230	4434	111	15439	ADIPOQ,EPHA4,LRRC4,GRIA1,HOMER1,CACNB2,SLC7A11,MPP2,SHANK2,RIN1,RAB3B,BRAF,SYT1,ATF4,FYN,NAPB,YTHDF1,PLEKHG5,BAIAP2,ENSCHIG00000010440,FBXL20,RAP1B,DGKB,SNAP25,BDNF,ABHD6,KCTD13,NETO1,CASK,SYT7,MAPK1,SYP,SLC4A8,KRAS,CLSTN2,PTPRS,CPLX2,PCDH17,SLC8A2,CACNG5,SLC4A10,ENSCHIG00000013367,KIF5B,ATP2A2,SRF,RAP1A,PRKCB,VHL,CELF4,GRID2,APP,NTRK2,CNR1,AKAP12,F2R,PRKCE,ITGB1,SHANK1,SLC1A3,FAM107A,ENSCHIG0000…
GO:BP	regulation of cellular response to stress	GO:0080135	4.26601e-07	6.36998	485	4434	203	15439	EPHA4,FIGNL1,POT1,NUAK1,TMEM33,NCOA7,BCLAF1,CRHBP,ITCH,YOD1,SLC7A11,PIK3R1,INPP5F,DDIAS,HGF,SFRP2,SMCHD1,SMG1,ACKR3,SFPQ,KMT5B,SVIP,USP1,BRAF,MDFIC,SLC38A2,LETM1,PJA2,USP25,DYRK1A,UBE2J1,HIF1A,GCH1,NACC2,UBR5,LYN,DYRK3,PAFAH1B1,ERN1,TP53BP1,DLG1,DDAH1,MET,UBQLN1,SNAI2,HIPK3,RNF185,EDEM1,PPP4R2,TNFRSF11A,SPIRE1,ERCC4,ERCC6,CDK6,ARID2,PTPRS,SASH1,AJUBA,CDK9,STK3,ZEB2,DDX5,EGFR,OPA1,BCL6,MAP3K13,RNF…
GO:BP	positive regulation of cell communication	GO:0010647	4.47916e-07	6.3488	1151	4434	425	15439	KITLG,ADIPOQ,CXCR4,EPHA4,IQGAP3,LURAP1,USP15,IGF1,LAMTOR3,TMEM33,BCLAF1,CACNB2,ABRA,TNFSF18,MYOCD,MPP2,CARTPT,PIK3R1,BMP5,GPR137B,TSPYL5,TRIM25,HGF,CFTR,ADRA2B,SFRP2,PRLR,PPARD,GAREM1,SEH1L,ACKR3,CHP2,SFPQ,AGO3,IKBKB,MCU,SHANK2,ITSN1,RAB3B,GLMN,F3,BRAF,MDFIC,SYT1,LMO3,RBPJ,PJA2,CYFIP2,TXNDC15,PTBP1,RECK,FYN,GRM1,HIF1A,IGFBP5,THBS1,CYP1B1,USP34,AAK1,NACC2,YTHDF1,MTDH,UBR5,LYN,CBL,YAP1,RC3H1,PTPN11…
GO:BP	transmembrane receptor protein serine/threonine kinase signaling pathway	GO:0007178	4.7336e-07	6.32481	265	4434	124	15439	NCEH1,USP15,LEF1,ASPN,SPART,MYOCD,BMP5,ONECUT2,SFRP2,ENSCHIG00000008899,RBPJ,RGMB,JADE2,CD109,THBS1,PRDM16,GLG1,TGFBR2,CHST11,RNF111,SMAD9,CAV2,BMPR1B,SMAD4,TWSG1,TGFB1I1,MAPK3,SNX25,TGFBR3,NOTCH2,PTPRK,SPTBN1,PMEPA1,TGIF2,SORL1,LTBP4,DDX5,TRIM33,LOX,SMAD5,SMPD3,TMEM100,NPNT,VEPH1,SMAD3,ING2,RBM14,CDKN1C,HES1,LEMD3,EP300,EGR1,CTDSPL2,FERMT2,FBN1,LTBP1,SPRED2,ZEB1,BAMBI,SRC,LRRC32,KIAA0319,INHBB,Z…
GO:BP	epithelium development	GO:0060429	5.02984e-07	6.29845	798	4434	309	15439	CXCL10,ARL13B,ADIPOQ,EPHA4,IQGAP3,MEOX2,PRICKLE1,LEF1,SULT1B1,GJA1,FGF7,TGM2,EHF,ADAMTS12,BMP5,RIPOR2,ONECUT2,KIF20B,HGF,SFRP2,TMEM107,DDR1,FOXF2,GREB1L,TRAF3IP1,LZTS2,IKBKB,GLMN,ATF4,CASP6,RBPJ,CTSB,CD109,HIF1A,IGFBP5,PAX7,CLIC4,PCDH8,ABI1,CYP7B1,LIN7C,YAP1,NPHS2,KDM5B,SALL1,ARHGAP35,ACTG1,VEZF1,PAFAH1B1,ERCC3,DAG1,TGFBR2,RAP1B,ENSCHIG00000011448,DLG1,MET,PKD2,ZDHHC21,RFX3,RSPO3,BDNF,HHIP,FOXP1,…
GO:BP	positive regulation of cellular protein metabolic process	GO:0032270	5.26057e-07	6.27897	1026	4434	384	15439	KITLG,ADIPOQ,DCUN1D1,EPHA4,RHBDD1,KHDRBS1,IQGAP3,PSRC1,PRICKLE1,IGF1,CLEC7A,BBS7,LAMTOR3,ARRDC3,FGF7,SOCS5,TNFSF18,PDGFC,CLIP3,CARTPT,BMP5,RNF40,TSPYL5,HGF,ADRA2B,SFRP2,LCP2,PRLR,CACUL1,GAREM1,ACKR3,SVIP,DOCK7,F3,ARNT,PRKAG2,BRAF,MDFIC,PPP1R12A,PJA2,CYFIP2,LARP1,PTBP1,VLDLR,DYRK1A,FYN,GRM1,THBS1,PAX7,ABI1,YTHDF1,ARFGEF1,ASPH,LYN,PTPN11,MMD,ERN1,UBE3A,NFKBIA,TGFBR2,RAP1B,DLG1,FN1,UHMK1,PKD2,TEC,AN…
GO:BP	regulation of programmed cell death	GO:0043067	7.1392e-07	6.14635	970	4434	365	15439	KITLG,CXCL10,ADIPOQ,RHBDD1,DHCR24,FIGNL1,ANO6,IGF1,CLEC7A,NDNF,LEF1,TNFAIP8,ATG5,BCLAF1,ITCH,TGM2,ADNP,SLC7A11,CLIP3,MYOCD,PIK3R1,GZMA,MITF,TMEM14A,RRN3,DCUN1D3,DDIAS,HGF,APC,SFRP2,PRLR,RYBP,ACKR3,SFPQ,ITSN1,F3,BRAF,DUSP6,ATF4,APBB2,GABRB2,PHIP,HIF1A,TYRO3,THBS1,MERTK,BIRC6,CYP1B1,NACC2,SAP18,NAA16,MTDH,RRM2B,ENSCHIG00000021932,LYN,CBL,YAP1,DYRK3,TMC8,ERCC3,PPT1,MET,CHST11,UBQLN1,BCL2L2,NET1,SNAI…
GO:BP	negative regulation of signal transduction	GO:0009968	7.70513e-07	6.11322	858	4434	328	15439	ADIPOQ,ECM1,FIGNL1,PRICKLE1,CNOT2,IGF1,G3BP1,ARRDC3,ASPN,CRHBP,UBR1,SOCS5,SPART,ITCH,HEY1,MYOCD,ADAMTS12,BMP5,TMEM14A,RIPOR2,ONECUT2,RRN3,INPP5F,DDIAS,HGF,PAQR3,APC,TMEM64,SFRP2,CD2AP,RNF152,RNF125,TRAF3IP1,RABGEF1,ACKR3,LZTS2,DUSP4,DUSP6,ENSCHIG00000008899,LMO3,WNT5B,DYRK1A,CD109,PHIP,ENSCHIG00000018293,HIF1A,IGFBP5,TYRO3,THBS1,BIRC6,RRM2B,ENSCHIG00000021932,CYP7B1,YTHDF3,LYN,CBL,YAP1,DYRK3,PRDM…
GO:BP	regulation of cell death	GO:0010941	7.7919e-07	6.10836	1038	4434	387	15439	KITLG,CXCL10,ADIPOQ,RHBDD1,DHCR24,FIGNL1,ANO6,IGF1,CLEC7A,NDNF,LEF1,TNFAIP8,NCOA7,ATG5,BCLAF1,ITCH,TGM2,ADNP,SLC7A11,CLIP3,MYOCD,PIK3R1,GZMA,MITF,PDE12,TMEM14A,RRN3,DCUN1D3,DDIAS,HGF,APC,SFRP2,PRLR,RYBP,VPS4B,ACKR3,SFPQ,ITSN1,F3,SLC25A24,BRAF,DUSP6,ATF4,APBB2,GABRB2,PHIP,FYN,HIF1A,TYRO3,THBS1,MERTK,BIRC6,CYP1B1,NACC2,ENSCHIG00000023777,SAP18,NAA16,MTDH,RRM2B,ENSCHIG00000021932,LYN,RRAS2,CBL,YAP1,…
GO:BP	positive regulation of protein modification process	GO:0031401	8.17792e-07	6.08736	792	4434	306	15439	KITLG,ADIPOQ,DCUN1D1,EPHA4,IQGAP3,PSRC1,PRICKLE1,IGF1,LAMTOR3,ARRDC3,FGF7,TNFSF18,PDGFC,CLIP3,CARTPT,BMP5,RNF40,TSPYL5,HGF,ADRA2B,SFRP2,LCP2,PRLR,CACUL1,GAREM1,ACKR3,SVIP,DOCK7,ARNT,PRKAG2,BRAF,MDFIC,PPP1R12A,PJA2,PTBP1,VLDLR,DYRK1A,FYN,GRM1,THBS1,PAX7,ABI1,ARFGEF1,LYN,PTPN11,MMD,ERN1,UBE3A,TGFBR2,RAP1B,DLG1,PKD2,TEC,UBQLN1,RNF111,NDFIP2,BDNF,STRADA,NSD3,CSF1,CAV2,JARID2,NEDD9,TNFRSF11A,SMAD4,TWS…
GO:BP	export from cell	GO:0140352	8.48284e-07	6.07146	593	4434	239	15439	RAPGEF4,SYT11,VPS45,IGF1,SLC9B2,SLC4A4,GJA1,SLC22A2,CRHBP,FGF7,BLOC1S6,CACNB2,ATP1B1,CARTPT,RAB27B,CFTR,LCP2,EXOC2,CD2AP,VPS4B,RABGEF1,RAB11FIP2,CCDC186,MCU,RAB3B,GLMN,BRAF,RAB21,SYT1,PRSS12,HIF1A,SYT16,TYRO3,MERTK,NAPB,LYN,RIMS1,LIN7C,KDM5B,PTPN11,EXOC3L2,PAFAH1B1,ENSCHIG00000010440,FBXL20,RAP1B,DLG1,FN1,PPT1,GHRHR,RFX3,PCSK5,SNAP25,BDNF,KCNT2,ARFIP1,AXL,GPAM,AP1G1,TRIM72,ILDR2,CASK,TNFRSF11A,SM…
GO:BP	catabolic process	GO:0009056	1.01845e-06	5.99206	1558	4434	553	15439	RIDA,ADIPOQ,TTC3,EPHA4,RHBDD1,STX12,SYT11,PGLYRP3,ELAPOR1,TUT4,NAPEPLD,PRICKLE1,USP15,IGF1,GABARAPL1,BBS7,SULT1B1,SLC4A4,GM2A,STX17,AFG1L,ATG5,NT5E,UBR1,SORD,SOCS5,PIP4K2A,ITCH,TMEM41B,TRIM21,GLYATL2,YOD1,RETREG3,ENC1,GZMA,ADAMTS12,MTRR,PDE12,ENSCHIG00000015705,ENSCHIG00000006638,HOGA1,VTI1A,INPP5F,GPR137B,TRIM25,CAMLG,APC,UBR3,ANGEL2,PIPOX,CACUL1,RYBP,PPARD,RBM24,FOXF2,VPS4B,RNF152,RNF125,FBXL19…
GO:BP	regulation of neuron differentiation	GO:0045664	1.1609e-06	5.9352	387	4434	167	15439	EPHA4,NDNF,SPART,RAP1GAP2,RETREG3,BMP5,INPP5F,PAQR3,ADRA2B,SFRP2,BRAF,RAB21,SYT1,PLAA,VLDLR,FYN,NIN,YTHDF1,LYN,RIMS1,DDX6,MARK1,ARHGAP35,MMD,CRK,PAFAH1B1,FN1,MEIS1,SNAP25,STMN2,BDNF,BEND6,THRB,MYLIP,NEDD4L,EIF4E,PTPRS,LPAR1,ENSCHIG00000015151,UST,CAMK1D,SS18L1,TGIF2,CAPRIN1,ZEB2,SOX9,SPAG9,PTPN9,EPHA3,NEPRO,BCL6,MAP3K13,ECT2,NEUROD1,MAP2,SEMA3A,PPFIA2,SOCS2,ASCL1,WDR36,PAX6,SRF,SYT4,RAP1A,CCDC88A…
GO:BP	metabolic process	GO:0008152	1.216e-06	5.91507	9624	4434	2929	15439	KITLG,RIDA,CCT8,ATP6V1A,RABL3,XXYLT1,MASP1,ADIPOQ,DCUN1D1,NCEH1,TTC3,PPIG,EPC2,ORC4,DPP10,ENSCHIG00000020570,ORC2,ENSCHIG00000017628,IKZF2,EPHA4,RHBDD1,KHDRBS1,STX12,DHDDS,IQGAP3,SYT11,PGLYRP3,ECM1,HAO2,PSRC1,ELAPOR1,DR1,ENSCHIG00000013246,NFIA,DHCR24,TUT4,LURAP1,FIGNL1,MEOX2,TWISTNB,NAPEPLD,HBP1,FKBP14,YAE1,POT1,PRICKLE1,CNOT2,USP15,IGF1,NUAK1,YARS2,KLRK1,GABARAPL1,CLEC7A,BBS7,NDNF,LEF1,TBCK,LAM…
GO:BP	regulation of plasma membrane bounded cell projection organization	GO:0120035	1.36579e-06	5.86461	399	4434	171	15439	EPHA4,NDNF,ATG5,SPART,RAP1GAP2,RETREG3,BMP5,RIPOR2,INPP5F,PAQR3,APC,SFRP2,FNBP1L,BRAF,RAB21,SYT1,PLAA,VLDLR,FYN,NIN,RHOQ,YTHDF1,LYN,RIMS1,MARK1,ARHGAP35,CRK,PAFAH1B1,NCKAP1,FN1,MNS1,SNAP25,STMN2,BDNF,PLD1,MYLIP,NEDD4L,CDKL5,PTPRS,LPAR1,ENSCHIG00000015151,UST,CAMK1D,NRP1,SS18L1,CAPRIN1,CORO1C,ZEB2,PLEKHM1,PTPN9,EPHA3,MAP3K13,MAP2,SEMA3A,PPFIA2,WDR36,CNTROB,SRF,SYT4,RAP1A,CEP135,FER,CCDC88A,RREB1,L…
GO:BP	protein metabolic process	GO:0019538	1.51328e-06	5.82008	4625	4434	1485	15439	KITLG,RIDA,RABL3,XXYLT1,MASP1,ADIPOQ,DCUN1D1,NCEH1,TTC3,PPIG,DPP10,EPHA4,RHBDD1,KHDRBS1,DHDDS,IQGAP3,ECM1,PSRC1,DR1,ENSCHIG00000013246,DHCR24,FKBP14,YAE1,PRICKLE1,USP15,IGF1,NUAK1,YARS2,CLEC7A,BBS7,NDNF,LEF1,TBCK,LAMTOR3,PPM1K,MAPK10,TNFAIP8,ARRDC3,GALNTL6,CDC14C,IARS1,ENSCHIG00000010087,NCOA7,CDK19,AFG1L,ENSCHIG00000017313,ATG5,PPIL4,MTRF1L,DPP8,HACD3,UBR1,FGF7,PPP2R5E,PAIP2B,SOCS5,ENSCHIG000000…
GO:BP	response to organonitrogen compound	GO:0010243	1.52558e-06	5.81657	494	4434	204	15439	ADIPOQ,EPHA4,RHBDD1,IGF1,ABCC9,LAMTOR3,CRHBP,HOMER1,UBR1,SOCS5,SLC1A2,YOD1,PDGFC,PIK3R1,TRIM25,CFTR,APC,HCN1,GLP1R,CPEB3,SVIP,CACNA2D1,C2CD5,CASP6,TMEM129,LARP1,USP25,PHIP,FYN,UBE2J1,KAT2B,IGFBP5,RHOQ,TBC1D4,EDEM3,SSH1,PTPN11,TRPC3,ENSCHIG00000010440,NFKBIA,RAP1B,GHRHR,PKD2,UBQLN1,DNMT3A,RNF185,CAV2,ZFP36L1,CPEB1,TRIM72,EDEM1,UBR2,MAPK3,AQP8,RRAGC,MAPK1,TGFBR3,CTNNA1,ENPP1,SNX5,SORL1,GPLD1,NR4A2,…
GO:BP	organic cyclic compound biosynthetic process	GO:1901362	1.5475e-06	5.81037	3064	4434	1017	15439	CCT8,ATP6V1A,ADIPOQ,EPC2,IKZF2,KHDRBS1,ECM1,PSRC1,DR1,NFIA,DHCR24,TUT4,MEOX2,TWISTNB,HBP1,POT1,PRICKLE1,CNOT2,IGF1,BBS7,LEF1,KLF3,NR3C1,ZBTB5,EBF2,NCOA7,ENSCHIG00000020077,TBPL1,BCLAF1,NT5E,TTC5,ICE2,FGF7,ENSCHIG00000018361,ENSCHIG00000027081,EPC1,ITCH,NCOA2,HEY1,ABRA,RRP8,TRIM21,EHF,AHCTF1,SLC7A11,GTF2H3,SBNO1,RFC5,ZFP1,ATXN1L,ZFP30,ENSCHIG00000017808,MYOCD,MBTD1,PIK3R1,ZNF445,MITF,BMP5,ENSCHIG0…
GO:BP	positive regulation of cell population proliferation	GO:0008284	1.70361e-06	5.76863	585	4434	235	15439	KITLG,CLDN1,IQGAP3,ECM1,IGF1,CLEC7A,LEF1,GJA1,FGF7,PDGFC,ATXN1L,MYOCD,BMP5,KIF20B,WAPL,TSPYL5,SFRP2,CACUL1,PPARD,GAREM1,CHP2,F3,HIPK1,SP1,TIAM1,RBPJ,PURA,NR4A3,HIF1A,IGFBP5,THBS1,MEIS2,PAX7,BIRC6,CYP7B1,LYN,YAP1,KDM5B,ERN1,LIFR,TGFBR2,DLG1,ATF2,FN1,NRAS,GHRHR,MAB21L1,WDR48,FOXP1,GPAM,HHLA2,CSF1,CAV2,LAMC2,RTKN2,SMAD4,PDGFA,MAPK3,TCF7L2,HMX2,ASH2L,MAPK1,NOTCH2,HOXA3,SRPK2,CDK6,EIF5A2,KRAS,ENSCHIG0…
GO:BP	vasculature development	GO:0001944	1.75669e-06	5.7553	515	4434	211	15439	CXCL10,ECM1,MEOX2,PRICKLE1,NDNF,LEF1,HEY1,MYOCD,SFRP2,ACKR3,ETS1,GLMN,F3,SP1,RBPJ,RECK,QKI,HIF1A,THBS1,CYP1B1,CLIC4,MTDH,AGO2,YAP1,NFATC3,ACTG1,VEZF1,EPN2,TGFBR2,ATF2,PKD2,PCSK5,RSPO3,RHOJ,MEIS1,MINAR1,RASA1,ZFP36L1,C6,TCF7L2,ADAM12,MAPK1,NOTCH2,HOXA3,ENSCHIG00000026624,NRCAM,E2F7,ARID2,ENSCHIG00000021309,SASH1,THBS2,SOS1,NRP1,IHH,PARVA,PIK3C2A,GPLD1,SPHK2,ENSCHIG00000022600,GADD45A,ENSCHIG000000…
GO:BP	regulation of cell projection organization	GO:0031344	1.78281e-06	5.7489	403	4434	172	15439	EPHA4,NDNF,ATG5,SPART,RAP1GAP2,RETREG3,BMP5,RIPOR2,INPP5F,PAQR3,APC,SFRP2,FNBP1L,BRAF,RAB21,SYT1,PLAA,VLDLR,FYN,NIN,RHOQ,YTHDF1,LYN,RIMS1,MARK1,ARHGAP35,CRK,PAFAH1B1,NCKAP1,FN1,MNS1,SNAP25,STMN2,BDNF,PLD1,MYLIP,NEDD4L,CDKL5,PTPRS,LPAR1,ENSCHIG00000015151,UST,CAMK1D,NRP1,SS18L1,CAPRIN1,CORO1C,ZEB2,PLEKHM1,PTPN9,EPHA3,MAP3K13,ERMN,MAP2,SEMA3A,PPFIA2,WDR36,CNTROB,SRF,SYT4,RAP1A,CEP135,FER,CCDC88A,RR…
GO:BP	regulation of anatomical structure morphogenesis	GO:0022603	1.79204e-06	5.74665	680	4434	267	15439	CXCL10,ADIPOQ,EPHA4,ECM1,CD53,MEOX2,ASPN,GJA1,FGF7,SPART,ADAMTS12,RIPOR2,HGF,SFRP2,MYL12B,EPB41L3,MCU,ETS1,F3,BRAF,SP1,RAB21,SYT1,EPS8,RBPJ,PLAA,RECK,PHIP,FYN,HIF1A,NIN,THBS1,CYP1B1,RHOQ,YTHDF1,MTDH,AGO2,RIMS1,RC3H1,ARHGAP35,FMNL2,BAIAP2,CRK,PAFAH1B1,EPN2,PAX9,DAG1,TGFBR2,DLG1,ATF2,FN1,CDC42SE1,RHOJ,BDNF,MINAR1,FOXP1,THRB,CSF1,MIEF1,C6,NEDD9,SPIRE1,NEDD4L,SMAD4,ADAM12,FRS2,AP1AR,WDR1,PTPRS,LPAR1,…
GO:BP	positive regulation of molecular function	GO:0044093	1.84288e-06	5.7345	1106	4434	407	15439	KITLG,ADIPOQ,EPHA4,IQGAP3,PSRC1,POT1,IGF1,CLEC7A,LAMTOR3,RAP1GDS1,ARAP2,ARHGAP24,GM2A,ARRDC3,EBF2,ABRA,TRIM21,ATP1B1,PDGFC,RFC5,RAP1GAP2,MYOCD,CARTPT,RIPOR2,WAPL,TRIM25,HGF,CFTR,RFK,ADRA2B,RASAL2,SFRP2,LCP2,SNX18,PRLR,CACUL1,CHP2,IDE,RAB11FIP2,IKBKB,RIN1,ITSN1,DOCK7,ARHGAP29,F3,PRKAG2,MDFIC,PPP1R12A,TIAM1,CYFIP2,TBC1D9B,PLAA,VLDLR,GRM1,GCH1,APH1B,THBS1,ASAP2,TBC1D4,ABI1,MTDH,ASPH,LYN,DNAJB2,DENND…
GO:BP	modification-dependent macromolecule catabolic process	GO:0043632	1.8512e-06	5.73255	389	4434	167	15439	TTC3,TUT4,PRICKLE1,USP15,BBS7,UBR1,SOCS5,ITCH,YOD1,TRIM25,CAMLG,UBR3,CACUL1,RYBP,FOXF2,VPS4B,RNF125,FBXL19,RNF216,ATE1,VPS37A,SVIP,USP1,GLMN,TMEM129,PLAA,USP25,UBE2J1,STYX,USP34,PCYOX1,WAC,CBL,EDEM3,UBE3A,ENSCHIG00000016989,UBA6,UBQLN1,RNF111,PSMF1,UBE4A,DTL,RNF185,KCTD13,FBXO33,TRIM72,EDEM1,UBR2,MYLIP,NEDD4L,TGFB1I1,HACE1,ARIH1,PSMA7,FBXO22,RCHY1,UBAP1,UFL1,PELI1,TRIB2,UBE4B,KLHL20,KLHL42,RBBP6,…
GO:BP	cellular response to organonitrogen compound	GO:0071417	2.11849e-06	5.67397	339	4434	149	15439	ADIPOQ,EPHA4,IGF1,LAMTOR3,CRHBP,UBR1,PDGFC,PIK3R1,CFTR,APC,HCN1,GLP1R,CPEB3,CACNA2D1,C2CD5,CASP6,LARP1,PHIP,FYN,KAT2B,IGFBP5,RHOQ,TBC1D4,SSH1,PTPN11,ENSCHIG00000010440,RAP1B,GHRHR,PKD2,DNMT3A,CAV2,ZFP36L1,CPEB1,TRIM72,UBR2,MAPK3,AQP8,RRAGC,MAPK1,CTNNA1,ENPP1,SNX5,SORL1,GPLD1,NR4A2,SOX9,PID1,HTR2B,RPE65,SOCS2,PDGFRA,OTOP1,SLC39A14,HTR1B,SMPD3,RAP1A,HTR5A,FER,RAB31,ADCY5,GNAI3,OSBPL8,P2RY1,USO1,APP…
GO:BP	regulation of cellular component movement	GO:0051270	2.14189e-06	5.6692	690	4434	270	15439	KITLG,CXCL10,CLDN1,ADIPOQ,ECM1,MEOX2,ANO6,IGF1,KLRK1,CLEC7A,LEF1,GJA1,FGF7,TNFSF18,MYOCD,PIK3R1,MITF,RIPOR2,ONECUT2,PRKG1,KIF20B,INPP5F,HGF,GNRH1,APC,SFRP2,TTLL6,DSG2,RABGEF1,MCU,ETS1,DOCK7,BRAF,SP1,TIAM1,WNT5B,CACNA1C,ATP8A1,PLAA,RECK,NR4A3,HIF1A,SEMA6D,IGFBP5,THBS1,CYP1B1,CLIC4,DACH1,YTHDF1,LYN,AGO2,RRAS2,AMOTL1,ACTG1,CRK,ENSCHIG00000019133,CCDC125,FRMD5,DAG1,TGFBR2,DLG1,FN1,MET,RHOJ,SNAI2,RANG…
GO:BP	cellular macromolecule catabolic process	GO:0044265	2.17387e-06	5.66277	714	4434	278	15439	RIDA,TTC3,EPHA4,RHBDD1,TUT4,PRICKLE1,USP15,BBS7,AFG1L,UBR1,SOCS5,ITCH,YOD1,ENC1,GZMA,ADAMTS12,PDE12,TRIM25,CAMLG,UBR3,ANGEL2,CACUL1,RYBP,RBM24,FOXF2,VPS4B,RNF125,FBXL19,SMG1,RNF216,ATE1,IDE,CPEB3,AGO3,VPS37A,SVIP,USP1,GLMN,TENT5C,TMEM129,LARP1,ETF1,CTSB,PLAA,VPS13A,USP25,UBE2J1,SYNCRIP,STYX,USP34,PCYOX1,PAN3,NUDT15,WAC,AGO2,CBL,RC3H1,EDEM3,MEIOC,UBE3A,ENSCHIG00000016989,PPT1,UBA6,UBQLN1,RNF111,PS…
GO:BP	regulation of cellular catabolic process	GO:0031329	2.19301e-06	5.65896	490	4434	202	15439	RIDA,EPHA4,ELAPOR1,PRICKLE1,IGF1,BBS7,SLC4A4,ATG5,SOCS5,PIP4K2A,ITCH,TRIM21,YOD1,PDE12,GPR137B,CAMLG,ANGEL2,RYBP,RBM24,FOXF2,RNF152,CPEB3,SVIP,GLMN,TENT5C,LARP1,C9ORF72,XPA,USP25,ENSCHIG00000018293,UBE2J1,SYNCRIP,HIF1A,STYX,FEZ2,NUDT15,WAC,MTDH,AGO2,RC3H1,ULK2,MEIOC,UBE3A,SEC22B,DRAM1,UBQLN1,PSMF1,RNF185,ZFP36L1,VPS13D,PIKFYVE,ATP6V0A1,EDEM1,MYLIP,MAPK3,ERCC4,ATP13A2,ZC3HAV1,TIMP3,KHSRP,PUM2,PIK3…
GO:BP	ubiquitin-dependent protein catabolic process	GO:0006511	2.4049e-06	5.6189	376	4434	162	15439	TTC3,PRICKLE1,USP15,BBS7,UBR1,SOCS5,ITCH,YOD1,TRIM25,CAMLG,UBR3,CACUL1,RYBP,FOXF2,VPS4B,RNF125,FBXL19,RNF216,ATE1,VPS37A,SVIP,USP1,GLMN,TMEM129,PLAA,USP25,UBE2J1,STYX,USP34,WAC,CBL,EDEM3,UBE3A,ENSCHIG00000016989,UBA6,UBQLN1,RNF111,PSMF1,UBE4A,DTL,RNF185,KCTD13,FBXO33,TRIM72,EDEM1,UBR2,MYLIP,NEDD4L,TGFB1I1,HACE1,ARIH1,PSMA7,FBXO22,RCHY1,UBAP1,UFL1,PELI1,TRIB2,UBE4B,KLHL20,KLHL42,RBBP6,USP49,RNF144…
GO:BP	cellular response to hormone stimulus	GO:0032870	2.67222e-06	5.57313	326	4434	144	15439	ADIPOQ,CNOT2,LEF1,NR3C1,CRHBP,PIK3R1,KLF9,APC,PRLR,GLP1R,C2CD5,LMO3,CTSB,PHIP,KAT2B,RHOQ,TBC1D4,UBR5,CYP7B1,YAP1,PTPN11,ENSCHIG00000010440,CREBRF,UBE3A,GHRHR,FOXP1,THRB,CAV2,ZFP36L1,CPEB1,TRIM72,EIF4E,UBA5,AKAP8,ENPP1,PAX8,SNX5,SORL1,HNRNPU,GPLD1,NR4A2,DDX5,AKAP13,PID1,TP63,RPE65,SOCS2,RBFOX2,OTOP1,ANXA1,SLC39A14,UFL1,DNAAF4,HNF4G,CASP9,ACSL1,FER,NCOA1,LANCL2,RAB31,PRKAA2,TRIM24,OSBPL8,EP300,EPHA…
GO:BP	blood vessel development	GO:0001568	3.21308e-06	5.49308	489	4434	201	15439	CXCL10,ECM1,MEOX2,PRICKLE1,NDNF,LEF1,HEY1,MYOCD,SFRP2,ACKR3,ETS1,GLMN,F3,SP1,RBPJ,RECK,QKI,HIF1A,THBS1,CYP1B1,CLIC4,MTDH,AGO2,YAP1,ACTG1,VEZF1,EPN2,TGFBR2,ATF2,PKD2,PCSK5,RSPO3,RHOJ,MEIS1,MINAR1,RASA1,ZFP36L1,C6,TCF7L2,ADAM12,MAPK1,NOTCH2,HOXA3,ENSCHIG00000026624,NRCAM,E2F7,ARID2,ENSCHIG00000021309,SASH1,THBS2,SOS1,NRP1,IHH,PARVA,PIK3C2A,GPLD1,SPHK2,ENSCHIG00000022600,GADD45A,ENSCHIG00000023971,A…
GO:BP	modification-dependent protein catabolic process	GO:0019941	3.28531e-06	5.48342	383	4434	164	15439	TTC3,PRICKLE1,USP15,BBS7,UBR1,SOCS5,ITCH,YOD1,TRIM25,CAMLG,UBR3,CACUL1,RYBP,FOXF2,VPS4B,RNF125,FBXL19,RNF216,ATE1,VPS37A,SVIP,USP1,GLMN,TMEM129,PLAA,USP25,UBE2J1,STYX,USP34,PCYOX1,WAC,CBL,EDEM3,UBE3A,ENSCHIG00000016989,UBA6,UBQLN1,RNF111,PSMF1,UBE4A,DTL,RNF185,KCTD13,FBXO33,TRIM72,EDEM1,UBR2,MYLIP,NEDD4L,TGFB1I1,HACE1,ARIH1,PSMA7,FBXO22,RCHY1,UBAP1,UFL1,PELI1,TRIB2,UBE4B,KLHL20,KLHL42,RBBP6,USP49…
GO:BP	homeostatic process	GO:0042592	3.71305e-06	5.43027	1239	4434	448	15439	KITLG,CXCL10,CCT8,ATP6V1A,CLDN1,ADIPOQ,CLDN18,MAIP1,NAPEPLD,POT1,ANO6,SLC9B2,RAP1GDS1,SLC4A4,GRIA1,ARRDC3,EBF2,ATG5,HOMER1,TXNDC16,HACD3,CACNB2,TGM2,ATP1B1,SLC10A7,SLC7A11,PDGFC,ENSCHIG00000021323,CARTPT,PIK3R1,SLMAP,RRN3,CFTR,SLC30A9,TMEM64,UBAP2L,ATP2B2,GLP1R,SMG1,IDE,RAB11FIP2,CCDC186,POLB,ANK3,MCU,ETS1,BBS10,GRIN2B,CACNA1C,ATF4,RBPJ,LETM1,TXNDC15,ARF1,FYN,ENSCHIG00000018293,GRM1,HIF1A,CERT1,I…
GO:BP	protein catabolic process	GO:0030163	3.76395e-06	5.42436	613	4434	243	15439	TTC3,EPHA4,RHBDD1,PRICKLE1,USP15,BBS7,AFG1L,UBR1,SOCS5,ITCH,YOD1,ENC1,GZMA,ADAMTS12,TRIM25,CAMLG,APC,UBR3,CACUL1,RYBP,FOXF2,VPS4B,RNF125,FBXL19,RNF216,ATE1,IDE,VPS37A,SVIP,USP1,GLMN,TMEM129,CTSB,PLAA,VPS13A,USP25,FYN,SNX3,UBE2J1,STYX,USP34,PCYOX1,NUDT15,WAC,CBL,PLEKHG5,EDEM3,UBE3A,AZIN1,SEC22B,ENSCHIG00000016989,PPT1,UBA6,UBQLN1,RNF111,PSMF1,UBE4A,DTL,RNF185,KCTD13,FBXO33,TRIM72,EDEM1,UBR2,MYLIP,…
GO:BP	response to hormone	GO:0009725	4.28353e-06	5.3682	387	4434	165	15439	ADIPOQ,CNOT2,LEF1,NR3C1,CRHBP,NCOA2,PIK3R1,TRIM25,KLF9,GNRH1,APC,PRLR,GLP1R,C2CD5,LMO3,CTSB,PHIP,KAT2B,IGFBP5,RHOQ,TBC1D4,UBR5,CYP7B1,LYN,YAP1,PTPN11,ENSCHIG00000010440,CREBRF,UBE3A,GHRHR,FOXP1,GCLC,THRB,CAV2,ZFP36L1,CPEB1,TRIM72,ASH2L,TGFBR3,RERG,EIF4E,UBA5,AKAP8,ENPP1,PAX8,SNX5,SORL1,HNRNPU,GPLD1,NR4A2,DDX5,AKAP13,PID1,TP63,CREB1,RPE65,SOCS2,RBFOX2,OTOP1,ANXA1,SLC39A14,UFL1,DNAAF4,HNF4G,CASP9,S…
GO:BP	regulation of apoptotic process	GO:0042981	4.3093e-06	5.36559	949	4434	354	15439	KITLG,CXCL10,ADIPOQ,RHBDD1,DHCR24,FIGNL1,ANO6,IGF1,CLEC7A,NDNF,LEF1,TNFAIP8,ATG5,BCLAF1,ITCH,TGM2,ADNP,SLC7A11,CLIP3,MYOCD,PIK3R1,GZMA,MITF,TMEM14A,RRN3,DCUN1D3,DDIAS,HGF,APC,SFRP2,PRLR,RYBP,ACKR3,SFPQ,ITSN1,F3,BRAF,DUSP6,ATF4,APBB2,GABRB2,PHIP,HIF1A,TYRO3,THBS1,MERTK,BIRC6,CYP1B1,NACC2,SAP18,NAA16,MTDH,RRM2B,ENSCHIG00000021932,LYN,CBL,YAP1,DYRK3,TMC8,ERCC3,PPT1,CHST11,UBQLN1,BCL2L2,NET1,SNAI2,BD…
GO:BP	regulation of transforming growth factor beta receptor signaling pathway	GO:0017015	4.76782e-06	5.32168	88	4434	52	15439	ASPN,MYOCD,ONECUT2,ENSCHIG00000008899,CD109,THBS1,PRDM16,GLG1,CHST11,RNF111,CAV2,SMAD4,TGFB1I1,SNX25,PMEPA1,TRIM33,LOX,NPNT,VEPH1,SMAD3,ING2,CDKN1C,LEMD3,EP300,FBN1,LTBP1,SPRED2,ZEB1,BAMBI,CIDEA,ZBTB7A,ITGA3,ZNF451,ADAM17,TP53,DAB2,IL17RD,PDPK1,ZNF703,PBLD,FBN2,FERMT1,SKI,SMURF2,CDKN2B,SPRED1,CAV1,SMAD7,SMURF1,HIPK2,HTRA3,GIPC1
GO:BP	cell growth	GO:0016049	5.09438e-06	5.29291	276	4434	125	15439	PSRC1,IGF1,LEF1,SPART,MYOCD,DCUN1D3,SFRP2,DDR1,EPB41L3,SYT1,APBB2,CYFIP2,JADE2,C9ORF72,PLAA,IGFBP5,NIN,RIMS1,DNAJB2,TMC8,ENSCHIG00000019133,TGFBR2,FN1,PPT1,BDNF,MINAR1,IP6K2,PTPRJ,NEDD4L,SMAD4,MEX3C,RERG,PTPRS,NCBP1,ENPP1,CDA,ZEB2,SPHK2,SOX9,EGFR,N6AMT1,DCBLD2,BCL6,MAP3K13,MAP2,ST7L,SEMA3A,SOCS2,WDR36,FLRT3,SRF,SYT4,SMAD3,LIMK1,CAPRIN2,EFNA5,FSTL4,APP,ADAM10,RB1,ITGB1,RAPH1,KIAA0319,NDEL1,CTNNB1,…
GO:BP	secretion by cell	GO:0032940	5.53902e-06	5.25657	562	4434	225	15439	RAPGEF4,SYT11,VPS45,IGF1,SLC9B2,GJA1,CRHBP,FGF7,BLOC1S6,CACNB2,CARTPT,RAB27B,CFTR,LCP2,EXOC2,CD2AP,VPS4B,RABGEF1,RAB11FIP2,CCDC186,MCU,RAB3B,GLMN,BRAF,RAB21,SYT1,PRSS12,HIF1A,SYT16,TYRO3,MERTK,NAPB,LYN,RIMS1,LIN7C,KDM5B,PTPN11,EXOC3L2,PAFAH1B1,ENSCHIG00000010440,FBXL20,RAP1B,FN1,PPT1,GHRHR,RFX3,PCSK5,SNAP25,BDNF,ARFIP1,AXL,GPAM,AP1G1,TRIM72,ILDR2,CASK,TNFRSF11A,SMAD4,TCF7L2,SNX19,SYT7,FRMD8,ATP13…
GO:BP	positive regulation of cell differentiation	GO:0045597	5.5731e-06	5.2539	642	4434	252	15439	KITLG,ADIPOQ,CD53,NAPEPLD,IGF1,CLEC7A,NDNF,LEF1,SLC9B2,GJA1,SOCS5,MYOCD,RETREG3,BMP5,RIPOR2,KIF20B,ADRA2B,TMEM64,SFRP2,RBM24,ETS1,BRAF,RAB21,SYT1,LMO3,WNT5B,RBPJ,CDS1,JADE2,PLAA,VLDLR,FYN,HIF1A,NIN,KLF10,LYN,RIMS1,PRDM16,ARHGAP35,MMD,VEZF1,CRK,PAFAH1B1,TGFBR2,FN1,PWP1,SOX5,RFX3,ASXL2,STMN2,BDNF,AXL,BEND6,CSF1,BMPR1B,ZFP36L1,NEDD9,NEDD4L,SMAD4,TGFB1I1,TCF7L2,NOTCH2,ENSCHIG00000015151,CAMK1D,NRP1,S…
GO:BP	mitotic cell cycle	GO:0000278	6.09219e-06	5.21523	539	4434	217	15439	IQGAP3,PSRC1,IGF1,NCAPG,GJA1,DCUN1D3,KIF20B,KIF11,WAPL,APC,ANGEL2,SNX18,CACUL1,NAA50,VPS4B,SEH1L,SBDS,LZTS2,ANK3,REEP3,PPP1R12A,EPS8,PDS5A,STAG1,ARF1,HECA,MEIS2,NCAPH,NACC2,PDS5B,NUDT15,RAD21,WEE1,NPAT,PTPN11,MAP9,PAFAH1B1,MEIOC,ERCC3,DLG1,ATF2,PKD2,TRIM36,SETDB2,DTL,AZI2,CAV2,ZFP36L1,CCSAP,STAG2,KMT2E,E2F7,BACH1,EIF4E,AKAP8,SPTBN1,HNRNPU,CHMP6,UNC119,KPNB1,KIF2A,CTDSPL,EGFR,SON,CHMP2B,ECT2,MAP3K…
GO:BP	heterocycle metabolic process	GO:0046483	7.42885e-06	5.12908	4237	4434	1363	15439	RIDA,CCT8,ATP6V1A,ADIPOQ,EPC2,ORC4,IKZF2,KHDRBS1,ECM1,PSRC1,DR1,NFIA,TUT4,FIGNL1,MEOX2,TWISTNB,HBP1,POT1,PRICKLE1,CNOT2,IGF1,YARS2,BBS7,LEF1,TRMT10A,KLF3,SULT1B1,SLC4A4,THAP9,NR3C1,SLU7,ZBTB5,EBF2,IARS1,NCOA7,ENSCHIG00000020077,ENSCHIG00000017313,TBPL1,BCLAF1,NT5E,TTC5,ICE2,FGF7,ENSCHIG00000018361,ENSCHIG00000027081,TGDS,EPC1,ITCH,NCOA2,HEY1,ABRA,ESRP1,RRP8,TRIM21,CSTF3,EHF,AHCTF1,EXO1,GTF2H3,SBN…
GO:BP	response to nitrogen compound	GO:1901698	8.91268e-06	5.04999	544	4434	218	15439	ADIPOQ,EPHA4,RHBDD1,IGF1,ABCC9,LAMTOR3,CRHBP,HOMER1,UBR1,SOCS5,SLC1A2,YOD1,PDGFC,PIK3R1,PDE12,TRIM25,CFTR,APC,LYPD1,HCN1,GLP1R,COLEC12,CPEB3,SVIP,CACNA2D1,C2CD5,CASP6,TMEM129,LARP1,USP25,PHIP,FYN,UBE2J1,KAT2B,IGFBP5,RHOQ,TBC1D4,EDEM3,SSH1,PTPN11,TRPC3,ENSCHIG00000010440,NFKBIA,RAP1B,GHRHR,PKD2,UBQLN1,DNMT3A,RNF185,CAV2,ZFP36L1,CPEB1,TRIM72,EDEM1,UBR2,MAPK3,AQP8,RRAGC,MAPK1,TGFBR3,CTNNA1,ENPP1,SNX…
GO:BP	negative regulation of cell death	GO:0060548	9.03108e-06	5.04426	624	4434	245	15439	KITLG,RHBDD1,DHCR24,FIGNL1,IGF1,NDNF,LEF1,TNFAIP8,NCOA7,ATG5,ITCH,ADNP,SLC7A11,MYOCD,PIK3R1,MITF,PDE12,TMEM14A,RRN3,DDIAS,HGF,SFRP2,PRLR,VPS4B,ACKR3,ITSN1,BRAF,APBB2,GABRB2,PHIP,HIF1A,TYRO3,THBS1,MERTK,BIRC6,NAA16,MTDH,RRM2B,ENSCHIG00000021932,CBL,YAP1,DYRK3,PPT1,MET,CHST11,BCL2L2,SNAI2,BDNF,HIPK3,API5,AXL,FOXP1,GCLC,GPAM,RARB,DCPS,CSF1,RASA1,DOCK8,RTKN2,SMAD4,KRAS,CTNNA1,CAAP1,CAMK1D,SORL1,HSPD1…
GO:BP	regulation of intracellular signal transduction	GO:1902531	9.40478e-06	5.02665	1069	4434	391	15439	KITLG,RABL3,ADIPOQ,EPHA4,IQGAP3,LURAP1,FIGNL1,USP15,IGF1,TBCK,LAMTOR3,ARRDC3,BCLAF1,UBR1,ITCH,ABRA,RAP1GAP2,CARTPT,RIPOR2,RRN3,GPR137B,DDIAS,TSPYL5,TRIM25,HGF,PAQR3,ADRA2B,SFRP2,CD2AP,PPARD,GAREM1,RNF152,SEH1L,RNF125,RABGEF1,ACKR3,CHP2,SFPQ,AGO3,IKBKB,DUSP4,ITSN1,F3,BRAF,MDFIC,DUSP6,LMO3,PJA2,RASGRF2,PTBP1,C9ORF72,DYRK1A,FYN,ARFGEF3,GRM1,HIF1A,STYX,IGFBP5,THBS1,RALGPS1,NACC2,MTDH,RRM2B,ARFGEF1,LY…
GO:BP	cell cycle process	GO:0022402	1.01732e-05	4.99254	775	4434	295	15439	IQGAP3,PSRC1,FIGNL1,IGF1,NCAPG,GJA1,CEP68,RRP8,AHCTF1,DCUN1D3,KIF20B,KIF11,WAPL,HEPACAM2,APC,SNX18,CACUL1,NAA50,VPS4B,ESCO1,CEP76,SEH1L,MARF1,MEIOB,SBDS,LZTS2,SFPQ,ANK3,REEP3,PPP1R12A,EPS8,PDS5A,APBB2,STAG1,ARF1,KAT2B,NIN,THBS1,NCAPH,BIRC6,NACC2,DACH1,PDS5B,RAD21,NPAT,DYRK3,MAP9,PAFAH1B1,MEIOC,ERN1,ERCC3,DLG1,ATF2,UHMK1,PKD2,TRIM36,DTL,HAUS1,CAV2,ZFP36L1,UBR2,SPIRE1,TCF7L2,CCSAP,STAG2,SSX2IP,NOTC…
GO:BP	regulation of protein localization	GO:0032880	1.03866e-05	4.98353	604	4434	238	15439	CCT8,ADIPOQ,CLDN18,DPP10,SYT11,IGF1,SLC9B2,GCC2,YOD1,CNST,SLC7A11,CLIP3,PIK3R1,RIPOR2,KIF20B,GPR137B,WAPL,CFTR,APC,LYPD1,ILRUN,CD2AP,CHP2,LZTS2,MCU,PPFIA1,SVIP,GLMN,MDFIC,C2CD5,RAB14,FYN,SNX3,UBE2J1,HIF1A,RHOQ,AAK1,XPO4,UBR5,LYN,ACSL3,PTPN11,MMD,ENSCHIG00000010440,ICE1,IWS1,DLG1,FN1,UHMK1,RFX3,TMEM30B,NDFIP2,SNAP25,ARFIP1,RANGRF,GPAM,CEP290,EDEM1,NEDD4L,TCF7L2,PICALM,SYT7,FRMD8,ATP13A2,SRI,MRAP2,…
GO:BP	nucleobase-containing compound metabolic process	GO:0006139	1.04065e-05	4.98269	4131	4434	1330	15439	RIDA,CCT8,ATP6V1A,ADIPOQ,EPC2,ORC4,IKZF2,KHDRBS1,ECM1,PSRC1,DR1,NFIA,TUT4,FIGNL1,MEOX2,TWISTNB,HBP1,POT1,PRICKLE1,CNOT2,IGF1,YARS2,BBS7,LEF1,TRMT10A,KLF3,SULT1B1,SLC4A4,THAP9,NR3C1,SLU7,ZBTB5,EBF2,IARS1,NCOA7,ENSCHIG00000020077,ENSCHIG00000017313,TBPL1,BCLAF1,NT5E,TTC5,ICE2,FGF7,ENSCHIG00000018361,ENSCHIG00000027081,TGDS,EPC1,ITCH,NCOA2,HEY1,ABRA,ESRP1,RRP8,TRIM21,CSTF3,EHF,AHCTF1,EXO1,GTF2H3,SBN…
GO:BP	regulation of neuron projection development	GO:0010975	1.06891e-05	4.97106	276	4434	124	15439	EPHA4,NDNF,SPART,RAP1GAP2,RETREG3,BMP5,INPP5F,PAQR3,SFRP2,BRAF,RAB21,SYT1,PLAA,VLDLR,FYN,NIN,YTHDF1,LYN,RIMS1,MARK1,ARHGAP35,CRK,PAFAH1B1,FN1,SNAP25,STMN2,BDNF,MYLIP,NEDD4L,PTPRS,LPAR1,ENSCHIG00000015151,UST,CAMK1D,SS18L1,CAPRIN1,ZEB2,PTPN9,EPHA3,MAP3K13,MAP2,SEMA3A,PPFIA2,WDR36,SRF,SYT4,RAP1A,CCDC88A,LIMK1,GFI1,CAPRIN2,EP300,GRID2,EFNA5,FSTL4,NCK1,NTRK2,TMEM30A,ENSCHIG00000017824,SETX,RAB29,KIAA…
GO:BP	cellular catabolic process	GO:0044248	1.07868e-05	4.96711	1317	4434	470	15439	RIDA,ADIPOQ,TTC3,EPHA4,RHBDD1,STX12,SYT11,ELAPOR1,TUT4,NAPEPLD,PRICKLE1,USP15,IGF1,GABARAPL1,BBS7,SLC4A4,GM2A,STX17,AFG1L,ATG5,NT5E,UBR1,SORD,SOCS5,PIP4K2A,ITCH,TMEM41B,TRIM21,GLYATL2,YOD1,RETREG3,ENC1,GZMA,ADAMTS12,MTRR,PDE12,ENSCHIG00000015705,HOGA1,VTI1A,INPP5F,GPR137B,TRIM25,CAMLG,UBR3,ANGEL2,PIPOX,CACUL1,RYBP,PPARD,RBM24,FOXF2,VPS4B,RNF152,RNF125,FBXL19,SMG1,RNF216,ATE1,IDE,CPEB3,AGO3,VPS37A…
GO:BP	cellular aromatic compound metabolic process	GO:0006725	1.2418e-05	4.90595	4268	4434	1370	15439	RIDA,CCT8,ATP6V1A,ADIPOQ,EPC2,ORC4,IKZF2,KHDRBS1,ECM1,PSRC1,DR1,NFIA,TUT4,FIGNL1,MEOX2,TWISTNB,HBP1,POT1,PRICKLE1,CNOT2,IGF1,YARS2,BBS7,LEF1,TRMT10A,KLF3,SULT1B1,SLC4A4,THAP9,NR3C1,SLU7,ZBTB5,EBF2,IARS1,NCOA7,ENSCHIG00000020077,ENSCHIG00000017313,TBPL1,BCLAF1,NT5E,TTC5,ICE2,FGF7,ENSCHIG00000018361,ENSCHIG00000027081,TGDS,EPC1,ITCH,NCOA2,HEY1,ABRA,ESRP1,RRP8,TRIM21,CSTF3,EHF,AHCTF1,EXO1,SLC7A11,GT…
GO:BP	negative regulation of cell differentiation	GO:0045596	1.36865e-05	4.86371	476	4434	194	15439	CXCL10,ADIPOQ,CLDN18,EPHA4,PGLYRP3,PRICKLE1,IGF1,SOCS5,SPART,RAP1GAP2,MYOCD,PIK3R1,ADAMTS12,INPP5F,PAQR3,GNRH1,TMEM64,SFRP2,PPARD,HOOK3,RBPJ,PTBP1,IGFBP5,MEIS2,LYN,DDX6,YAP1,RC3H1,PTPN11,TMEM131L,NFATC3,NFKBIA,MEIS1,TCF23,SNAI2,STMN2,BDNF,FOXP1,RARB,THRB,ZFP36L1,TRIM72,MYLIP,SMAD4,ZADH2,TWSG1,TGFB1I1,MAPK1,PIAS3,CDK6,FRS2,KRAS,AP1AR,EIF4E,CTNNA1,PTPRS,LPAR1,ENSCHIG00000015151,ENPP1,TMEM178A,IHH,S…
GO:BP	positive regulation of cellular catabolic process	GO:0031331	1.3796e-05	4.86025	255	4434	116	15439	RIDA,ELAPOR1,PRICKLE1,IGF1,BBS7,SLC4A4,ATG5,SOCS5,PIP4K2A,ITCH,TRIM21,RBM24,RNF152,CPEB3,SVIP,LARP1,C9ORF72,ENSCHIG00000018293,HIF1A,WAC,MTDH,AGO2,RC3H1,ULK2,UBQLN1,RNF185,ZFP36L1,VPS13D,EDEM1,MAPK3,ZC3HAV1,KHSRP,PIK3C2A,SH3D19,GPLD1,TRIM65,OSBPL7,FBXO22,KCNE2,TOMM7,TMTC3,KDR,RCHY1,CNOT6L,LDLR,STING1,CNOT8,UFL1,TRIB2,TP53INP1,RAB3GAP2,SCOC,CALCOCO2,ABCD2,PRKAA2,SH3GLB1,GNAI3,TNRC6B,APP,MAPK9,FOXO…
GO:BP	regulation of cellular response to transforming growth factor beta stimulus	GO:1903844	1.41517e-05	4.84919	90	4434	52	15439	ASPN,MYOCD,ONECUT2,ENSCHIG00000008899,CD109,THBS1,PRDM16,GLG1,CHST11,RNF111,CAV2,SMAD4,TGFB1I1,SNX25,PMEPA1,TRIM33,LOX,NPNT,VEPH1,SMAD3,ING2,CDKN1C,LEMD3,EP300,FBN1,LTBP1,SPRED2,ZEB1,BAMBI,CIDEA,ZBTB7A,ITGA3,ZNF451,ADAM17,TP53,DAB2,IL17RD,PDPK1,ZNF703,PBLD,FBN2,FERMT1,SKI,SMURF2,CDKN2B,SPRED1,CAV1,SMAD7,SMURF1,HIPK2,HTRA3,GIPC1
GO:BP	anterograde trans-synaptic signaling	GO:0098916	1.44776e-05	4.8393	347	4434	149	15439	ADIPOQ,EPHA4,LRRC4,GABRG1,GRIA1,CRHBP,HOMER1,CACNB2,SLC7A11,CHRNB1,MPP2,CARTPT,LYPD1,SHANK2,RIN1,RAB3B,BRAF,SYT1,ATF4,FYN,ARID1B,GJD2,NAPB,YTHDF1,LIN7C,PLEKHG5,GLRB,BAIAP2,PAFAH1B1,ENSCHIG00000010440,FBXL20,RAP1B,PPT1,DGKB,SNAP25,BDNF,ABHD6,KCTD13,NETO1,CASK,SYT7,MAPK1,SYP,SLC4A8,KRAS,CLSTN2,PTPRS,ENSCHIG00000015151,CPLX2,TMOD2,PCDH17,SLC8A2,CACNG5,ENSCHIG00000026818,SLC4A10,ENSCHIG00000013367,HT…
GO:BP	chemical synaptic transmission	GO:0007268	1.44776e-05	4.8393	347	4434	149	15439	ADIPOQ,EPHA4,LRRC4,GABRG1,GRIA1,CRHBP,HOMER1,CACNB2,SLC7A11,CHRNB1,MPP2,CARTPT,LYPD1,SHANK2,RIN1,RAB3B,BRAF,SYT1,ATF4,FYN,ARID1B,GJD2,NAPB,YTHDF1,LIN7C,PLEKHG5,GLRB,BAIAP2,PAFAH1B1,ENSCHIG00000010440,FBXL20,RAP1B,PPT1,DGKB,SNAP25,BDNF,ABHD6,KCTD13,NETO1,CASK,SYT7,MAPK1,SYP,SLC4A8,KRAS,CLSTN2,PTPRS,ENSCHIG00000015151,CPLX2,TMOD2,PCDH17,SLC8A2,CACNG5,ENSCHIG00000026818,SLC4A10,ENSCHIG00000013367,HT…
GO:BP	trans-synaptic signaling	GO:0099537	1.56585e-05	4.80525	353	4434	151	15439	ADIPOQ,EPHA4,LRRC4,GABRG1,GRIA1,CRHBP,HOMER1,CACNB2,SLC7A11,CHRNB1,MPP2,CARTPT,LYPD1,SHANK2,RIN1,RAB3B,BRAF,SYT1,ATF4,FYN,ARID1B,GJD2,NAPB,YTHDF1,LIN7C,PLEKHG5,GLRB,BAIAP2,PAFAH1B1,ENSCHIG00000010440,FBXL20,DAG1,RAP1B,PPT1,DGKB,SNAP25,BDNF,ABHD6,KCTD13,NETO1,CASK,SYT7,MAPK1,SYP,SLC4A8,KRAS,CLSTN2,PTPRS,ENSCHIG00000015151,CPLX2,TMOD2,PCDH17,SLC8A2,CACNG5,ENSCHIG00000026818,SLC4A10,ENSCHIG000000133…
GO:BP	transmembrane receptor protein tyrosine kinase signaling pathway	GO:0007169	1.75129e-05	4.75664	402	4434	168	15439	ADIPOQ,EPHA4,IGF1,FGF7,SOCS5,PDGFC,MYOCD,PIK3R1,ADAMTS12,BMP5,HGF,APC,PRLR,DDR1,GAREM1,RABGEF1,F3,C2CD5,RBPJ,CYFIP2,RAB14,NR4A3,PHIP,HIF1A,IGFBP5,THBS1,RHOQ,LYN,CBL,PTPN11,CRK,EPN2,MET,GHRHR,HHIP,CSF1,CAV2,PTPRJ,TRIM72,PDGFA,PLEKHA1,MAPK1,FRS2,ENPP1,SOS1,NRP1,SNX5,FAM83A,SORL1,SH2B3,GPLD1,CHMP6,SOX9,GIT1,ENSCHIG00000017892,ITGA1,EGFR,PID1,EPHA3,DDR2,RPE65,SOCS2,PTPRR,PDGFRA,KDR,LOX,SH3TC2,SLC39A1…
GO:BP	cell cycle	GO:0007049	1.79407e-05	4.74616	1071	4434	390	15439	IQGAP3,PSRC1,FIGNL1,IGF1,NCAPG,CCNG2,GJA1,CEP68,ENSCHIG00000017508,PARD3,RRP8,TRIM21,AHCTF1,MYOCD,DCUN1D3,KIF20B,KIF11,WAPL,HEPACAM2,APC,ANGEL2,SNX18,CACUL1,NAA50,VPS4B,ESCO1,CEP76,SEH1L,MARF1,MEIOB,SBDS,LZTS2,SFPQ,ANK3,REEP3,PPP1R12A,EPS8,PDS5A,APBB2,STAG1,ARF1,KAT2B,HECA,NIN,THBS1,MEIS2,NCAPH,BIRC6,NACC2,DACH1,PDS5B,NUDT15,WAC,RAD21,MCM4,WEE1,NPAT,DYRK3,PTPN11,MAP9,RBL2,PAFAH1B1,MEIOC,ERN1,ERCC…
GO:BP	cellular response to nitrogen compound	GO:1901699	2.06758e-05	4.68454	377	4434	159	15439	ADIPOQ,EPHA4,IGF1,LAMTOR3,CRHBP,UBR1,PDGFC,PIK3R1,PDE12,CFTR,APC,LYPD1,HCN1,GLP1R,COLEC12,CPEB3,CACNA2D1,C2CD5,CASP6,LARP1,PHIP,FYN,KAT2B,IGFBP5,RHOQ,TBC1D4,SSH1,PTPN11,ENSCHIG00000010440,RAP1B,GHRHR,PKD2,DNMT3A,CAV2,ZFP36L1,CPEB1,TRIM72,UBR2,MAPK3,AQP8,RRAGC,MAPK1,CTNNA1,ENPP1,SNX5,SORL1,GPLD1,NR4A2,SOX9,PID1,HTR2B,RPE65,SOCS2,PDGFRA,OTOP1,STING1,SLC39A14,HTR1B,MAP3K5,SMPD3,RAP1A,HTR5A,FER,RAB31…
GO:BP	renal system development	GO:0072001	2.17226e-05	4.66309	224	4434	104	15439	ADIPOQ,EPHA4,NFIA,MYOCD,GREB1L,TRAF3IP1,LZTS2,GCNT1,RRM2B,YAP1,NPHS2,SALL1,DLG1,PKD2,PCSK5,BDNF,EMX2,RARB,SMAD4,PDGFA,NOTCH2,ENSCHIG00000026624,FRAS1,PAX8,AP1B1,SOX9,PDGFRA,SMAD5,RDH10,PECAM1,ADAMTS6,ARID5B,NPNT,ADAMTS1,SMAD3,PROX1,FOXC1,SOX4,HES1,C1GALT1,PROM1,PTCH1,PYGO1,EPCAM,EYA1,ZBTB16,KIF26B,FAT4,CTNNB1,EPHA7,FGFR1,TGFBR1,NUP160,FOXC2,GDNF,PYGO2,ITGA3,TBX18,NUP133,WDPCP,UMOD,BICC1,LRRK2,ZMP…
GO:BP	regulation of kinase activity	GO:0043549	2.19157e-05	4.65924	549	4434	218	15439	KITLG,ADIPOQ,EPHA4,IQGAP3,PSRC1,IGF1,LAMTOR3,SOCS5,PKIA,PDGFC,MYOCD,CARTPT,HGF,PAQR3,APC,ADRA2B,SFRP2,LCP2,PRLR,CACUL1,DUSP4,ITSN1,PRKAG2,MDFIC,DUSP6,VLDLR,KAT2B,GRM1,THBS1,ABI1,LYN,PTPN11,RBL2,MMD,PPM1E,ERN1,TGFBR2,DLG1,INKA2,PKD2,HIPK3,STRADA,CD19,CSF1,PTPRJ,NEDD9,TNFRSF11A,PDGFA,MAPK3,ERCC6,MAPK1,FRS2,CCNL1,RAP2B,GNAQ,LPAR1,SASH1,AJUBA,DGKZ,SORL1,HNRNPU,PIK3IP1,CORO1C,SH2B3,NLRC5,ZEB2,SLC8A2,C…
GO:BP	cellular protein catabolic process	GO:0044257	2.27275e-05	4.64345	505	4434	203	15439	TTC3,EPHA4,RHBDD1,PRICKLE1,USP15,BBS7,AFG1L,UBR1,SOCS5,ITCH,YOD1,ENC1,GZMA,ADAMTS12,TRIM25,CAMLG,UBR3,CACUL1,RYBP,FOXF2,VPS4B,RNF125,FBXL19,RNF216,ATE1,IDE,VPS37A,SVIP,USP1,GLMN,TMEM129,CTSB,PLAA,VPS13A,USP25,UBE2J1,STYX,USP34,PCYOX1,NUDT15,WAC,CBL,EDEM3,UBE3A,ENSCHIG00000016989,PPT1,UBA6,UBQLN1,RNF111,PSMF1,UBE4A,DTL,RNF185,KCTD13,FBXO33,TRIM72,EDEM1,UBR2,MYLIP,NEDD4L,TGFB1I1,ATP13A2,HACE1,ARIH1…
GO:BP	axon development	GO:0061564	2.32108e-05	4.63431	304	4434	133	15439	EPHA4,SPART,INPP5F,DDR1,ANK3,DOCK7,BRAF,APBB2,C9ORF72,NIN,YTHDF1,MATN2,PTPN11,ARHGAP35,PAFAH1B1,DAG1,FN1,AMIGO1,PLPPR4,BDNF,FOXP1,BMPR1B,SMAD4,PICALM,SLITRK2,NRCAM,CRPPA,PTPRS,PALLD,UST,OTX2,NRP1,TCTN1,ALCAM,ZEB2,VASP,NR4A2,MAP3K13,KLF7,CREB1,MAP2,SEMA3A,MYOT,WDR36,NFIB,SLITRK6,FLRT3,PAX6,CHL1,SRF,SPAST,LIMK1,SVBP,HOXA2,EPHA5,EFNA5,FSTL4,APP,FZD3,CNR1,ITGB1,RAPH1,VASH2,KIAA0319,NUMBL,KIF5C,NDEL1,…
GO:BP	morphogenesis of an epithelium	GO:0002009	2.41475e-05	4.61713	372	4434	157	15439	CXCL10,ARL13B,EPHA4,PRICKLE1,LEF1,GJA1,FGF7,TGM2,ADAMTS12,KIF20B,HGF,SFRP2,DDR1,FOXF2,GREB1L,TRAF3IP1,LZTS2,GLMN,RBPJ,HIF1A,IGFBP5,CLIC4,PCDH8,CYP7B1,LIN7C,YAP1,KDM5B,SALL1,ARHGAP35,ACTG1,PAFAH1B1,DAG1,TGFBR2,DLG1,MET,PKD2,RSPO3,HHIP,FOXP1,CSF1,SMAD4,TGFB1I1,NOTCH2,FRS2,KRAS,FRAS1,WDR1,MYO9A,AJUBA,SOS1,PAX8,STK3,IHH,TCTN1,ZEB2,VASP,SOX9,BTBD7,TP63,SEMA3A,KDR,FLRT3,RDH10,ADM,SRF,NPNT,SMAD3,PROX1,R…
GO:BP	negative regulation of developmental process	GO:0051093	2.45348e-05	4.61022	672	4434	259	15439	CXCL10,ADIPOQ,CLDN18,EPHA4,PGLYRP3,ECM1,MEOX2,PRICKLE1,IGF1,LEF1,ASPN,GJA1,SOCS5,SPART,RAP1GAP2,MYOCD,PIK3R1,ADAMTS12,INPP5F,PAQR3,GNRH1,TMEM64,SFRP2,PPARD,TRAF3IP1,HOOK3,RBPJ,PTBP1,HIF1A,IGFBP5,THBS1,MEIS2,LYN,DDX6,YAP1,RC3H1,PTPN11,TMEM131L,NFATC3,EPN2,NFKBIA,ATF2,MEIS1,TCF23,SNAI2,STMN2,BDNF,MINAR1,FOXP1,RARB,THRB,ZFP36L1,TRIM72,MYLIP,SMAD4,ZADH2,TWSG1,TGFB1I1,MAPK1,PIAS3,CDK6,FRS2,KRAS,AP1AR,…
GO:BP	urogenital system development	GO:0001655	2.53233e-05	4.59648	249	4434	113	15439	ADIPOQ,EPHA4,NFIA,MYOCD,GREB1L,TRAF3IP1,LZTS2,GCNT1,RRM2B,CYP7B1,YAP1,NPHS2,SALL1,UBE3A,DLG1,PKD2,PCSK5,BDNF,EMX2,RARB,SMAD4,PDGFA,NOTCH2,ENSCHIG00000026624,FRS2,FRAS1,PAX8,AP1B1,SOX9,TP63,PDGFRA,SMAD5,RDH10,PECAM1,ADAMTS6,ARID5B,NPNT,ADAMTS1,SMAD3,PROX1,FOXC1,SOX4,HES1,C1GALT1,PROM1,PTCH1,PYGO1,EPCAM,EYA1,ZBTB16,KIF26B,FAT4,CTNNB1,EPHA7,FGFR1,TGFBR1,NUP160,FOXC2,GDNF,PYGO2,ITGA3,TBX18,NUP133,WDP…
GO:BP	organic cyclic compound metabolic process	GO:1901360	2.75273e-05	4.56024	4391	4434	1403	15439	RIDA,CCT8,ATP6V1A,ADIPOQ,EPC2,ORC4,IKZF2,KHDRBS1,ECM1,PSRC1,DR1,NFIA,DHCR24,TUT4,FIGNL1,MEOX2,TWISTNB,HBP1,POT1,PRICKLE1,CNOT2,IGF1,YARS2,BBS7,LEF1,TRMT10A,KLF3,SULT1B1,SLC4A4,THAP9,NR3C1,SLU7,ZBTB5,EBF2,IARS1,NCOA7,ENSCHIG00000020077,ENSCHIG00000017313,TBPL1,BCLAF1,NT5E,TTC5,ICE2,FGF7,ENSCHIG00000018361,ENSCHIG00000027081,TGDS,EPC1,ITCH,NCOA2,HEY1,ABRA,ESRP1,RRP8,TRIM21,CSTF3,EHF,AHCTF1,EXO1,SLC…
GO:BP	negative regulation of programmed cell death	GO:0043069	2.76778e-05	4.55787	580	4434	228	15439	KITLG,RHBDD1,DHCR24,FIGNL1,IGF1,NDNF,LEF1,TNFAIP8,ATG5,ITCH,ADNP,MYOCD,PIK3R1,MITF,TMEM14A,RRN3,DDIAS,HGF,SFRP2,PRLR,ACKR3,ITSN1,BRAF,APBB2,GABRB2,PHIP,HIF1A,TYRO3,THBS1,MERTK,BIRC6,NAA16,MTDH,RRM2B,ENSCHIG00000021932,CBL,YAP1,DYRK3,PPT1,MET,CHST11,BCL2L2,SNAI2,BDNF,HIPK3,API5,AXL,FOXP1,GCLC,GPAM,RARB,DCPS,RASA1,DOCK8,RTKN2,KRAS,CTNNA1,CAAP1,CAMK1D,HSPD1,NR4A2,SOX9,EGFR,SON,OPA1,BCL6,PIK3CA,NEURO…
GO:BP	organonitrogen compound metabolic process	GO:1901564	2.86512e-05	4.54286	5317	4434	1676	15439	KITLG,RIDA,ATP6V1A,RABL3,XXYLT1,MASP1,ADIPOQ,DCUN1D1,NCEH1,TTC3,PPIG,DPP10,EPHA4,RHBDD1,KHDRBS1,DHDDS,IQGAP3,PGLYRP3,ECM1,PSRC1,DR1,ENSCHIG00000013246,DHCR24,NAPEPLD,FKBP14,YAE1,PRICKLE1,USP15,IGF1,NUAK1,YARS2,CLEC7A,BBS7,NDNF,LEF1,TBCK,LAMTOR3,PPM1K,SULT1B1,SLC4A4,MAPK10,TNFAIP8,GM2A,ARRDC3,GALNTL6,CDC14C,IARS1,ENSCHIG00000010087,NCOA7,ENSCHIG00000020077,CDK19,AFG1L,ENSCHIG00000017313,ATG5,TBPL1…
GO:BP	skeletal system development	GO:0001501	3.09415e-05	4.50946	376	4434	158	15439	CLDN18,ECM1,ANO6,IGF1,SLC9B2,PIP4K2A,SLC10A7,PDGFC,ADAMTS12,SFRP2,SBDS,USP1,WNT5B,HIF1A,PAX7,ABI1,PTPN11,GLG1,PAFAH1B1,TGFBR2,DLG1,CHST11,SOX5,PCSK5,MEIS1,SNAI2,HHIP,HOXB9,TRIP11,WDR48,FOXP1,RARB,BMPR1B,NAB1,MEX3C,MAPK3,PLEKHA1,SNX19,FLI1,NOTCH2,HOXA3,ALPL,IHH,SATB2,SH2B3,SOX9,RAI1,AKAP13,TP63,PRKRA,LNPK,PDGFRA,LOX,SMAD5,NFIB,SLC39A14,KIAA1217,BPNT2,RDH10,MMP16,MMP13,SMPD3,SRF,ARID5B,LRRC17,SMAD3…
GO:BP	positive regulation of phosphate metabolic process	GO:0045937	3.24538e-05	4.48873	710	4434	271	15439	KITLG,ADIPOQ,EPHA4,IQGAP3,PSRC1,IGF1,LAMTOR3,SLC4A4,FGF7,TNFSF18,PDGFC,CLIP3,CARTPT,BMP5,HGF,ADRA2B,SFRP2,LCP2,PRLR,CACUL1,GAREM1,ACKR3,CHP2,ITSN1,DOCK7,GLMN,PRKAG2,BRAF,MDFIC,PPP1R12A,PJA2,PTBP1,VLDLR,FYN,GRM1,THBS1,ABI1,LYN,ACSL3,PTPN11,MMD,ERN1,TGFBR2,RAP1B,DLG1,PKD2,TEC,BDNF,STRADA,CD19,CSF1,CAV2,NEDD9,TNFRSF11A,SMAD4,TWSG1,PDGFA,MAPK3,ERCC6,MAPK1,NOTCH2,FRS2,KRAS,RAP2B,LPAR1,ENSCHIG000000151…
GO:BP	positive regulation of phosphorus metabolic process	GO:0010562	3.24538e-05	4.48873	710	4434	271	15439	KITLG,ADIPOQ,EPHA4,IQGAP3,PSRC1,IGF1,LAMTOR3,SLC4A4,FGF7,TNFSF18,PDGFC,CLIP3,CARTPT,BMP5,HGF,ADRA2B,SFRP2,LCP2,PRLR,CACUL1,GAREM1,ACKR3,CHP2,ITSN1,DOCK7,GLMN,PRKAG2,BRAF,MDFIC,PPP1R12A,PJA2,PTBP1,VLDLR,FYN,GRM1,THBS1,ABI1,LYN,ACSL3,PTPN11,MMD,ERN1,TGFBR2,RAP1B,DLG1,PKD2,TEC,BDNF,STRADA,CD19,CSF1,CAV2,NEDD9,TNFRSF11A,SMAD4,TWSG1,PDGFA,MAPK3,ERCC6,MAPK1,NOTCH2,FRS2,KRAS,RAP2B,LPAR1,ENSCHIG000000151…
GO:BP	blood vessel morphogenesis	GO:0048514	3.74875e-05	4.42611	423	4434	174	15439	CXCL10,ECM1,MEOX2,NDNF,LEF1,HEY1,MYOCD,SFRP2,ACKR3,ETS1,GLMN,F3,SP1,RBPJ,RECK,QKI,HIF1A,THBS1,CYP1B1,CLIC4,MTDH,AGO2,YAP1,ACTG1,VEZF1,EPN2,TGFBR2,ATF2,PKD2,RSPO3,RHOJ,MEIS1,MINAR1,RASA1,ZFP36L1,C6,ADAM12,NOTCH2,HOXA3,NRCAM,E2F7,ARID2,ENSCHIG00000021309,SASH1,THBS2,SOS1,NRP1,IHH,PARVA,PIK3C2A,GPLD1,GADD45A,ENSCHIG00000023971,ASB4,PDGFRA,KDR,CXCL8,LDLR,LOX,ANXA1,ADM,TMEM100,PECAM1,SRF,E2F8,RAP1A,AD…
GO:BP	cytoskeleton organization	GO:0007010	4.34133e-05	4.36238	957	4434	351	15439	ABI2,PSRC1,GAS2L3,TBCK,SLAIN2,GJA1,FGF7,DAAM1,GCC2,CEP68,CDC42BPA,CLIP3,PIK3R1,KIF11,PDLIM3,HEPACAM2,APC,TTLL6,ENSCHIG00000023712,CD2AP,VPS4B,CEP76,EPB41L3,TRAF3IP1,SBDS,LZTS2,HOOK3,IKBKB,ANK3,MCU,PPFIA1,HOOK1,DOCK7,BRAF,KLHL24,PPP1R12A,EPS8,CEP70,CYFIP2,STAG1,C9ORF72,DYRK1A,PHIP,KAT2B,JMY,GMFB,TLN2,NIN,RHOQ,CYRIA,ABI1,EPB41L1,ARFGEF1,MTSS1,WEE1,NPHS2,SSH1,MAP9,GAN,ARHGAP35,FMNL2,ACTG1,BAIAP2,PPM…
GO:BP	regulation of cell motility	GO:2000145	4.68404e-05	4.32938	637	4434	246	15439	KITLG,CXCL10,CLDN1,ADIPOQ,ECM1,MEOX2,ANO6,IGF1,KLRK1,CLEC7A,LEF1,GJA1,FGF7,TNFSF18,MYOCD,PIK3R1,MITF,RIPOR2,ONECUT2,PRKG1,KIF20B,INPP5F,HGF,GNRH1,APC,SFRP2,RABGEF1,MCU,ETS1,DOCK7,BRAF,SP1,TIAM1,WNT5B,ATP8A1,PLAA,RECK,NR4A3,HIF1A,SEMA6D,IGFBP5,THBS1,CYP1B1,CLIC4,DACH1,LYN,AGO2,RRAS2,AMOTL1,ACTG1,CRK,ENSCHIG00000019133,CCDC125,FRMD5,DAG1,TGFBR2,FN1,MET,RHOJ,SNAI2,FOXP1,ABHD6,PLAU,CSF1,DOCK8,PTPRJ,L…
GO:BP	proteolysis involved in cellular protein catabolic process	GO:0051603	4.76738e-05	4.32172	465	4434	188	15439	TTC3,EPHA4,RHBDD1,PRICKLE1,USP15,BBS7,UBR1,SOCS5,ITCH,YOD1,ENC1,GZMA,ADAMTS12,TRIM25,CAMLG,UBR3,CACUL1,RYBP,FOXF2,VPS4B,RNF125,FBXL19,RNF216,ATE1,IDE,VPS37A,SVIP,USP1,GLMN,TMEM129,CTSB,PLAA,USP25,UBE2J1,STYX,USP34,PCYOX1,NUDT15,WAC,CBL,EDEM3,UBE3A,ENSCHIG00000016989,UBA6,UBQLN1,RNF111,PSMF1,UBE4A,DTL,RNF185,KCTD13,FBXO33,TRIM72,EDEM1,UBR2,MYLIP,NEDD4L,TGFB1I1,HACE1,ARIH1,PSMA7,OSBPL7,FBXO22,KCNE2…
GO:BP	regulation of locomotion	GO:0040012	5.39052e-05	4.26837	668	4434	256	15439	KITLG,CXCL10,CLDN1,ADIPOQ,CXCR4,ECM1,MEOX2,ANO6,IGF1,KLRK1,CLEC7A,LEF1,ARRDC3,GJA1,FGF7,TNFSF18,MYOCD,PIK3R1,MITF,RIPOR2,ONECUT2,PRKG1,KIF20B,INPP5F,HGF,GNRH1,APC,SFRP2,RABGEF1,MCU,ETS1,DOCK7,BRAF,SP1,TIAM1,WNT5B,ATP8A1,PLAA,RECK,NR4A3,HIF1A,SEMA6D,IGFBP5,THBS1,CYP1B1,CLIC4,DACH1,YTHDF1,LYN,AGO2,RRAS2,AMOTL1,ACTG1,CRK,ENSCHIG00000019133,CCDC125,FRMD5,DAG1,TGFBR2,FN1,MET,RHOJ,SNAI2,FOXP1,ABHD6,PLA…
GO:BP	regulation of mRNA metabolic process	GO:1903311	5.64106e-05	4.24864	158	4434	78	15439	RIDA,KHDRBS1,PDE12,SRPK1,RNF40,MBNL2,ANGEL2,RBM24,CPEB3,TENT5C,CPSF6,LARP1,PTBP1,DYRK1A,SYNCRIP,SAP18,AGO2,RC3H1,MEIOC,IWS1,ZFP36L1,CPEB1,HMX2,ZC3HAV1,KHSRP,NCBP1,PUM2,CDK9,HNRNPU,SRSF9,DDX5,CCNT1,SON,CNOT6L,CNOT8,SRSF7,NSRP1,ENSCHIG00000013372,CELF4,TNRC6B,SRSF12,TIA1,TOB1,RBM11,RBM23,VIRMA,CELF5,ZBTB7A,ENSCHIG00000022904,GDNF,FASTKD1,THRAP3,LEO1,CTR9,TARDBP,CARHSP1,DHX36,ZFP36L2,ALKBH5,FUS,NANO…
GO:BP	rhythmic process	GO:0048511	5.66944e-05	4.24646	179	4434	86	15439	MAPK10,NCOA2,KLF9,SFPQ,RBM4B,GAS2,NHLH2,NAMPT,ENSCHIG00000019440,ATF4,DYRK1A,ENSCHIG00000018293,TYRO3,GFPT1,KLF10,UBE3A,BDNF,PER3,AXL,BMPR1B,TNFRSF11A,PLEKHA1,GPR176,HNRNPU,RAI1,DDX5,TP63,CREB1,MTTP,PDGFRA,ADAMTS1,PROX1,KDM2A,PRKAA2,PTX3,EP300,EGR1,MAPK9,NTRK2,NFIL3,RORB,PPP1CB,SETX,FBXL3,FBXW11,HNF4A,PER1,NTRK3,HTR7,PTN,PGR,KCNA2,THRAP3,TARDBP,FBXW7,TP53,CDK1,SGPL1,SIAH2,TP73,PHLPP1,PER2,ENSCHIG…
GO:BP	organic substance catabolic process	GO:1901575	5.83263e-05	4.23414	1329	4434	469	15439	RIDA,ADIPOQ,TTC3,EPHA4,RHBDD1,PGLYRP3,TUT4,NAPEPLD,PRICKLE1,USP15,IGF1,BBS7,SULT1B1,SLC4A4,GM2A,AFG1L,NT5E,UBR1,SORD,SOCS5,ITCH,GLYATL2,YOD1,ENC1,GZMA,ADAMTS12,MTRR,PDE12,ENSCHIG00000015705,ENSCHIG00000006638,HOGA1,INPP5F,TRIM25,CAMLG,APC,UBR3,ANGEL2,PIPOX,CACUL1,RYBP,PPARD,RBM24,FOXF2,VPS4B,RNF125,FBXL19,SMG1,RNF216,ATE1,IDE,CPEB3,AGO3,VPS37A,SVIP,ITSN1,USP1,GLMN,TENT5C,PRKAG2,LIPH,TMEM129,LARP1…
GO:BP	axonogenesis	GO:0007409	6.11531e-05	4.21358	280	4434	123	15439	EPHA4,SPART,ANK3,DOCK7,BRAF,APBB2,C9ORF72,NIN,YTHDF1,MATN2,PTPN11,ARHGAP35,PAFAH1B1,DAG1,FN1,PLPPR4,BDNF,FOXP1,BMPR1B,SMAD4,PICALM,SLITRK2,NRCAM,CRPPA,PTPRS,PALLD,UST,OTX2,NRP1,TCTN1,ALCAM,ZEB2,VASP,NR4A2,MAP3K13,KLF7,CREB1,MAP2,SEMA3A,MYOT,WDR36,NFIB,SLITRK6,FLRT3,PAX6,CHL1,SRF,SPAST,LIMK1,HOXA2,EPHA5,EFNA5,FSTL4,APP,FZD3,ITGB1,RAPH1,KIAA0319,NUMBL,KIF5C,NDEL1,MYH10,PTPRZ1,EPHA7,NTNG1,SLIT1,GBX2…
GO:BP	positive regulation of signal transduction	GO:0009967	6.19657e-05	4.20785	1025	4434	372	15439	KITLG,ADIPOQ,CXCR4,EPHA4,IQGAP3,LURAP1,USP15,IGF1,LAMTOR3,TMEM33,BCLAF1,ABRA,TNFSF18,MYOCD,CARTPT,PIK3R1,BMP5,GPR137B,TSPYL5,TRIM25,HGF,ADRA2B,SFRP2,PRLR,PPARD,GAREM1,SEH1L,ACKR3,CHP2,SFPQ,AGO3,IKBKB,ITSN1,F3,BRAF,MDFIC,LMO3,RBPJ,PJA2,CYFIP2,TXNDC15,PTBP1,RECK,FYN,GRM1,HIF1A,IGFBP5,THBS1,CYP1B1,USP34,AAK1,NACC2,MTDH,UBR5,LYN,CBL,YAP1,RC3H1,PTPN11,SALL1,PAFAH1B1,EPN2,ERN1,CREBRF,UBE3A,RAP1B,PKD2,R…
GO:BP	synaptic signaling	GO:0099536	6.30698e-05	4.20018	365	4434	153	15439	ADIPOQ,EPHA4,LRRC4,GABRG1,GRIA1,CRHBP,HOMER1,CACNB2,SLC7A11,CHRNB1,MPP2,CARTPT,LYPD1,SHANK2,RIN1,RAB3B,BRAF,SYT1,ATF4,FYN,ARID1B,GJD2,NAPB,YTHDF1,LIN7C,PLEKHG5,GLRB,BAIAP2,PAFAH1B1,ENSCHIG00000010440,FBXL20,DAG1,RAP1B,PPT1,DGKB,SNAP25,BDNF,ABHD6,KCTD13,NETO1,CASK,SYT7,MAPK1,SYP,SLC4A8,KRAS,CLSTN2,PTPRS,ENSCHIG00000015151,CPLX2,TMOD2,PCDH17,SLC8A2,CACNG5,ENSCHIG00000026818,SLC4A10,ENSCHIG000000133…
GO:BP	regulation of transferase activity	GO:0051338	6.46312e-05	4.18956	615	4434	238	15439	KITLG,ADIPOQ,EPHA4,IQGAP3,PSRC1,POT1,IGF1,LAMTOR3,ARRDC3,SOCS5,PKIA,PDGFC,RFC5,MYOCD,CARTPT,HGF,PAQR3,APC,ADRA2B,SFRP2,LCP2,PRLR,CACUL1,DUSP4,ITSN1,PRKAG2,MDFIC,DUSP6,VLDLR,KAT2B,GRM1,THBS1,ABI1,LYN,PTPN11,RBL2,MMD,PPM1E,ERN1,TGFBR2,DLG1,INKA2,PKD2,HMBOX1,HIPK3,STRADA,CD19,CSF1,PTPRJ,NEDD9,TNFRSF11A,PDGFA,MAPK3,ERCC6,MAPK1,FRS2,CCNL1,RAP2B,GNAQ,LPAR1,SASH1,AJUBA,DGKZ,SORL1,HNRNPU,PIK3IP1,CORO1C,S…
GO:BP	tissue morphogenesis	GO:0048729	6.48016e-05	4.18841	452	4434	183	15439	CXCL10,ARL13B,EPHA4,PRICKLE1,LEF1,GJA1,FGF7,TGM2,ADAMTS12,KIF20B,HGF,SFRP2,DDR1,FOXF2,GREB1L,TRAF3IP1,LZTS2,GLMN,RBPJ,GCNT1,HIF1A,IGFBP5,PAX7,CLIC4,PCDH8,CYP7B1,LIN7C,YAP1,KDM5B,SALL1,ARHGAP35,ACTG1,PAFAH1B1,DAG1,TGFBR2,DLG1,MET,PKD2,RSPO3,HHIP,FOXP1,CSF1,SMAD4,TWSG1,TGFB1I1,NOTCH2,FRS2,KRAS,FRAS1,WDR1,MYO9A,AJUBA,SOS1,PAX8,STK3,IHH,TCTN1,ZEB2,VASP,SOX9,BTBD7,TP63,SEMA3A,KDR,FLRT3,RDH10,ADM,UBE4B…
GO:BP	cellular response to organic cyclic compound	GO:0071407	6.61023e-05	4.17978	314	4434	135	15439	CNOT2,LEF1,NR3C1,CRHBP,PDE12,LCOR,CFTR,KLF9,HCN1,COLEC12,LMO3,CASP6,LARP1,IGFBP5,CYP1B1,UBR5,CYP7B1,YAP1,SSH1,CREBRF,UBE3A,RAP1B,GHRHR,PKD2,SNAI2,FOXP1,CAV2,ZFP36L1,MAPK3,AQP8,MAPK1,EIF4E,CTNNA1,UBA5,ALPL,HNRNPU,GPLD1,OSBPL7,DDX5,AKAP13,EGFR,TP63,HTR2B,RBFOX2,SMAD5,STING1,ANXA1,HTR1B,UFL1,DNAAF4,HNF4G,CASP9,RAP1A,HTR5A,P2RY13,ADCY5,GNAI3,TRIM24,P2RY1,EP300,EPHA5,EFNA5,PPARGC1B,PTCH1,LATS1,SRC,GRA…
GO:BP	negative regulation of phosphorylation	GO:0042326	6.88315e-05	4.16221	317	4434	136	15439	ADIPOQ,SOCS5,ITCH,PKIA,MYOCD,PDE12,INPP5F,HGF,PAQR3,APC,SFRP2,TRAF3IP1,RABGEF1,DUSP4,PRKAG2,DUSP6,LMO3,C9ORF72,CD109,KAT2B,LYN,PPM1E,PAFAH1B1,DAG1,SAMSN1,DLG1,INKA2,PWP1,HIPK3,PTPRJ,SMAD4,SNX25,TIMP3,GNAQ,ENPP1,AJUBA,PMEPA1,SORL1,HNRNPU,PIK3IP1,CORO1C,SH2B3,CHMP6,CTDSPL,PID1,ENSCHIG00000022600,GADD45A,PTPRR,CTDSP2,PAX6,PRDX3,RANBP9,PRKRIP1,CDKN1C,ASH1L,C3ORF33,FBLN1,NCK1,LATS1,HMGCR,ATG14,SPRED2,…
GO:BP	regulation of response to stress	GO:0080134	7.11995e-05	4.14752	899	4434	331	15439	CLDN1,ADIPOQ,EPHA4,SYT11,FIGNL1,NAPEPLD,POT1,ANO6,USP15,IGF1,NUAK1,KLRK1,CLEC7A,TMEM33,NCOA7,BCLAF1,NT5E,CRHBP,SOCS5,ITCH,YOD1,SLC7A11,PIK3R1,ADAMTS12,ENSCHIG00000008358,PRKG1,INPP5F,DDIAS,HGF,SFRP2,SMCHD1,ILRUN,RNF125,TRAF3IP1,SMG1,RABGEF1,RNF216,ACKR3,SFPQ,ETS1,KMT5B,SVIP,USP1,BRAF,MDFIC,SLC38A2,LETM1,PJA2,USP25,DYRK1A,CD109,UBE2J1,HIF1A,GCH1,TYRO3,THBS1,NACC2,UBR5,ARFGEF1,YTHDF3,LYN,DYRK3,TRPC…
GO:BP	immune system development	GO:0002520	7.32784e-05	4.13502	670	4434	256	15439	KITLG,RABL3,ADIPOQ,CLDN18,PGLYRP3,LEF1,SLC9B2,ATG5,SOCS5,PIP4K2A,ITCH,EXO1,ATXN1L,PIK3R1,MITF,TMEM64,SFRP2,SBDS,POLB,ETS1,KMT5B,BRAF,CACNA1C,ATF4,RBPJ,CD109,SATB1,HIF1A,STON2,TYRO3,MEIS2,MERTK,ABI1,KLF10,LYN,DYRK3,RC3H1,PTPN11,TMEM131L,PAFAH1B1,TP53BP1,IREB2,JAG2,NFKBIA,TGFBR2,RBM47,MEIS1,AXL,AZI2,SLC25A38,FOXP1,CD19,CSF1,ZFP36L1,RTKN2,JARID2,TNFRSF11A,TWSG1,MAPK3,SH3PXD2A,PICALM,FLI1,MAPK1,TFE3,…
GO:BP	secretion	GO:0046903	7.48858e-05	4.1256	646	4434	248	15439	OPRK1,RAPGEF4,SYT11,VPS45,IGF1,SLC9B2,GJA1,ATG5,CRHBP,FGF7,BLOC1S6,CACNB2,CARTPT,RAB27B,CFTR,LCP2,EXOC2,CD2AP,VPS4B,RABGEF1,RAB11FIP2,CCDC186,MCU,RAB3B,GLMN,BRAF,RAB21,SYT1,PRSS12,HIF1A,SYT16,TYRO3,MERTK,TRPC4,NAPB,LYN,RIMS1,ACSL3,LIN7C,KDM5B,PTPN11,EXOC3L2,PAFAH1B1,ENSCHIG00000010440,FBXL20,RAP1B,FN1,PPT1,GHRHR,RFX3,PCSK5,SNAP25,BDNF,ARFIP1,AXL,GPAM,PLA2G12A,AP1G1,TRIM72,ILDR2,CASK,TNFRSF11A,SMA…
GO:BP	embryonic organ development	GO:0048568	9.17601e-05	4.03735	341	4434	144	15439	KITLG,ARL13B,LEF1,PDGFC,RIPOR2,FOXF2,TRAF3IP1,HIPK1,ARNT,ATF4,RBPJ,HIF1A,BIRC6,YAP1,SALL1,TGFBR2,DLG1,CHST11,PKD2,PCSK5,RSPO3,WDR48,RARB,ZFP36L1,MAPK3,HMX2,MAPK1,NOTCH2,HOXA3,ARID2,FRS2,STK3,IHH,SATB2,SH2B3,SOX9,NEUROD1,PRKRA,PDGFRA,CXCL8,OTOP1,RDH10,MMP16,ADM,PAX6,SRF,E2F8,SMAD3,NCOA1,PROX1,ENSCHIG00000016809,FOXC1,RBBP6,MIB1,STOX1,HES1,HOXA2,HOXC4,FZD3,PTCH1,HEY2,FBN1,ZEB1,MAFB,CEBPB,EYA1,FZD5,…
GO:BP	positive regulation of cellular component movement	GO:0051272	9.88818e-05	4.00488	370	4434	154	15439	KITLG,CXCL10,CLDN1,ANO6,IGF1,CLEC7A,LEF1,FGF7,TNFSF18,PIK3R1,RIPOR2,ONECUT2,KIF20B,HGF,APC,TTLL6,MCU,ETS1,DOCK7,SP1,TIAM1,WNT5B,ATP8A1,PLAA,NR4A3,HIF1A,SEMA6D,IGFBP5,THBS1,LYN,AGO2,RRAS2,AMOTL1,ACTG1,ENSCHIG00000019133,TGFBR2,FN1,MET,RHOJ,SNAI2,FOXP1,PLAU,CSF1,DOCK8,LAMC2,NEDD9,PDGFA,MAPK3,MAPK1,ENSCHIG00000026624,SASH1,CAMK1D,NRP1,PIK3C2A,GPLD1,MGAT5,SOX9,SPAG9,ENSCHIG00000017892,EGFR,BCL6,DDR2,…
GO:BP	positive regulation of catabolic process	GO:0009896	9.9203e-05	4.00348	296	4434	128	15439	RIDA,ELAPOR1,PRICKLE1,IGF1,BBS7,SLC4A4,ATG5,SOCS5,PIP4K2A,ITCH,TRIM21,APC,RBM24,RNF152,CPEB3,SVIP,LARP1,C9ORF72,ENSCHIG00000018293,HIF1A,WAC,MTDH,AGO2,RC3H1,ULK2,SEC22B,UBQLN1,DTL,RNF185,ZFP36L1,VPS13D,EDEM1,MYLIP,MAPK3,ZC3HAV1,KHSRP,PIK3C2A,SORL1,SH3D19,GPLD1,TRIM65,SOX9,OSBPL7,FBXO22,KCNE2,TOMM7,TMTC3,KDR,RCHY1,CNOT6L,LDLR,STING1,CNOT8,UFL1,TRIB2,TP53INP1,RAB3GAP2,SCOC,CALCOCO2,ABCD2,PRKAA2,SH3…
GO:BP	cell adhesion	GO:0007155	0.000100115	3.9995	880	4434	324	15439	CD36,KITLG,CLDN1,ADIPOQ,CXCR4,IGF1,NUAK1,NDNF,LEF1,NT5E,CDH24,SOCS5,ITCH,TGM2,ATP1B1,TNFSF18,SLC7A11,PIK3R1,ADAMTS12,MAGI1,RIPOR2,ONECUT2,PRKG1,DDR1,PPARD,DSG2,ETS1,GLMN,BRAF,PPP1R12A,TIAM1,PCDH7,RGMB,CYFIP2,GCNT1,NR4A3,TLN2,TYRO3,THBS1,MERTK,CYP1B1,PCDH8,LYN,RC3H1,ENSCHIG00000006308,PTPN11,TMEM131L,ACTG1,CRK,FRMD5,TGFBR2,DLG1,FN1,AMIGO1,SNAI2,LYVE1,AXL,CX3CR1,GPAM,PLAU,HHLA2,CSF1,COL6A3,LMLN,RAS…
GO:BP	response to stress	GO:0006950	0.000117583	3.92966	2326	4434	776	15439	CXCL10,OPRK1,CLDN1,MASP1,ADIPOQ,CXCR4,EPHA4,RHBDD1,SYT11,PGLYRP3,ECM1,ELAPOR1,DHCR24,FIGNL1,NAPEPLD,POT1,ANO6,USP15,IGF1,NUAK1,ABCC9,KLRK1,CLEC7A,NDNF,TMEM33,G3BP1,SLU7,NCOA7,ATG5,BCLAF1,NT5E,CRHBP,HACD3,BLOC1S6,SOCS5,ITCH,RRP8,TRIM21,SLC1A2,YOD1,EXO1,SLC7A11,GTF2H3,MYOCD,ENDOV,CARTPT,PIK3R1,ADAMTS12,PDE12,ENSCHIG00000008358,PRKG1,INPP5F,DDIAS,TRIM25,HGF,CFTR,APC,ADRA2B,SRXN1,LYPD1,SFRP2,PTAFR,SM…
GO:BP	actin filament-based process	GO:0030029	0.000118985	3.92451	541	4434	212	15439	ABI2,GAS2L3,TBCK,FGF7,DAAM1,CACNB2,CDC42BPA,PIK3R1,NUP155,PDLIM3,ENSCHIG00000023712,CD2AP,DSG2,EPB41L3,IKBKB,MCU,PPFIA1,FNBP1L,BRAF,CACNA2D1,EPS8,CACNA1C,CYFIP2,C9ORF72,JMY,GMFB,RHOQ,CYRIA,ABI1,EPB41L1,ARFGEF1,MTSS1,NPHS2,SSH1,ARHGAP35,FMNL2,ACTG1,BAIAP2,PPM1E,CRK,PAFAH1B1,NCKAP1,DLG1,CAPZA1,MET,RHOJ,RANGRF,KCNJ2,FOXP1,KCTD13,ENSCHIG00000012574,RASA1,SPIRE1,SMAD4,KCND3,NOTCH2,SRI,ELMO1,TWF1,KRAS,…
GO:BP	positive regulation of locomotion	GO:0040017	0.000124701	3.90413	374	4434	155	15439	KITLG,CXCL10,CLDN1,ANO6,IGF1,CLEC7A,LEF1,FGF7,TNFSF18,PIK3R1,RIPOR2,ONECUT2,KIF20B,HGF,APC,MCU,ETS1,DOCK7,SP1,TIAM1,WNT5B,ATP8A1,PLAA,NR4A3,HIF1A,SEMA6D,IGFBP5,THBS1,LYN,AGO2,RRAS2,AMOTL1,ACTG1,ENSCHIG00000019133,TGFBR2,FN1,MET,RHOJ,SNAI2,FOXP1,PLAU,CSF1,DOCK8,LAMC2,NEDD9,PDGFA,MAPK3,MAPK1,ENSCHIG00000026624,SASH1,CAMK1D,NRP1,PIK3C2A,GPLD1,MGAT5,SOX9,SPAG9,ENSCHIG00000017892,EGFR,DDR2,SEMA3A,DOCK…
GO:BP	positive regulation of cell migration	GO:0030335	0.000124739	3.904	351	4434	147	15439	KITLG,CXCL10,CLDN1,ANO6,IGF1,CLEC7A,LEF1,FGF7,TNFSF18,PIK3R1,RIPOR2,ONECUT2,KIF20B,HGF,APC,MCU,ETS1,DOCK7,SP1,TIAM1,WNT5B,ATP8A1,PLAA,NR4A3,HIF1A,SEMA6D,IGFBP5,THBS1,LYN,AGO2,RRAS2,AMOTL1,ACTG1,ENSCHIG00000019133,TGFBR2,FN1,MET,RHOJ,SNAI2,FOXP1,PLAU,CSF1,DOCK8,LAMC2,NEDD9,PDGFA,MAPK3,MAPK1,ENSCHIG00000026624,SASH1,CAMK1D,NRP1,PIK3C2A,GPLD1,MGAT5,SOX9,SPAG9,ENSCHIG00000017892,EGFR,DDR2,SEMA3A,DOCK…
GO:BP	biological adhesion	GO:0022610	0.000128376	3.89152	885	4434	325	15439	CD36,KITLG,CLDN1,ADIPOQ,CXCR4,IGF1,NUAK1,NDNF,LEF1,NT5E,CDH24,SOCS5,ITCH,TGM2,ATP1B1,TNFSF18,SLC7A11,PIK3R1,ADAMTS12,MAGI1,RIPOR2,ONECUT2,PRKG1,DDR1,PPARD,DSG2,ETS1,GLMN,BRAF,PPP1R12A,TIAM1,PCDH7,RGMB,CYFIP2,GCNT1,NR4A3,TLN2,TYRO3,THBS1,MERTK,CYP1B1,PCDH8,LYN,RC3H1,ENSCHIG00000006308,PTPN11,TMEM131L,ACTG1,CRK,FRMD5,TGFBR2,DLG1,FN1,AMIGO1,SNAI2,LYVE1,AXL,CX3CR1,GPAM,PLAU,HHLA2,CSF1,COL6A3,LMLN,RAS…
GO:BP	regulation of catalytic activity	GO:0050790	0.000129053	3.88923	1502	4434	521	15439	KITLG,ADIPOQ,EPHA4,IQGAP3,ECM1,ANP32E,PSRC1,DHCR24,POT1,IGF1,NUAK1,KLRK1,CLEC7A,LEF1,LAMTOR3,RAP1GDS1,ARAP2,ARHGAP24,TNFAIP8,GM2A,ARRDC3,PPP2R5E,SOCS5,ENSCHIG00000024446,PKIA,GPATCH2,CNST,ATP1B1,PDGFC,RFC5,RAP1GAP2,MYOCD,CARTPT,GZMA,MTRR,PRKG1,GPR137B,HGF,PAQR3,RFK,APC,ADRA2B,TMEM64,RASAL2,SFRP2,LCP2,SNX18,PRLR,CACUL1,MARF1,CHP2,RAB11FIP2,IKBKB,DUSP4,RIN1,ITSN1,DOCK7,ARHGAP29,F3,ENSCHIG0000002380…
GO:BP	kidney development	GO:0001822	0.000132008	3.8794	214	4434	98	15439	ADIPOQ,EPHA4,GREB1L,TRAF3IP1,LZTS2,GCNT1,RRM2B,YAP1,NPHS2,SALL1,DLG1,PKD2,PCSK5,BDNF,RARB,SMAD4,PDGFA,NOTCH2,ENSCHIG00000026624,FRAS1,PAX8,AP1B1,SOX9,PDGFRA,SMAD5,RDH10,PECAM1,ADAMTS6,ARID5B,NPNT,ADAMTS1,SMAD3,PROX1,FOXC1,SOX4,HES1,C1GALT1,PROM1,PTCH1,PYGO1,EPCAM,EYA1,ZBTB16,KIF26B,FAT4,CTNNB1,EPHA7,FGFR1,TGFBR1,NUP160,FOXC2,GDNF,PYGO2,ITGA3,NUP133,WDPCP,UMOD,BICC1,LRRK2,ZMPSTE24,MEF2C,SIX4,BMP10…
GO:BP	positive regulation of cell motility	GO:2000147	0.000138948	3.85715	363	4434	151	15439	KITLG,CXCL10,CLDN1,ANO6,IGF1,CLEC7A,LEF1,FGF7,TNFSF18,PIK3R1,RIPOR2,ONECUT2,KIF20B,HGF,APC,MCU,ETS1,DOCK7,SP1,TIAM1,WNT5B,ATP8A1,PLAA,NR4A3,HIF1A,SEMA6D,IGFBP5,THBS1,LYN,AGO2,RRAS2,AMOTL1,ACTG1,ENSCHIG00000019133,TGFBR2,FN1,MET,RHOJ,SNAI2,FOXP1,PLAU,CSF1,DOCK8,LAMC2,NEDD9,PDGFA,MAPK3,MAPK1,ENSCHIG00000026624,SASH1,CAMK1D,NRP1,PIK3C2A,GPLD1,MGAT5,SOX9,SPAG9,ENSCHIG00000017892,EGFR,DDR2,SEMA3A,DOCK…
GO:BP	negative regulation of apoptotic process	GO:0043066	0.000143071	3.84445	563	4434	219	15439	KITLG,RHBDD1,DHCR24,FIGNL1,IGF1,NDNF,LEF1,TNFAIP8,ATG5,ITCH,ADNP,MYOCD,PIK3R1,MITF,TMEM14A,RRN3,DDIAS,HGF,SFRP2,PRLR,ACKR3,ITSN1,BRAF,APBB2,GABRB2,PHIP,HIF1A,TYRO3,THBS1,MERTK,BIRC6,NAA16,MTDH,RRM2B,ENSCHIG00000021932,CBL,YAP1,DYRK3,PPT1,CHST11,BCL2L2,SNAI2,BDNF,HIPK3,API5,AXL,FOXP1,GCLC,GPAM,RARB,RASA1,DOCK8,RTKN2,KRAS,CTNNA1,CAAP1,CAMK1D,HSPD1,NR4A2,SOX9,EGFR,SON,OPA1,BCL6,PIK3CA,NEUROD1,HTR2B,…
GO:BP	regulation of cell migration	GO:0030334	0.000143436	3.84334	605	4434	233	15439	KITLG,CXCL10,CLDN1,ADIPOQ,ECM1,MEOX2,ANO6,IGF1,KLRK1,CLEC7A,LEF1,GJA1,FGF7,TNFSF18,MYOCD,PIK3R1,MITF,RIPOR2,ONECUT2,PRKG1,KIF20B,HGF,GNRH1,APC,SFRP2,RABGEF1,MCU,ETS1,DOCK7,BRAF,SP1,TIAM1,WNT5B,ATP8A1,PLAA,RECK,NR4A3,HIF1A,SEMA6D,IGFBP5,THBS1,CYP1B1,CLIC4,DACH1,LYN,AGO2,RRAS2,AMOTL1,ACTG1,CRK,ENSCHIG00000019133,FRMD5,DAG1,TGFBR2,FN1,MET,RHOJ,SNAI2,FOXP1,ABHD6,PLAU,CSF1,DOCK8,PTPRJ,LAMC2,NEDD9,PDGF…
GO:BP	regulation of growth	GO:0040008	0.000145175	3.83811	395	4434	162	15439	PSRC1,IGF1,LEF1,SOCS5,SPART,MYOCD,DCUN1D3,SFRP2,DDR1,PPARD,EPB41L3,SYT1,DUSP6,RBPJ,APBB2,PLAA,HIF1A,IGFBP5,RIMS1,DNAJB2,YAP1,TMC8,ENSCHIG00000019133,TGFBR2,FN1,PPT1,GHRHR,BDNF,MINAR1,FOXP1,IP6K2,GPAM,CSF1,PTPRJ,TNKS2,NEDD4L,SMAD4,NOTCH2,RERG,PTPRS,NCBP1,ENPP1,CDA,STK3,IHH,SPHK2,RAI1,EGFR,TKT,N6AMT1,DCBLD2,BCL6,MAP3K13,PIK3CA,CREB1,MAP2,ST7L,SEMA3A,ING3,SOCS2,NPY1R,PLAC8,WDR36,SRF,SYT4,SMAD3,PROX1…
GO:BP	positive regulation of transport	GO:0051050	0.000162797	3.78835	525	4434	206	15439	CXCL10,ADIPOQ,KHDRBS1,ANO6,IGF1,CLEC7A,ATG5,HOMER1,CACNB2,SLC1A2,CNST,ATP1B1,CLIP3,CARTPT,PIK3R1,RAB27B,KIF20B,CFTR,CD2AP,VPS4B,CHP2,MCU,RAB3B,SCP2,GLMN,RAB21,SYT1,CPSF6,C2CD5,ATF4,ATP8A1,PLAA,NR4A3,FYN,HIF1A,MERTK,RHOQ,XPO4,UBR5,ACSL3,CBL,PTPN11,TRPC3,ENSCHIG00000010440,ICE1,NFKBIA,AZIN1,DLG1,AMIGO1,PPT1,GHRHR,PKD2,TMEM30B,AXL,CD19,CEP290,AP1G1,CASK,EDEM1,TNFRSF11A,SMAD4,TCF7L2,SYT7,FRMD8,ATP13A…
GO:BP	gene expression	GO:0010467	0.000167646	3.77561	4524	4434	1434	15439	RIDA,ADIPOQ,EPC2,IKZF2,RHBDD1,KHDRBS1,IQGAP3,SYT11,PGLYRP3,ECM1,PSRC1,DR1,NFIA,DHCR24,TUT4,LURAP1,MEOX2,TWISTNB,HBP1,YAE1,PRICKLE1,CNOT2,USP15,IGF1,YARS2,KLRK1,CLEC7A,BBS7,LEF1,TRMT10A,KLF3,NR3C1,G3BP1,SLU7,ZBTB5,EBF2,IARS1,ENSCHIG00000010087,NCOA7,GJA1,ENSCHIG00000017313,ATG5,TBPL1,BCLAF1,MTRF1L,TTC5,ICE2,FGF7,PAIP2B,SOCS5,ENSCHIG00000018361,ENSCHIG00000027081,EPC1,ITCH,NCOA2,HEY1,ABRA,ESRP1,RRP…
GO:BP	regulation of transmembrane receptor protein serine/threonine kinase signaling pathway	GO:0090092	0.000199528	3.7	183	4434	86	15439	ASPN,SPART,MYOCD,BMP5,ONECUT2,SFRP2,ENSCHIG00000008899,RBPJ,CD109,THBS1,PRDM16,GLG1,CHST11,RNF111,CAV2,SMAD4,TWSG1,TGFB1I1,SNX25,NOTCH2,SPTBN1,PMEPA1,SORL1,TRIM33,LOX,NPNT,VEPH1,SMAD3,ING2,CDKN1C,HES1,LEMD3,EP300,CTDSPL2,FBN1,LTBP1,SPRED2,ZEB1,BAMBI,KIAA0319,ZNF423,NUP93,TOB1,CIDEA,ZBTB7A,TGFBR1,ITGA3,CDH5,ZNF451,ACVR1B,DMRT1,BMP10,ADAM17,TP53,DAB2,BMPR2,IL17RD,HFE,PDPK1,SFRP1,ZNF703,PBLD,WWTR1,F…
GO:BP	intracellular protein transport	GO:0006886	0.000232421	3.63373	563	4434	218	15439	ADIPOQ,MAIP1,RHBDD1,STX12,PRICKLE1,SLU7,STX17,XPO7,GCC2,ABRA,YOD1,ENSCHIG00000023339,PIK3R1,NUP155,KIF20B,VTI1A,APPBP2,RABGEF1,CHP2,TOMM20,SVIP,MDFIC,C2CD5,TMEM129,PURA,SEC24A,FYN,UBE2J1,STYX,RAB8B,ENSCHIG00000023777,XPO4,PAN3,KPNA3,NAPB,UBR5,RIMS1,IPO7,PTPN11,TLK1,ENSCHIG00000010440,TNPO1,ICE1,IWS1,ENSCHIG00000017907,NFKBIA,SEC62,STAM2,UHMK1,POLDIP3,SRP72,TNPO2,AP3D1,TMEM30B,ARFIP1,CLTC,TIMM22,R…
GO:BP	positive regulation of phosphorylation	GO:0042327	0.000248032	3.60549	663	4434	251	15439	KITLG,ADIPOQ,EPHA4,IQGAP3,PSRC1,IGF1,LAMTOR3,SLC4A4,FGF7,TNFSF18,PDGFC,CLIP3,CARTPT,BMP5,HGF,ADRA2B,SFRP2,LCP2,PRLR,CACUL1,GAREM1,ACKR3,ITSN1,DOCK7,GLMN,PRKAG2,BRAF,MDFIC,PJA2,VLDLR,FYN,GRM1,THBS1,ABI1,LYN,PTPN11,MMD,ERN1,TGFBR2,RAP1B,DLG1,PKD2,TEC,BDNF,STRADA,CD19,CSF1,CAV2,NEDD9,TNFRSF11A,SMAD4,TWSG1,PDGFA,MAPK3,ERCC6,MAPK1,NOTCH2,FRS2,KRAS,RAP2B,LPAR1,ENSCHIG00000015151,SASH1,AJUBA,CDK9,NRP1,S…
GO:BP	organelle assembly	GO:0070925	0.000271082	3.5669	540	4434	210	15439	ARL13B,STX12,ELAPOR1,CEP41,CNOT2,BBS7,G3BP1,STX17,ATG5,TBPL1,PIP4K2A,TMEM41B,ONECUT2,KIF11,TMEM107,UBAP2L,VPS4B,CEP76,TRAF3IP1,SBDS,TMEM159,LZTS2,FNBP1L,BBS10,TTLL8,CDS1,CEP70,TXNDC15,STAG1,C9ORF72,KAT2B,FEZ2,PAN3,DDX6,RC3H1,MAP9,ARHGAP35,ACTG1,PAFAH1B1,SEC22B,RFX3,UBQLN1,MNS1,RAB39A,CENPH,FOXP1,HAUS1,CEP290,KIF24,PIKFYVE,SMAD4,CCSAP,SYT7,CDKL5,STAG2,SSX2IP,MFSD14A,WDR1,PTPRS,PUM2,PARVA,RO60,HNRN…
GO:BP	regulation of cell cycle	GO:0051726	0.000271637	3.56601	691	4434	260	15439	PSRC1,FIGNL1,IGF1,CCNG2,RRP8,TRIM21,AHCTF1,MYOCD,DCUN1D3,KIF20B,KIF11,WAPL,APC,ANGEL2,VPS4B,CEP76,SFPQ,APBB2,KAT2B,HECA,THBS1,MEIS2,BIRC6,NACC2,DACH1,WAC,RAD21,DYRK3,PTPN11,MAP9,RBL2,MEIOC,ERN1,ERCC3,DLG1,ATF2,UHMK1,PKD2,TRIM36,E2F5,DTL,ENSCHIG00000015230,CAV2,ZFP36L1,TCF7L2,ERCC6,CCSAP,NOTCH2,KMT2E,CDK6,CCNL1,EIF4E,PTPRK,CDK9,CABLES2,HNRNPU,SOX9,GIT1,CTDSPL,EGFR,CCNT1,SON,CHMP2B,ECT2,MLF1,NEUROD…
GO:BP	regulation of secretion	GO:0051046	0.000286274	3.54322	416	4434	168	15439	OPRK1,RAPGEF4,SYT11,IGF1,SLC9B2,GJA1,ATG5,CRHBP,CACNB2,CARTPT,RAB27B,CFTR,CD2AP,VPS4B,RABGEF1,MCU,RAB3B,GLMN,BRAF,RAB21,SYT1,HIF1A,NAPB,LYN,ACSL3,KDM5B,PTPN11,ENSCHIG00000010440,FBXL20,RAP1B,FN1,GHRHR,RFX3,ARFIP1,GPAM,AP1G1,CASK,TNFRSF11A,SMAD4,TCF7L2,SYT7,FRMD8,ATP13A2,SRI,SLC4A8,CPLX2,PAX8,FRMD4A,SORL1,SPHK2,CD200,ENSCHIG00000013367,KLF7,CREB1,HTR2B,HAVCR2,RIC1,ANXA1,HTR1B,VSNL1,STAM,ATP2A2,SYT…
GO:BP	covalent chromatin modification	GO:0016569	0.000294675	3.53066	358	4434	148	15439	DR1,USP15,LEF1,ATG5,EPC1,MYOCD,RNF40,MIER1,RYBP,NAA50,BRPF3,SFPQ,KMT5B,PCGF3,KDM4B,PHF2,SATB1,KAT2B,PAX7,WAC,ASXL1,UBR5,PRDM16,ENSCHIG00000011390,KDM5B,SETD6,IWS1,ATF2,PPHLN1,PWP1,DNMT3A,SETDB2,NSD3,ENSCHIG00000007799,CBX8,JARID2,UBR2,SMAD4,MAPK3,ASH2L,JADE3,KMT2E,NSD1,AKAP8,CDK9,SPHK2,N6AMT1,BCL6,ING3,MAP3K12,UFL1,JADE1,DMRTC2,TASOR,PRMT8,NCOA1,ELK4,EZH1,PRKCB,KDM2A,USP49,KDM1B,PCGF5,ING2,RBM14,…
GO:BP	response to organic cyclic compound	GO:0014070	0.000301205	3.52114	390	4434	159	15439	CNOT2,ABCC9,LEF1,NR3C1,CRHBP,HOMER1,NCOA2,SLC7A11,PDE12,LCOR,CFTR,KLF9,GNRH1,HCN1,COLEC12,LMO3,CASP6,LARP1,IGFBP5,CYP1B1,UBR5,CYP7B1,YAP1,SSH1,TRPC3,CREBRF,UBE3A,NFKBIA,TGFBR2,RAP1B,GHRHR,PKD2,SNAI2,FOXP1,CAV2,ZFP36L1,MAPK3,AQP8,MAPK1,EIF4E,CTNNA1,UBA5,ALPL,TRPA1,HNRNPU,GPLD1,ENSCHIG00000026818,OSBPL7,DDX5,AKAP13,EGFR,TP63,RFTN2,HTR2B,SOCS2,RBFOX2,SMAD5,STING1,ANXA1,HTR1B,UFL1,DNAAF4,PELI1,HNF4G,…
GO:BP	cognition	GO:0050890	0.000363629	3.43934	185	4434	86	15439	SYT11,GM2A,GRIA1,SLC7A11,ATXN1L,HLA-DRA,SHANK2,RIN1,LHX8,BRAF,ATP8A1,HIF1A,GMFB,MEIS2,YTHDF1,PAFAH1B1,PPT1,UBA6,SNAP25,BDNF,PICALM,KRAS,TMOD2,SLC8A2,TANC1,CHMP2B,CREB1,LDLR,CHL1,SRF,SLC6A1,GPR88,EP300,APP,NTRK2,HMGCR,RCAN1,ITGB1,SHANK1,NF1,GPR155,NIPBL,CHRNA7,PTPRZ1,ENSCHIG00000025136,FAM107A,SOBP,NPTX2,GRM5,NDRG4,ITGA3,PTN,GRIN2A,TBR1,CYFIP1,ATP1A2,ELAVL4,MEF2C,CALB1,IFT20,TACO1,LINS1,SYNGAP1,CA…
GO:BP	chromosome organization	GO:0051276	0.000371803	3.42969	816	4434	300	15439	CCT8,ANP32E,PSRC1,DR1,POT1,USP15,LEF1,NCAPG,NR3C1,ATG5,ENSCHIG00000027081,EPC1,RRP8,RFC5,ENSCHIG00000021323,CHD9,MYOCD,MBTD1,UBN1,RNF40,WAPL,SPTY2D1,TSPYL5,MIER1,APC,H1-6,SMCHD1,ACTR8,RYBP,H1-3,NAA50,BRPF3,VPS4B,ESCO1,SEH1L,SMG1,MEIOB,SFPQ,KMT5B,GATAD1,PDS5A,PCGF3,PURA,KDM4B,PHF2,SATB1,KAT2B,ARID1B,PAX7,NCAPH,ENSCHIG00000023777,PDS5B,WAC,ASXL1,UBR5,RAD21,MCM4,PRDM16,ENSCHIG00000011390,KDM5B,SETD6…
GO:BP	learning or memory	GO:0007611	0.000408982	3.3883	156	4434	75	15439	SYT11,GM2A,GRIA1,SLC7A11,ATXN1L,SHANK2,RIN1,LHX8,BRAF,ATP8A1,HIF1A,GMFB,MEIS2,YTHDF1,PAFAH1B1,PPT1,UBA6,SNAP25,BDNF,PICALM,KRAS,TMOD2,SLC8A2,TANC1,CREB1,LDLR,SRF,SLC6A1,GPR88,EP300,APP,NTRK2,HMGCR,RCAN1,ITGB1,SHANK1,PTPRZ1,ENSCHIG00000025136,NPTX2,GRM5,NDRG4,ITGA3,PTN,GRIN2A,TBR1,ATP1A2,ELAVL4,MEF2C,CALB1,IFT20,TACO1,SYNGAP1,CAMK4,CRTC1,BRINP1,EPM2A,ENSCHIG00000017357,SCN2A,MAPT,PSEN1,EIF4EBP2,PA…
GO:BP	cellular response to lipid	GO:0071396	0.000457518	3.33959	297	4434	126	15439	CXCL10,TUT4,CNOT2,KLRK1,LEF1,NR3C1,CRHBP,LCOR,CFTR,KLF9,PTAFR,LMO3,PLAA,MTDH,UBR5,CYP7B1,LYN,YAP1,CREBRF,UBE3A,NFKBIA,PDE4B,GHRHR,SNAI2,AXL,FOXP1,ZFP36L1,MAPK3,MAPK1,EIF4E,UBA5,AKAP8,SASH1,HNRNPU,GPLD1,SPHK2,SOX9,OSBPL7,DDX5,AKAP13,EGFR,PID1,EPHA3,TP63,CREB1,RBFOX2,CXCL8,LDLR,HAVCR2,ANXA1,ABCA1,UFL1,DNAAF4,HNF4G,CASP9,ANKRD1,LANCL2,PRKAA2,ADCY5,GFI1,TRIM24,HOXA2,EP300,EPHA5,EFNA5,PPARGC1B,PTCH1,L…
GO:BP	embryonic morphogenesis	GO:0048598	0.000470795	3.32717	457	4434	181	15439	ARL13B,ADIPOQ,COL11A1,PRICKLE1,LEF1,GJA1,RIPOR2,KIF20B,SFRP2,TMEM107,FOXF2,TRAF3IP1,GLMN,HIPK1,CACNA1C,RECK,HIF1A,AFF3,PCDH8,YAP1,SALL1,ARHGAP35,DAG1,TGFBR2,DLG1,FN1,CHST11,PKD2,RSPO3,RARB,ZFP36L1,SP9,SMAD4,TWSG1,TGFB1I1,MAPK3,HMX2,MAPK1,NOTCH2,HOXA3,FRS2,FRAS1,SOS1,TGIF2,STK3,IHH,ZNF281,SATB2,TCTN1,ZEB2,VASP,SOX9,COL8A1,TP63,NEUROD1,PRKRA,LNPK,MAP3K20,HTR2B,ENSCHIG00000022600,PDGFRA,OTOP1,FLRT3,…
GO:BP	cellular response to chemical stress	GO:0062197	0.000481198	3.31768	205	4434	93	15439	NCOA7,ATG5,SLC7A11,HGF,SFPQ,SLC25A24,ARNT,ATF4,LETM1,ENSCHIG00000018293,HIF1A,GCH1,CYP1B1,MET,PKD2,UBQLN1,NET1,ZFP36L1,MAPK3,PLEKHA1,MAPK1,ATP13A2,LRRC8E,PTPRK,NR4A2,EGFR,ECT2,PRKRA,PDGFRA,FANCC,MAP3K5,TP53INP1,ATP2A2,SMPD3,ARL6IP5,PRDX3,FER,VKORC1L1,CHUK,STOX1,PRKAA2,PPARGC1B,MAPK9,SLC1A1,SOD2,SETX,FOXO1,SRC,PTGS2,DIABLO,STX2,SIRT2,STK39,PDK1,CTNNB1,PRKCD,RBM11,MAPK13,PAWR,FANCD2,LRRK2,PLA2R1,LA…
GO:BP	synaptic vesicle cycle	GO:0099504	0.000512318	3.29046	100	4434	53	15439	RAPGEF4,CACNB2,ITSN1,RAB3B,BRAF,SYT1,PLAA,STON2,NAPB,ENSCHIG00000010440,FBXL20,RAP1B,DNAJC6,SNAP25,PLD1,CASK,SYT7,SYP,SLC4A8,ENSCHIG00000015151,CPLX2,PCDH17,ENSCHIG00000013367,ATP2A2,FCHO2,RAP1A,PRKCB,CDH2,CNR1,DNM3,CTNNB1,CADPS2,ENSCHIG00000021578,STX1B,ENSCHIG00000022037,STXBP5L,LRRK2,STX3,CANX,CAMK2A,SLC17A6,PPP3CB,STXBP1,DOC2B,CACNA1D,SNAPIN,PSEN1,APBA1,SYNJ1,ADCY1,SH3GL1,CACNA1A,GIPC1
GO:BP	regulation of secretion by cell	GO:1903530	0.000519378	3.28452	387	4434	157	15439	RAPGEF4,SYT11,IGF1,SLC9B2,GJA1,CRHBP,CACNB2,CARTPT,RAB27B,CFTR,CD2AP,VPS4B,RABGEF1,MCU,RAB3B,GLMN,BRAF,RAB21,SYT1,HIF1A,NAPB,LYN,KDM5B,PTPN11,ENSCHIG00000010440,FBXL20,RAP1B,FN1,GHRHR,RFX3,ARFIP1,GPAM,AP1G1,CASK,TNFRSF11A,SMAD4,TCF7L2,SYT7,FRMD8,ATP13A2,SRI,SLC4A8,CPLX2,PAX8,FRMD4A,SORL1,SPHK2,CD200,ENSCHIG00000013367,KLF7,CREB1,HTR2B,HAVCR2,RIC1,ANXA1,HTR1B,VSNL1,STAM,ATP2A2,SYT4,ANKRD1,RAP1A,GP…
GO:BP	organonitrogen compound catabolic process	GO:1901565	0.000546849	3.26213	819	4434	300	15439	RIDA,TTC3,EPHA4,RHBDD1,PGLYRP3,PRICKLE1,USP15,BBS7,GM2A,AFG1L,NT5E,UBR1,SOCS5,ITCH,YOD1,ENC1,GZMA,ADAMTS12,MTRR,ENSCHIG00000015705,HOGA1,TRIM25,CAMLG,APC,UBR3,PIPOX,CACUL1,RYBP,FOXF2,VPS4B,RNF125,FBXL19,RNF216,ATE1,IDE,VPS37A,SVIP,USP1,GLMN,TMEM129,CTSB,PLAA,VPS13A,USP25,FYN,SNX3,UBE2J1,STYX,DMGDH,USP34,PCYOX1,NUDT15,WAC,CBL,PLEKHG5,EDEM3,UBE3A,AZIN1,SEC22B,DDAH1,ENSCHIG00000016989,PDE4B,PPT1,UBA…
GO:BP	behavior	GO:0007610	0.000572432	3.24228	408	4434	164	15439	OPRK1,EPHA4,SYT11,GM2A,GRIA1,ARRDC3,CRHBP,HOMER1,NCOA2,SLC1A2,SLC7A11,ATXN1L,CHRNB1,CARTPT,INPP5F,UBR3,LYPD1,SHANK2,RIN1,LHX8,NHLH2,BRAF,EPS8,ATP8A1,VPS13A,GRM1,HIF1A,GMFB,MEIS2,DACH1,YTHDF1,PENK,GLRB,PAFAH1B1,GAD1,FBXL20,CREBRF,PPT1,UBA6,MEIS1,SNAP25,BDNF,PER3,FOXP1,THRB,PICALM,KRAS,EIF4E,MRAP2,TMOD2,GPR176,PCDH17,PREX2,ARCN1,SEZ6L,SLC8A2,NR4A2,TANC1,SLC4A10,ENSCHIG00000013367,CREB1,HTR2B,NPY1R,…
GO:BP	positive regulation of cell development	GO:0010720	0.000684281	3.16477	316	4434	132	15439	ADIPOQ,IGF1,CLEC7A,NDNF,SLC9B2,RETREG3,BMP5,KIF20B,ADRA2B,BRAF,RAB21,SYT1,JADE2,PLAA,VLDLR,FYN,HIF1A,NIN,LYN,RIMS1,ARHGAP35,MMD,CRK,PAFAH1B1,FN1,RFX3,STMN2,BDNF,BEND6,CSF1,NEDD9,NEDD4L,ENSCHIG00000015151,CAMK1D,NRP1,SS18L1,TGIF2,PREX1,CAPRIN1,ZEB2,SPAG9,ENSCHIG00000017892,EPHA3,BCL6,MAP3K13,ECT2,NEUROD1,SEMA3A,SOCS2,ASCL1,UFL1,PAX6,SRF,SYT4,RAP1A,NCOA1,PROX1,SHTN1,RREB1,LIMK1,CDON,HES1,CAPRIN2,EP…
GO:BP	MAPK cascade	GO:0000165	0.000706035	3.15117	507	4434	197	15439	KITLG,ADIPOQ,EPHA4,IQGAP3,IGF1,LAMTOR3,MAPK10,HACD3,ITCH,CARTPT,HGF,PAQR3,ADRA2B,SFRP2,GAREM1,ACKR3,DUSP4,BRAF,MDFIC,DUSP6,LMO3,PJA2,GRM1,STYX,THBS1,LYN,PTPN11,PAFAH1B1,ERN1,DAG1,RAP1B,DLG1,FN1,HIPK3,CAV2,ZFP36L1,PTPRJ,TNFRSF11A,SMAD4,PDGFA,MAPK3,ERCC6,MAPK1,NOTCH2,FRS2,TIMP3,LPAR1,SASH1,AJUBA,STK3,SORL1,SH2B3,ZEB2,SOX9,SPAG9,AKAP13,EGFR,MAP3K13,MAP3K20,HTR2B,GADD45A,MAP3K12,PTPRR,PDGFRA,KDR,HAVC…
GO:BP	signal transduction by protein phosphorylation	GO:0023014	0.00070705	3.15055	510	4434	198	15439	KITLG,ADIPOQ,EPHA4,IQGAP3,IGF1,LAMTOR3,MAPK10,HACD3,ITCH,CARTPT,HGF,PAQR3,ADRA2B,SFRP2,GAREM1,ACKR3,DUSP4,BRAF,MDFIC,DUSP6,LMO3,PJA2,GRM1,STYX,THBS1,LYN,PTPN11,PAFAH1B1,ERN1,DAG1,RAP1B,DLG1,FN1,HIPK3,CAV2,ZFP36L1,PTPRJ,TNFRSF11A,SMAD4,PDGFA,MAPK3,ERCC6,MAPK1,NOTCH2,FRS2,TIMP3,LPAR1,SASH1,AJUBA,STK3,SORL1,SH2B3,ZEB2,SOX9,SPAG9,AKAP13,EGFR,MAP3K13,MAP3K20,HTR2B,GADD45A,MAP3K12,PTPRR,PDGFRA,KDR,HAVC…
GO:BP	response to peptide	GO:1901652	0.00072289	3.14093	212	4434	95	15439	ADIPOQ,EPHA4,IGF1,CRHBP,PIK3R1,APC,GLP1R,CACNA2D1,C2CD5,PHIP,FYN,KAT2B,IGFBP5,RHOQ,TBC1D4,PTPN11,ENSCHIG00000010440,NFKBIA,GHRHR,CAV2,ZFP36L1,CPEB1,TRIM72,TGFBR3,ENPP1,SNX5,SORL1,GPLD1,NR4A2,PID1,CREB1,RPE65,SOCS2,OTOP1,SLC39A14,SMPD3,ERBIN,FER,RAB31,OSBPL8,USO1,EGR1,APP,NCK1,DENND4C,KL,SRC,PTPN1,SESN3,INHBB,NDEL1,PRKCD,ICAM1,EPM2AIP1,GRM5,LEP,APPL2,CACNA1B,FOXC2,IGF1R,BAIAP2L1,SORT1,INSR,HDAC9,A…
GO:BP	sensory organ development	GO:0007423	0.000724733	3.13982	424	4434	169	15439	EPHA4,LEF1,ATG5,MITF,RIPOR2,SMCHD1,DDR1,FOXF2,TRAF3IP1,HIPK1,CACNA1C,ATF4,RBPJ,GABRB2,BNC2,HIF1A,MEIS2,MERTK,CYP1B1,CLIC4,PRDM16,PTPN11,ARHGAP35,PAFAH1B1,TGFBR2,DLG1,PLPPR4,RHOJ,MEIS1,MAB21L1,BDNF,TRIP11,RARB,THRB,BMPR1B,TWSG1,MAPK3,HMX2,CABP4,MAPK1,GNAT2,NOTCH2,ENSCHIG00000026624,FRS2,SOS1,PAX8,VSX1,TGIF2,IHH,ZEB2,GPD2,SOX9,COL8A1,NEUROD1,PRKRA,RPE65,ASCL1,PDGFRA,OTOP1,CXCL14,RDH10,PAX6,CRB1,SRF…
GO:BP	positive regulation of protein phosphorylation	GO:0001934	0.000739727	3.13093	631	4434	238	15439	KITLG,ADIPOQ,EPHA4,IQGAP3,PSRC1,IGF1,LAMTOR3,FGF7,TNFSF18,PDGFC,CLIP3,CARTPT,BMP5,HGF,ADRA2B,SFRP2,LCP2,PRLR,CACUL1,GAREM1,ACKR3,DOCK7,PRKAG2,BRAF,MDFIC,PJA2,VLDLR,FYN,GRM1,THBS1,ABI1,LYN,PTPN11,MMD,ERN1,TGFBR2,RAP1B,DLG1,PKD2,TEC,BDNF,STRADA,CSF1,CAV2,NEDD9,TNFRSF11A,SMAD4,TWSG1,PDGFA,MAPK3,ERCC6,MAPK1,NOTCH2,FRS2,KRAS,RAP2B,LPAR1,ENSCHIG00000015151,SASH1,AJUBA,CDK9,NRP1,STK3,ZEB2,SLC8A2,SOX9,UN…
GO:BP	hematopoietic or lymphoid organ development	GO:0048534	0.000748396	3.12587	625	4434	236	15439	KITLG,RABL3,ADIPOQ,CLDN18,PGLYRP3,LEF1,SLC9B2,ATG5,SOCS5,PIP4K2A,ATXN1L,PIK3R1,MITF,TMEM64,SFRP2,SBDS,POLB,ETS1,BRAF,ATF4,RBPJ,CD109,SATB1,HIF1A,STON2,TYRO3,MEIS2,MERTK,ABI1,KLF10,LYN,DYRK3,RC3H1,PTPN11,TMEM131L,PAFAH1B1,IREB2,JAG2,NFKBIA,TGFBR2,RBM47,MEIS1,AXL,AZI2,SLC25A38,FOXP1,CD19,CSF1,ZFP36L1,RTKN2,JARID2,TNFRSF11A,TWSG1,MAPK3,SH3PXD2A,PICALM,FLI1,MAPK1,TFE3,NOTCH2,PIAS3,HOXA3,KMT2E,CDK6,IT…
GO:BP	positive regulation of catalytic activity	GO:0043085	0.000756211	3.12136	865	4434	314	15439	KITLG,ADIPOQ,EPHA4,IQGAP3,PSRC1,POT1,IGF1,CLEC7A,LAMTOR3,RAP1GDS1,ARAP2,ARHGAP24,GM2A,ARRDC3,ATP1B1,PDGFC,RFC5,RAP1GAP2,CARTPT,HGF,RFK,ADRA2B,RASAL2,SFRP2,LCP2,SNX18,PRLR,CACUL1,CHP2,RAB11FIP2,RIN1,ITSN1,DOCK7,ARHGAP29,F3,PRKAG2,MDFIC,PPP1R12A,TIAM1,CYFIP2,TBC1D9B,PLAA,VLDLR,GRM1,GCH1,APH1B,THBS1,ASAP2,TBC1D4,ABI1,ASPH,LYN,DNAJB2,DENND1B,PTPN11,ARHGAP35,MMD,CRK,RABEP1,ERN1,CCDC125,TGFBR2,AZIN1,DL…
GO:BP	response to lipid	GO:0033993	0.00078852	3.10319	398	4434	160	15439	CXCL10,GDAP2,TUT4,CNOT2,KLRK1,LEF1,NR3C1,CRHBP,NCOA2,LCOR,CFTR,KLF9,GNRH1,PTAFR,VPS4B,LMO3,PLAA,ENSCHIG00000018293,GCH1,MTDH,UBR5,CYP7B1,LYN,YAP1,CREBRF,UBE3A,NFKBIA,TGFBR2,PDE4B,GHRHR,SNAI2,AXL,FOXP1,ZFP36L1,TNFRSF11A,MAPK3,MAPK1,TGFBR3,EIF4E,UBA5,AKAP8,SASH1,ALPL,GDAP1,HNRNPU,GPLD1,SPHK2,SOX9,OSBPL7,DDX5,AKAP13,EGFR,PID1,EPHA3,TP63,CREB1,SOCS2,RBFOX2,ASCL1,CXCL8,LDLR,HAVCR2,ANXA1,ABCA1,UFL1,DNA…
GO:BP	positive regulation of cell projection organization	GO:0031346	0.000827174	3.0824	207	4434	93	15439	NDNF,RETREG3,BMP5,RIPOR2,APC,FNBP1L,BRAF,RAB21,SYT1,PLAA,VLDLR,FYN,NIN,RHOQ,LYN,RIMS1,ARHGAP35,PAFAH1B1,NCKAP1,FN1,MNS1,STMN2,BDNF,NEDD4L,ENSCHIG00000015151,CAMK1D,NRP1,SS18L1,CAPRIN1,CORO1C,ZEB2,PLEKHM1,EPHA3,MAP3K13,SRF,SYT4,RAP1A,CEP135,CCDC88A,RREB1,LIMK1,ANLN,CAPRIN2,EP300,EFNA5,NCK1,NTRK2,TMEM30A,SETX,SRC,ENPP2,ATMIN,NDEL1,PTK2B,SYT17,FGFR1,SAXO1,TGFBR1,NTRK3,MEGF8,PTN,MACF1,NAV3,CNTN1,RAC2…
GO:BP	histone modification	GO:0016570	0.000867066	3.06195	346	4434	142	15439	DR1,USP15,LEF1,ATG5,EPC1,MYOCD,RNF40,MIER1,RYBP,NAA50,BRPF3,SFPQ,KMT5B,PCGF3,KDM4B,PHF2,SATB1,KAT2B,PAX7,WAC,ASXL1,UBR5,PRDM16,ENSCHIG00000011390,KDM5B,SETD6,IWS1,ATF2,PWP1,SETDB2,NSD3,ENSCHIG00000007799,CBX8,JARID2,UBR2,SMAD4,MAPK3,ASH2L,JADE3,KMT2E,NSD1,AKAP8,CDK9,SPHK2,N6AMT1,BCL6,ING3,MAP3K12,UFL1,JADE1,DMRTC2,PRMT8,NCOA1,ELK4,EZH1,PRKCB,KDM2A,USP49,KDM1B,PCGF5,ING2,RBM14,PRKAA2,GFI1,ASH1L,PA…
GO:BP	negative regulation of protein modification process	GO:0031400	0.000906447	3.04266	443	4434	175	15439	ADIPOQ,NCOA7,ATG5,SOCS5,ITCH,PKIA,TRIM21,MYOCD,INPP5F,HGF,PAQR3,CAMLG,APC,SFRP2,TRAF3IP1,RABGEF1,IKBKB,DUSP4,GLMN,PRKAG2,DUSP6,LMO3,KDM4B,C9ORF72,PLAA,CD109,FYN,KAT2B,UBR5,LYN,PPM1E,PAFAH1B1,DAG1,SAMSN1,DLG1,INKA2,PWP1,HIPK3,MINAR1,PTPRJ,JARID2,SMAD4,SNX25,PIAS3,TIMP3,GNAQ,PHACTR2,ENPP1,PMEPA1,YWHAB,SORL1,CORO1C,SH2B3,MGAT5,SPHK2,CHMP6,TPPP,CTDSPL,PID1,ENSCHIG00000022600,GADD45A,PTPRR,CTDSP2,UFL1…
GO:BP	developmental cell growth	GO:0048588	0.000935231	3.02908	127	4434	63	15439	IGF1,SPART,DDR1,SYT1,CYFIP2,JADE2,C9ORF72,PLAA,NIN,RIMS1,TGFBR2,FN1,BDNF,NEDD4L,MEX3C,PTPRS,ZEB2,SOX9,MAP3K13,MAP2,SEMA3A,WDR36,FLRT3,SRF,SYT4,LIMK1,EFNA5,FSTL4,APP,ITGB1,RAPH1,KIAA0319,NDEL1,CTNNB1,EPHA7,SLIT1,SYT17,IQGAP1,NTRK3,MEGF8,EDN1,CYFIP1,NRP2,MACF1,VCL,BMPR2,LPAR3,SLIT2,RYK,DCLK1,CDH4,POU4F2,MAPT,ARIH2,LLPH,GDF9,PAK6,TNR,SMAD7,IMPACT,SMURF1,SEMA5B,ADRA1A
GO:BP	negative regulation of phosphate metabolic process	GO:0045936	0.00100783	2.99661	417	4434	166	15439	ADIPOQ,SOCS5,ITCH,PKIA,GPATCH2,CNST,MYOCD,PDE12,INPP5F,HGF,PAQR3,APC,SFRP2,TRAF3IP1,RABGEF1,MARF1,IKBKB,DUSP4,PRKAG2,DUSP6,LMO3,C9ORF72,CD109,KAT2B,ARFGEF3,LYN,PPM1E,PAFAH1B1,DAG1,SAMSN1,DLG1,INKA2,PWP1,HIPK3,PTPRJ,SMAD4,PDGFA,SNX25,SLC7A14,TIMP3,GNAQ,PHACTR2,ENPP1,AJUBA,CDA,PMEPA1,YWHAB,SORL1,HNRNPU,PIK3IP1,CORO1C,SH2B3,MGAT5,CHMP6,CTDSPL,PID1,CSRNP3,ENSCHIG00000022600,GADD45A,PTPRR,CTDSP2,PLEK,…
GO:BP	negative regulation of phosphorus metabolic process	GO:0010563	0.00100783	2.99661	417	4434	166	15439	ADIPOQ,SOCS5,ITCH,PKIA,GPATCH2,CNST,MYOCD,PDE12,INPP5F,HGF,PAQR3,APC,SFRP2,TRAF3IP1,RABGEF1,MARF1,IKBKB,DUSP4,PRKAG2,DUSP6,LMO3,C9ORF72,CD109,KAT2B,ARFGEF3,LYN,PPM1E,PAFAH1B1,DAG1,SAMSN1,DLG1,INKA2,PWP1,HIPK3,PTPRJ,SMAD4,PDGFA,SNX25,SLC7A14,TIMP3,GNAQ,PHACTR2,ENPP1,AJUBA,CDA,PMEPA1,YWHAB,SORL1,HNRNPU,PIK3IP1,CORO1C,SH2B3,MGAT5,CHMP6,CTDSPL,PID1,CSRNP3,ENSCHIG00000022600,GADD45A,PTPRR,CTDSP2,PLEK,…
GO:BP	mitotic cell cycle process	GO:1903047	0.00107068	2.97034	441	4434	174	15439	IQGAP3,PSRC1,IGF1,NCAPG,GJA1,DCUN1D3,KIF20B,KIF11,APC,SNX18,CACUL1,NAA50,VPS4B,SEH1L,SBDS,LZTS2,ANK3,REEP3,EPS8,PDS5A,STAG1,ARF1,NCAPH,NACC2,PDS5B,RAD21,NPAT,MAP9,PAFAH1B1,ERCC3,ATF2,PKD2,TRIM36,DTL,CAV2,ZFP36L1,CCSAP,STAG2,KMT2E,E2F7,BACH1,EIF4E,AKAP8,SPTBN1,HNRNPU,CHMP6,UNC119,KPNB1,KIF2A,CTDSPL,EGFR,SON,CHMP2B,ECT2,MAP3K20,NABP1,CDCA8,GNAI1,CTDSP2,INTS13,ANXA1,PCNA,PAX6,JADE1,SMPD3,RAD51C,CNTR…
GO:BP	regulation of cellular protein localization	GO:1903827	0.00107678	2.96787	350	4434	143	15439	CCT8,ADIPOQ,CLDN18,DPP10,SYT11,GCC2,YOD1,CNST,SLC7A11,CLIP3,PIK3R1,RIPOR2,KIF20B,GPR137B,WAPL,APC,LYPD1,ILRUN,CD2AP,CHP2,LZTS2,PPFIA1,SVIP,MDFIC,C2CD5,FYN,UBE2J1,RHOQ,XPO4,UBR5,ACSL3,PTPN11,ENSCHIG00000010440,ICE1,IWS1,DLG1,UHMK1,TMEM30B,RANGRF,CEP290,EDEM1,NEDD4L,TCF7L2,PICALM,ATP13A2,MRAP2,SPTBN1,SORL1,ABCA12,PTPN9,EGFR,PID1,EPHA3,ECT2,MAP2,TOMM7,GNAI1,TCAF1,SH3TC2,KIF5B,NDC80,RAP1A,EPB41L2,CCD…
GO:BP	central nervous system development	GO:0007417	0.00108242	2.9656	582	4434	221	15439	ARL13B,EPHA4,LEF1,SLC1A2,SLC7A11,ATXN1L,PRKG1,SFRP2,HOOK3,LHX8,SCYL2,RBPJ,VLDLR,RECK,FYN,ENSCHIG00000018293,HIF1A,SEMA6D,NIN,TYRO3,PAX7,TRPC4,PTPN11,SALL1,ARHGAP35,CRK,PAFAH1B1,TGFBR2,PPT1,GHRHR,PKD2,UBA6,AXL,FOXP1,EMX2,RARB,TWSG1,MAPK3,HMX2,VSTM5,MAPK1,ENSCHIG00000026624,FRS2,KRAS,PTPRS,SOS1,PAX8,NNAT,STK3,ARCN1,SEZ6L,SATB2,TCTN1,ZEB2,SPHK2,NR4A2,SOX9,B3GNT5,NEUROD1,SLC4A10,PGAP1,CREB1,MAP2,ENSC…
GO:BP	regulation of protein kinase activity	GO:0045859	0.00114334	2.94182	504	4434	195	15439	KITLG,ADIPOQ,EPHA4,IQGAP3,PSRC1,IGF1,LAMTOR3,SOCS5,PKIA,PDGFC,MYOCD,CARTPT,HGF,PAQR3,APC,ADRA2B,SFRP2,LCP2,PRLR,CACUL1,DUSP4,PRKAG2,MDFIC,DUSP6,VLDLR,KAT2B,GRM1,THBS1,ABI1,LYN,PTPN11,MMD,PPM1E,ERN1,TGFBR2,DLG1,INKA2,PKD2,HIPK3,STRADA,CSF1,PTPRJ,NEDD9,TNFRSF11A,PDGFA,MAPK3,ERCC6,MAPK1,FRS2,CCNL1,RAP2B,GNAQ,LPAR1,SASH1,AJUBA,SORL1,CORO1C,SH2B3,ZEB2,SLC8A2,CHMP6,UNC119,SPAG9,ENSCHIG00000017892,EGFR,…
GO:BP	negative regulation of protein phosphorylation	GO:0001933	0.00120313	2.91969	290	4434	122	15439	ADIPOQ,SOCS5,ITCH,PKIA,MYOCD,INPP5F,HGF,PAQR3,APC,SFRP2,TRAF3IP1,RABGEF1,DUSP4,PRKAG2,DUSP6,LMO3,C9ORF72,CD109,KAT2B,LYN,PPM1E,PAFAH1B1,DAG1,SAMSN1,DLG1,INKA2,PWP1,HIPK3,PTPRJ,SMAD4,SNX25,TIMP3,GNAQ,ENPP1,PMEPA1,SORL1,CORO1C,SH2B3,CHMP6,CTDSPL,PID1,ENSCHIG00000022600,GADD45A,PTPRR,CTDSP2,PAX6,RANBP9,PRKRIP1,CDKN1C,ASH1L,C3ORF33,FBLN1,NCK1,LATS1,HMGCR,ATG14,SPRED2,FOXO1,RB1,PTPN1,CYLD,SIRT2,NF1,DN…
GO:BP	cellular response to peptide	GO:1901653	0.00135782	2.86716	176	4434	81	15439	ADIPOQ,EPHA4,IGF1,CRHBP,PIK3R1,APC,GLP1R,CACNA2D1,C2CD5,PHIP,FYN,KAT2B,RHOQ,TBC1D4,PTPN11,ENSCHIG00000010440,GHRHR,CAV2,ZFP36L1,CPEB1,TRIM72,ENPP1,SNX5,SORL1,GPLD1,NR4A2,PID1,RPE65,SOCS2,OTOP1,SLC39A14,SMPD3,FER,RAB31,OSBPL8,USO1,APP,NCK1,DENND4C,KL,SRC,PTPN1,SESN3,INHBB,NDEL1,PRKCD,ICAM1,GRM5,LEP,APPL2,FOXC2,IGF1R,BAIAP2L1,INSR,HDAC9,ATP2B1,NR1H4,CAMK2A,CHMP5,ZDHHC7,TRARG1,TP53,PDPK1,AHCYL1,GRB1…
GO:BP	epithelial cell proliferation	GO:0050673	0.00140463	2.85244	285	4434	120	15439	CLDN1,IQGAP3,ECM1,IGF1,FGF7,EHF,BMP5,HGF,KLF9,SFRP2,PPARD,F3,SP1,PURA,CD109,IGFBP5,THBS1,CYP7B1,SGPP2,YAP1,KDM5B,ERN1,DLG1,NRAS,BCL2L2,SNAI2,WDR48,FOXP1,CAV2,ZFP36L1,CASK,TCF7L2,MAPK1,NOTCH2,CDK6,FRS2,PTPRK,SOX9,EGFR,COL8A1,TP63,A4GNT,HTR2B,KDR,NFIB,PAX6,SMAD3,PROX1,VHL,RREB1,STOX1,CDKN1C,HES1,PTCH1,MCC,RB1,TNFSF11,CEBPB,EYA1,VASH2,NF1,NR2F2,PRKD1,CTNNB1,MYDGF,C6ORF89,FGFR1,LEP,TGFBR1,JCAD,PYGO2,…
GO:BP	regulation of transmembrane transport	GO:0034762	0.00147975	2.82981	340	4434	139	15439	CXCL10,ADIPOQ,ANO6,IGF1,ATG5,CRHBP,HOMER1,CACNB2,SLC1A2,ATP1B1,CLIP3,SLMAP,CFTR,KCNJ16,ANK3,CACNA2D1,KLHL24,C2CD5,CACNA1C,NR4A3,FYN,THBS1,RHOQ,CLIC4,KCNS2,LYN,KCNA4,PTPN11,AZIN1,DLG1,AMIGO1,PKD2,UBQLN1,KCNC1,CNIH3,RANGRF,KCNJ2,CD19,NETO1,NEDD4L,KCND3,CTTNBP2NL,SRI,WDR1,KCNH8,ENPP1,SLC30A1,SPHK2,PID1,KCNE2,KCNJ3,KCNA3,KCNJ13,TCAF1,KCNIP4,CXCL11,ARL6IP5,CACNG3,SCN7A,PRKCB,FFAR4,ENSCHIG00000018503,O…
GO:BP	positive regulation of organelle organization	GO:0010638	0.00148352	2.82871	434	4434	171	15439	CCT8,PSRC1,ELAPOR1,POT1,CNOT2,IGF1,SLAIN2,G3BP1,PIP4K2A,RNF40,MIER1,VPS4B,SFPQ,MCU,BRAF,C2CD5,HIF1A,JMY,GMFB,NIN,PAX7,PAN3,RAD21,ARHGAP35,PPM1E,NCKAP1,DLG1,MET,PPHLN1,HMBOX1,MNS1,STMN2,NSD3,MIEF1,VPS13D,TNKS2,JARID2,SPIRE1,SMAD4,LMAN1,MAPK3,SYT7,MAPK1,KMT2E,AP1AR,WDR1,AKAP8,LPAR1,CDK9,NRP1,HNRNPU,VASP,SPHK2,RICTOR,BCL6,LNPK,TOMM7,KDR,CNOT6L,ANXA1,PLEK,RAB3GAP2,SMPD3,DMRTC2,CALCOCO2,TASOR,CEP135,F…
GO:BP	chromatin organization	GO:0006325	0.00155946	2.80703	524	4434	201	15439	ANP32E,DR1,USP15,LEF1,NR3C1,ATG5,EPC1,RRP8,CHD9,MYOCD,MBTD1,UBN1,RNF40,SPTY2D1,TSPYL5,MIER1,H1-6,SMCHD1,ACTR8,RYBP,H1-3,NAA50,BRPF3,SFPQ,KMT5B,GATAD1,PCGF3,KDM4B,PHF2,SATB1,KAT2B,ARID1B,PAX7,ENSCHIG00000023777,WAC,ASXL1,UBR5,PRDM16,ENSCHIG00000011390,KDM5B,SETD6,TLK1,IWS1,ATF2,PPHLN1,PWP1,DNMT3A,SETDB2,NSD3,NAP1L5,ENSCHIG00000007799,CBX8,JARID2,UBR2,SMAD4,MAPK3,ASH2L,ERCC6,RSF1,JADE3,KMT2E,ARID2,…
GO:BP	negative regulation of protein metabolic process	GO:0051248	0.00156653	2.80506	784	4434	286	15439	RIDA,ADIPOQ,EPHA4,ECM1,DHCR24,IGF1,LEF1,TNFAIP8,NCOA7,ATG5,PAIP2B,SOCS5,ITCH,ENSCHIG00000024446,PKIA,TRIM21,YOD1,MYOCD,ENC1,INPP5F,HGF,PAQR3,CAMLG,APC,SFRP2,RYBP,RBM24,TRAF3IP1,RABGEF1,CPEB3,AGO3,IKBKB,DUSP4,SVIP,GLMN,PRKAG2,DUSP6,LMO3,LARP1,PURA,KDM4B,C9ORF72,PLAA,RECK,USP25,CD109,FYN,SNX3,UBE2J1,SYNCRIP,KAT2B,STYX,IGFBP5,THBS1,BIRC6,WAC,UBR5,LYN,AGO2,RC3H1,GLG1,TIMP2,PPM1E,PAFAH1B1,IREB2,DAG1,A…
GO:BP	small GTPase mediated signal transduction	GO:0007264	0.00157903	2.80161	297	4434	124	15439	KITLG,RABL3,RAPGEF4,IQGAP3,IGF1,HACD3,ABRA,GARRE1,RAP1GAP2,RIPOR2,CD2AP,RABGEF1,ITSN1,DOCK7,RAPGEF5,RAB21,TIAM1,EPS8,RASGRF2,ARFGEF3,RHOQ,RALGPS1,ARFGEF1,RRAS2,CBL,RALGPS2,ARHGAP35,NCKAP1,CCDC125,RAP1B,CDC42SE1,NRAS,MET,RHOJ,RAB39A,RANGRF,KCTD13,CSF1,RASA1,DOCK8,SSX2IP,NOTCH2,ELMO1,KRAS,RAP2B,ENSCHIG00000014970,LPAR1,SOS1,NRP1,RALGAPB,KPNB1,AKAP13,RALGAPA1,ARHGAP31,BCL6,DOCK4,ABCA1,ARHGEF12,PECAM…
GO:BP	peptidyl-serine phosphorylation	GO:0018105	0.00171452	2.76586	185	4434	84	15439	HGF,PAQR3,SFRP2,SMG1,IKBKB,DOCK7,DYRK1A,ERN1,TGFBR2,UHMK1,PWP1,BDNF,HIPK3,PIKFYVE,MAPK1,SRPK2,NSD1,RICTOR,EGFR,MAP3K13,PIK3CA,GADD45A,MAP3K12,STOX1,PRKAA2,CAPRIN2,WNK1,APP,FNIP1,NCK1,MAPK9,NTRK2,TTK,LATS1,TTBK2,PRKCE,PTGS2,STK39,TLK2,VRK1,PRKCD,SYK,ARRB1,AKAP9,STK4,MAPK13,ENSCHIG00000022037,CSNK1G3,TGFBR1,PLCL2,NEK6,NTRK3,IL11,TFRC,LRRK2,PLCL1,CAMK2A,AURKB,TNKS,CDK1,FNIP2,LMTK2,RET,PAK2,PRKACA,EP…
GO:BP	regulation of cell morphogenesis	GO:0022604	0.00174308	2.75868	286	4434	120	15439	EPHA4,SPART,MYL12B,EPB41L3,BRAF,RAB21,SYT1,EPS8,PLAA,PHIP,FYN,NIN,RHOQ,YTHDF1,RIMS1,ARHGAP35,FMNL2,BAIAP2,CRK,PAFAH1B1,DLG1,FN1,CDC42SE1,RHOJ,BDNF,NEDD9,NEDD4L,AP1AR,WDR1,PTPRS,LPAR1,UST,NRP1,SS18L1,PREX1,CAPRIN1,CORO1C,SH3D19,ZEB2,ENSCHIG00000017892,MAP3K13,ERMN,MAP2,SEMA3A,PPFIA2,KDR,WDR36,ANXA1,SRF,SYT4,RREB1,LIMK1,LARP4,CAPRIN2,P2RY1,FBLN1,EFNA5,FSTL4,ENSCHIG00000017824,BAMBI,SRC,ENPP2,RDX,KI…
GO:BP	organelle localization	GO:0051640	0.00187423	2.72718	318	4434	131	15439	MREG,SYT11,VPS45,PSRC1,STX17,GJA1,BLOC1S6,ENSCHIG00000023339,CFTR,VPS4B,SEH1L,RABGEF1,CCDC186,HOOK3,FNBP1L,STARD3NL,HIF1A,NIN,LYN,MARK1,PAFAH1B1,MEIOC,TRAK1,DLG1,PIP4P1,TRIP11,IKBKG,CAV2,SPIRE1,SHROOM2,AP1AR,PCDH17,FAM91A1,HNRNPU,SPHK2,CHMP6,RHOT1,SPAG9,KPNB1,PLEKHM1,CHMP2B,CDCA8,PPFIA2,INTS13,PEX13,PLEK,KIF5B,PAX6,C17ORF75,NDC80,AP3M1,SPAST,ENSCHIG00000016809,CDH2,ESYT2,USO1,ATG14,XPO1,ITGB1,PAB…
GO:BP	response to peptide hormone	GO:0043434	0.00188163	2.72547	169	4434	78	15439	ADIPOQ,CRHBP,PIK3R1,APC,GLP1R,C2CD5,PHIP,KAT2B,IGFBP5,RHOQ,TBC1D4,PTPN11,ENSCHIG00000010440,GHRHR,CAV2,ZFP36L1,CPEB1,TRIM72,TGFBR3,ENPP1,SNX5,SORL1,GPLD1,NR4A2,PID1,CREB1,RPE65,SOCS2,OTOP1,SLC39A14,FER,RAB31,OSBPL8,USO1,EGR1,NCK1,DENND4C,KL,SRC,PTPN1,SESN3,INHBB,NDEL1,PRKCD,EPM2AIP1,LEP,APPL2,FOXC2,BAIAP2L1,SORT1,INSR,HDAC9,ATP2B1,VPS13C,NR1H4,CAMK2A,ZDHHC7,TRARG1,PDPK1,AHCYL1,GRB10,CPEB2,PTK2,SL…
GO:BP	signal release	GO:0023061	0.00192066	2.71655	353	4434	143	15439	RAPGEF4,SYT11,SLC9B2,GJA1,CRHBP,CACNB2,CFTR,LCP2,RAB11FIP2,CCDC186,MCU,GLMN,BRAF,SYT1,HIF1A,NAPB,LYN,LIN7C,KDM5B,PTPN11,ENSCHIG00000010440,FBXL20,RAP1B,FN1,PPT1,GHRHR,RFX3,PCSK5,SNAP25,GPAM,ILDR2,CASK,TNFRSF11A,SMAD4,TCF7L2,SNX19,SYT7,FRMD8,SRI,ENSCHIG00000026624,SLC4A8,CPLX2,PAX8,SORL1,LTBP4,SPHK2,NEUROD1,ITGB6,ENSCHIG00000013367,KLF7,CREB1,HTR2B,HAVCR2,ANXA1,ABCA1,HTR1B,VSNL1,ATP2A2,SMPD3,RAP1A…
GO:BP	negative regulation of cell population proliferation	GO:0008285	0.00210967	2.67578	445	4434	174	15439	ADIPOQ,ITCH,MYOCD,BMP5,PRKG1,ENSCHIG00000006638,KLF9,APC,SFRP2,DDR1,PPARD,LZTS2,GLMN,RBPJ,CD109,KAT2B,IGFBP5,THBS1,CYP1B1,NACC2,ENSCHIG00000023777,DACH1,PDS5B,LYN,DNAJB2,RC3H1,TMEM131L,DLG1,DDAH1,SNAI2,BDNF,TNFRSF9,MINAR1,RARB,CAV2,BMPR1B,PTPRJ,CASK,JARID2,SMAD4,TWSG1,CDK6,RERG,E2F7,ARID2,CTNNA1,ENSCHIG00000015151,PTPRK,STRN,STK3,IHH,SH2B3,GPLD1,SOX9,ITGA1,KLF13,BCL6,A4GNT,HAVCR2,NFIB,PELI1,TP53I…
GO:BP	vesicle organization	GO:0016050	0.00217312	2.66292	156	4434	73	15439	TBPL1,VAPA,VPS4B,HOOK3,HOOK1,FNBP1L,C2CD5,PHETA2,SEC24A,SNX3,RAB22A,PAFAH1B1,RAB39A,CAV2,PIKFYVE,PICALM,SNX19,SYT7,ATP13A2,MFSD14A,ENSCHIG00000026624,CPLX2,SEC23B,VAMP4,CORO1C,ZEB2,CHMP2B,CREB1,ANXA1,ABCA1,STAM,ZPBP2,EXOC8,SNX10,EEA1,RAB5B,USO1,RAB20,UVRAG,DNM3,MYO18A,GOLPH3,SEC23A,STXBP6,SEC31A,ENSCHIG00000021578,STX1B,SORT1,TMEM127,TGFBRAP1,SEC16A,VPS41,SNX11,VAMP3,ARFGEF2,PLA2G3,TRARG1,ANKFY1,…
GO:BP	chemical homeostasis	GO:0048878	0.00217803	2.66194	697	4434	257	15439	CXCL10,ATP6V1A,CLDN1,ADIPOQ,MAIP1,SLC9B2,RAP1GDS1,SLC4A4,GRIA1,ATG5,HOMER1,HACD3,CACNB2,TGM2,ATP1B1,SLC10A7,SLC7A11,CARTPT,PIK3R1,SLMAP,CFTR,SLC30A9,TMEM64,ATP2B2,GLP1R,RAB11FIP2,CCDC186,ANK3,MCU,GRIN2B,CACNA1C,ATF4,LETM1,ARF1,FYN,ENSCHIG00000018293,GRM1,HIF1A,CERT1,IGFBP5,CLIC4,MICU2,LYN,PTPN11,ATP6V0A2,TRPC3,TMC8,ERN1,UBE3A,IREB2,SLC30A7,PPT1,MET,GHRHR,ENSCHIG00000026028,PKD2,ANGPTL8,AP3D1,RAB3…
GO:BP	positive regulation of nervous system development	GO:0051962	0.00219513	2.65854	313	4434	129	15439	NDNF,RETREG3,BMP5,KIF20B,LRRTM3,ADGRL1,ADRA2B,LRRN1,BRAF,RAB21,SYT1,JADE2,PLAA,VLDLR,FYN,HIF1A,NIN,LYN,RIMS1,ARHGAP35,MMD,PAFAH1B1,FN1,AMIGO1,STMN2,BDNF,BEND6,CSF1,NEDD4L,VSTM5,CLSTN2,ENSCHIG00000015151,CAMK1D,SS18L1,TGIF2,CAPRIN1,ZEB2,SPAG9,EPHA3,BCL6,MAP3K13,ECT2,NEUROD1,SEMA3A,SOCS2,ASCL1,UFL1,FLRT3,PAX6,SRF,SYT4,RAP1A,LRRN3,NCOA1,PROX1,SHTN1,LIMK1,CDON,HES1,CAPRIN2,EP300,GRID2,EFNA5,NCK1,FZD3…
GO:BP	myeloid cell differentiation	GO:0030099	0.00244983	2.61086	279	4434	117	15439	KITLG,ADIPOQ,CLDN18,LEF1,SLC9B2,PIP4K2A,PIK3R1,MITF,TMEM64,ETS1,RBPJ,CD109,HIF1A,MEIS2,ABI1,KLF10,LYN,DYRK3,PTPN11,PAFAH1B1,IREB2,NFKBIA,TGFBR2,MEIS1,SLC25A38,FOXP1,CSF1,ZFP36L1,TNFRSF11A,SH3PXD2A,FLI1,TFE3,NOTCH2,PIAS3,KMT2E,CDK6,WDR1,UBA5,TMEM178A,SH2B3,KLF13,BCL6,CREB1,LOX,SMAD5,UFL1,SRF,TMEM14C,PRDX3,LRRC17,SNX10,MTURN,EP300,PPARGC1B,NDFIP1,APP,KLF2,ENSCHIG00000009916,FBN1,TMOD3,RB1,TNFSF11,S…
GO:BP	morphogenesis of a branching structure	GO:0001763	0.0026046	2.58426	162	4434	75	15439	LEF1,FGF7,TGM2,HGF,SFRP2,DDR1,GREB1L,CLIC4,YAP1,KDM5B,DAG1,TGFBR2,DLG1,MET,PKD2,RSPO3,HHIP,CSF1,SMAD4,FRS2,KRAS,PAX8,IHH,SOX9,BTBD7,TP63,MAP3K13,ERMN,SEMA3A,KDR,RDH10,ADM,SRF,NPNT,PROX1,PTCH1,SRC,EYA1,FZD5,TBX3,FAT4,GNA13,SETD2,CTNNB1,EPHA7,STK4,FGFR1,GBX2,FOXC2,GDNF,VDR,EDN1,LRRK2,PGR,FEM1B,SIX4,SIX1,SFRP1,SLIT2,GZF1,SPINT2,SOCS3,HOXB7,AREG,DCHS1,LGR4,SEMA3C,IL10,FGF10,TBX20,BMP7,VANGL2,PRDM1,WT…
GO:BP	neuron death	GO:0070997	0.00291909	2.53475	198	4434	88	15439	NDNF,NCOA7,ADNP,SLC7A11,POLB,ITSN1,BRAF,ATF4,GABRB2,FYN,HIF1A,TYRO3,RRAS2,PPT1,BDNF,AXL,THRB,CSF1,PICALM,KRAS,SORL1,NR4A2,TP63,PIK3CA,MAP3K12,ASCL1,MAP3K5,CASP9,CHL1,CASP7,USP53,GRID2,APP,SLC1A1,SOD2,GPR75,RB1,CEBPB,DIABLO,MAP2K4,CTNNB1,PTPRZ1,EPHA7,FADD,ATN1,EGLN2,GDNF,LRRK2,LANCL1,MEF2C,NEFL,SIX4,FBXW7,PLA2G3,TP53,ENSCHIG00000015968,CLCF1,APAF1,SIX1,SYNGAP1,TNFRSF21,CASP3,EN2,XRCC2,PPARGC1A,WFS…
GO:BP	positive regulation of cellular component biogenesis	GO:0044089	0.0030624	2.51394	379	4434	151	15439	PSRC1,ELAPOR1,CNOT2,CLEC7A,SLAIN2,G3BP1,PIP4K2A,RIPOR2,LRRTM3,ADGRL1,APC,LRRN1,VPS4B,FNBP1L,BRAF,JMY,GMFB,NIN,RHOQ,PAN3,ARHGAP35,PPM1E,NCKAP1,ICE1,DAG1,RAP1B,DLG1,AMIGO1,MET,PPHLN1,MNS1,BDNF,PTPRJ,SPIRE1,VSTM5,ATP13A2,AP1AR,CLSTN2,LPAR1,ENSCHIG00000015151,AJUBA,NRP1,VASP,SOX9,PLEKHM1,RICTOR,TPPP,KDR,CNOT6L,ABCA1,PLEK,FLRT3,STAM,RAB3GAP2,TASOR,SRF,RIOK1,LRRN3,CEP135,FER,SMAD3,CCDC88A,PROX1,TOGARAM…
GO:BP	reproductive system development	GO:0061458	0.0030775	2.5118	306	4434	126	15439	KITLG,DHCR24,LEF1,RXFP2,MYOCD,GNRH1,SFRP2,PPARD,FOXF2,GREB1L,GAS2,ARNT,LHX8,RBPJ,CTSB,ENSCHIG00000018293,HIF1A,TYRO3,MERTK,BIRC6,CYP7B1,LHX9,KDM5B,PTPN11,SALL1,UBE3A,DLG1,PKD2,RSPO3,BCL2L2,TCF23,AXL,WDR48,BMPR1B,ZFP36L1,SMAD4,PLEKHA1,MAPK1,NOTCH2,FRS2,STK3,SOX9,TP63,SEMA3A,PDGFRA,RDH10,ADM,PRDX3,ARID5B,E2F8,ADAMTS1,NCOA1,FOXC1,ING2,ASH1L,HES1,PTX3,HEY2,TAF4,SRC,CEBPB,FZD5,PTGS2,VASH2,ASPM,PATZ1,T…
GO:BP	cellular response to stimulus	GO:0051716	0.00331576	2.47942	5578	4434	1728	15439	CD36,KITLG,CXCL10,OPRK1,ARL13B,ATP6V1A,RABL3,ADIPOQ,NCEH1,CLDN18,RAPGEF4,CXCR4,EPHA4,RHBDD1,KHDRBS1,IQGAP3,ECM1,ELAPOR1,TUT4,TM2D1,LURAP1,FIGNL1,POT1,ANO6,PRICKLE1,CNOT2,USP15,IGF1,NUAK1,KLRK1,CLEC7A,NDNF,LEF1,TBCK,SLC9B2,LAMTOR3,ARAP2,TMEM33,GABRG1,GABRA2,SULT1B1,ARHGAP24,MAPK10,NR3C1,G3BP1,GRIA1,SLU7,GABRA6,ARRDC3,ASPN,NCOA7,GJA1,ATG5,PDE7B,BCLAF1,CRHBP,HOMER1,HACD3,UBR1,GNG2,FGF7,PPP2R5E,SOCS5…
GO:BP	endomembrane system organization	GO:0010256	0.0033422	2.47597	269	4434	113	15439	SYT11,ANO6,TMEM33,STX17,TBPL1,GCC2,NUP155,GOLGA5,VTI1A,VPS4B,EPB41L3,HOOK3,ANK3,REEP3,HOOK1,FNBP1L,PHETA2,SNX3,CERT1,RAB22A,RAB2A,ARFGEF1,MTSS1,BAIAP2,PAFAH1B1,TMED5,ANO4,TRIP11,CAV2,TRIM72,LMAN1,SNX19,SYT7,SMPD4,MFSD14A,ENSCHIG00000026624,HACE1,SPTBN1,VAMP4,CORO1C,CHMP2B,LNPK,CREB1,SH3TC2,ABCA1,RAB10,ANO3,RAB3GAP2,CRB1,ATP2A2,ZPBP2,TRAPPC8,EXOC8,SPAST,SHTN1,ESYT2,SNX10,RAB5B,MICALL1,USO1,LYSMD3,…
GO:BP	protein autophosphorylation	GO:0046777	0.00347984	2.45844	163	4434	75	15439	ADIPOQ,EPHA4,DDR1,SMG1,EEF2K,DYRK1A,FYN,TYRO3,LYN,ULK2,ERN1,UHMK1,TEC,PIKFYVE,PDGFA,MAPK3,CDKL5,ATP13A2,RAP2B,ENPP1,EGFR,MAP3K13,DDR2,MAP3K12,PDGFRA,KDR,TRPM7,FER,MRE11,TRIM24,TTK,SRC,STK39,VRK1,RIOK2,PTK2B,SYK,EPHA7,STK4,FGFR1,NEK6,IGF1R,PEAK1,INSR,LRRK2,TNIK,ACVR1B,CAMK2A,TEK,CHEK2,RAP2A,LMTK2,CAMK2G,PAK2,CSF1R,PRKACA,ROS1,PTK2,CAMKK2,NLK,KIT,MOB1B,PDGFRB,MAP3K9,CAV1,IMPACT,ENSCHIG00000022551,S…
GO:BP	negative regulation of cell development	GO:0010721	0.0035603	2.44851	196	4434	87	15439	CLDN18,EPHA4,IGF1,SPART,RAP1GAP2,INPP5F,PAQR3,GNRH1,HOOK3,DDX6,MEIS1,STMN2,BDNF,THRB,MYLIP,SMAD4,AP1AR,EIF4E,CTNNA1,PTPRS,LPAR1,ENSCHIG00000015151,SORL1,CORO1C,SOX9,PTPN9,NEPRO,MAP2,SEMA3A,ASCL1,LDLR,PAX6,MIB1,GFI1,HES1,HOXA2,FBLN1,EFNA5,FSTL4,APP,ENSCHIG00000009916,FBN1,RAB29,ASPM,KIAA0319,ZNF536,CTNNB1,EPHA7,APPL2,PRKCSH,BMERB1,DAB1,PTN,LRIG2,CIB1,DAAM2,TBX6,FBXW7,TP53,BAG5,MELTF,SYNGAP1,EFNA1,…
GO:BP	reproductive structure development	GO:0048608	0.0036826	2.43385	304	4434	125	15439	KITLG,DHCR24,LEF1,RXFP2,MYOCD,GNRH1,SFRP2,PPARD,FOXF2,GREB1L,GAS2,ARNT,LHX8,RBPJ,CTSB,ENSCHIG00000018293,HIF1A,TYRO3,MERTK,BIRC6,CYP7B1,LHX9,KDM5B,PTPN11,SALL1,UBE3A,DLG1,PKD2,RSPO3,BCL2L2,TCF23,AXL,WDR48,BMPR1B,ZFP36L1,SMAD4,PLEKHA1,MAPK1,NOTCH2,FRS2,STK3,SOX9,TP63,SEMA3A,PDGFRA,RDH10,ADM,PRDX3,ARID5B,E2F8,ADAMTS1,NCOA1,FOXC1,ING2,ASH1L,HES1,PTX3,HEY2,TAF4,SRC,CEBPB,FZD5,PTGS2,VASH2,ASPM,PATZ1,T…
GO:BP	regulation of cell growth	GO:0001558	0.00397112	2.40109	230	4434	99	15439	PSRC1,IGF1,LEF1,SPART,MYOCD,DCUN1D3,SFRP2,DDR1,EPB41L3,SYT1,APBB2,PLAA,IGFBP5,RIMS1,DNAJB2,TMC8,ENSCHIG00000019133,FN1,PPT1,BDNF,MINAR1,IP6K2,PTPRJ,NEDD4L,SMAD4,RERG,PTPRS,NCBP1,ENPP1,CDA,SPHK2,EGFR,N6AMT1,DCBLD2,BCL6,MAP3K13,MAP2,ST7L,SEMA3A,SOCS2,WDR36,SRF,SYT4,SMAD3,LIMK1,CAPRIN2,EFNA5,FSTL4,ADAM10,RB1,KIAA0319,EPHA7,HNF4A,FAM107A,KAZALD1,SYT17,TGFBR1,IGFBPL1,CRLF3,NTRK3,MEGF8,EDN1,CIB1,MACF1,…
GO:BP	peptidyl-serine modification	GO:0018209	0.00398911	2.39912	202	4434	89	15439	NDNF,HGF,PAQR3,SFRP2,SMG1,IKBKB,DOCK7,DYRK1A,ERN1,TGFBR2,UHMK1,PWP1,BDNF,HIPK3,PIKFYVE,MAPK1,SRPK2,NSD1,GALNT16,RICTOR,EGFR,MAP3K13,PIK3CA,GADD45A,MAP3K12,STOX1,PRKAA2,CAPRIN2,WNK1,APP,FNIP1,NCK1,MAPK9,NTRK2,TTK,LATS1,TTBK2,PRKCE,POGLUT3,PTGS2,STK39,TLK2,VRK1,PRKCD,SYK,ARRB1,AKAP9,STK4,MAPK13,ENSCHIG00000022037,CSNK1G3,TGFBR1,PLCL2,NEK6,NTRK3,IL11,TFRC,LRRK2,GALNT3,PLCL1,CAMK2A,AURKB,TNKS,CDK1,FN…
GO:BP	regulation of cellular amide metabolic process	GO:0034248	0.00402211	2.39555	267	4434	112	15439	RIDA,EPHA4,KHDRBS1,IGF1,PAIP2B,SLC7A11,ENC1,LRRTM3,RBM24,CPEB3,AGO3,SAMD8,RBM4B,SP1,LARP1,PURA,ETF1,SYNCRIP,IGFBP5,THBS1,YTHDF1,AGO2,RC3H1,DPH1,IREB2,UHMK1,PLD1,ZFP36L1,CPEB1,PICALM,GSAP,EIF5A2,SLC2A13,EIF4E,KHSRP,NCBP1,CAPRIN1,SORL1,SPHK2,FXR2,NSUN3,CNOT6L,CNOT8,SRP9,KBTBD8,SOX4,GSPT1,LARP4,CAPRIN2,TNRC6B,APP,NCK1,ILF3,NTRK2,TIA1,LARP4B,PDK1,TOB1,CHRNA7,PRKCD,RBMS3,GRM5,UNK,PER1,BOLL,TNRC6A,SERP…
GO:BP	vesicle-mediated transport in synapse	GO:0099003	0.00437735	2.35879	108	4434	54	15439	RAPGEF4,CACNB2,ITSN1,RAB3B,BRAF,SYT1,PLAA,STON2,NAPB,ENSCHIG00000010440,FBXL20,RAP1B,DNAJC6,SNAP25,PLD1,CASK,SYT7,SYP,SLC4A8,ENSCHIG00000015151,CPLX2,PCDH17,ENSCHIG00000013367,ATP2A2,FCHO2,RAP1A,PRKCB,CDH2,CNR1,DNM3,CTNNB1,CADPS2,ENSCHIG00000021578,STX1B,ENSCHIG00000022037,STXBP5L,LRRK2,STX3,CANX,CAMK2A,SLC17A6,PPP3CB,STXBP1,DOC2B,CACNA1D,SNAPIN,PSEN1,CALY,APBA1,SYNJ1,ADCY1,SH3GL1,CACNA1A,GIPC1
GO:BP	cellular response to oxidative stress	GO:0034599	0.00438781	2.35775	172	4434	78	15439	NCOA7,SLC7A11,HGF,SFPQ,SLC25A24,ARNT,ATF4,ENSCHIG00000018293,HIF1A,GCH1,CYP1B1,MET,UBQLN1,NET1,MAPK3,PLEKHA1,MAPK1,ATP13A2,PTPRK,NR4A2,EGFR,ECT2,PRKRA,PDGFRA,FANCC,MAP3K5,TP53INP1,ATP2A2,SMPD3,ARL6IP5,PRDX3,FER,VKORC1L1,CHUK,PRKAA2,PPARGC1B,MAPK9,SLC1A1,SOD2,SETX,SRC,DIABLO,STX2,SIRT2,PDK1,CTNNB1,PRKCD,RBM11,MAPK13,PAWR,FANCD2,LRRK2,PLA2R1,LANCL1,GPR37,VNN1,TNFAIP3,FBXW7,PLA2G3,TP53,BAG5,BRF2,PSA…
GO:BP	developmental growth involved in morphogenesis	GO:0060560	0.00442507	2.35408	153	4434	71	15439	SPART,SFRP2,DDR1,LZTS2,SYT1,CYFIP2,JADE2,C9ORF72,PLAA,NIN,RIMS1,YAP1,KDM5B,TGFBR2,FN1,BDNF,CSF1,NEDD4L,PTPRS,ZEB2,SOX9,MAP3K13,MAP2,SEMA3A,WDR36,FLRT3,RDH10,SRF,SYT4,LIMK1,EFNA5,FSTL4,APP,ITGB1,KIF26B,RAPH1,KIAA0319,NDEL1,CTNNB1,EPHA7,SLIT1,SYT17,IQGAP1,NTRK3,MEGF8,CYFIP1,NRP2,MACF1,SIX4,VCL,SIX1,BMPR2,PTK7,SFRP1,LPAR3,SLIT2,RYK,FMN1,DCLK1,CDH4,POU4F2,MAPT,LLPH,AREG,PAK6,TNR,FGF10,IMPACT,SMURF1,S…
GO:BP	regulation of cellular response to growth factor stimulus	GO:0090287	0.00443253	2.35335	208	4434	91	15439	ASPN,SPART,MYOCD,ADAMTS12,ONECUT2,SFRP2,ENSCHIG00000008899,RBPJ,CYFIP2,CD109,HIF1A,THBS1,PRDM16,GLG1,EPN2,CHST11,RNF111,HHIP,CAV2,CASK,SMAD4,TWSG1,TGFB1I1,SNX25,NOTCH2,PMEPA1,SORL1,TRIM33,LOX,NPNT,VEPH1,SMAD3,PRKCB,ING2,CDKN1C,HES1,LEMD3,EP300,CTDSPL2,FBN1,ENSCHIG00000017824,LTBP1,SPRED2,ZEB1,BAMBI,PTPN1,ZNF423,TOB1,CTNNB1,CIDEA,FGFR1,ZBTB7A,JCAD,ITGA3,CDH5,RUNX2,ZNF451,ADAMTS3,CYFIP1,ADAM17,TP53…
GO:BP	protein localization to organelle	GO:0033365	0.00449403	2.34736	528	4434	200	15439	CCT8,CLDN18,MAIP1,SYT11,POT1,PRICKLE1,GCC2,CEP68,ARL5B,ABRA,PIK3R1,NUP155,VAPA,KIF20B,GPR137B,WAPL,PAQR3,APC,TMEM107,ILRUN,CD2AP,CHP2,LZTS2,HOOK3,TOMM20,MDFIC,XPA,FYN,RAB8B,ENSCHIG00000023777,KPNA3,TAF3,UBR5,RAD21,RAB6A,IPO7,ARL5A,RABEP1,TNPO1,NFKBIA,DLG1,SEC62,PPHLN1,SRP72,TNPO2,SNAP25,TIMM22,PIKFYVE,TNKS2,ATP13A2,GNPTAB,CNTLN,SEC63,AKAP11,GDAP1,SORL1,HNRNPU,TCTN1,SOX9,KPNB1,CCDC14,ECT2,TOMM7,TT…
GO:BP	actin cytoskeleton organization	GO:0030036	0.00472795	2.32533	483	4434	185	15439	ABI2,GAS2L3,TBCK,FGF7,DAAM1,CDC42BPA,PIK3R1,PDLIM3,ENSCHIG00000023712,CD2AP,EPB41L3,IKBKB,MCU,PPFIA1,BRAF,EPS8,CYFIP2,C9ORF72,JMY,GMFB,RHOQ,CYRIA,ABI1,EPB41L1,ARFGEF1,MTSS1,NPHS2,SSH1,ARHGAP35,FMNL2,ACTG1,BAIAP2,PPM1E,CRK,PAFAH1B1,NCKAP1,DLG1,CAPZA1,MET,RHOJ,FOXP1,KCTD13,ENSCHIG00000012574,RASA1,SPIRE1,SMAD4,NOTCH2,ELMO1,TWF1,KRAS,AP1AR,WDR1,PALLD,LPAR1,MARCKS,TMOD2,PLEKHH2,SPTBN1,NRP1,PARVA,CORO…
GO:BP	neuron apoptotic process	GO:0051402	0.00497101	2.30356	148	4434	69	15439	NDNF,ADNP,POLB,ITSN1,BRAF,ATF4,GABRB2,HIF1A,TYRO3,PPT1,BDNF,AXL,THRB,KRAS,NR4A2,TP63,PIK3CA,MAP3K12,ASCL1,CASP9,CHL1,CASP7,USP53,GRID2,APP,SOD2,RB1,CEBPB,DIABLO,MAP2K4,CTNNB1,PTPRZ1,EPHA7,FADD,ATN1,EGLN2,GDNF,LANCL1,MEF2C,NEFL,SIX4,FBXW7,PLA2G3,TP53,CLCF1,APAF1,SIX1,SYNGAP1,TNFRSF21,CASP3,EN2,XRCC2,PPARGC1A,WFS1,STXBP1,TMTC4,TGFB2,KDM2B,SCN2A,PSEN1,ALKBH1,LIG4,CNTF,PRKCI,AARS1,FGF20,BCL2L11,HIPK2…
GO:BP	cellular response to steroid hormone stimulus	GO:0071383	0.00507195	2.29483	111	4434	55	15439	CNOT2,LEF1,NR3C1,KLF9,LMO3,UBR5,CYP7B1,YAP1,CREBRF,UBE3A,GHRHR,FOXP1,ZFP36L1,EIF4E,UBA5,HNRNPU,DDX5,AKAP13,TP63,RBFOX2,ANXA1,UFL1,DNAAF4,HNF4G,CASP9,EP300,PPARGC1B,LATS1,SRC,FAM107A,ZBTB7A,PER1,TFPI,PGR,ATP1A2,FBXO32,ESRRG,DAB2,DDIT4,ZFP36L2,TFAP4,SFRP1,HEYL,KMT2D,POU4F2,WBP2,NCOR1,TMF1,CRY1,URI1,PPARA,BMP7,CLOCK,FOXH1,KANK2
GO:BP	hemopoiesis	GO:0030097	0.00524717	2.28007	590	4434	220	15439	KITLG,RABL3,ADIPOQ,CLDN18,PGLYRP3,LEF1,SLC9B2,ATG5,SOCS5,PIP4K2A,ATXN1L,PIK3R1,MITF,TMEM64,SFRP2,SBDS,ETS1,BRAF,ATF4,RBPJ,CD109,SATB1,HIF1A,STON2,TYRO3,MEIS2,MERTK,ABI1,KLF10,LYN,DYRK3,RC3H1,PTPN11,TMEM131L,PAFAH1B1,IREB2,JAG2,NFKBIA,TGFBR2,RBM47,MEIS1,AXL,AZI2,SLC25A38,FOXP1,CD19,CSF1,ZFP36L1,RTKN2,TNFRSF11A,TWSG1,SH3PXD2A,PICALM,FLI1,TFE3,NOTCH2,PIAS3,KMT2E,CDK6,ITFG2,WDR1,UBA5,ENSCHIG000000151…
GO:BP	cell junction organization	GO:0034330	0.00545303	2.26336	409	4434	160	15439	CLDN1,EPHA4,NFIA,LRRC4,GABRA2,SLC7A11,CHRNB1,MPP2,LRRTM3,ADGRL1,LRRN1,DSG2,EPB41L3,IKBKB,ANK3,SHANK2,HIPK1,GABRB2,FYN,GLRB,ACTG1,PAFAH1B1,RAP1B,DLG1,FN1,CAPZA1,AMIGO1,SNAI2,BDNF,PTPRJ,VSTM5,SLITRK2,RASSF8,WDR1,CLSTN2,CTNNA1,PTPRS,PTPRK,MYO9A,AJUBA,PCDH17,NRP1,CAPRIN1,CORO1C,SEZ6L,SLC8A2,TANC1,ENSCHIG00000017892,BSN,EPHA3,ECT2,ENSCHIG00000013367,PPFIA2,KDR,SLITRK6,FLRT3,PECAM1,SRF,RAP1A,LRRN3,GABR…
GO:BP	dendrite development	GO:0016358	0.00561399	2.25073	135	4434	64	15439	EPHA4,BMP5,PRKG1,RAB21,VLDLR,FYN,ARID1B,ABI1,MATN2,MARK1,BAIAP2,CRK,PAFAH1B1,UBA6,BDNF,PICALM,PTPRS,CAMK1D,SS18L1,PREX2,CAPRIN1,KLF7,MAP2,SEMA3A,PPFIA2,CAPRIN2,FSTL4,APP,ENSCHIG00000017824,ITGB1,KIAA0319,SHANK1,SEZ6,ENSCHIG00000022255,DGKG,DAB1,PTN,LRRK2,TNIK,ELAVL4,CAMK2A,MEF2C,MAPK6,RAP2A,SYNGAP1,ENSCHIG00000024289,EFNA1,PAK2,PPP3CA,SLITRK5,DCLK1,CAMSAP2,SARM1,SCARF1,CTNND2,LLPH,PSEN1,PHACTR1,W…
GO:BP	neuron migration	GO:0001764	0.00582769	2.2345	114	4434	56	15439	NDNF,PRKG1,KIF20B,GNRH1,APBB2,PLAA,FYN,MATN2,LRP12,CRK,PAFAH1B1,AXL,SATB2,NR4A2,SEMA3A,ASCL1,PEX13,PAX6,CHL1,SRF,SHTN1,GPM6A,FZD3,NTRK2,ASPM,KIAA0319,NDEL1,MYH10,NIPBL,NR2F2,CTNNB1,NTNG1,UNK,DAB1,ITGA3,PEX7,SDCCAG8,CCR4,LRIG2,NRP2,CAMK2A,MEF2C,ATOH1,FLRT2,DCLK1,PTK2,ASTN1,ELP3,PSEN1,ALKBH1,PHACTR1,PCM1,CNTN2,TBX20,GFRA3,NRG1
GO:BP	cellular response to peptide hormone stimulus	GO:0071375	0.00611253	2.21378	146	4434	68	15439	ADIPOQ,CRHBP,PIK3R1,APC,GLP1R,C2CD5,PHIP,KAT2B,RHOQ,TBC1D4,PTPN11,ENSCHIG00000010440,GHRHR,CAV2,ZFP36L1,CPEB1,TRIM72,ENPP1,SNX5,SORL1,GPLD1,NR4A2,PID1,RPE65,SOCS2,OTOP1,SLC39A14,FER,RAB31,OSBPL8,USO1,NCK1,DENND4C,KL,SRC,PTPN1,SESN3,INHBB,NDEL1,PRKCD,LEP,APPL2,FOXC2,BAIAP2L1,INSR,HDAC9,ATP2B1,NR1H4,CAMK2A,ZDHHC7,TRARG1,PDPK1,AHCYL1,GRB10,CPEB2,PTK2,SLC25A33,POU4F2,SOCS3,SOCS7,EIF4EBP2,PRKCI,CAV1,M…
GO:BP	divalent inorganic cation homeostasis	GO:0072507	0.00614522	2.21146	269	4434	112	15439	CXCL10,MAIP1,RAP1GDS1,GRIA1,ATG5,CACNB2,TGM2,ATP1B1,SLC10A7,SLC30A9,TMEM64,ATP2B2,GLP1R,ANK3,MCU,GRIN2B,CACNA1C,ATF4,LETM1,FYN,GRM1,MICU2,LYN,TRPC3,TMC8,SLC30A7,PKD2,AP3D1,CD19,ATP13A2,ATP2B3,SRI,LPAR1,GPR6,SLC30A4,TMEM178A,TRPA1,SLC30A1,SLC8A2,TSPOAP1,ENSCHIG00000013367,HTR2B,TRPM8,PDGFRA,CXCL11,SLC39A14,TRPM7,ATP2A2,CCL8,SMAD3,PRKCB,FFAR4,ADCY5,TRIM24,SNX10,APP,ATP2C1,CNR1,F2R,PRKCE,GPR12,KL,TN…
GO:BP	exocytosis	GO:0006887	0.00629628	2.20092	232	4434	99	15439	RAPGEF4,SYT11,VPS45,CRHBP,CACNB2,RAB27B,CFTR,EXOC2,VPS4B,RABGEF1,RAB11FIP2,RAB3B,BRAF,RAB21,SYT1,PRSS12,SYT16,NAPB,LYN,RIMS1,LIN7C,EXOC3L2,ENSCHIG00000010440,FBXL20,RAP1B,SNAP25,AP1G1,TRIM72,CASK,SYT7,ATP13A2,SLC4A8,CPLX2,ABCA12,SPHK2,ENSCHIG00000013367,ANXA1,STXBP5,SCAMP1,PLEK,RAB10,VSNL1,STAM,ATP2A2,CCL8,SYT4,EXOC8,ZP4,RAP1A,PRKCB,RAB31,CNR1,EXOC5,RSC1A1,MYH10,CADPS2,SYK,ENSCHIG00000017349,RAB3…
GO:BP	regulation of mRNA processing	GO:0050684	0.00630036	2.20063	81	4434	43	15439	KHDRBS1,SRPK1,RNF40,MBNL2,RBM24,CPSF6,PTBP1,DYRK1A,SAP18,IWS1,ZFP36L1,CPEB1,HMX2,NCBP1,CDK9,HNRNPU,SRSF9,DDX5,CCNT1,SON,SRSF7,NSRP1,ENSCHIG00000013372,CELF4,SRSF12,TIA1,RBM11,RBM23,VIRMA,CELF5,ZBTB7A,ENSCHIG00000022904,THRAP3,LEO1,CTR9,DHX36,CPSF7,AHCYL1,FAM172A,ENSCHIG00000026430,SRSF4,CDC73,SRSF2
GO:BP	regulation of ion transport	GO:0043269	0.00639522	2.19414	404	4434	158	15439	CXCL10,SYT11,ANO6,ATG5,CRHBP,HOMER1,CACNB2,ATP1B1,SLMAP,CFTR,KCNJ16,ANK3,RAB3B,CACNA2D1,KLHL24,SYT1,CACNA1C,ATF4,ATP8A1,FYN,THBS1,CLIC4,KCNS2,LYN,KCNA4,TRPC3,DLG1,AMIGO1,PKD2,UBQLN1,KCNC1,CNIH3,RANGRF,KCNJ2,CD19,NETO1,CASK,TNFRSF11A,NEDD4L,PLPP4,SYT7,KCND3,SRI,WDR1,KCNH8,SLC30A1,SPHK2,ENSCHIG00000017892,KCNE2,KCNJ3,KCNA3,KCNJ13,TCAF1,KCNIP4,CXCL11,HTR1B,KIF5B,ARL6IP5,CACNG3,SCN7A,SARAF,ENSCHIG000…
GO:BP	head development	GO:0060322	0.00652469	2.18544	461	4434	177	15439	ARL13B,LEF1,SLC1A2,SLC7A11,ATXN1L,PRKG1,SFRP2,HOOK3,LHX8,BRAF,SCYL2,RBPJ,FYN,ENSCHIG00000018293,HIF1A,SEMA6D,NIN,TYRO3,PTPN11,SALL1,ARHGAP35,CRK,PAFAH1B1,PAX9,TGFBR2,PPT1,GHRHR,UBA6,CRISPLD2,AXL,EMX2,RARB,TWSG1,MAPK3,PLEKHA1,HMX2,MAPK1,ENSCHIG00000026624,FRS2,KRAS,PTPRS,SOS1,NNAT,IHH,ARCN1,SEZ6L,SATB2,TCTN1,ZEB2,SPHK2,NR4A2,SOX9,NEUROD1,SLC4A10,PGAP1,CREB1,SEMA3A,RFX4,ASCL1,PDGFRA,NFIB,FANCC,PEX1…
GO:BP	heart morphogenesis	GO:0003007	0.00657567	2.18206	179	4434	80	15439	ARL13B,SFRP2,RBPJ,HIF1A,CERT1,YAP1,TGFBR2,ATF2,PKD2,ADGRG6,RARB,SMAD4,TGFBR3,NOTCH2,ARID2,SOS1,IHH,PARVA,SOX9,HTR2B,NPY1R,UBE4B,TMEM100,SRF,ANKRD1,ADAMTS1,SMAD3,PROX1,FOXC1,DSP,SOX4,MIB1,HES1,NSD2,PTCH1,HEY2,ENSCHIG00000017824,EYA1,TBX3,FAT4,CPE,NIPBL,CTNNB1,NPY2R,TGFBR1,FOXC2,INSR,MEGF8,IFT57,NRP2,GJA5,ZMPSTE24,MEF2C,ENSCHIG00000020204,BMP10,TP53,ENSCHIG00000015968,KIF3A,ACTC1,SIX1,BMPR2,SUFU,HE…
GO:BP	positive regulation of kinase activity	GO:0033674	0.00660752	2.17996	345	4434	138	15439	KITLG,ADIPOQ,EPHA4,IQGAP3,PSRC1,IGF1,LAMTOR3,PDGFC,CARTPT,HGF,ADRA2B,LCP2,PRLR,CACUL1,ITSN1,PRKAG2,MDFIC,VLDLR,GRM1,THBS1,ABI1,LYN,PTPN11,MMD,ERN1,TGFBR2,DLG1,PKD2,STRADA,CD19,CSF1,NEDD9,TNFRSF11A,PDGFA,MAPK3,ERCC6,MAPK1,FRS2,LPAR1,SASH1,AJUBA,DGKZ,ZEB2,SLC8A2,UNC119,SPAG9,EGFR,MAP3K13,PIK3CA,ECT2,MAP3K20,HTR2B,DDR2,GADD45A,MAP3K12,PDGFRA,MAP3K5,ACSL1,MAP3K21,CCDC88A,MRE11,PROX1,EMP2,AFAP1L2,VEGF…
GO:BP	protein-containing complex subunit organization	GO:0043933	0.00764918	2.11639	1097	4434	381	15439	CCT8,CLDN1,ANP32E,PSRC1,ANO6,CLEC7A,SLAIN2,SLU7,STX17,MTRF1L,SLC1A2,AHCTF1,PDGFC,DENR,CLIP3,ANKRA2,MITF,HLA-DRA,APOM,RIPOR2,UBN1,RRN3,SPTY2D1,TSPYL5,APC,HCN1,PRLR,H1-6,H1-3,NUP153,VPS4B,SEH1L,TRAF3IP1,EIF3A,AGO3,MCU,SVIP,ENSCHIG00000024752,BBS10,CPSF6,TIAM1,EPS8,CYFIP2,ETF1,DYRK1A,JMY,GMFB,NIN,CYRIA,NACC2,SURF1,KCTD12,NAPB,KCNS2,ARFGEF1,AGO2,RIMS1,ACSL3,KCNA4,YAP1,DYRK3,KCTD3,SSH1,PTPN11,TMC8,NCK…
GO:BP	gland development	GO:0048732	0.00793617	2.10039	276	4434	114	15439	IQGAP3,LEF1,FGF7,TGM2,ONECUT2,HGF,DDR1,POLB,BRAF,RBPJ,HIF1A,IGFBP5,CYP7B1,KDM5B,SALL1,ARHGAP35,UBE3A,DAG1,TGFBR2,GHRHR,PKD2,ZDHHC21,HOXB9,CSF1,JARID2,TNFRSF11A,SMAD4,TWSG1,MAPK3,MAPK1,NOTCH2,HOXA3,FRS2,SEC63,PAX8,SOX9,BTBD7,TP63,PIK3CA,ENSCHIG00000013367,CREB1,SEMA3A,SOCS2,ASCL1,PDGFRA,NFIB,PAX6,SRF,ARID5B,E2F8,SMAD3,PROX1,RXFP1,FOXC1,RREB1,ASH1L,HES1,PTCH1,LATS1,TNFSF11,SRC,MAFB,CEBPB,TBX3,CEBPA…
GO:BP	cellular response to carbohydrate stimulus	GO:0071322	0.00817035	2.08776	62	4434	35	15439	SLC9B2,CFTR,RAB11FIP2,CCDC186,HIF1A,ERN1,ZFP36L1,SRI,PIK3CA,KLF7,SLC39A14,VSNL1,GPR27,PRKCB,SOX4,ANO1,PRKAA2,ADCY5,PIM3,EPHA5,EFNA5,PRKCE,ICAM1,ARRB1,MAPK13,ZBTB20,CALCRL,KCNB1,SELENOT,NR1H4,CYP7A1,PPP3CB,PRKACA,C2CD2L,STX4
GO:BP	platelet-derived growth factor receptor signaling pathway	GO:0048008	0.00855035	2.06802	48	4434	29	15439	ADIPOQ,PDGFC,MYOCD,F3,NR4A3,CBL,PTPN11,PTPRJ,PDGFA,PLEKHA1,NRP1,ENSCHIG00000017892,PDGFRA,LOX,SMPD3,ARID5B,FER,ZFAND5,SRC,PTPN1,IQGAP1,ENSCHIG00000013272,NDRG4,PLAT,LRIG2,IFT20,SGPL1,HIP1,PDGFRB
GO:BP	peptidyl-tyrosine modification	GO:0018212	0.00885319	2.0529	265	4434	110	15439	KITLG,EPHA4,IGF1,FGF7,SOCS5,TNFSF18,PDGFC,INPP5F,HGF,SFRP2,PRLR,DDR1,DYRK1A,FYN,TYRO3,MERTK,ABI1,LYN,WEE1,PTPN11,SAMSN1,MET,TEC,AXL,NEDD9,MAPK3,ERCC6,TWF1,RAP2B,ENSCHIG00000015151,NRP1,SH2B3,CHMP6,UNC119,ENSCHIG00000017892,RICTOR,EGFR,EPHA3,DDR2,ENSCHIG00000022600,PDGFRA,KDR,PECAM1,FER,EPHA6,AFAP1L2,HES1,EPHA5,EFNA5,APP,NTRK2,MUSK,TTK,ZAP70,PRKCE,SRC,PTPN1,ENSCHIG00000027047,ENPP2,IL7,PRKCD,PTK2B…
GO:BP	regulation of MAPK cascade	GO:0043408	0.00885382	2.05287	466	4434	178	15439	KITLG,ADIPOQ,EPHA4,IQGAP3,IGF1,LAMTOR3,ITCH,CARTPT,HGF,PAQR3,ADRA2B,SFRP2,GAREM1,ACKR3,DUSP4,BRAF,MDFIC,DUSP6,LMO3,PJA2,GRM1,STYX,THBS1,LYN,PTPN11,PAFAH1B1,ERN1,DAG1,RAP1B,DLG1,FN1,HIPK3,CAV2,PTPRJ,TNFRSF11A,SMAD4,PDGFA,MAPK3,ERCC6,MAPK1,NOTCH2,FRS2,TIMP3,LPAR1,SASH1,AJUBA,STK3,SORL1,SH2B3,ZEB2,SPAG9,AKAP13,EGFR,MAP3K13,MAP3K20,HTR2B,GADD45A,MAP3K12,PTPRR,PDGFRA,KDR,HAVCR2,MAP3K5,ARL6IP5,MAP3K21,…
GO:BP	stem cell differentiation	GO:0048863	0.00892918	2.04919	150	4434	69	15439	KITLG,PRICKLE1,MYOCD,RBM24,RBPJ,HIF1A,YAP1,SETD6,FN1,PWP1,SOX5,SNAI2,JARID2,SMAD4,MAPK3,MAPK1,HNRNPU,ZNF281,CORO1C,ZEB2,SOX9,TP63,HTR2B,SEMA3A,ASCL1,PDGFRA,UFL1,SHC4,RDH10,KBTBD8,SRF,FOXC1,GPM6A,HES1,MLLT3,EPCAM,MSI2,ENSCHIG00000022261,SETD2,CTNNB1,GBX2,FOXC2,GDNF,PTN,EDN1,RUNX2,SOX21,NRP2,MTF2,MEF2C,TP53,DHX36,ZFP36L2,KLHL12,SFRP1,RET,FZD1,FAM172A,SOX6,TGFB2,KIT,JAG1,NSUN2,SEMA3C,BMP7,NOLC1,ALDH…
GO:BP	positive regulation of neurogenesis	GO:0050769	0.00907379	2.04221	268	4434	111	15439	NDNF,RETREG3,BMP5,KIF20B,ADRA2B,BRAF,RAB21,SYT1,JADE2,PLAA,VLDLR,FYN,HIF1A,NIN,LYN,RIMS1,ARHGAP35,MMD,PAFAH1B1,FN1,STMN2,BDNF,BEND6,CSF1,NEDD4L,ENSCHIG00000015151,CAMK1D,SS18L1,TGIF2,CAPRIN1,ZEB2,SPAG9,EPHA3,BCL6,MAP3K13,ECT2,NEUROD1,SEMA3A,SOCS2,ASCL1,UFL1,PAX6,SRF,SYT4,RAP1A,NCOA1,PROX1,SHTN1,LIMK1,CDON,HES1,CAPRIN2,EP300,EFNA5,NCK1,FZD3,NTRK2,TMEM30A,SETX,ZEB1,ASPM,NUMBL,NIPBL,CTNNB1,PTK2B,SYT…
GO:BP	negative regulation of cellular protein metabolic process	GO:0032269	0.00949741	2.02239	746	4434	269	15439	RIDA,ADIPOQ,EPHA4,ECM1,DHCR24,LEF1,TNFAIP8,NCOA7,ATG5,PAIP2B,SOCS5,ITCH,ENSCHIG00000024446,PKIA,TRIM21,YOD1,MYOCD,ENC1,INPP5F,HGF,PAQR3,CAMLG,APC,SFRP2,RYBP,RBM24,TRAF3IP1,RABGEF1,CPEB3,AGO3,IKBKB,DUSP4,SVIP,GLMN,PRKAG2,DUSP6,LMO3,LARP1,PURA,KDM4B,C9ORF72,PLAA,RECK,USP25,CD109,FYN,UBE2J1,SYNCRIP,KAT2B,STYX,IGFBP5,THBS1,BIRC6,WAC,UBR5,LYN,AGO2,RC3H1,GLG1,TIMP2,PPM1E,PAFAH1B1,IREB2,DAG1,SAMSN1,DLG1…
GO:BP	posttranscriptional regulation of gene expression	GO:0010608	0.0101711	1.99263	318	4434	128	15439	RIDA,KHDRBS1,PAIP2B,MYOCD,ENC1,PDE12,ANGEL2,RBM24,CPEB3,AGO3,RBM4B,TENT5C,LARP1,PURA,ETF1,SYNCRIP,IGFBP5,THBS1,YTHDF1,AGO2,RC3H1,DPH1,MEIOC,IREB2,UHMK1,ENSCHIG00000010681,PLD1,ZFP36L1,CPEB1,EIF5A2,EIF4E,KHSRP,NCBP1,AJUBA,PUM2,CAPRIN1,HNRNPU,FXR2,DDX5,EGFR,NSUN3,PRKRA,CNOT6L,CNOT8,TENT2,PUS10,SRP9,KBTBD8,SOX4,GSPT1,MAEL,LARP4,CAPRIN2,TNRC6B,APP,NCK1,ILF3,ATG14,TIA1,RC3H2,LARP4B,TOB1,TERT,RBMS3,GRM…
GO:BP	positive regulation of neuron projection development	GO:0010976	0.0103721	1.98413	137	4434	64	15439	NDNF,RETREG3,BMP5,BRAF,RAB21,SYT1,PLAA,VLDLR,FYN,NIN,LYN,RIMS1,ARHGAP35,PAFAH1B1,FN1,STMN2,BDNF,NEDD4L,ENSCHIG00000015151,CAMK1D,SS18L1,CAPRIN1,ZEB2,EPHA3,MAP3K13,SRF,SYT4,RAP1A,LIMK1,CAPRIN2,EP300,EFNA5,NCK1,NTRK2,TMEM30A,SETX,PTK2B,SYT17,FGFR1,NTRK3,MEGF8,PTN,MACF1,CNTN1,NEFL,FUT9,MAPK6,PLA2G3,BMPR2,PTK7,RET,LPAR3,RAPGEF1,CDH4,POU4F2,SCARF1,MAPT,LLPH,PSEN1,PRKCI,SMURF1,BMP7,TMEM106B,MAP2K2
GO:BP	positive regulation of neuron differentiation	GO:0045666	0.0117368	1.93045	198	4434	86	15439	NDNF,RETREG3,BMP5,ADRA2B,BRAF,RAB21,SYT1,PLAA,VLDLR,FYN,NIN,LYN,RIMS1,ARHGAP35,MMD,PAFAH1B1,FN1,STMN2,BDNF,BEND6,NEDD4L,ENSCHIG00000015151,CAMK1D,SS18L1,TGIF2,CAPRIN1,ZEB2,SPAG9,EPHA3,BCL6,MAP3K13,ECT2,NEUROD1,SOCS2,SRF,SYT4,RAP1A,NCOA1,PROX1,LIMK1,CDON,CAPRIN2,EP300,EFNA5,NCK1,NTRK2,TMEM30A,SETX,ZEB1,PTK2B,SYT17,FGFR1,NTRK3,DAB1,MEGF8,PTN,MACF1,CNTN1,MEF2C,NEFL,FUT9,BNIP2,MAPK6,PLA2G3,BMPR2,PTK7…
GO:BP	negative regulation of transforming growth factor beta receptor signaling pathway	GO:0030512	0.0121162	1.91663	58	4434	33	15439	ASPN,ONECUT2,ENSCHIG00000008899,CD109,PRDM16,GLG1,CHST11,CAV2,TGFB1I1,SNX25,PMEPA1,VEPH1,LEMD3,FBN1,LTBP1,SPRED2,BAMBI,CIDEA,ZBTB7A,ZNF451,ADAM17,TP53,IL17RD,PDPK1,PBLD,FBN2,SKI,SMURF2,SPRED1,CAV1,SMAD7,SMURF1,HTRA3
GO:BP	cellular chemical homeostasis	GO:0055082	0.012295	1.91027	435	4434	167	15439	CXCL10,ATP6V1A,MAIP1,SLC9B2,RAP1GDS1,SLC4A4,GRIA1,ATG5,CACNB2,TGM2,ATP1B1,SLC10A7,CARTPT,PIK3R1,CFTR,SLC30A9,TMEM64,ATP2B2,GLP1R,RAB11FIP2,CCDC186,MCU,GRIN2B,CACNA1C,ATF4,LETM1,ARF1,FYN,GRM1,HIF1A,CLIC4,MICU2,LYN,ATP6V0A2,TRPC3,ERN1,UBE3A,IREB2,SLC30A7,PPT1,PKD2,AP3D1,RAB39A,CD19,SMAD4,MAPK3,MAPK1,ATP13A2,ATP2B3,SRI,SLC4A8,LPAR1,ENPP1,GPR6,SLC30A4,TMEM178A,TRPA1,SLC30A1,SLC8A2,TSPOAP1,PIK3CA,SLC4…
GO:BP	regulation of mitotic cell cycle	GO:0007346	0.0126558	1.89771	328	4434	131	15439	PSRC1,IGF1,DCUN1D3,KIF20B,KIF11,APC,ANGEL2,VPS4B,HECA,MEIS2,NACC2,RAD21,PTPN11,MAP9,MEIOC,ERCC3,DLG1,ATF2,PKD2,DTL,CAV2,ZFP36L1,CCSAP,KMT2E,EIF4E,HNRNPU,CTDSPL,EGFR,CHMP2B,MAP3K20,NABP1,GADD45A,GNAI1,CTDSP2,ASCL1,INTS13,ANXA1,JADE1,SMPD3,RAD51C,NDC80,PSMG2,ADAMTS1,SMAD3,ATAD5,FOXC1,DYNC1LI1,SOX4,AFAP1L2,STOX1,CDKN1C,PKN2,HES1,PIM3,APP,FZD3,PTCH1,TTK,TMOD3,RB1,RDX,HECW2,CYLD,TAOK1,SPDL1,CTNNB1,RIO…
GO:BP	regulation of epithelial cell proliferation	GO:0050678	0.0130481	1.88445	241	4434	101	15439	CLDN1,IQGAP3,ECM1,IGF1,FGF7,BMP5,KLF9,SFRP2,PPARD,F3,SP1,CD109,THBS1,CYP7B1,SGPP2,YAP1,KDM5B,DLG1,NRAS,SNAI2,WDR48,FOXP1,CAV2,ZFP36L1,CASK,TCF7L2,NOTCH2,CDK6,FRS2,PTPRK,SOX9,EGFR,TP63,A4GNT,HTR2B,KDR,NFIB,PAX6,SMAD3,PROX1,VHL,RREB1,STOX1,CDKN1C,HES1,PTCH1,MCC,RB1,EYA1,VASH2,NF1,NR2F2,PRKD1,CTNNB1,MYDGF,FGFR1,LEP,TGFBR1,JCAD,PYGO2,DLX6,VDR,IFT57,PTN,FOXE3,WDR77,PGR,MEF2C,TNFAIP3,SIX4,ADAM17,OSR2,K…
GO:BP	circadian rhythm	GO:0007623	0.0142886	1.84501	130	4434	61	15439	NCOA2,KLF9,SFPQ,RBM4B,NAMPT,ATF4,DYRK1A,GFPT1,KLF10,UBE3A,BDNF,PER3,TNFRSF11A,GPR176,HNRNPU,RAI1,CREB1,MTTP,PROX1,KDM2A,PRKAA2,EP300,EGR1,MAPK9,NTRK2,NFIL3,RORB,PPP1CB,SETX,FBXL3,FBXW11,HNF4A,PER1,NTRK3,HTR7,KCNA2,THRAP3,TARDBP,FBXW7,TP53,CDK1,SIAH2,PHLPP1,ENSCHIG00000022992,PPARGC1A,CRTC1,PROKR2,ENSCHIG00000017357,RELB,CSNK1D,TOP2A,CIPC,TOP1,LGR4,NOCT,CRY1,PPARA,NRIP1,CLOCK,ADCY1,MTOR
GO:BP	response to steroid hormone	GO:0048545	0.0142886	1.84501	130	4434	61	15439	CNOT2,LEF1,NR3C1,NCOA2,KLF9,GNRH1,LMO3,UBR5,CYP7B1,YAP1,CREBRF,UBE3A,GHRHR,FOXP1,ZFP36L1,EIF4E,UBA5,HNRNPU,DDX5,AKAP13,TP63,RBFOX2,ANXA1,UFL1,DNAAF4,HNF4G,CASP9,EP300,PPARGC1B,LATS1,SRC,FAM107A,ZBTB7A,PER1,TFPI,PGR,ATP1A2,FBXO32,ESRRG,DAB2,DDIT4,ZFP36L2,TFAP4,SFRP1,HEYL,KMT2D,SLIT2,TGFB2,POU4F2,WBP2,NCOR1,TMF1,CAV1,CRY1,IL10,URI1,PPARA,BMP7,CLOCK,FOXH1,KANK2
GO:BP	response to stimulus	GO:0050896	0.0148923	1.82704	6458	4434	1975	15439	CD36,KITLG,CXCL10,OPRK1,ARL13B,ATP6V1A,RABL3,CLDN1,MASP1,ADIPOQ,NCEH1,CLDN18,RAPGEF4,CXCR4,EPHA4,RHBDD1,KHDRBS1,IQGAP3,SYT11,PGLYRP3,ECM1,GDAP2,ELAPOR1,COL11A1,DHCR24,TUT4,TM2D1,LURAP1,FIGNL1,NAPEPLD,POT1,ANO6,PRICKLE1,CNOT2,USP15,IGF1,NUAK1,ABCC9,KLRK1,CLEC7A,NDNF,LEF1,TBCK,SLC9B2,LAMTOR3,ARAP2,TMEM33,GABRG1,GABRA2,SULT1B1,ARHGAP24,MAPK10,NR3C1,G3BP1,GRIA1,SLU7,GABRA6,ARRDC3,ASPN,NCOA7,GJA1,ATG5…
GO:BP	negative regulation of nervous system development	GO:0051961	0.0149651	1.82492	185	4434	81	15439	EPHA4,SPART,RAP1GAP2,INPP5F,PAQR3,GNRH1,TRAF3IP1,HOOK3,DDX6,MEIS1,STMN2,BDNF,THRB,MYLIP,EIF4E,CTNNA1,PTPRS,LPAR1,ENSCHIG00000015151,SORL1,SOX9,PTPN9,NEPRO,MAP2,SEMA3A,RFX4,ASCL1,LDLR,MTMR2,PAX6,MIB1,GFI1,HES1,HOXA2,FSTL4,APP,RAB29,ASPM,KIAA0319,ZNF536,CTNNB1,EPHA7,APPL2,PRKCSH,BMERB1,DAB1,PTN,LRIG2,CIB1,DAAM2,TBX6,TP53,BAG5,SUFU,SYNGAP1,TNFRSF21,CTSC,EFNA1,PPP3CA,SLIT2,SPOCK1,RYK,PRKACA,BRINP1,NK…
GO:BP	embryo development ending in birth or egg hatching	GO:0009792	0.0149688	1.82481	509	4434	191	15439	ARL13B,MEOX2,PRICKLE1,CNOT2,IGF1,LEF1,NMT1,RRN3,KIF20B,UBR3,SFRP2,TMEM107,TRAF3IP1,SBDS,GLMN,ARNT,RBPJ,HIF1A,CERT1,PAX7,BIRC6,LPAR6,PCDH8,ABI1,ARHGAP35,TGFBR2,DLG1,CHST11,PKD2,PCSK5,RSPO3,SRSF1,HOXB9,FOXP1,ZFP36L1,C6,SMAD4,PLPP4,MAPK1,NOTCH2,HOXA3,SMIM14,MGAT1,STK3,IHH,SLC30A1,SATB2,TCTN1,CMTM3,ZEB2,VASP,RICTOR,PTPRR,PDGFRA,KIAA1217,RDH10,MMP16,ADM,PAX6,TMEM100,NSRP1,COPS3,KBTBD8,TASOR,SRF,E2F8,S…
GO:BP	epithelial cell migration	GO:0010631	0.0150676	1.82196	216	4434	92	15439	MEOX2,FGF7,PPARD,ETS1,SP1,HIF1A,THBS1,CYP1B1,AMOTL1,PLEKHG5,PTPN11,TGFBR2,MET,RHOJ,FOXP1,SASH1,LTB4R2,NRP1,PIK3C2A,CORO1C,GPLD1,ZEB2,SOX9,PTPRG,GADD45A,SEMA3A,PTPRR,KDR,ANXA1,PECAM1,SRF,PROX1,VHL,RREB1,EMP2,SVBP,PKN2,PAXIP1,ANLN,MCC,PRKCE,ITGB1,SRC,ENPP2,NF1,NR2F2,PTK2B,P2RX4,FGFR1,ENSCHIG00000022037,TGFBR1,JCAD,FOXC2,HDAC9,CDH5,WDPCP,CIB1,ANGPT4,MEF2C,TEK,BMP10,ADAM17,FBXW7,SPARC,BMPR2,PTPRM,PDP…
GO:BP	ameboidal-type cell migration	GO:0001667	0.0152431	1.81693	288	4434	117	15439	KITLG,MEOX2,GJA1,FGF7,PPARD,ETS1,BRAF,SP1,HIF1A,THBS1,CYP1B1,AGO2,AMOTL1,PLEKHG5,PTPN11,PAFAH1B1,TGFBR2,FN1,MET,RHOJ,FOXP1,SASH1,LTB4R2,NRP1,PIK3C2A,CORO1C,GPLD1,ZEB2,SOX9,ENSCHIG00000017892,PTPRG,HTR2B,DDR2,GADD45A,SEMA3A,PTPRR,KDR,MACIR,ANXA1,PECAM1,SRF,ARID5B,FER,PROX1,VHL,RREB1,EMP2,SVBP,PKN2,PAXIP1,ANLN,ZFAND5,MCC,PRKCE,ITGB1,SRC,ENPP2,NF1,NR2F2,PTK2B,P2RX4,FGFR1,GBX2,APPL2,ENSCHIG0000002203…
GO:BP	chordate embryonic development	GO:0043009	0.0152566	1.81654	500	4434	188	15439	ARL13B,MEOX2,PRICKLE1,CNOT2,IGF1,LEF1,NMT1,RRN3,KIF20B,UBR3,SFRP2,TMEM107,TRAF3IP1,SBDS,GLMN,ARNT,RBPJ,HIF1A,CERT1,PAX7,BIRC6,LPAR6,PCDH8,ABI1,ARHGAP35,TGFBR2,DLG1,CHST11,PKD2,PCSK5,RSPO3,SRSF1,HOXB9,FOXP1,ZFP36L1,C6,SMAD4,PLPP4,MAPK1,NOTCH2,HOXA3,SMIM14,MGAT1,STK3,IHH,SLC30A1,SATB2,TCTN1,CMTM3,ZEB2,VASP,PTPRR,PDGFRA,KIAA1217,RDH10,MMP16,ADM,PAX6,TMEM100,NSRP1,COPS3,KBTBD8,TASOR,SRF,E2F8,SMAD3,NC…
GO:BP	peptidyl-tyrosine phosphorylation	GO:0018108	0.0156109	1.80657	262	4434	108	15439	KITLG,EPHA4,IGF1,FGF7,SOCS5,TNFSF18,PDGFC,INPP5F,HGF,SFRP2,PRLR,DDR1,DYRK1A,FYN,TYRO3,MERTK,ABI1,LYN,WEE1,PTPN11,SAMSN1,MET,TEC,AXL,NEDD9,MAPK3,ERCC6,TWF1,RAP2B,ENSCHIG00000015151,NRP1,SH2B3,CHMP6,UNC119,ENSCHIG00000017892,RICTOR,EGFR,EPHA3,DDR2,ENSCHIG00000022600,PDGFRA,KDR,PECAM1,FER,EPHA6,AFAP1L2,HES1,EPHA5,EFNA5,APP,NTRK2,MUSK,TTK,ZAP70,PRKCE,SRC,PTPN1,ENSCHIG00000027047,ENPP2,IL7,PRKCD,PTK2B…
GO:BP	morphogenesis of a branching epithelium	GO:0061138	0.0156862	1.80448	152	4434	69	15439	LEF1,FGF7,TGM2,HGF,SFRP2,DDR1,GREB1L,CLIC4,YAP1,KDM5B,DAG1,TGFBR2,DLG1,MET,PKD2,RSPO3,HHIP,CSF1,SMAD4,FRS2,KRAS,PAX8,IHH,SOX9,BTBD7,TP63,SEMA3A,KDR,RDH10,ADM,SRF,NPNT,PROX1,PTCH1,SRC,EYA1,FZD5,TBX3,FAT4,GNA13,CTNNB1,STK4,FGFR1,GBX2,FOXC2,GDNF,VDR,EDN1,PGR,FEM1B,SIX4,SIX1,SFRP1,SLIT2,GZF1,SPINT2,SOCS3,HOXB7,AREG,DCHS1,LGR4,SEMA3C,IL10,FGF10,TBX20,BMP7,VANGL2,WT1,WNT2B
GO:BP	cellular response to insulin stimulus	GO:0032869	0.0158844	1.79903	117	4434	56	15439	ADIPOQ,PIK3R1,APC,C2CD5,PHIP,KAT2B,RHOQ,TBC1D4,PTPN11,ENSCHIG00000010440,GHRHR,CAV2,ZFP36L1,CPEB1,TRIM72,ENPP1,SNX5,SORL1,GPLD1,PID1,RPE65,OTOP1,SLC39A14,FER,RAB31,OSBPL8,USO1,NCK1,DENND4C,KL,PTPN1,SESN3,INHBB,NDEL1,PRKCD,LEP,APPL2,FOXC2,BAIAP2L1,INSR,HDAC9,ATP2B1,NR1H4,ZDHHC7,TRARG1,PDPK1,GRB10,CPEB2,SLC25A33,POU4F2,SOCS3,SOCS7,EIF4EBP2,PRKCI,WDTC1,PDK4
GO:BP	tissue remodeling	GO:0048771	0.0158844	1.79903	117	4434	56	15439	CLDN18,ATG5,CARTPT,MITF,TMEM64,RBPJ,HIF1A,IGFBP5,RSPO3,AXL,TNFRSF11A,LIPA,SYT7,NOTCH2,HOXA3,ENSCHIG00000015151,IHH,PLEKHM1,DDR2,IAPP,HTR1B,CRB1,FOXC1,SNX10,PPARGC1B,F2R,TNFSF11,SRC,IL7,CTNNB1,PTK2B,SYK,LEP,FOXC2,VDR,PTN,TFRC,UMOD,GJA5,MEF2C,TP53,SUCO,BMPR2,SFRP1,PPP3CA,RAB3D,ACVRL1,LGR4,SEMA3C,CAV1,FGF10,INPP5D,EFNA2,PDK4,GPNMB,BAK1
GO:BP	connective tissue development	GO:0061448	0.0165109	1.78223	191	4434	83	15439	ECM1,ARRDC3,EBF2,SPART,ADAMTS12,SFRP2,PPARD,WNT5B,HIF1A,PAX7,PTPN11,GLG1,TGFBR2,ATF2,CHST11,SOX5,SNAI2,TRIP11,RARB,CSF1,BMPR1B,ZNF516,MEX3C,MAPK3,SNX19,HOXA3,IHH,SORL1,SATB2,SOX9,PIK3CA,LNPK,KLF7,LOX,SMAD5,NFIB,SLC39A14,BPNT2,MMP13,SMPD3,SRF,ARID5B,SMAD3,RXFP1,PAXIP1,HOXC4,ZEB1,ZBTB16,CTNNB1,FGFR1,LEP,TGFBR1,MAF,FOXC2,EDN1,RUNX2,ZMPSTE24,ITGB8,NR1H4,MEF2C,BMP10,OSR2,BARX2,BMPR2,PPARGC1A,SPTLC2,SO…
GO:BP	regulation of synaptic plasticity	GO:0048167	0.0174711	1.75768	112	4434	54	15439	EPHA4,GRIA1,MPP2,SHANK2,RIN1,BRAF,ATF4,YTHDF1,BAIAP2,ENSCHIG00000010440,SNAP25,BDNF,ABHD6,NETO1,SYT7,MAPK1,SYP,KRAS,CPLX2,SLC8A2,SLC4A10,SRF,GRID2,APP,NTRK2,FAM107A,ENSCHIG00000021578,GRM5,SYT12,PTN,GRIN2A,KCNB1,STX3,KCNJ10,CAMK2A,MEF2C,CALB1,SYNGAP1,YWHAG,STXBP1,ENSCHIG00000017357,PSEN1,EIF4EBP2,CNTN2,TNR,JPH3,STX4,PRRT1,PAIP2,GRIK2,NR2E1,HRH2,ADCY1,GIPC1
GO:BP	cellular homeostasis	GO:0019725	0.0181358	1.74146	544	4434	202	15439	CXCL10,ATP6V1A,MAIP1,ANO6,SLC9B2,RAP1GDS1,SLC4A4,GRIA1,ATG5,TXNDC16,CACNB2,TGM2,ATP1B1,SLC10A7,CARTPT,PIK3R1,CFTR,SLC30A9,TMEM64,ATP2B2,GLP1R,IDE,RAB11FIP2,CCDC186,MCU,GRIN2B,CACNA1C,ATF4,LETM1,TXNDC15,ARF1,FYN,GRM1,HIF1A,TYRO3,CLIC4,MICU2,LYN,ATP6V0A2,TRPC3,ERN1,UBE3A,IREB2,SLC30A7,PPT1,PKD2,AP3D1,RAB39A,GCLC,CD19,SMAD4,MAPK3,MAPK1,ATP13A2,ATP2B3,SRI,SLC4A8,CLCN3,LPAR1,ENPP1,GPR6,SLC30A4,TMEM178…
GO:BP	regulation of system process	GO:0044057	0.0195145	1.70964	301	4434	121	15439	OPRK1,ADIPOQ,IGF1,ABCC9,GJA1,CRHBP,HOMER1,CACNB2,ATP1B1,MYOCD,CARTPT,NUP155,PRKG1,ADRA2B,DSG2,CACNA2D1,CACNA1C,ENSCHIG00000018293,GRM1,GCH1,IGFBP5,PTPN11,TRPC3,ENSCHIG00000011448,DLG1,RANGRF,KCNJ2,THRB,SMAD4,KCND3,SRI,TWF1,SLC8A2,CACNG5,KCNE2,NEUROD1,SEMA3A,DOCK4,MTPN,MTMR2,ADM,ATP2A2,TMEM100,SRF,NPNT,DSP,CELF4,EMP2,WNK1,APP,SLC1A1,HEY2,F2R,PBX3,TMEM65,INHBB,IRX5,GNAO1,SHANK1,STK39,MEF2A,FGF12,P2…
GO:BP	regulation of cytoskeleton organization	GO:0051493	0.0197853	1.70366	390	4434	151	15439	PSRC1,SLAIN2,CLIP3,PIK3R1,KIF11,APC,CD2AP,VPS4B,CEP76,TRAF3IP1,PPFIA1,BRAF,EPS8,CEP70,CYFIP2,C9ORF72,DYRK1A,KAT2B,JMY,GMFB,NIN,CYRIA,ARFGEF1,SSH1,MAP9,ARHGAP35,ACTG1,BAIAP2,PPM1E,CRK,PAFAH1B1,NCKAP1,DLG1,CAPZA1,MET,TRIM36,STMN2,RANGRF,RASA1,SPIRE1,SMAD4,CCSAP,NOTCH2,TWF1,AP1AR,WDR1,LPAR1,TMOD2,PLEKHH2,SPTBN1,NRP1,HNRNPU,VASP,ENSCHIG00000017892,RICTOR,TPPP,AKAP13,HDGFL3,CHMP2B,EPHA3,ECT2,PRUNE1,GN…
GO:BP	protein localization to cell periphery	GO:1990778	0.0201573	1.69557	223	4434	94	15439	ADIPOQ,DPP10,GPR158,CNST,ATP1B1,CLIP3,PIGW,PIK3R1,SLMAP,LYPD1,EPB41L3,IKBKB,ANK3,PPFIA1,C2CD5,RHOQ,ACSL3,RABEP1,ENSCHIG00000010440,DLG1,SNAP25,RANGRF,PICALM,FAM126A,MRAP2,SPTBN1,ABCA12,PTPN9,EGFR,PID1,EPHA3,GNAI1,KIF5B,RILPL2,FCHO2,CACNG3,RAP1A,EPB41L2,CCDC88A,RAB31,CDH2,GGA2,EMP2,GOLGA7,DENND4C,PTCH1,EXOC5,ADAM10,ITGB1,RDX,RSC1A1,NECTIN3,GOLPH3,SEC23A,SEC16A,ITGA3,STAC3,ENSCHIG00000017940,CIB1,G…
GO:BP	regulation of exocytosis	GO:0017157	0.0216584	1.66437	126	4434	59	15439	RAPGEF4,CACNB2,RAB27B,CFTR,VPS4B,RABGEF1,RAB3B,BRAF,RAB21,SYT1,NAPB,LYN,ENSCHIG00000010440,FBXL20,RAP1B,AP1G1,CASK,SYT7,ATP13A2,SLC4A8,CPLX2,SPHK2,ENSCHIG00000013367,ANXA1,VSNL1,STAM,ATP2A2,RAP1A,PRKCB,CNR1,RSC1A1,CADPS2,SYK,RAB3C,STX1B,ENSCHIG00000022037,SYT5,FGG,ITGAM,STXBP5L,LRRK2,RAC2,CAMK2A,PLA2G3,PDPK1,RAB3D,SDC1,STXBP1,DOC2B,CACNA1D,SNAPIN,RALA,PCLO,STX4,SNX4,APBA1,ADCY1,CACNA1A,GIPC1
GO:BP	protein localization to plasma membrane	GO:0072659	0.0219085	1.65939	195	4434	84	15439	ADIPOQ,DPP10,GPR158,CNST,ATP1B1,CLIP3,PIGW,PIK3R1,SLMAP,LYPD1,EPB41L3,IKBKB,ANK3,PPFIA1,C2CD5,RHOQ,ACSL3,ENSCHIG00000010440,DLG1,RANGRF,PICALM,FAM126A,MRAP2,SPTBN1,ABCA12,PTPN9,EGFR,PID1,EPHA3,KIF5B,RILPL2,FCHO2,RAP1A,CCDC88A,RAB31,CDH2,GGA2,EMP2,GOLGA7,DENND4C,PTCH1,EXOC5,ITGB1,RDX,RSC1A1,NECTIN3,GOLPH3,SEC23A,SEC16A,ITGA3,STAC3,ENSCHIG00000017940,CIB1,SYTL2,LDLRAP1,STX3,VAMP3,TNIK,TMEM59,MACF1,…
GO:BP	proteasome-mediated ubiquitin-dependent protein catabolic process	GO:0043161	0.0227589	1.64285	215	4434	91	15439	PRICKLE1,BBS7,UBR1,SOCS5,YOD1,TRIM25,CAMLG,UBR3,RYBP,FOXF2,FBXL19,RNF216,SVIP,GLMN,TMEM129,PLAA,UBE2J1,STYX,WAC,EDEM3,UBQLN1,RNF185,KCTD13,FBXO33,TRIM72,EDEM1,UBR2,NEDD4L,FBXO22,RCHY1,UFL1,PELI1,TRIB2,UBE4B,KLHL20,KLHL42,MAPK9,UBE2G2,XPO1,FBXL3,WWP1,N4BP1,SIRT2,SPOPL,TLK2,DNAJC10,FBXW11,RNF180,PPP2R5C,CTNNB1,FOXRED2,TMEM67,ARRB1,CLEC16A,LTN1,LRRK2,RNF4,FAF2,ENSCHIG00000017291,DERL1,FBXW7,DAB2,BAG…
GO:BP	response to insulin	GO:0032868	0.0229522	1.63918	137	4434	63	15439	ADIPOQ,PIK3R1,APC,C2CD5,PHIP,KAT2B,RHOQ,TBC1D4,PTPN11,ENSCHIG00000010440,GHRHR,CAV2,ZFP36L1,CPEB1,TRIM72,ENPP1,SNX5,SORL1,GPLD1,PID1,RPE65,OTOP1,SLC39A14,FER,RAB31,OSBPL8,USO1,EGR1,NCK1,DENND4C,KL,PTPN1,SESN3,INHBB,NDEL1,PRKCD,EPM2AIP1,LEP,APPL2,FOXC2,BAIAP2L1,SORT1,INSR,HDAC9,ATP2B1,VPS13C,NR1H4,ZDHHC7,TRARG1,PDPK1,GRB10,CPEB2,SLC25A33,POU4F2,MEAK7,SOCS3,SOCS7,EIF4EBP2,PRKCI,CRY1,WDTC1,PDK4,MTOR
GO:BP	regulated exocytosis	GO:0045055	0.0229522	1.63918	137	4434	63	15439	RAPGEF4,SYT11,CRHBP,CACNB2,RABGEF1,RAB11FIP2,BRAF,SYT1,NAPB,LYN,RIMS1,ENSCHIG00000010440,FBXL20,RAP1B,SNAP25,AP1G1,CASK,SYT7,SLC4A8,CPLX2,ABCA12,SPHK2,ENSCHIG00000013367,PLEK,RAB10,ATP2A2,ZP4,RAP1A,PRKCB,RAB31,CNR1,CADPS2,SYK,ENSCHIG00000021578,STX1B,ENSCHIG00000022037,SYT5,ITGAM,STXBP5L,LRRK2,STX3,VAMP3,RAC2,CAMK2A,PLA2G3,PDPK1,PPP3CB,SYT6,RAB3D,TMED10,STXBP1,DOC2B,CACNA1D,SNAPIN,PSEN1,KIT,RASGR…
GO:BP	dephosphorylation	GO:0016311	0.0230871	1.63663	415	4434	159	15439	NCEH1,NUAK1,PPM1K,CDC14C,NT5E,PPP2R5E,GPATCH2,CNST,ENSCHIG00000006638,INPP5F,MARF1,CHP2,IKBKB,DUSP4,CDC14A,ENSCHIG00000023800,PPP1R12A,DUSP6,PTBP1,ARFGEF3,STYX,ENSCHIG00000017744,SGPP2,BPNT1,SSH1,PTPN11,PTPN4,PPM1E,PLPPR4,ENOPH1,FBP2,EYA4,PIP4P1,PDP2,PPP2R2C,PTPRJ,PPP4R2,HDHD2,PLPP4,CTTNBP2NL,SLC7A14,PPM1H,PTPRS,RNGTT,PTPRK,PHACTR2,ALPL,PTP4A2,YWHAB,MGAT5,PLPP1,ITGA1,PTPN9,PTPRG,CTDSPL,DUSP19,CSR…
GO:BP	positive regulation of transferase activity	GO:0051347	0.0232187	1.63416	394	4434	152	15439	KITLG,ADIPOQ,EPHA4,IQGAP3,PSRC1,POT1,IGF1,LAMTOR3,ARRDC3,PDGFC,RFC5,CARTPT,HGF,ADRA2B,LCP2,PRLR,CACUL1,ITSN1,PRKAG2,MDFIC,VLDLR,GRM1,THBS1,ABI1,LYN,PTPN11,MMD,ERN1,TGFBR2,DLG1,PKD2,HMBOX1,STRADA,CD19,CSF1,NEDD9,TNFRSF11A,PDGFA,MAPK3,ERCC6,MAPK1,FRS2,LPAR1,SASH1,AJUBA,DGKZ,SORL1,ZEB2,SLC8A2,UNC119,SPAG9,EGFR,CD200,MAP3K13,PIK3CA,ECT2,MAP3K20,HTR2B,DDR2,GADD45A,MAP3K12,PDGFRA,MAP3K5,PCNA,ACSL1,MAP3…
GO:BP	epithelium migration	GO:0090132	0.0235268	1.62844	218	4434	92	15439	MEOX2,FGF7,PPARD,ETS1,SP1,HIF1A,THBS1,CYP1B1,AMOTL1,PLEKHG5,PTPN11,TGFBR2,MET,RHOJ,FOXP1,SASH1,LTB4R2,NRP1,PIK3C2A,CORO1C,GPLD1,ZEB2,SOX9,PTPRG,GADD45A,SEMA3A,PTPRR,KDR,ANXA1,PECAM1,SRF,PROX1,VHL,RREB1,EMP2,SVBP,PKN2,PAXIP1,ANLN,MCC,PRKCE,ITGB1,SRC,ENPP2,NF1,NR2F2,PTK2B,P2RX4,FGFR1,ENSCHIG00000022037,TGFBR1,JCAD,FOXC2,HDAC9,CDH5,WDPCP,CIB1,ANGPT4,MEF2C,TEK,BMP10,ADAM17,FBXW7,SPARC,BMPR2,PTPRM,PDP…
GO:BP	organ growth	GO:0035265	0.0236051	1.62699	105	4434	51	15439	ECM1,IGF1,FGF7,DUSP6,RBPJ,BNC2,YAP1,PTPN11,UBE3A,TGFBR2,FOXP1,RARB,ARID2,EVC,STK3,SOX9,DDR2,MMP13,SMPD3,PROX1,FOXC1,WWC2,MAEL,HEY2,IL7,STK4,FGFR1,LEP,TGFBR1,FOXC2,EDN1,SERP1,ZMPSTE24,MEF2C,BMP10,PSAP,TP73,DIPK2A,CXADR,PTK2,TGFB2,SMAD1,VGLL4,POC1A,PLAG1,FGF9,FGF10,FGF20,TBX20,BCL2L11,ADRA1A
GO:BP	developmental process involved in reproduction	GO:0003006	0.0236886	1.62546	586	4434	215	15439	KITLG,RHBDD1,DHCR24,TUT4,IGF1,LEF1,TBPL1,RXFP2,MYOCD,ZNF445,CFTR,GNRH1,SFRP2,PPARD,FOXF2,GREB1L,MARF1,GAS2,HOOK1,ARNT,LHX8,RBPJ,AFF4,CTSB,ENSCHIG00000018293,UBE2J1,QKI,HIF1A,TYRO3,MERTK,BIRC6,ENSCHIG00000018517,DACH1,CYP7B1,LHX9,KDM5B,PTPN11,SALL1,PAFAH1B1,MEIOC,UBE3A,JAG2,DLG1,PKD2,RSPO3,BCL2L2,MNS1,TCF23,DNMT3A,AXL,WDR48,CSF1,BMPR1B,ZFP36L1,UBR2,SMAD4,PLEKHA1,MAPK1,MFSD14A,NOTCH2,FRS2,LHFPL2,AL…
GO:BP	metal ion transport	GO:0030001	0.0258777	1.58707	630	4434	229	15439	CXCL10,ENSCHIG00000020065,MAIP1,ANO6,ABCC9,SLC9B2,SLC4A4,ATG5,HOMER1,CACNB2,ATP1B1,SLC10A7,SLMAP,SLC30A9,KCNJ16,HCN1,ATP2B2,VPS4B,ANK3,MCU,KCNN3,CACNA2D1,KLHL24,SLC41A2,GRIN2B,CACNA1C,LETM1,FYN,MICU2,TRPC4,KCNS2,LYN,KCNA4,TRPC3,TRPV3,ENSCHIG00000011448,DLG1,SLC39A10,AMIGO1,SLC30A7,ENSCHIG00000026028,PKD2,UBQLN1,SLC39A9,SLC30A6,NDFIP2,SNAP25,KCNC1,KCNT2,RANGRF,KCNJ2,CD19,MICU1,NETO1,CASK,NEDD4L,PL…
GO:BP	neuron projection guidance	GO:0097485	0.0268224	1.5715	143	4434	65	15439	EPHA4,ANK3,APBB2,YTHDF1,MATN2,ARHGAP35,DAG1,BDNF,FOXP1,BMPR1B,SMAD4,NRCAM,CRPPA,PALLD,OTX2,NRP1,ALCAM,VASP,KLF7,SEMA3A,MYOT,NFIB,FLRT3,PAX6,CHL1,HOXA2,EPHA5,EFNA5,APP,FZD3,KIF5C,MYH10,EPHA7,SLIT1,GBX2,GDNF,NFASC,MEGF8,TBR1,ENSCHIG00000017301,NRP2,SEMA4F,BMPR2,PTPRM,GAP43,SLIT2,ATOH1,CSF1R,RYK,FLRT2,NEO1,CDH4,POU4F2,TRIO,BCL11B,CNTN2,SEMA3C,B3GNT2,ETV1,DPYSL5,BMP7,SEMA5B,GFRA3,VANGL2,ENSCHIG000000…
GO:BP	epithelial cell differentiation	GO:0030855	0.0269687	1.56914	413	4434	158	15439	ADIPOQ,SULT1B1,EHF,BMP5,RIPOR2,ONECUT2,IKBKB,ATF4,CASP6,RBPJ,CTSB,CD109,HIF1A,CLIC4,YAP1,NPHS2,SALL1,VEZF1,PAFAH1B1,ERCC3,RAP1B,ENSCHIG00000011448,MET,RFX3,FOXP1,RARB,THRB,VSIG1,ZFP36L1,SMAD4,TGFB1I1,CPT1A,NOTCH2,CDK6,FRS2,PTPRS,PALLD,MYO9A,PAX8,ANXA4,IHH,ABCA12,ZEB2,SOX9,TP63,NEUROD1,KLF7,CREB1,ASCL1,NFIB,ANXA1,SGPP1,PCNA,PAX6,RILPL2,TMEM100,PECAM1,E2F8,RAP1A,SMAD3,PROX1,FOXC1,VHL,DSP,SOX4,CDH2,…
GO:BP	regulation of cell adhesion	GO:0030155	0.0277193	1.55722	489	4434	183	15439	ADIPOQ,CXCR4,IGF1,NUAK1,NDNF,LEF1,SOCS5,ITCH,TGM2,TNFSF18,PIK3R1,MAGI1,RIPOR2,ONECUT2,PRKG1,DDR1,ETS1,GLMN,BRAF,PPP1R12A,NR4A3,THBS1,CYP1B1,LYN,RC3H1,PTPN11,TMEM131L,ACTG1,CRK,FRMD5,TGFBR2,DLG1,FN1,SNAI2,GPAM,PLAU,HHLA2,CSF1,RASA1,DOCK8,PTPRJ,CASK,NEDD9,TWSG1,TFE3,CDK6,AP1AR,ENSCHIG00000015151,NRP1,PREX1,IHH,CORO1C,SH2B3,HSPD1,NFAT5,SOX9,ENSCHIG00000017892,EPHA3,COL8A1,BCL6,KDR,CXCL8,HAVCR2,EDIL3…
GO:BP	cellular macromolecule biosynthetic process	GO:0034645	0.0279586	1.55348	3731	4434	1173	15439	RIDA,CCT8,RABL3,XXYLT1,ADIPOQ,EPC2,ORC4,ORC2,IKZF2,KHDRBS1,DHDDS,ECM1,PSRC1,DR1,NFIA,TUT4,MEOX2,TWISTNB,HBP1,POT1,PRICKLE1,CNOT2,IGF1,YARS2,BBS7,LEF1,KLF3,NR3C1,GALNTL6,ZBTB5,EBF2,IARS1,ENSCHIG00000010087,NCOA7,ENSCHIG00000017313,ATG5,TBPL1,BCLAF1,MTRF1L,TTC5,ICE2,FGF7,PAIP2B,ENSCHIG00000018361,ENSCHIG00000027081,EPC1,ITCH,NCOA2,HEY1,ABRA,RRP8,TRIM21,EHF,AHCTF1,ENSCHIG00000016445,GTF2H3,SBNO1,DEN…
GO:BP	tissue migration	GO:0090130	0.0292532	1.53383	219	4434	92	15439	MEOX2,FGF7,PPARD,ETS1,SP1,HIF1A,THBS1,CYP1B1,AMOTL1,PLEKHG5,PTPN11,TGFBR2,MET,RHOJ,FOXP1,SASH1,LTB4R2,NRP1,PIK3C2A,CORO1C,GPLD1,ZEB2,SOX9,PTPRG,GADD45A,SEMA3A,PTPRR,KDR,ANXA1,PECAM1,SRF,PROX1,VHL,RREB1,EMP2,SVBP,PKN2,PAXIP1,ANLN,MCC,PRKCE,ITGB1,SRC,ENPP2,NF1,NR2F2,PTK2B,P2RX4,FGFR1,ENSCHIG00000022037,TGFBR1,JCAD,FOXC2,HDAC9,CDH5,WDPCP,CIB1,ANGPT4,MEF2C,TEK,BMP10,ADAM17,FBXW7,SPARC,BMPR2,PTPRM,PDP…
GO:BP	regulation of actin filament-based process	GO:0032970	0.0297709	1.52621	274	4434	111	15439	PIK3R1,CD2AP,DSG2,PPFIA1,BRAF,EPS8,CACNA1C,CYFIP2,C9ORF72,JMY,GMFB,CYRIA,ARFGEF1,SSH1,ARHGAP35,ACTG1,BAIAP2,PPM1E,CRK,NCKAP1,DLG1,CAPZA1,MET,RANGRF,RASA1,SPIRE1,SMAD4,NOTCH2,SRI,TWF1,AP1AR,WDR1,LPAR1,TMOD2,PLEKHH2,SPTBN1,NRP1,VASP,ENSCHIG00000017892,RICTOR,AKAP13,EPHA3,ECT2,MTPN,PLEK,FER,CCDC88A,PROX1,DSP,ARHGAP28,LIMK1,CAPZA2,EPHA5,EFNA5,NCK1,LATS1,TMOD3,PRKCE,FCHSD2,RDX,SHANK1,SSH2,PRKCD,PTK2B,…
GO:BP	regulation of binding	GO:0051098	0.031345	1.50383	251	4434	103	15439	ADIPOQ,EPHA4,IGF1,LEF1,EBF2,HEY1,MYOCD,GZMA,RIPOR2,WAPL,ILRUN,IDE,TIAM1,C9ORF72,STYX,PAX7,DNAJB2,TMC8,CRK,MET,BDNF,SMAD4,MAPK3,ERCC4,TCF7L2,RSF1,SRI,HOXA3,NSD1,NCBP1,CDK9,STK3,SORL1,NEUROD1,ENSCHIG00000023971,LOX,STING1,PAX6,ATP2A2,GMNN,BTAF1,SMAD3,FOXC1,ARHGAP28,CDON,HES1,CAPRIN2,EP300,APP,HEY2,TTBK2,RB1,TNFSF11,BAMBI,SRC,SPPL3,CYLD,SIRT2,MED25,NIPBL,TERT,CTNNB1,ARRB1,STK4,ZBTB7A,TGFBR1,PLCL2,PY…
GO:BP	negative regulation of cellular response to transforming growth factor beta stimulus	GO:1903845	0.0321512	1.4928	60	4434	33	15439	ASPN,ONECUT2,ENSCHIG00000008899,CD109,PRDM16,GLG1,CHST11,CAV2,TGFB1I1,SNX25,PMEPA1,VEPH1,LEMD3,FBN1,LTBP1,SPRED2,BAMBI,CIDEA,ZBTB7A,ZNF451,ADAM17,TP53,IL17RD,PDPK1,PBLD,FBN2,SKI,SMURF2,SPRED1,CAV1,SMAD7,SMURF1,HTRA3
GO:BP	axon guidance	GO:0007411	0.0328768	1.48311	141	4434	64	15439	EPHA4,ANK3,APBB2,YTHDF1,MATN2,ARHGAP35,DAG1,BDNF,FOXP1,BMPR1B,SMAD4,NRCAM,CRPPA,PALLD,OTX2,NRP1,ALCAM,VASP,KLF7,SEMA3A,MYOT,NFIB,FLRT3,PAX6,CHL1,HOXA2,EPHA5,EFNA5,APP,FZD3,KIF5C,MYH10,EPHA7,SLIT1,GBX2,GDNF,NFASC,MEGF8,TBR1,ENSCHIG00000017301,NRP2,SEMA4F,BMPR2,PTPRM,GAP43,SLIT2,ATOH1,CSF1R,RYK,FLRT2,NEO1,CDH4,POU4F2,TRIO,BCL11B,CNTN2,SEMA3C,B3GNT2,ETV1,DPYSL5,BMP7,GFRA3,VANGL2,ENSCHIG00000016980
GO:BP	kidney epithelium development	GO:0072073	0.0332167	1.47864	114	4434	54	15439	ADIPOQ,EPHA4,GREB1L,LZTS2,YAP1,NPHS2,SALL1,DLG1,PKD2,BDNF,RARB,SMAD4,NOTCH2,ENSCHIG00000026624,PAX8,SOX9,SMAD5,PECAM1,NPNT,SMAD3,FOXC1,HES1,PROM1,PTCH1,EPCAM,EYA1,KIF26B,FAT4,CTNNB1,EPHA7,FGFR1,FOXC2,GDNF,UMOD,MEF2C,SIX4,CALB1,SIX1,SFRP1,HEYL,RET,WWTR1,SLIT2,FMN1,GZF1,SMAD1,HOXB7,DCHS1,LGR4,SMAD7,BMP7,WT1,WNT2B,KANK2
GO:BP	regulation of supramolecular fiber organization	GO:1902903	0.0337906	1.4712	263	4434	107	15439	PSRC1,SLAIN2,CLIP3,PIK3R1,APC,PPFIA1,BRAF,EPS8,CYFIP2,C9ORF72,DYRK1A,JMY,GMFB,NIN,CYRIA,ARFGEF1,SSH1,ARHGAP35,ACTG1,PPM1E,NCKAP1,DLG1,CAPZA1,MET,STMN2,RANGRF,RASA1,SPIRE1,SMAD4,TWF1,AP1AR,WDR1,LPAR1,TMOD2,PLEKHH2,SPTBN1,NRP1,VASP,RICTOR,AKAP13,HDGFL3,PRUNE1,MTPN,LDLR,PLEK,FER,SPAST,CCDC88A,PROX1,TOGARAM1,ARHGAP28,LIMK1,CAPZA2,APP,NCK1,LATS1,TMOD3,TTBK2,PRKCE,RB1,FCHSD2,RDX,SHANK1,TAOK1,SSH2,PRKCD…
GO:BP	adipose tissue development	GO:0060612	0.0367288	1.43499	28	4434	19	15439	ARRDC3,EBF2,SPART,PPARD,ATF2,CSF1,ZNF516,SORL1,PIK3CA,KLF7,ARID5B,PAXIP1,LEP,NR1H4,PPARGC1A,SPTLC2,POU4F2,PGRMC2,SLC25A25
GO:BP	calcium ion homeostasis	GO:0055074	0.0367293	1.43499	246	4434	101	15439	CXCL10,MAIP1,RAP1GDS1,GRIA1,ATG5,CACNB2,TGM2,ATP1B1,SLC10A7,TMEM64,ATP2B2,GLP1R,MCU,GRIN2B,CACNA1C,ATF4,LETM1,FYN,GRM1,MICU2,LYN,TRPC3,PKD2,CD19,ATP13A2,ATP2B3,SRI,LPAR1,GPR6,TMEM178A,TRPA1,SLC30A1,SLC8A2,TSPOAP1,ENSCHIG00000013367,HTR2B,TRPM8,PDGFRA,CXCL11,ATP2A2,CCL8,SMAD3,PRKCB,FFAR4,ADCY5,TRIM24,SNX10,APP,ATP2C1,CNR1,F2R,PRKCE,GPR12,KL,TNFSF11,SPPL3,PRKD1,CHRNA7,PTK2B,P2RX4,GRM5,VDR,PLN,HTR2A…
GO:BP	cell junction assembly	GO:0034329	0.0374806	1.42619	249	4434	102	15439	CLDN1,LRRC4,GABRA2,LRRTM3,ADGRL1,LRRN1,EPB41L3,IKBKB,SHANK2,HIPK1,GABRB2,ACTG1,RAP1B,DLG1,FN1,CAPZA1,AMIGO1,SNAI2,BDNF,PTPRJ,VSTM5,SLITRK2,WDR1,CLSTN2,CTNNA1,PTPRS,PTPRK,MYO9A,AJUBA,PCDH17,NRP1,CORO1C,ENSCHIG00000017892,BSN,EPHA3,ECT2,KDR,SLITRK6,FLRT3,PECAM1,SRF,RAP1A,LRRN3,GABRA1,LAMC1,CDH2,PKN2,GRID2,EFNA5,APP,NTRK2,SRC,RAB29,FZD5,CTNNB1,AMIGO2,EPHA7,FAM107A,PTPRD,CORO2B,NECTIN1,PEAK1,NTRK3,EN…
GO:BP	Golgi vesicle transport	GO:0048193	0.0378583	1.42184	172	4434	75	15439	STX17,GCC2,CNST,SLC10A7,GOLGA5,VAPA,SEC23IP,EXOC2,ANK3,SEC24A,RAB14,ACSL3,RAB6A,RABEP1,ENSCHIG00000010440,RANGRF,AP1G1,LMAN1,AP1AR,SPTBN1,SEC23B,SORL1,ARCN1,EPS15,KLHL20,SPAST,RAB31,CUX1,GGA2,KDELR2,GOLGA7,USO1,UVRAG,RSC1A1,MYO18A,GOLPH3,PRKD1,SEC23A,SEC31A,STX5,ARF5,SORT1,SEC16A,STX18,ENSCHIG00000017940,RAB7B,TRAPPC6B,TRAPPC3L,COG2,LRRK2,VAMP3,CEP19,MACF1,SNX1,ARFGEF2,ANKFY1,KLHL12,SEC31B,CYTH3,…
GO:BP	cellular divalent inorganic cation homeostasis	GO:0072503	0.0382136	1.41778	252	4434	103	15439	CXCL10,MAIP1,RAP1GDS1,GRIA1,ATG5,CACNB2,TGM2,ATP1B1,SLC10A7,SLC30A9,TMEM64,ATP2B2,GLP1R,MCU,GRIN2B,CACNA1C,ATF4,LETM1,FYN,GRM1,MICU2,LYN,TRPC3,SLC30A7,PKD2,AP3D1,CD19,ATP13A2,ATP2B3,SRI,LPAR1,GPR6,SLC30A4,TMEM178A,TRPA1,SLC30A1,SLC8A2,TSPOAP1,ENSCHIG00000013367,HTR2B,TRPM8,PDGFRA,CXCL11,SLC39A14,TRPM7,ATP2A2,CCL8,SMAD3,PRKCB,FFAR4,ADCY5,APP,ATP2C1,CNR1,F2R,PRKCE,GPR12,SPPL3,PRKD1,CHRNA7,PTK2B,P2R…
GO:BP	cytosolic transport	GO:0016482	0.0406281	1.39117	104	4434	50	15439	TMEM87A,GCC2,VTI1A,HOOK3,HOOK1,RAB21,PHETA2,RAB14,SNX3,RAB6A,ARFIP1,EVI5,AP1G1,PIKFYVE,SYT7,AP1AR,SNX2,SNX5,SORL1,SPAG9,EPS15,PPFIA2,ARL1,RIC1,KLHL20,EMP2,SRC,SNX16,DENND5A,RDX,RAB29,STX5,SORT1,RAB7B,PIK3C3,LRRK2,VAMP3,SNX1,ANKFY1,DAB2,LMTK2,DENND2A,RHOBTB3,TBC1D23,TRIM27,VPS54,SNX8,KIF16B,ACTR2,EHD3
GO:BP	membrane organization	GO:0061024	0.0406884	1.39053	443	4434	167	15439	MAIP1,STX12,SYT11,DHCR24,LRRC4,ANO6,STX17,BLOC1S6,SLC7A11,CHRNB1,NUP155,TMEM14A,VAPA,VTI1A,SNX18,VPS4B,EPB41L3,ANK3,REEP3,FNBP1L,C2CD5,ATP8A1,LETM1,SEC24A,ARF1,SNX3,CERT1,THBS1,MTSS1,GLRB,BAIAP2,PAFAH1B1,ENSCHIG00000010440,DLG1,ATF2,PPT1,ANO4,TMEM30B,RAB39A,TIMM22,CAV2,PIKFYVE,TRIM72,PICALM,SYT7,ATP13A2,ELMO1,NRCAM,ATP11B,STARD4,ENSCHIG00000015151,HACE1,CPLX2,SPTBN1,SEC23B,VAMP4,CORO1C,CHMP6,RHOT…
GO:BP	ossification	GO:0001503	0.0409535	1.38771	264	4434	107	15439	ECM1,FIGNL1,ANO6,IGF1,LEF1,ASPN,TMEM64,SFRP2,SBDS,ATF4,RBPJ,BMP2K,HIF1A,IGFBP5,KLF10,PTPN11,SNAI2,CSF1,BMPR1B,NAB1,TNFRSF11A,TWSG1,MAPK3,MAPK1,CDK6,ALPL,IHH,SATB2,SOX9,CHSY1,TP63,DDR2,LOX,SMAD5,BPNT2,MMP16,MMP13,SMPD3,NPNT,SMAD3,FOXC1,FFAR4,VEGFC,SNX10,HOXA2,PPARGC1B,PTCH1,RORB,KL,TNFSF11,TP53INP2,CEBPB,ZBTB16,FAT4,CBFB,CEBPA,SP3,TOB1,NIPBL,PRKD1,CTNNB1,PTK2B,FOXC2,PTN,CLEC5A,DMP1,PEX7,IL6ST,RUNX…
GO:BP	synaptic vesicle exocytosis	GO:0016079	0.0412625	1.38444	63	4434	34	15439	CACNB2,BRAF,SYT1,NAPB,ENSCHIG00000010440,FBXL20,RAP1B,SNAP25,CASK,SYT7,SLC4A8,CPLX2,ENSCHIG00000013367,ATP2A2,RAP1A,PRKCB,CNR1,CADPS2,ENSCHIG00000021578,STX1B,ENSCHIG00000022037,STXBP5L,LRRK2,STX3,CAMK2A,STXBP1,DOC2B,CACNA1D,SNAPIN,PSEN1,APBA1,ADCY1,CACNA1A,GIPC1
GO:BP	cellular response to glucocorticoid stimulus	GO:0071385	0.0419115	1.37767	18	4434	14	15439	NR3C1,KLF9,CREBRF,ZFP36L1,EIF4E,HNRNPU,AKAP13,ANXA1,CASP9,FAM107A,FBXO32,DDIT4,ZFP36L2,TFAP4
GO:BP	cellular response to corticosteroid stimulus	GO:0071384	0.0419115	1.37767	18	4434	14	15439	NR3C1,KLF9,CREBRF,ZFP36L1,EIF4E,HNRNPU,AKAP13,ANXA1,CASP9,FAM107A,FBXO32,DDIT4,ZFP36L2,TFAP4
GO:BP	negative regulation of neurogenesis	GO:0050768	0.0438095	1.35843	167	4434	73	15439	EPHA4,SPART,RAP1GAP2,INPP5F,PAQR3,GNRH1,HOOK3,DDX6,MEIS1,STMN2,BDNF,THRB,MYLIP,EIF4E,CTNNA1,PTPRS,LPAR1,ENSCHIG00000015151,SORL1,SOX9,PTPN9,NEPRO,MAP2,SEMA3A,ASCL1,LDLR,PAX6,MIB1,GFI1,HES1,HOXA2,FSTL4,APP,RAB29,ASPM,KIAA0319,ZNF536,CTNNB1,EPHA7,APPL2,PRKCSH,BMERB1,DAB1,PTN,LRIG2,CIB1,DAAM2,TBX6,TP53,BAG5,SYNGAP1,EFNA1,PPP3CA,SLIT2,SPOCK1,RYK,BRINP1,NKX2-2,ZHX2,PTK2,F2,SKI,POU4F2,SNAPIN,PSEN1,CNTF…
GO:BP	anatomical structure formation involved in morphogenesis	GO:0048646	0.0438452	1.35808	791	4434	279	15439	CXCL10,ECM1,CD53,COL11A1,MEOX2,PRICKLE1,CNOT2,NDNF,LEF1,GJA1,TBPL1,TGM2,HEY1,RIPOR2,KIF20B,SFRP2,EPB41L3,ACKR3,ETS1,GLMN,F3,HIPK1,SP1,RBPJ,RECK,CD109,HIF1A,THBS1,CYP1B1,CLIC4,PCDH8,ABI1,MTDH,AGO2,RC3H1,PTPN11,ARHGAP35,ACTG1,VEZF1,PAFAH1B1,EPN2,DAG1,TGFBR2,ENSCHIG00000023082,ATF2,FN1,RSPO3,ADGRG6,RHOJ,MEIS1,MINAR1,FOXP1,PIKFYVE,C6,SMAD4,TWSG1,MAPK3,SH3PXD2A,ADAM12,MAPK1,MFSD14A,NOTCH2,HOXA3,NRCAM,…
GO:BP	chondrocyte differentiation	GO:0002062	0.0452875	1.34402	86	4434	43	15439	ECM1,ADAMTS12,SFRP2,WNT5B,PTPN11,GLG1,TGFBR2,CHST11,SOX5,SNAI2,TRIP11,RARB,BMPR1B,MEX3C,SNX19,IHH,SOX9,LNPK,NFIB,SLC39A14,BPNT2,SMPD3,SMAD3,ZBTB16,CTNNB1,FGFR1,TGFBR1,MAF,RUNX2,MEF2C,OSR2,BMPR2,SOX6,POC1A,SULF2,CREB3L2,FGF9,SMAD7,CCN2,EFEMP1,GDF6,RFLNB,WNT2B
GO:BP	in utero embryonic development	GO:0001701	0.0459187	1.33801	291	4434	116	15439	CNOT2,IGF1,LEF1,NMT1,RRN3,UBR3,SBDS,ARNT,RBPJ,HIF1A,CERT1,BIRC6,LPAR6,TGFBR2,PKD2,RSPO3,SRSF1,FOXP1,ZFP36L1,C6,SMAD4,PLPP4,MAPK1,NOTCH2,SMIM14,MGAT1,STK3,IHH,SLC30A1,TCTN1,CMTM3,PTPRR,PDGFRA,RDH10,ADM,TMEM100,NSRP1,COPS3,TASOR,SRF,E2F8,SMAD3,NCOA1,FOXC1,RBBP6,TAF8,MIB1,HES1,KLF2,ZFAND5,PTCH1,HEY2,LATS1,ADAM10,APOB,ITGB1,CEBPB,FZD5,VASH2,TBX3,CEBPA,GNA13,NDEL1,MYH10,SP3,BPTF,NR2F2,SETD2,CTNNB1,STK…
GO:BP	regulation of organelle assembly	GO:1902115	0.0462155	1.33521	145	4434	65	15439	ELAPOR1,CNOT2,G3BP1,ATG5,PIP4K2A,VPS4B,CEP76,C9ORF72,KAT2B,FEZ2,PAN3,ARHGAP35,SEC22B,MNS1,PIKFYVE,SMAD4,CCSAP,CDKL5,PTPRS,HNRNPU,AKAP13,CHMP2B,CNOT6L,STAM,RAB3GAP2,CNTROB,CEP135,CCDC88A,PROX1,RBM14,PRKAA2,SH3GLB1,GRID2,MAPK9,SENP6,SRC,RDX,ATMIN,CYLD,MAP4,SAXO1,STX18,LCP1,SDCCAG8,EDN1,LRRK2,RNF4,PATL2,MEF2C,CHMP5,BMP10,IFT20,CCP110,MDM1,G3BP2,SYNE2,SDC1,CEP97,SEPTIN9,PIP4K2C,SMCR8,CEP120,CNOT6,PIP…
GO:BP	response to oxidative stress	GO:0006979	0.046462	1.3329	253	4434	103	15439	ADIPOQ,DHCR24,NCOA7,SLC7A11,HGF,SRXN1,SFPQ,SLC25A24,ARNT,ATF4,XPA,ENSCHIG00000018293,HIF1A,GCH1,CYP1B1,NUDT15,RRM2B,ERCC3,MET,MSRB3,UBQLN1,NET1,GCLC,MAPK3,PLEKHA1,ERCC6,MAPK1,ATP13A2,PTPRK,TRPA1,NR4A2,EGFR,ECT2,PRKRA,PDGFRA,FANCC,MAP3K5,TP53INP1,ATP2A2,SMPD3,ARL6IP5,PRDX3,FER,VKORC1L1,CHUK,MTF1,STOX1,PRKAA2,GCLM,PPARGC1B,APP,MAPK9,SLC1A1,SESN1,SOD2,RCAN1,SETX,SRC,SESN3,PTGS2,DIABLO,STX2,SIRT2,PDK…
GO:BP	macromolecule biosynthetic process	GO:0009059	0.0470116	1.32779	3822	4434	1197	15439	RIDA,CCT8,RABL3,XXYLT1,ADIPOQ,EPC2,ORC4,ORC2,IKZF2,KHDRBS1,DHDDS,ECM1,PSRC1,DR1,NFIA,TUT4,MEOX2,TWISTNB,HBP1,POT1,PRICKLE1,CNOT2,IGF1,YARS2,CLEC7A,BBS7,LEF1,KLF3,NR3C1,GALNTL6,ZBTB5,EBF2,IARS1,ENSCHIG00000010087,NCOA7,ENSCHIG00000017313,ATG5,TBPL1,BCLAF1,MTRF1L,TTC5,ICE2,FGF7,PAIP2B,ENSCHIG00000018361,ENSCHIG00000027081,EPC1,ITCH,NCOA2,HEY1,ABRA,RRP8,TRIM21,EHF,AHCTF1,ENSCHIG00000016445,SLC10A7,G…
GO:BP	mesenchyme development	GO:0060485	0.0471387	1.32662	187	4434	80	15439	KITLG,LEF1,SFRP2,RBM24,TIAM1,RBPJ,BNC2,HIF1A,YAP1,DAG1,TGFBR2,FN1,PKD2,SNAI2,ZFP36L1,SMAD4,TGFB1I1,MAPK3,TCF7L2,MAPK1,TGFBR3,CORO1C,ZEB2,SOX9,DDX5,HTR2B,SEMA3A,RDH10,TMEM100,KBTBD8,SMAD3,FOXC1,HES1,HEY2,ENSCHIG00000017824,SPRED2,BAMBI,TRIM62,CTNNB1,FGFR1,GBX2,PPP2CA,TGFBR1,FOXC2,GDNF,EDN1,NUP133,NRP2,MEF2C,SIX4,DAB2,SIX1,KLHL12,BMPR2,IL17RD,PTK7,SFRP1,HEYL,PBLD,RET,EFNA1,WWTR1,FAM172A,TGFB2,DCHS1…
GO:CC	intracellular	GO:0005622	2.51308e-46	45.5998	10881	4550	3493	15912	CD36,KITLG,RIDA,OPRK1,CCT8,ARL13B,SLC35A5,ATP6V1A,MASP1,ADIPOQ,DCUN1D1,ZMAT3,PHC3,TTC3,RAPGEF4,PPIG,EPC2,ORC4,CXCR4,MAIP1,ENSCHIG00000020570,ORC2,ABI2,IKZF2,EPHA4,RHBDD1,KHDRBS1,SNRNP40,STX12,TRIM63,MREG,IQGAP3,SYT11,ANP32E,VPS45,HAO2,PSRC1,ELAPOR1,RNPC3,OLFM3,DR1,ENSCHIG00000013246,KANK4,NFIA,DHCR24,TUT4,TM2D1,LURAP1,FIGNL1,MEOX2,TWISTNB,NAPEPLD,HBP1,YAE1,POT1,CEP41,KLHDC10,ANO6,PRICKLE1,CNOT2,U…
GO:CC	cytoplasm	GO:0005737	1.7751e-44	43.7508	7447	4550	2538	15912	CD36,KITLG,RIDA,OPRK1,CCT8,ARL13B,SLC35A5,ATP6V1A,MASP1,ADIPOQ,DCUN1D1,TTC3,RAPGEF4,PPIG,ORC4,CXCR4,MAIP1,ENSCHIG00000020570,EPHA4,RHBDD1,KHDRBS1,SNRNP40,STX12,TRIM63,MREG,IQGAP3,SYT11,ANP32E,VPS45,HAO2,PSRC1,ELAPOR1,OLFM3,ENSCHIG00000013246,KANK4,DHCR24,TUT4,LURAP1,FIGNL1,MEOX2,NAPEPLD,YAE1,ANO6,PRICKLE1,CNOT2,USP15,IGF1,NUAK1,YARS2,ABCC9,GABARAPL1,CLEC7A,BBS7,SYNPO2,LEF1,TBCK,SLC9B2,LAMTOR3,TRM…
GO:CC	membrane-bounded organelle	GO:0043227	2.70314e-41	40.5681	8271	4550	2758	15912	CD36,RIDA,OPRK1,CCT8,ARL13B,SLC35A5,CD86,XXYLT1,MASP1,ADIPOQ,DCUN1D1,ZMAT3,PHC3,TTC3,PPIG,EPC2,ORC4,CXCR4,MAIP1,ENSCHIG00000020570,ORC2,IKZF2,EPHA4,RHBDD1,KHDRBS1,SNRNP40,STX12,MREG,SYT11,ANP32E,VPS45,HAO2,PSRC1,ELAPOR1,RNPC3,OLFM3,DR1,NFIA,DHCR24,TUT4,TM2D1,LURAP1,FIGNL1,MEOX2,TWISTNB,NAPEPLD,HBP1,YAE1,POT1,KLHDC10,PRICKLE1,CNOT2,USP15,IGF1,NUAK1,YARS2,GABARAPL1,KLRG1,SYNPO2,LEF1,SLC9B2,LAMTOR3,…
GO:CC	intracellular membrane-bounded organelle	GO:0043231	2.33243e-34	33.6322	7701	4550	2562	15912	CD36,RIDA,OPRK1,CCT8,SLC35A5,MASP1,ADIPOQ,DCUN1D1,ZMAT3,PHC3,TTC3,PPIG,EPC2,ORC4,CXCR4,MAIP1,ENSCHIG00000020570,ORC2,IKZF2,RHBDD1,KHDRBS1,SNRNP40,SYT11,ANP32E,VPS45,HAO2,PSRC1,ELAPOR1,RNPC3,OLFM3,DR1,NFIA,DHCR24,TUT4,TM2D1,LURAP1,FIGNL1,MEOX2,TWISTNB,NAPEPLD,HBP1,YAE1,POT1,KLHDC10,PRICKLE1,CNOT2,USP15,NUAK1,YARS2,GABARAPL1,KLRG1,SYNPO2,LEF1,SLC9B2,TRMT10A,RAP1GDS1,PPM1K,KLF3,TMEM33,ALDH7A1,TNFAIP…
GO:CC	organelle	GO:0043226	1.34521e-28	27.8712	9815	4550	3124	15912	CD36,KITLG,RIDA,OPRK1,CCT8,ARL13B,SLC35A5,CD86,XXYLT1,MASP1,ADIPOQ,DCUN1D1,ZMAT3,PHC3,TTC3,PPIG,EPC2,ORC4,CXCR4,MAIP1,ENSCHIG00000020570,ORC2,ABI2,IKZF2,EPHA4,RHBDD1,KHDRBS1,SNRNP40,STX12,MREG,SYT11,ANP32E,VPS45,HAO2,PSRC1,ELAPOR1,RNPC3,OLFM3,DR1,KANK4,NFIA,DHCR24,TUT4,TM2D1,LURAP1,FIGNL1,MEOX2,TWISTNB,NAPEPLD,HBP1,YAE1,POT1,LRRC4,CEP41,KLHDC10,PRICKLE1,CNOT2,USP15,GAS2L3,IGF1,NUAK1,YARS2,ABCC9,G…
GO:CC	intracellular organelle	GO:0043229	3.25475e-26	25.4875	9504	4550	3025	15912	CD36,KITLG,RIDA,OPRK1,CCT8,ARL13B,SLC35A5,MASP1,ADIPOQ,DCUN1D1,ZMAT3,PHC3,TTC3,PPIG,EPC2,ORC4,CXCR4,MAIP1,ENSCHIG00000020570,ORC2,ABI2,IKZF2,EPHA4,RHBDD1,KHDRBS1,SNRNP40,STX12,MREG,SYT11,ANP32E,VPS45,HAO2,PSRC1,ELAPOR1,RNPC3,OLFM3,DR1,KANK4,NFIA,DHCR24,TUT4,TM2D1,LURAP1,FIGNL1,MEOX2,TWISTNB,NAPEPLD,HBP1,YAE1,POT1,CEP41,KLHDC10,PRICKLE1,CNOT2,USP15,GAS2L3,IGF1,NUAK1,YARS2,ABCC9,GABARAPL1,KLRG1,BBS…
GO:CC	nuclear lumen	GO:0031981	3.4504e-24	23.4621	3138	4550	1143	15912	OPRK1,CCT8,MASP1,DCUN1D1,ZMAT3,PHC3,TTC3,PPIG,EPC2,ORC4,ORC2,KHDRBS1,SNRNP40,ANP32E,PSRC1,RNPC3,DR1,NFIA,TUT4,TM2D1,FIGNL1,TWISTNB,HBP1,POT1,KLHDC10,CNOT2,NUAK1,YARS2,SYNPO2,TRMT10A,KLF3,TNFAIP8,NR3C1,SLU7,GJA1,TBPL1,BCLAF1,NT5E,PPIL4,TTC5,ICE2,GCC2,CEP68,ENSCHIG00000027081,EPC1,ITCH,NCOA2,NUDCD1,ESRP1,RRP8,TRIM21,CSTF3,EHF,GPATCH2,AHCTF1,EXO1,GTF2H3,SNX20,ATXN1L,NUFIP2,MYOCD,ENDOV,CPSF2,MAGI1,SR…
GO:CC	nucleus	GO:0005634	1.52574e-23	22.8165	5163	4550	1759	15912	RIDA,OPRK1,CCT8,MASP1,DCUN1D1,ZMAT3,PHC3,TTC3,PPIG,EPC2,ORC4,ORC2,IKZF2,KHDRBS1,SNRNP40,ANP32E,PSRC1,RNPC3,DR1,NFIA,DHCR24,TUT4,TM2D1,FIGNL1,MEOX2,TWISTNB,NAPEPLD,HBP1,YAE1,POT1,KLHDC10,PRICKLE1,CNOT2,USP15,NUAK1,YARS2,SYNPO2,LEF1,TRMT10A,KLF3,TMEM33,TNFAIP8,NR3C1,SLU7,ZBTB5,XPO7,EBF2,GJA1,TBPL1,BCLAF1,NT5E,PPIL4,CRHBP,HACD3,TTC5,ICE2,GCC2,CEP68,ENSCHIG00000018361,ENSCHIG00000027081,EPC1,ITCH,ADN…
GO:CC	nucleoplasm	GO:0005654	2.38378e-22	21.6227	2733	4550	1006	15912	OPRK1,CCT8,MASP1,DCUN1D1,ZMAT3,PHC3,TTC3,PPIG,EPC2,ORC4,ORC2,KHDRBS1,SNRNP40,ANP32E,PSRC1,RNPC3,DR1,NFIA,TM2D1,HBP1,POT1,KLHDC10,CNOT2,NUAK1,YARS2,SYNPO2,TRMT10A,KLF3,TNFAIP8,NR3C1,SLU7,GJA1,TBPL1,BCLAF1,NT5E,PPIL4,TTC5,ICE2,GCC2,CEP68,ENSCHIG00000027081,EPC1,ITCH,NCOA2,NUDCD1,ESRP1,RRP8,TRIM21,CSTF3,EHF,GPATCH2,EXO1,GTF2H3,SNX20,ATXN1L,NUFIP2,CPSF2,MAGI1,SRPK1,ELP2,ONECUT2,UBN1,RNF40,ENSCHIG0000…
GO:CC	intracellular organelle lumen	GO:0070013	7.30396e-22	21.1364	3414	4550	1217	15912	RIDA,OPRK1,CCT8,MASP1,DCUN1D1,ZMAT3,PHC3,TTC3,PPIG,EPC2,ORC4,MAIP1,ORC2,KHDRBS1,SNRNP40,ANP32E,PSRC1,RNPC3,DR1,NFIA,TUT4,TM2D1,FIGNL1,TWISTNB,HBP1,POT1,KLHDC10,CNOT2,NUAK1,YARS2,SYNPO2,TRMT10A,KLF3,TNFAIP8,NR3C1,SLU7,GJA1,TBPL1,BCLAF1,NT5E,PPIL4,TXNDC16,TTC5,ICE2,GCC2,CEP68,ENSCHIG00000027081,EPC1,ITCH,NCOA2,NUDCD1,ESRP1,TIMM8B,RRP8,TRIM21,CSTF3,EHF,GPATCH2,AHCTF1,EXO1,GTF2H3,SNX20,ATXN1L,NUFIP2,…
GO:CC	organelle lumen	GO:0043233	7.30396e-22	21.1364	3414	4550	1217	15912	RIDA,OPRK1,CCT8,MASP1,DCUN1D1,ZMAT3,PHC3,TTC3,PPIG,EPC2,ORC4,MAIP1,ORC2,KHDRBS1,SNRNP40,ANP32E,PSRC1,RNPC3,DR1,NFIA,TUT4,TM2D1,FIGNL1,TWISTNB,HBP1,POT1,KLHDC10,CNOT2,NUAK1,YARS2,SYNPO2,TRMT10A,KLF3,TNFAIP8,NR3C1,SLU7,GJA1,TBPL1,BCLAF1,NT5E,PPIL4,TXNDC16,TTC5,ICE2,GCC2,CEP68,ENSCHIG00000027081,EPC1,ITCH,NCOA2,NUDCD1,ESRP1,TIMM8B,RRP8,TRIM21,CSTF3,EHF,GPATCH2,AHCTF1,EXO1,GTF2H3,SNX20,ATXN1L,NUFIP2,…
GO:CC	membrane-enclosed lumen	GO:0031974	7.30396e-22	21.1364	3414	4550	1217	15912	RIDA,OPRK1,CCT8,MASP1,DCUN1D1,ZMAT3,PHC3,TTC3,PPIG,EPC2,ORC4,MAIP1,ORC2,KHDRBS1,SNRNP40,ANP32E,PSRC1,RNPC3,DR1,NFIA,TUT4,TM2D1,FIGNL1,TWISTNB,HBP1,POT1,KLHDC10,CNOT2,NUAK1,YARS2,SYNPO2,TRMT10A,KLF3,TNFAIP8,NR3C1,SLU7,GJA1,TBPL1,BCLAF1,NT5E,PPIL4,TXNDC16,TTC5,ICE2,GCC2,CEP68,ENSCHIG00000027081,EPC1,ITCH,NCOA2,NUDCD1,ESRP1,TIMM8B,RRP8,TRIM21,CSTF3,EHF,GPATCH2,AHCTF1,EXO1,GTF2H3,SNX20,ATXN1L,NUFIP2,…
GO:CC	cell junction	GO:0030054	4.09874e-21	20.3873	1118	4550	470	15912	CLDN1,CLDN18,RAPGEF4,CXCR4,EPHA4,IQGAP3,SYT11,CD53,OLFM3,NFIA,LRRC4,SYNPO2,SLC9B2,GABRG1,GABRA2,GRIA1,GABRA6,GJA1,CRHBP,HOMER1,CDH24,CEP68,SPART,PARD3,CACNB2,ATP1B1,NMNAT2,SNTB2,CHRNB1,MPP2,CARTPT,PIK3R1,MAGI1,VAPA,UBN1,LRRTM3,CLDN16,APC,LYPD1,GRIA2,LCP2,SORBS1,ATP2B2,CD2AP,DSG2,EPB41L3,EIF3A,ANK3,SHANK2,PPFIA1,ITSN1,RAB3B,NAMPT,KLHL24,SYT1,TIAM1,EPS8,GRIN2B,CACNA1C,PRSS12,GABRB2,CYFIP2,PURA,PLAA…
GO:CC	endomembrane system	GO:0012505	2.55405e-19	18.5928	2567	4550	938	15912	CD36,SLC35A5,XXYLT1,ADIPOQ,CXCR4,EPHA4,RHBDD1,MREG,SYT11,VPS45,ELAPOR1,OLFM3,DHCR24,NAPEPLD,PRICKLE1,IGF1,SLC9B2,LAMTOR3,RAP1GDS1,TMEM33,JAKMIP2,GRIA1,ARRDC3,GALNTL6,STX17,XPO7,CLVS2,ENSCHIG00000022022,CRHBP,TXNDC16,HACD3,TMEM87A,FGF7,BLOC1S6,GCC2,GOLGA1,ENSCHIG00000005130,PARD3,EPC1,ITCH,TGM2,TMEM41B,EHF,GLYATL2,AHCTF1,CNST,FMO2,NMNAT2,SLC10A7,SNX20,CYB5B,CLIP3,PIGW,RAP1GAP2,ENSCHIG00000023339,C…
GO:CC	cytosol	GO:0005829	5.77027e-18	17.2388	2356	4550	864	15912	OPRK1,CCT8,ATP6V1A,MASP1,DCUN1D1,TTC3,RAPGEF4,PPIG,ORC4,SNRNP40,STX12,PSRC1,KANK4,TUT4,LURAP1,NAPEPLD,ANO6,PRICKLE1,CNOT2,USP15,SYNPO2,TRMT10A,RAP1GDS1,SLAIN2,ALDH7A1,NR3C1,G3BP1,SLU7,HMMR,PPIP5K2,ALDH1A1,IARS1,NT5E,PPIL4,HOMER1,DPP8,TMEM87A,ICE2,BLOC1S6,DAAM1,PPP2R5E,GCC2,CEP68,SPART,TGM2,NUDCD1,RRP8,ENSCHIG00000016445,PDGFC,NUFIP2,RAP1GAP2,CCDC43,NMT1,ANKRA2,PIK3R1,SRPK1,TBCC,ELP2,KIF20B,KIF11,…
GO:CC	anchoring junction	GO:0070161	5.4143e-11	10.2665	426	4550	192	15912	CLDN1,CLDN18,IQGAP3,CD53,SYNPO2,GJA1,CDH24,PARD3,ATP1B1,PIK3R1,MAGI1,VAPA,UBN1,CLDN16,APC,LCP2,SORBS1,CD2AP,DSG2,EPB41L3,ANK3,PPFIA1,KLHL24,TIAM1,GJD2,TLN2,CCDC85A,CLIC4,TRPC4,LIN7C,AMOTL1,ENAH,PLEKHG5,NPHS2,ACTG1,FRMD5,DAG1,RAP1B,DLG1,SLC2A2,PKD2,RANGRF,CAV2,LMLN,PTPRJ,PIKFYVE,CASK,DSG1,TGFB1I1,SSX2IP,TWF1,FRS2,RAP2B,WDR1,CTNNA1,PALLD,PTPRK,CLDN20,AJUBA,STRN,NRP1,FRMD4A,ENSCHIG00000018589,PARVA,…
GO:CC	vesicle	GO:0031982	9.7646e-11	10.0103	1116	4550	427	15912	CD86,CXCR4,EPHA4,STX12,MREG,SYT11,ANP32E,VPS45,ELAPOR1,NAPEPLD,IGF1,SLC9B2,LAMTOR3,TMEM33,GABRA2,GRIA1,ARRDC3,CLVS2,ENSCHIG00000022022,CRHBP,BLOC1S6,SORD,ITCH,CNST,NMNAT2,SNX20,CLIP3,CARTPT,ST8SIA2,HLA-DRA,VAPA,RAB27B,INPP5F,CFTR,SLC30A9,APPBP2,SNX18,VOPP1,VPS4B,RABGEF1,ACKR3,LZTS2,RAB11FIP2,VPS37A,ANO5,ITSN1,RAB3B,FNBP1L,IFNAR1,ZNRF2,STARD3NL,RAB21,SYT1,C2CD5,PHETA2,PRSS12,CHIC2,SEC24A,N4BP3,RAB…
GO:CC	intracellular vesicle	GO:0097708	1.30411e-10	9.88469	1039	4550	401	15912	CXCR4,EPHA4,STX12,MREG,SYT11,ANP32E,VPS45,ELAPOR1,NAPEPLD,IGF1,SLC9B2,LAMTOR3,TMEM33,GABRA2,GRIA1,ARRDC3,CLVS2,ENSCHIG00000022022,CRHBP,BLOC1S6,ITCH,CNST,NMNAT2,SNX20,CLIP3,CARTPT,ST8SIA2,HLA-DRA,RAB27B,INPP5F,CFTR,SLC30A9,APPBP2,SNX18,VOPP1,VPS4B,RABGEF1,ACKR3,RAB11FIP2,VPS37A,ITSN1,RAB3B,FNBP1L,IFNAR1,ZNRF2,STARD3NL,RAB21,SYT1,C2CD5,PHETA2,PRSS12,CHIC2,SEC24A,N4BP3,RAB14,C9ORF72,VPS13A,FYN,SNX3…
GO:CC	cytoplasmic vesicle	GO:0031410	1.3089e-10	9.88309	1036	4550	400	15912	CXCR4,EPHA4,STX12,MREG,SYT11,ANP32E,VPS45,ELAPOR1,NAPEPLD,IGF1,SLC9B2,LAMTOR3,TMEM33,GABRA2,GRIA1,ARRDC3,CLVS2,ENSCHIG00000022022,CRHBP,BLOC1S6,ITCH,CNST,NMNAT2,SNX20,CLIP3,CARTPT,ST8SIA2,HLA-DRA,RAB27B,INPP5F,CFTR,SLC30A9,APPBP2,SNX18,VOPP1,VPS4B,RABGEF1,ACKR3,RAB11FIP2,VPS37A,ITSN1,RAB3B,FNBP1L,IFNAR1,ZNRF2,STARD3NL,RAB21,SYT1,C2CD5,PHETA2,PRSS12,CHIC2,SEC24A,N4BP3,RAB14,C9ORF72,VPS13A,FYN,SNX3…
GO:CC	synapse	GO:0045202	2.78887e-09	8.55457	657	4550	267	15912	RAPGEF4,EPHA4,SYT11,OLFM3,LRRC4,SLC9B2,GABRG1,GABRA2,GRIA1,GABRA6,CRHBP,HOMER1,SPART,CACNB2,NMNAT2,SNTB2,CHRNB1,MPP2,CARTPT,LRRTM3,LYPD1,GRIA2,ATP2B2,EPB41L3,EIF3A,ANK3,SHANK2,ITSN1,RAB3B,SYT1,EPS8,GRIN2B,CACNA1C,PRSS12,GABRB2,CYFIP2,PURA,PLAA,FYN,GRM1,ARID1B,QKI,GJD2,STON2,RIMS1,LIN7C,PLEKHG5,GLRB,GLG1,BAIAP2,PAFAH1B1,GAD1,ENSCHIG00000010440,FBXL20,DAG1,DLG1,PLPPR4,PDE4B,DNAJC6,PPT1,DGKB,SNAP25,…
GO:CC	Golgi apparatus	GO:0005794	5.1434e-09	8.28875	956	4550	366	15912	CD36,SLC35A5,SYT11,VPS45,ELAPOR1,OLFM3,NAPEPLD,JAKMIP2,GALNTL6,CLVS2,TMEM87A,FGF7,GCC2,GOLGA1,EHF,CNST,NMNAT2,SLC10A7,CLIP3,PIK3R1,ST8SIA2,GOLGA5,VAPA,RAB27B,PRKG1,VTI1A,SEC23IP,HEPACAM2,PAQR3,YIPF4,RNF125,MARF1,CCDC186,HOOK3,RAB21,SYT1,PHETA2,ATP8A1,CHIC2,SEC24A,ARF1,RAB14,GCNT1,VPS13A,CERT1,SEMA6D,CREG2,BIRC6,NBEA,RAB2A,ARFGEF1,LYN,ACSL3,B3GNT6,RAB6A,CBL,GLG1,TMC8,B3GALT1,MMD,ENSCHIG00000010440…
GO:CC	cell-cell junction	GO:0005911	9.01342e-09	8.04511	321	4550	147	15912	CLDN1,CLDN18,IQGAP3,CD53,GJA1,CDH24,PARD3,ATP1B1,PIK3R1,MAGI1,VAPA,UBN1,CLDN16,APC,LCP2,CD2AP,DSG2,EPB41L3,ANK3,KLHL24,TIAM1,GJD2,CCDC85A,CLIC4,TRPC4,LIN7C,AMOTL1,PLEKHG5,NPHS2,ACTG1,FRMD5,DAG1,RAP1B,DLG1,SLC2A2,PKD2,RANGRF,PTPRJ,PIKFYVE,CASK,DSG1,SSX2IP,TWF1,FRS2,RAP2B,WDR1,CTNNA1,PTPRK,CLDN20,AJUBA,STRN,FRMD4A,ENSCHIG00000018589,CLDN17,ECT2,THEMIS,FLRT3,CRB1,PECAM1,PNN,ADD3,PANX3,DSP,CDH2,HEPAC…
GO:CC	cell projection	GO:0042995	2.4395e-08	7.6127	1203	4550	443	15912	KITLG,CCT8,ARL13B,ATP6V1A,ABI2,EPHA4,SYT11,LRRC4,CEP41,BBS7,SLC9B2,GABRA2,GRIA1,ATG5,HOMER1,BLOC1S6,DAAM1,SLC1A2,CDC42BPA,ATP1B1,SLC7A11,RAP1GAP2,MPP2,MAGI1,TBCC,RIPOR2,INPP5F,ADGRL1,APC,TMEM107,TTLL6,CD2AP,DNAH8,EPB41L3,TRAF3IP1,SFPQ,CPEB3,ANK3,SHANK2,RIN1,ITSN1,CDC14A,BRAF,PDE1C,RAB21,SYT1,C2CD5,EPS8,TTLL8,PRSS12,PURA,TXNDC15,N4BP3,C9ORF72,VPS13A,DYRK1A,FYN,GRM1,HIF1A,STON2,TLN2,NIN,MERTK,CLIC4…
GO:CC	plasma membrane bounded cell projection	GO:0120025	6.94259e-08	7.15848	1155	4550	425	15912	KITLG,CCT8,ARL13B,ATP6V1A,ABI2,EPHA4,SYT11,LRRC4,CEP41,BBS7,SLC9B2,GABRA2,GRIA1,ATG5,HOMER1,BLOC1S6,DAAM1,SLC1A2,CDC42BPA,ATP1B1,SLC7A11,RAP1GAP2,MPP2,TBCC,RIPOR2,INPP5F,ADGRL1,APC,TMEM107,TTLL6,CD2AP,DNAH8,EPB41L3,TRAF3IP1,SFPQ,CPEB3,ANK3,SHANK2,RIN1,ITSN1,CDC14A,BRAF,PDE1C,RAB21,SYT1,C2CD5,EPS8,TTLL8,PRSS12,PURA,TXNDC15,N4BP3,C9ORF72,VPS13A,DYRK1A,FYN,GRM1,HIF1A,STON2,TLN2,NIN,MERTK,CLIC4,ABI1,…
GO:CC	endosome	GO:0005768	5.3427e-07	6.27224	526	4550	213	15912	CXCR4,EPHA4,MREG,SYT11,VPS45,ELAPOR1,NAPEPLD,SLC9B2,LAMTOR3,GRIA1,ARRDC3,CLVS2,ENSCHIG00000022022,BLOC1S6,ITCH,NMNAT2,SNX20,CLIP3,ST8SIA2,HLA-DRA,RAB27B,INPP5F,CFTR,VOPP1,VPS4B,RABGEF1,ACKR3,RAB11FIP2,VPS37A,IFNAR1,STARD3NL,RAB21,PHETA2,RAB14,C9ORF72,VPS13A,FYN,SNX3,BIRC6,RAB22A,RABEP1,TRAK1,GPR15,STAM2,AP3D1,GNPNAT1,PIP4P1,NDFIP2,CLTC,WDR48,ABHD6,PLD1,AP1G1,PIKFYVE,RELCH,SNX25,PICALM,ATP13A2,SNX…
GO:CC	axon	GO:0030424	1.15089e-06	5.93897	259	4550	118	15912	EPHA4,GABRA2,GRIA1,HOMER1,BLOC1S6,SLC1A2,INPP5F,ADGRL1,EPB41L3,ANK3,ITSN1,RAB21,SYT1,PRSS12,N4BP3,C9ORF72,DYRK1A,HIF1A,NIN,KCNA4,PAFAH1B1,GAD1,DAG1,TRAK1,DLG1,UHMK1,PPT1,AP3D1,SNAP25,STMN2,KCNC1,BDNF,CCSAP,SYT7,VSTM5,SYP,ENSCHIG00000026624,PTPRK,MYO9A,OTX2,SPTBN1,ALCAM,SLC8A2,TANC1,TSPOAP1,BSN,NCAM2,CD200,SLC4A10,ERMN,MAP2,KCNA3,ADGRL2,PPFIA2,MAP3K12,NFIB,FLRT3,EXOC8,AP3M1,NEFM,SPAST,PRKCB,SHTN1,…
GO:CC	neuron projection	GO:0043005	2.08958e-06	5.67994	554	4550	220	15912	EPHA4,SYT11,LRRC4,GABRA2,GRIA1,HOMER1,BLOC1S6,SLC1A2,RAP1GAP2,MPP2,TBCC,RIPOR2,INPP5F,ADGRL1,EPB41L3,SFPQ,CPEB3,ANK3,SHANK2,RIN1,ITSN1,CDC14A,BRAF,RAB21,SYT1,EPS8,PRSS12,PURA,N4BP3,C9ORF72,DYRK1A,FYN,GRM1,HIF1A,STON2,NIN,ABI1,AGO2,KCNA4,MARK1,BAIAP2,PAFAH1B1,GAD1,ENSCHIG00000010440,DAG1,TRAK1,DLG1,UHMK1,AMIGO1,PDE4B,PPT1,TPH2,AP3D1,GABBR2,SNAP25,STMN2,KCNC1,BDNF,CCSAP,SYT7,VSTM5,ATP13A2,SYP,GNAT2…
GO:CC	presynapse	GO:0098793	5.47031e-06	5.26199	202	4550	95	15912	EPHA4,SLC9B2,GRIA1,CACNB2,ATP2B2,ITSN1,RAB3B,SYT1,PRSS12,STON2,RIMS1,LIN7C,PLEKHG5,GAD1,ENSCHIG00000010440,FBXL20,PDE4B,DNAJC6,PPT1,SNAP25,SYT7,SYP,ATP2B3,SLC4A8,PTPRS,CLCN3,ENSCHIG00000015151,PCDH17,SLC8A2,TANC1,TSPOAP1,BSN,SLC4A10,KCNJ3,ENSCHIG00000013367,HTR1B,SCAMP1,FCHO2,SV2B,SYNPR,SYT4,RGS7BP,PRKCB,ROR1,GRM3,APP,FZD3,PPP3CC,NTRK2,CNR1,ENSCHIG00000004225,NF1,NDEL1,CTNNB1,CADPS2,RAB3C,ENSCHIG…
GO:CC	bounding membrane of organelle	GO:0098588	9.96018e-06	5.00173	923	4550	338	15912	ARL13B,SLC35A5,EPHA4,MREG,VPS45,NAPEPLD,SLC9B2,LAMTOR3,GRIA1,GALNTL6,STX17,CLVS2,ENSCHIG00000022022,TMEM87A,SPART,SLC10A7,SNX20,CLIP3,GOLGA5,HLA-DRA,VAPA,RAB27B,GPR137B,CFTR,VPS4B,RNF152,SEH1L,RNF125,VPS37A,TOMM20,STARD3NL,RAB21,SYT1,SEC24A,RAB14,GCNT1,VPS13A,ENSCHIG00000018293,SNX3,RAB8B,ACBD5,JPH1,ARFGEF1,B3GNT6,RAB6A,GLG1,B3GALT1,ENSCHIG00000010440,EPN2,ATF2,STAM2,MTX1,SEC22B,TMED5,BET1,GHRHR,…
GO:CC	whole membrane	GO:0098805	1.40678e-05	4.85177	756	4550	283	15912	EPHA4,STX12,MREG,VPS45,NAPEPLD,SLC9B2,LAMTOR3,GRIA1,STX17,CLVS2,ATG5,ENSCHIG00000022022,SPART,SLC1A2,SNX20,CLIP3,HLA-DRA,RAB27B,ENSCHIG00000015705,GPR137B,CFTR,LCP2,VPS4B,RNF152,SEH1L,VPS37A,TOMM20,STARD3NL,RAB21,SYT1,SEC24A,RAB14,VPS13A,FYN,ENSCHIG00000018293,SNX3,RAB8B,RHOQ,TRPC4,ACBD5,MAL2,LYN,CBL,NPHS2,ENSCHIG00000010440,ULK2,EPN2,DAG1,TGFBR2,DLG1,ATF2,STAM2,MTX1,SEC22B,PPT1,GHRHR,AP3D1,PIP4P…
GO:CC	plasma membrane region	GO:0098590	1.53388e-05	4.81421	653	4550	249	15912	CD36,ARL13B,ATP6V1A,CLDN1,EPHA4,LRRC4,SLC9B2,GABRG1,GABRA2,SLC4A4,GRIA1,GABRA6,SLC22A2,SLC1A2,ATP1B1,SLC7A11,CHRNB1,MPP2,RIPOR2,ENSCHIG00000015705,INPP5F,CFTR,APC,GRIA2,LCP2,EPB41L3,ACKR3,IDE,ANK3,SHANK2,ITSN1,RAB21,SYT1,C2CD5,EPS8,GRIN2B,GABRB2,CTSB,VLDLR,TRPC4,LIN7C,CBL,AMOTL1,GLRB,DAG1,TGFBR2,ENSCHIG00000011448,DLG1,SLC2A2,FN1,PLPPR4,MET,PKD2,ATP6V1B2,SNAP25,ENSCHIG00000022465,KCNC1,CLTC,RANGR…
GO:CC	nuclear body	GO:0016604	1.62763e-05	4.78845	596	4550	230	15912	PPIG,SNRNP40,HBP1,YARS2,NR3C1,SLU7,BCLAF1,ICE2,EPC1,NCOA2,ESRP1,GPATCH2,EXO1,NUFIP2,SRPK1,UBN1,ENSCHIG00000006638,TRIM25,ANGEL2,SRRM1,SFPQ,CDC14A,HIPK1,ARNT,NAMPT,RAPGEF5,CPSF6,HCFC2,BMP2K,STAG1,SATB1,HIF1A,RAB8B,AFF3,ZMYM2,SAP18,MTDH,NPAT,DYRK3,DENND1B,CREBRF,ICE1,TP53BP1,CBX5,POLDIP3,NUDT9,HMBOX1,RNF111,BDNF,HIPK3,API5,SRSF1,TRIP11,KCTD13,THRB,ENSCHIG00000017733,CSF1,DHX15,ATP6V0A1,SETBP1,FLI1,…
GO:CC	Golgi apparatus subcompartment	GO:0098791	2.68038e-05	4.5718	175	4550	83	15912	SYT11,ELAPOR1,CLVS2,TMEM87A,GCC2,GOLGA1,CNST,NMNAT2,SLC10A7,CLIP3,GOLGA5,RAB27B,RAB21,PHETA2,RAB14,GCNT1,BIRC6,NBEA,RAB6A,ENSCHIG00000010440,SNAP25,ARFIP1,RELCH,SMPD4,GSAP,MARCHF9,FAM91A1,SORL1,CHSY1,PLEKHA8,ARL1,SCAMP1,MGAT2,BPNT2,CLVS1,KLHL20,SCOC,SMPD3,C17ORF75,SCAMP2,RAB31,GGA2,CALN1,GOLGA7,CSGALNACT2,CHST2,ATP2C1,DENND5A,RAB29,MYO18A,GOLPH3,PRKD1,VRK1,AKAP9,SYT17,MLANA,RAB7B,B4GALT4,COG2,LRR…
GO:CC	organelle subcompartment	GO:0031984	3.49445e-05	4.45662	192	4550	89	15912	SYT11,ELAPOR1,CLVS2,TMEM87A,GCC2,GOLGA1,CNST,NMNAT2,SLC10A7,CLIP3,GOLGA5,RAB27B,RAB21,PHETA2,RAB14,GCNT1,BIRC6,NBEA,ASPH,RAB6A,ENSCHIG00000010440,SNAP25,ARFIP1,RELCH,SMPD4,GSAP,MARCHF9,FAM91A1,SORL1,KPNB1,CHSY1,LNPK,PLEKHA8,ARL1,SCAMP1,MGAT2,RAB10,BPNT2,CLVS1,KLHL20,SCOC,SMPD3,C17ORF75,SCAMP2,RAB31,GGA2,CALN1,GOLGA7,CSGALNACT2,CHST2,ATP2C1,DENND5A,RAB29,MYO18A,GOLPH3,PRKD1,VRK1,AKAP9,SYT17,MLANA,…
GO:CC	postsynapse	GO:0098794	0.000170123	3.76924	279	4550	118	15912	SYT11,LRRC4,GABRG1,GABRA2,GRIA1,GABRA6,HOMER1,CHRNB1,MPP2,GRIA2,ATP2B2,EPB41L3,EIF3A,SHANK2,EPS8,GRIN2B,CACNA1C,GABRB2,PURA,FYN,GRM1,LIN7C,GLRB,GLG1,DAG1,DLG1,PLPPR4,PDE4B,DNAJC6,SNAP25,ENSCHIG00000022465,BDNF,GRIA3,KCND3,CLSTN2,SPTBN1,PSMA7,RNF19A,SLC8A2,ENSCHIG00000026818,BSN,MAP2,PPFIA2,FLRT3,CACNG3,ADD3,GABRA1,UTRN,RGS7BP,VHL,CDH2,GRM3,GRID2,APP,NTRK2,ENSCHIG00000017824,ADAM10,ITGB1,SHANK1,NE…
GO:CC	perinuclear region of cytoplasm	GO:0048471	0.000216813	3.66392	370	4550	149	15912	FIGNL1,GOLGA1,PIK3R1,VAPA,DCUN1D3,KIF20B,APC,RAB3B,CYFIP2,CTSB,CERT1,CLIC4,MTDH,KCNS2,UBR5,ARFGEF1,LYN,ACSL3,ATP6V0A2,PAFAH1B1,ENSCHIG00000010440,DLG1,SLC30A7,ENSCHIG00000016989,UBQLN1,NDFIP2,SNAP25,PSMF1,STMN2,BDNF,CSF1,CAV2,PIKFYVE,ATP6V0A1,TNKS2,PICALM,SYP,TWF1,EIF4E,ANXA4,PUM2,SNX5,SEC23B,YWHAB,TMEM192,OSBPL7,TPPP,EGFR,EIF4A2,S100B,PRKRA,OSBPL3,STING1,ABCA1,TMEM100,RAD51C,CALCOCO2,EXOC8,RAP1A…
GO:CC	transcription regulator complex	GO:0005667	0.000316148	3.50011	302	4550	125	15912	DR1,LEF1,TBPL1,ENSCHIG00000027081,GTF2H3,MIER1,FOXF2,SFPQ,ENSCHIG00000027121,ETS1,ARNT,PBX1,SP1,NFYB,ATF4,RBPJ,GATAD2A,ENSCHIG00000012659,HIF1A,GTF2A1,DACH1,TAF3,YAP1,PRDM16,ASCC2,RBL2,ERCC3,CBX5,LIN52,MEIS1,C1D,SMAD9,E2F5,HOXB9,PRDM10,SMAD4,TCF7L2,E2F7,AJUBA,HNRNPU,SATB2,SOX9,NEUROD1,CREB1,SMAD5,ANKRD1,E2F8,GTF3C6,SMAD3,ENSCHIG00000021273,SOX4,TAF8,ENSCHIG00000020965,HES6,ING2,RBM14,GFI1,POU2F1,…
GO:CC	somatodendritic compartment	GO:0036477	0.000559081	3.25253	299	4550	123	15912	EPHA4,SYT11,LRRC4,GABRA2,GRIA1,MPP2,INPP5F,SFPQ,SHANK2,RIN1,PRSS12,PURA,N4BP3,C9ORF72,DYRK1A,FYN,GRM1,NIN,AGO2,MARK1,UHMK1,AMIGO1,PDE4B,PPT1,SNAP25,STMN2,KCNC1,BDNF,PICALM,SYT7,VSTM5,ATP13A2,KCND3,SLC4A8,PTPRK,SLC22A3,HNRNPU,SEZ6L,ALCAM,TANC1,BSN,CD200,SLC4A10,ERMN,MAP2,TMEM50A,PPFIA2,ASCL1,IAPP,LDLR,TMEM100,CHL1,CACNG3,SHTN1,SLC6A1,CNNM1,PRKAA2,GRM3,GRID2,APP,FZD3,ENSCHIG00000017824,APOB,ITGB1,G…
GO:CC	trans-Golgi network	GO:0005802	0.000858735	3.06614	122	4550	59	15912	SYT11,ELAPOR1,CLVS2,GCC2,GOLGA1,CNST,NMNAT2,SLC10A7,CLIP3,RAB21,PHETA2,RAB14,GCNT1,BIRC6,NBEA,RAB6A,ENSCHIG00000010440,SNAP25,ARFIP1,RELCH,SMPD4,GSAP,MARCHF9,FAM91A1,SORL1,PLEKHA8,ARL1,SCAMP1,BPNT2,CLVS1,KLHL20,SCOC,C17ORF75,SCAMP2,RAB31,GGA2,CALN1,CHST2,ATP2C1,DENND5A,RAB29,MYO18A,GOLPH3,PRKD1,SYT17,MLANA,RAB7B,LRRK2,FUT9,FUT4,ATP7B,OPTN,AZIN2,TBC1D23,VPS54,YIPF1,RGS20,STX4,LGR5
GO:CC	early endosome	GO:0005769	0.00107895	2.967	202	4550	88	15912	CXCR4,EPHA4,NAPEPLD,CLVS2,ITCH,SNX20,CLIP3,ST8SIA2,INPP5F,CFTR,RABGEF1,RAB21,PHETA2,RAB14,SNX3,RAB22A,RABEP1,TRAK1,STAM2,PIKFYVE,PICALM,SNX27,SNX13,UHRF1BP1L,SNX2,CLCN3,PLA2G4E,SNX5,PMEPA1,SORL1,RABGAP1L,HSPD1,EGFR,EPHA3,NIPA2,MARCHF1,KDR,LDLR,HAVCR2,SLC39A14,STAM,CLVS1,PRDX3,RAB31,GGA2,EEA1,ZFYVE16,APP,SLC1A1,NTRK2,F2R,PTPN1,SNX16,UVRAG,RAB29,FZD5,KIAA0319,APPL2,ENSCHIG00000008108,GPR107,SORT1,P…
GO:CC	cell leading edge	GO:0031252	0.00130602	2.88405	254	4550	106	15912	KITLG,CXCR4,ABI2,GRIA1,SLC1A2,CDC42BPA,MPP2,RIPOR2,APC,CD2AP,EPB41L3,ITSN1,C2CD5,EPS8,ARF1,JMY,TLN2,ABI1,AMOTL1,PLEKHG5,BAIAP2,PAFAH1B1,DAG1,PKD2,ATP6V1B2,STMN2,KCNC1,DOCK8,PLEKHA1,SSX2IP,CDK6,TWF1,CTNNA1,SNX2,PALLD,PTPRK,AJUBA,PLEKHH2,SPTBN1,DGKZ,CAPRIN1,PARVA,CORO1C,VASP,ARHGAP31,PIK3CA,S100B,TRPM7,PLEK,FER,CCDC88A,SHTN1,CDH2,LIMK1,CDC42BPG,PKN2,ITGB1,SRC,RDX,RAPH1,STX2,NDEL1,CTNNB1,PTK2B,FAM10…
GO:CC	endoplasmic reticulum	GO:0005783	0.00142311	2.84676	896	4550	316	15912	ADIPOQ,RHBDD1,DHCR24,RAP1GDS1,TMEM33,GRIA1,TXNDC16,HACD3,ENSCHIG00000005130,TGM2,GLYATL2,FMO2,SLC10A7,CYB5B,PIGW,PIK3R1,VAPA,CFTR,SLC30A9,CAMLG,YIPF4,TMEM64,KDSR,RNF125,TMEM159,RNF170,SPCS3,SAMD8,HACD2,CACNA2D1,ATP8A1,CDS1,TMEM129,RASGRF2,USP25,CERT1,CREG2,MTDH,JPH1,CYP7B1,ASPH,ACSL3,SGPP2,EDEM3,TMC8,ERN1,MTMR12,ELOVL7,ARHGAP5,ENSCHIG00000008804,DLG1,SEC62,TMED5,CPED1,MSRB3,ELOVL6,PKD2,SRP72,UBQL…
GO:CC	glutamatergic synapse	GO:0098978	0.00147949	2.82989	129	4550	61	15912	EPHA4,LRRC4,GRIA1,HOMER1,MPP2,LRRTM3,ATP2B2,PURA,GRM1,FBXL20,DLG1,PLPPR4,SNAP25,SYT7,SLC4A8,CLSTN2,PTPRS,CPLX2,PCDH17,CACNG5,TSPOAP1,BSN,ENSCHIG00000013367,FLRT3,ERBIN,CACNG3,RAP1A,RGS7BP,VHL,GRID2,PPP3CC,ENSCHIG00000017824,ADAM10,ITGB1,SHANK1,CADPS2,EPHA7,NTNG1,AKAP9,ENSCHIG00000022037,PTPRD,PLAT,STX3,NRP2,ACTBL2,ACTC1,PPP3CB,PAK2,PPP3CA,ELAVL1,STXBP1,CALY,TNR,CDH11,STX4,PRKAR2B,APBA1,ADCY1,SH3G…
GO:CC	dendritic tree	GO:0097447	0.00167307	2.77649	201	4550	87	15912	EPHA4,SYT11,LRRC4,GABRA2,GRIA1,MPP2,INPP5F,SFPQ,SHANK2,RIN1,PRSS12,PURA,N4BP3,DYRK1A,FYN,GRM1,NIN,AGO2,MARK1,UHMK1,AMIGO1,PDE4B,PPT1,BDNF,SYT7,VSTM5,KCND3,SLC4A8,PTPRK,HNRNPU,ALCAM,TANC1,BSN,SLC4A10,MAP2,PPFIA2,CHL1,CNNM1,PRKAA2,GRM3,GRID2,APP,FZD3,ENSCHIG00000017824,ITGB1,GNAO1,SHANK1,NF1,SEZ6,MYH10,ENSCHIG00000019792,IFT57,HTR2A,IL6ST,LRRK2,KCNB1,STX3,KCNE3,TNN,DBNL,KCNA2,ELAVL4,CAMK2A,CALB1,EN…
GO:CC	dendrite	GO:0030425	0.00167307	2.77649	201	4550	87	15912	EPHA4,SYT11,LRRC4,GABRA2,GRIA1,MPP2,INPP5F,SFPQ,SHANK2,RIN1,PRSS12,PURA,N4BP3,DYRK1A,FYN,GRM1,NIN,AGO2,MARK1,UHMK1,AMIGO1,PDE4B,PPT1,BDNF,SYT7,VSTM5,KCND3,SLC4A8,PTPRK,HNRNPU,ALCAM,TANC1,BSN,SLC4A10,MAP2,PPFIA2,CHL1,CNNM1,PRKAA2,GRM3,GRID2,APP,FZD3,ENSCHIG00000017824,ITGB1,GNAO1,SHANK1,NF1,SEZ6,MYH10,ENSCHIG00000019792,IFT57,HTR2A,IL6ST,LRRK2,KCNB1,STX3,KCNE3,TNN,DBNL,KCNA2,ELAVL4,CAMK2A,CALB1,EN…
GO:CC	intrinsic component of plasma membrane	GO:0031226	0.00240132	2.61955	659	4550	239	15912	OPRK1,CLDN1,TM4SF1,DPP10,EPHA4,SYT11,ELAPOR1,OLFM3,TM2D1,LRRC4,ANO6,ABCC9,GABRA2,GRIA1,TGM2,SLC1A2,ATP1B1,SLC10A7,CHRNB1,MPP2,ENSCHIG00000015705,ENSCHIG00000016601,CFTR,HCN1,DDR1,GLP1R,TMC7,SHANK2,LRRC8B,IFNAR1,EPS8,GRIN2B,RGMB,GABRB2,GRM1,KCNS2,LRP12,KCNA4,NPHS2,GLRB,TRPC3,TMC8,AMIGO1,PLPPR4,PKD2,GABBR2,KCNC1,NCF2,HHIP,ABCC11,KCNJ2,ABHD6,CD19,CAV2,C6,GRIA3,KCND3,NOTCH2,MPZL1,SLC2A13,CLSTN2,PTPRS…
GO:CC	transferase complex	GO:1990234	0.0040387	2.39376	530	4550	196	15912	DCUN1D1,PHC3,EPC2,DHDDS,DR1,ENSCHIG00000013246,DCAF12,TBPL1,UBR1,ENSCHIG00000027081,EPC1,TRIM21,GTF2H3,ENC1,RNF40,KANSL1L,UBAP2L,NAA50,BRPF3,FBXL19,POLR3E,ENSCHIG00000027121,GLMN,PRKAG2,KLHL24,HCFC2,AEBP2,MAT2B,C9ORF72,KAT2B,GTF2A1,NAA30,NAA16,TAF3,ENSCHIG00000011390,POLR2C,GAN,ERCC3,ENSCHIG00000008824,CBX5,CAND1,SPTLC3,UBE4A,DTL,KCTD13,IKBKG,CBX8,FBXO33,JARID2,UBR2,ASH2L,JADE3,CDK6,UBE2D2,ARIH1,…
GO:CC	transport vesicle	GO:0030133	0.00521888	2.28242	158	4550	70	15912	IGF1,SLC9B2,GRIA1,CNST,RAB27B,RAB3B,SYT1,SEC24A,STON2,APH1B,RAB6A,ENSCHIG00000010440,SEC22B,PDE4B,PPT1,SNAP25,CRISPLD2,CLTC,CAV2,AP1G1,PICALM,SYT7,ATP13A2,SYP,AP1AR,CLCN3,SEC23B,SYT13,SORL1,RASSF9,NTS,SCAMP1,RAB10,SV2B,SYNPR,ENSCHIG00000016809,TMEM168,APP,TMEM30A,ENSCHIG00000004225,NDEL1,SEC23A,SEC31A,RAB3C,ENSCHIG00000021578,SYT12,ENSCHIG00000016030,ENSCHIG00000024173,SORT1,SSPN,GRIN2A,SYTL2,LRR…
GO:CC	integral component of plasma membrane	GO:0005887	0.00639855	2.19392	611	4550	221	15912	OPRK1,CLDN1,TM4SF1,DPP10,EPHA4,SYT11,ELAPOR1,OLFM3,TM2D1,LRRC4,ANO6,ABCC9,GABRA2,GRIA1,SLC1A2,ATP1B1,CHRNB1,ENSCHIG00000015705,ENSCHIG00000016601,CFTR,HCN1,DDR1,GLP1R,TMC7,SHANK2,LRRC8B,IFNAR1,EPS8,GRIN2B,GABRB2,GRM1,KCNS2,LRP12,KCNA4,GLRB,TRPC3,TMC8,AMIGO1,PLPPR4,PKD2,GABBR2,KCNC1,NCF2,HHIP,ABCC11,KCNJ2,ABHD6,CD19,CAV2,C6,GRIA3,KCND3,NOTCH2,MPZL1,SLC2A13,CLSTN2,PTPRS,LRRC8E,LPAR1,IFNLR1,PCDH17,T…
GO:CC	Golgi membrane	GO:0000139	0.00649467	2.18744	318	4550	125	15912	SLC35A5,VPS45,GALNTL6,TMEM87A,SLC10A7,CLIP3,GOLGA5,VAPA,RNF125,RAB21,SEC24A,RAB14,GCNT1,ARFGEF1,B3GNT6,RAB6A,GLG1,B3GALT1,SEC22B,BET1,CHST11,MANEA,NDFIP2,ARFIP1,CAV2,ENSCHIG00000021909,SLC35A3,ENSCHIG00000021309,GNPTAB,CLSTN2,GALNT10,MGAT1,HACE1,UST,GALNT16,SEC23B,PMEPA1,ACER3,SORL1,ARCN1,MGAT5,CHSY1,B3GNT5,GOLIM4,A4GNT,MANEAL,MGAT2,BPNT2,UBIAD1,SCOC,SCAMP2,NDST3,ZDHHC20,RAB31,CUX1,KDELR2,EMP2,CA…
GO:CC	Schaffer collateral - CA1 synapse	GO:0098685	0.00654253	2.18425	37	4550	23	15912	EPHA4,LRRC4,FYN,GRM1,BAIAP2,FBXL20,DGKB,CASK,PTPRS,BSN,CACNG3,AKAP12,CTNNB1,ENSCHIG00000022037,PLAT,CAMK2A,NEFL,INA,PPP3CA,TNR,CDH11,APBA1,GIPC1
GO:CC	neuronal cell body	GO:0043025	0.0086671	2.06213	160	4550	70	15912	GABRA2,GRIA1,INPP5F,RIN1,PURA,C9ORF72,AMIGO1,PPT1,STMN2,KCNC1,PICALM,SYT7,ATP13A2,SLC4A8,PTPRK,SLC22A3,SEZ6L,ALCAM,TANC1,CD200,SLC4A10,ERMN,MAP2,TMEM50A,ASCL1,IAPP,TMEM100,SHTN1,SLC6A1,CNNM1,PRKAA2,APP,FZD3,APOB,SIRT2,KIF5C,SEZ6,NDEL1,MYH10,MYO10,SLC1A3,SYT5,IL6ST,LRIG2,SLC12A2,CIB1,LRRK2,KCNB1,KCNE3,TNN,DBNL,ATP1A2,KCNA2,ELAVL4,CALB1,PTPRF,EPM2A,DNER,ASIC2,MAPT,CTNND2,AZIN2,PSEN1,TOP1,CNTN2,RBFO…
GO:CC	synaptic membrane	GO:0097060	0.0100557	1.99759	155	4550	68	15912	EPHA4,LRRC4,GABRG1,GABRA2,GRIA1,GABRA6,CHRNB1,MPP2,GRIA2,SHANK2,SYT1,GRIN2B,GABRB2,LIN7C,GLRB,DAG1,DLG1,PLPPR4,SNAP25,ENSCHIG00000022465,SYT7,GRIA3,SYP,KCND3,SLC4A8,CLSTN2,PTPRS,PCDH17,KCNJ3,HTR1B,FLRT3,CACNG3,GABRA1,UTRN,RGS7BP,GRM3,GRID2,CNR1,ADAM10,ITGB1,SHANK1,NECTIN3,CHRNA7,CTNNB1,CADPS2,GABRP,ENSCHIG00000021578,ENSCHIG00000022255,RIMS4,ITGA3,GRIN2A,GRIK1,KCNB1,SLITRK3,CNTN1,ENSCHIG000000145…
GO:CC	membrane region	GO:0098589	0.0120574	1.91875	184	4550	78	15912	STX12,LAMTOR3,SLC1A2,CLIP3,ENSCHIG00000015705,LCP2,FYN,RHOQ,TRPC4,MAL2,LYN,CBL,NPHS2,DAG1,TGFBR2,DLG1,PPT1,RANGRF,CAV2,PIKFYVE,MAPK3,MAPK1,ENSCHIG00000026624,RAP2B,CTNNA1,ENSCHIG00000015151,PPP2R1B,ENSCHIG00000021641,CORO1C,PLPP1,EGFR,KDR,ABCA1,PECAM1,CDH2,EMP2,FAS,HK1,APP,PTCH1,F2R,ZAP70,XPO1,ITGB1,SRC,CTNNB1,ICAM1,STOM,SLC38A9,PPP2CA,TGFBR1,PACSIN2,INSR,TFPI,HTR2A,ITGAM,ARID3A,LRRK2,KCNE3,CAVIN…
GO:CC	microtubule organizing center	GO:0005815	0.0136939	1.86347	555	4550	201	15912	CCT8,ORC2,CEP41,BBS7,SLAIN2,HMMR,DCAF12,DAAM1,CEP68,RAP1GAP2,KIF20B,HEPACAM2,APC,TTLL6,SORBS1,ACTR8,VPS4B,CEP76,TRAF3IP1,LZTS2,HOOK3,VPS37A,CDC14A,HIPK1,PPP1R12A,C2CD5,CEP70,KAT2B,NIN,BIRC6,CLIC4,DYRK3,ARHGAP35,PAFAH1B1,ENSCHIG00000016989,PDE4B,PKD2,DCTN4,HMBOX1,DTL,HAUS1,CEP290,KIF24,CCDC170,TNKS2,SMAD4,ZNF12,CCSAP,CDKL5,SSX2IP,CDK6,EVC,PHAX,CNTLN,MARCKS,TGIF2,HNRNPU,NLRC5,UNC119,SPAG9,KIF2A,CCD…
GO:CC	nuclear membrane	GO:0031965	0.0150702	1.82188	185	4550	78	15912	PRICKLE1,HACD3,EPC1,AHCTF1,RAP1GAP2,NUP155,NUP153,NUP50,GCH1,TAF3,DNAJB2,TMC8,PAFAH1B1,ERN1,CLCA2,GHRHR,NUDT9,UNC50,SMPD4,ANXA4,PUM2,SLC30A1,TMEM120B,CMTM3,ARL6IP6,KPNB1,ACKR2,EPHA3,OSBPL3,SMAD3,SPAST,PLCD4,NDC1,CLCC1,OSBPL8,LEMD3,XPO1,PHF20,TOR1AIP1,PTGS2,NUP93,GTF3C3,MACO1,ENSCHIG00000024173,CDH5,TMEM97,AKAP6,NUP133,SCRN1,BRAP,RIF1,C2ORF42,TP53,TNKS,ANKRD17,TNRC18,AKIRIN1,SYNE2,LBR,SMAD1,ENSCHI…
GO:CC	postsynaptic density	GO:0014069	0.0165335	1.78164	110	4550	51	15912	SYT11,LRRC4,GRIA1,HOMER1,MPP2,EPB41L3,EIF3A,SHANK2,EPS8,CACNA1C,FYN,GRM1,DLG1,PLPPR4,PDE4B,DNAJC6,CLSTN2,SPTBN1,SLC8A2,BSN,MAP2,CACNG3,ADD3,RGS7BP,CDH2,GRM3,NTRK2,ADAM10,SHANK1,NECTIN3,MAP4,ENSCHIG00000022255,GRIN2A,DBNL,CAMK2A,BMPR2,CAP2,SYNGAP1,PDPK1,GAP43,CAMK2G,PAK2,DCLK1,NETO2,PCLO,ABHD17B,ITPR1,PRRT1,DLGAP1,SH2D5,ADCY1
GO:CC	asymmetric synapse	GO:0032279	0.0165335	1.78164	110	4550	51	15912	SYT11,LRRC4,GRIA1,HOMER1,MPP2,EPB41L3,EIF3A,SHANK2,EPS8,CACNA1C,FYN,GRM1,DLG1,PLPPR4,PDE4B,DNAJC6,CLSTN2,SPTBN1,SLC8A2,BSN,MAP2,CACNG3,ADD3,RGS7BP,CDH2,GRM3,NTRK2,ADAM10,SHANK1,NECTIN3,MAP4,ENSCHIG00000022255,GRIN2A,DBNL,CAMK2A,BMPR2,CAP2,SYNGAP1,PDPK1,GAP43,CAMK2G,PAK2,DCLK1,NETO2,PCLO,ABHD17B,ITPR1,PRRT1,DLGAP1,SH2D5,ADCY1
GO:CC	membrane raft	GO:0045121	0.0170927	1.76719	177	4550	75	15912	STX12,LAMTOR3,SLC1A2,CLIP3,ENSCHIG00000015705,LCP2,FYN,RHOQ,TRPC4,MAL2,LYN,CBL,NPHS2,DAG1,TGFBR2,DLG1,PPT1,RANGRF,CAV2,PIKFYVE,MAPK3,MAPK1,ENSCHIG00000026624,RAP2B,CTNNA1,ENSCHIG00000015151,PPP2R1B,CORO1C,PLPP1,EGFR,KDR,ABCA1,PECAM1,CDH2,EMP2,FAS,HK1,APP,PTCH1,F2R,ZAP70,ITGB1,SRC,CTNNB1,ICAM1,STOM,SLC38A9,PPP2CA,TGFBR1,PACSIN2,INSR,TFPI,HTR2A,ITGAM,ARID3A,LRRK2,KCNE3,CAVIN1,PLSCR1,TEK,ADAM17,BMPR…
GO:CC	PML body	GO:0016605	0.0179153	1.74678	63	4550	33	15912	ENSCHIG00000006638,HIPK1,SATB1,ZMYM2,CBX5,RNF111,HIPK3,CDK9,NR2C1,TP53INP1,KLHL20,CALCOCO2,SMC6,MRE11,RB1,TP53INP2,ZBTB16,N4BP1,RPA1,TERT,WDFY3,RNF4,CHEK2,TP53,TP73,KAT6A,PPARGC1A,PIAS1,SKI,MORC3,TOPBP1,HIPK2,MTOR
GO:CC	cell body	GO:0044297	0.0198179	1.70294	192	4550	80	15912	CCT8,GABRA2,GRIA1,SLC1A2,INPP5F,RIN1,BRAF,PURA,C9ORF72,FYN,AMIGO1,PPT1,STMN2,KCNC1,PICALM,SYT7,ATP13A2,SLC4A8,SLC2A13,PTPRK,SLC22A3,SEZ6L,ALCAM,TANC1,CD200,SLC4A10,ERMN,MAP2,TMEM50A,ASCL1,IAPP,TMEM100,ZPBP2,SHTN1,SLC6A1,CNNM1,PRKAA2,APP,FZD3,APOB,GNAO1,SIRT2,KIF5C,SEZ6,NDEL1,MYH10,MYO10,SLC1A3,SYT5,IL6ST,LRIG2,SLC12A2,CIB1,LRRK2,KCNB1,KCNE3,TNN,DBNL,ATP1A2,KCNJ10,KCNA2,ELAVL4,CALB1,TUBB,PTPRF,CXA…
GO:CC	nuclear speck	GO:0016607	0.0202403	1.69378	280	4550	110	15912	PPIG,SNRNP40,HBP1,NR3C1,SLU7,BCLAF1,GPATCH2,SRPK1,SRRM1,SFPQ,HIPK1,NAMPT,CPSF6,BMP2K,HIF1A,SAP18,DYRK3,DENND1B,POLDIP3,BDNF,API5,SRSF1,TRIP11,ENSCHIG00000017733,DHX15,ATP6V0A1,SRPK2,E2F7,CCNL1,DGKZ,HNRNPU,NR4A2,TKT,SON,GADD45A,PPP4R3B,JADE1,NSRP1,ERBIN,PNN,CDC5L,CD2BP2,FAM76B,RBBP6,RREB1,CDYL,LIMK1,RBM14,PRKAA2,STK17A,CKAP4,WBP4,ZBTB16,SETD1B,NCBP3,TERT,RBM11,SGK1,VIRMA,FAM107A,PACSIN2,SURF2,MECO…
GO:CC	membrane microdomain	GO:0098857	0.0213598	1.6704	178	4550	75	15912	STX12,LAMTOR3,SLC1A2,CLIP3,ENSCHIG00000015705,LCP2,FYN,RHOQ,TRPC4,MAL2,LYN,CBL,NPHS2,DAG1,TGFBR2,DLG1,PPT1,RANGRF,CAV2,PIKFYVE,MAPK3,MAPK1,ENSCHIG00000026624,RAP2B,CTNNA1,ENSCHIG00000015151,PPP2R1B,CORO1C,PLPP1,EGFR,KDR,ABCA1,PECAM1,CDH2,EMP2,FAS,HK1,APP,PTCH1,F2R,ZAP70,ITGB1,SRC,CTNNB1,ICAM1,STOM,SLC38A9,PPP2CA,TGFBR1,PACSIN2,INSR,TFPI,HTR2A,ITGAM,ARID3A,LRRK2,KCNE3,CAVIN1,PLSCR1,TEK,ADAM17,BMPR…
GO:CC	cytoskeleton	GO:0005856	0.0230473	1.63738	1611	4550	527	15912	KITLG,CCT8,ARL13B,ORC2,ABI2,PSRC1,KANK4,CEP41,GAS2L3,NUAK1,BBS7,SYNPO2,TBCK,TRMT10A,SLAIN2,NR3C1,HMMR,DCAF12,TUBE1,ATG5,DAAM1,CEP68,ENSCHIG00000017508,ABRA,CDC42BPA,SNTB2,RAP1GAP2,RIPOR2,ONECUT2,KIF20B,KIF11,PDLIM3,HEPACAM2,SLC30A9,APC,TTLL6,ENSCHIG00000023712,SORBS1,ACTR8,CD2AP,DNAH8,VPS4B,MYL12B,CEP76,EPB41L3,TRAF3IP1,SBDS,LZTS2,HOOK3,VPS37A,POLB,ANK3,SHANK2,GAS2,HOOK1,FNBP1L,CDC14A,HIPK1,PPP1R…
GO:CC	centrosome	GO:0005813	0.0239216	1.62121	451	4550	166	15912	CCT8,ORC2,CEP41,BBS7,SLAIN2,HMMR,DCAF12,CEP68,RAP1GAP2,KIF20B,HEPACAM2,APC,SORBS1,ACTR8,VPS4B,CEP76,TRAF3IP1,LZTS2,HOOK3,VPS37A,CDC14A,HIPK1,PPP1R12A,C2CD5,CEP70,KAT2B,NIN,CLIC4,DYRK3,PAFAH1B1,PDE4B,DCTN4,HMBOX1,DTL,HAUS1,CEP290,TNKS2,SMAD4,ZNF12,CCSAP,CDKL5,SSX2IP,CDK6,PHAX,CNTLN,MARCKS,TGIF2,HNRNPU,NLRC5,UNC119,SPAG9,KIF2A,CCDC14,ENSCHIG00000020516,ITGB6,HNMT,SASS6,GNAI1,TTC26,CETN3,PPP4R3B,KIF…
GO:CC	organelle membrane	GO:0031090	0.0250929	1.60045	1850	4550	599	15912	ARL13B,SLC35A5,XXYLT1,EPHA4,RHBDD1,MREG,VPS45,NAPEPLD,PRICKLE1,SLC9B2,LAMTOR3,TMEM33,GABRA2,GRIA1,GALNTL6,STX17,CLVS2,AFG1L,ENSCHIG00000022022,HACD3,TMEM87A,SPART,ENSCHIG00000005130,EPC1,TIMM8B,TMEM41B,AHCTF1,ATP1B1,FMO2,SLC10A7,SNX20,CLIP3,PIGW,RAP1GAP2,NUP155,GOLGA5,TMEM14A,HLA-DRA,VAPA,RAB27B,GPR137B,CFTR,APPBP2,SNX18,VOPP1,NUP153,VPS4B,RNF152,SEH1L,RNF125,TMEM159,RNF170,VPS37A,SPCS3,MCU,TOMM2…
GO:CC	nuclear envelope	GO:0005635	0.0284321	1.54619	282	4550	110	15912	NAPEPLD,PRICKLE1,TMEM33,XPO7,HACD3,EPC1,AHCTF1,RAP1GAP2,ENSCHIG00000023339,NUP155,NUP153,SEH1L,NUP50,GCH1,TAF3,DNAJB2,TMC8,PAFAH1B1,ERN1,CLCA2,GHRHR,NUDT9,MNS1,UNC50,TNKS2,MAPK3,SMPD4,EIF5A2,TMPO,ANXA4,PUM2,SORL1,SLC30A1,TMEM120B,CMTM3,ARL6IP6,KPNB1,ACKR2,EPHA3,OSBPL3,SMAD3,SPAST,PLCD4,NDC1,CLCC1,OSBPL8,LEMD3,APP,XPO1,PHF20,TOR1AIP1,PTGS2,CLGN,NUP93,GTF3C3,MACO1,ENSCHIG00000024173,NUP160,INSR,CDH…
GO:CC	postsynaptic specialization	GO:0099572	0.0294418	1.53104	123	4550	55	15912	SYT11,LRRC4,GABRA2,GRIA1,HOMER1,MPP2,EPB41L3,EIF3A,SHANK2,EPS8,CACNA1C,GABRB2,FYN,GRM1,DLG1,PLPPR4,PDE4B,DNAJC6,KCND3,CLSTN2,SPTBN1,SLC8A2,BSN,MAP2,CACNG3,ADD3,RGS7BP,CDH2,GRM3,NTRK2,ADAM10,SHANK1,NECTIN3,MAP4,ENSCHIG00000022255,GRIN2A,DBNL,SLITRK3,CAMK2A,BMPR2,CAP2,SYNGAP1,PDPK1,GAP43,CAMK2G,PAK2,DCLK1,NETO2,PCLO,ABHD17B,ITPR1,PRRT1,DLGAP1,SH2D5,ADCY1
GO:CC	microtubule cytoskeleton	GO:0015630	0.0333145	1.47737	896	4550	306	15912	CCT8,ORC2,PSRC1,KANK4,CEP41,GAS2L3,NUAK1,BBS7,TBCK,SLAIN2,NR3C1,HMMR,DCAF12,TUBE1,DAAM1,CEP68,ENSCHIG00000017508,RAP1GAP2,KIF20B,KIF11,HEPACAM2,APC,TTLL6,SORBS1,ACTR8,DNAH8,VPS4B,CEP76,TRAF3IP1,SBDS,LZTS2,HOOK3,VPS37A,POLB,HOOK1,CDC14A,HIPK1,PPP1R12A,C2CD5,TTLL8,CEP70,STAG1,KAT2B,NIN,BIRC6,CLIC4,TCP11L1,DYRK3,MAP9,POLR2C,ARHGAP35,PAFAH1B1,DLG1,ENSCHIG00000016989,PDE4B,PKD2,DCTN4,HMBOX1,DTL,CLTC,H…
GO:CC	intercalated disc	GO:0014704	0.0376322	1.42444	33	4550	20	15912	GJA1,ATP1B1,DSG2,ANK3,RANGRF,CTNNA1,DSP,CDH2,ITGB1,TMEM65,CTNNB1,CTNNA3,GJA5,VCL,DSC2,CXADR,SCN2A,TJP1,SCN1A,KCNA5
GO:CC	RNA polymerase II transcription regulator complex	GO:0090575	0.0416334	1.38056	116	4550	52	15912	DR1,LEF1,TBPL1,ENSCHIG00000027081,GTF2H3,SFPQ,ENSCHIG00000027121,ARNT,PBX1,NFYB,ATF4,HIF1A,GTF2A1,TAF3,YAP1,ASCC2,ERCC3,HOXB9,SMAD4,TCF7L2,HNRNPU,NEUROD1,CREB1,SMAD3,ENSCHIG00000021273,TAF8,ENSCHIG00000020965,ING2,POU2F1,TFDP2,TCF3,TLE4,RB1,TAF4,CEBPB,CEBPA,CTNNB1,PYGO2,VDR,CDK7,ATF1,TP53,ENSCHIG00000012368,JUN,NR5A1,NR5A2,E2F3,E2F6,CCNH,HIPK2,NR1H3,FOXH1
GO:CC	cell surface	GO:0009986	0.0449188	1.34757	459	4550	167	15912	CXCL10,ADIPOQ,CXCR4,KLRK1,CLEC7A,SLC4A4,GRIA1,SLC1A2,SLC7A11,PDGFC,HLA-DRA,CFTR,ADRA2B,PRLR,ACKR3,IDE,F3,WNT5B,CTSB,TYRO3,THBS1,CLIC4,TRPC4,DAG1,TGFBR2,GHRHR,ADGRG6,TNFRSF9,HHIP,AXL,ANPEP,CX3CR1,CD19,PLAU,PTPRJ,TNFRSF11A,PDGFA,PICALM,TGFBR3,NOTCH2,ADGRA3,CLSTN2,CLCN3,LPAR1,ENSCHIG00000015151,PTPRK,ENPP1,ANXA4,LRRC8A,SORL1,HNRNPU,VAMP4,ENSCHIG00000021641,HSPD1,ALCAM,ENSCHIG00000017892,ITGA1,BSN,EG…
GO:CC	lamellipodium	GO:0030027	0.0495988	1.30453	125	4550	55	15912	KITLG,ABI2,CDC42BPA,APC,ITSN1,ABI1,AMOTL1,PLEKHG5,DAG1,PKD2,STMN2,CTNNA1,SNX2,PALLD,AJUBA,PLEKHH2,DGKZ,PARVA,CORO1C,VASP,ARHGAP31,PIK3CA,FER,CCDC88A,SHTN1,CDH2,LIMK1,PKN2,ITGB1,RDX,STX2,CTNNB1,PTK2B,CIB1,CTNNA3,STX3,CYFIP1,CDC42BPB,DBNL,KCNA2,RAC2,SNX1,ABLIM1,PTPRM,SYNE2,ITGAV,WASF3,PTK2,CARMIL1,MYLK,WASL,STX4,ABI3,PLCG1,PARVB
KEGG	Adherens junction	KEGG:04520	3.26718e-07	6.48583	69	2272	45	7447	LEF1,PARD3,ENSCHIG00000023712,SORBS1,FYN,ACTG1,BAIAP2,TGFBR2,MET,SNAI2,PTPRJ,SMAD4,MAPK3,TCF7L2,MAPK1,SSX2IP,CTNNA1,TCF7L1,EGFR,FER,SMAD3,EP300,ENSCHIG00000013977,SRC,PTPN1,NECTIN3,CTNNB1,FGFR1,TGFBR1,NECTIN1,ENSCHIG00000024732,IGF1R,IQGAP1,INSR,CTNNA3,RAC2,VCL,PTPRM,ACTB,PTPRF,WASF3,NLK,WASL,TJP1,ENSCHIG00000022551
KEGG	Axon guidance	KEGG:04360	1.63137e-06	5.78745	173	2272	88	7447	CXCR4,EPHA4,LRRC4,NTN4,PARD3,PIK3R1,MYL12B,WNT5B,FYN,SEMA6D,TRPC4,ENAH,SSH1,PTPN11,TRPC3,NFATC3,NRAS,MET,PLXNC1,BMPR1B,RASA1,MAPK3,MAPK1,KRAS,NRP1,EPHA3,PIK3CA,SEMA3D,SEMA3A,GNAI1,ARHGEF12,EPHA6,LIMK1,GNAI3,EPHA5,ABLIM2,EFNA5,NCK1,FZD3,PPP3CC,PTCH1,ENSCHIG00000013977,ITGB1,SRC,SSH2,PDK1,EPHA7,NTNG1,ENSCHIG00000022255,SLIT1,SRGAP3,TRPC6,SEMA5A,ENSCHIG00000017301,ENSCHIG00000015779,RND1,SRGAP1,RAC2…
KEGG	MAPK signaling pathway	KEGG:04010	1.78907e-05	4.74737	280	2272	126	7447	KITLG,IGF1,LAMTOR3,MAPK10,FGF7,CACNB2,PDGFC,HGF,IKBKB,DUSP4,BRAF,CACNA2D1,DUSP6,CACNA1C,ATF4,RASGRF2,RRAS2,NFATC3,CRK,TGFBR2,RAP1B,ATF2,NRAS,MET,BDNF,MAP3K1,IKBKG,CSF1,RASA1,PDGFA,MAPK3,MAPK1,KRAS,PLA2G4E,SOS1,STK3,CACNG5,EGFR,MAP3K13,MAP3K20,ENSCHIG00000013367,GADD45A,MAP3K12,PTPRR,PDGFRA,KDR,MAP3K5,SRF,CACNG3,RAP1A,ELK4,PRKCB,VEGFA,FAS,CHUK,VEGFC,EFNA5,MAPK9,PPP3CC,NTRK2,MAP4K4,ENSCHIG000000220…
KEGG	Rap1 signaling pathway	KEGG:04015	1.96477e-05	4.70669	201	2272	96	7447	KITLG,RAPGEF4,IGF1,FGF7,PARD3,PDGFC,PIK3R1,MAGI1,HGF,PFN4,LCP2,BRAF,RAPGEF5,TIAM1,GRIN2B,TLN2,THBS1,ENAH,ACTG1,CRK,RAP1B,NRAS,MET,CSF1,PDGFA,MAPK3,MAPK1,KRAS,GNAQ,LPAR1,APBB1IP,VASP,ENSCHIG00000017892,EGFR,PIK3CA,ENSCHIG00000023971,GNAI1,DOCK4,PDGFRA,KDR,ITGAL,RAP1A,PRKCB,VEGFA,VEGFC,ADCY5,GNAI3,P2RY1,EFNA5,CNR1,F2R,ENSCHIG00000021423,ENSCHIG00000013977,ITGB1,SRC,GNAO1,PRKD1,CTNNB1,MAPK13,FGFR1,E…
KEGG	Ras signaling pathway	KEGG:04014	3.53723e-05	4.45134	224	2272	104	7447	KITLG,IGF1,MAPK10,GNG2,FGF7,PDGFC,PIK3R1,HGF,RASAL2,EXOC2,IKBKB,ETS1,RIN1,RAPGEF5,GNB4,TIAM1,GRIN2B,RASGRF2,ENSCHIG00000024417,RRAS2,PTPN11,RAP1B,NRAS,MET,BDNF,IKBKG,CSF1,PLA2G12A,PLD1,RASA1,PDGFA,MAPK3,MAPK1,KRAS,PLA2G4E,SOS1,EGFR,PLA1A,PIK3CA,PDGFRA,KDR,ENSCHIG00000007229,SHC4,RAP1A,PLA2G2F,PRKCB,VEGFA,CHUK,VEGFC,GNG5,RAB5B,EFNA5,MAPK9,NTRK2,ENSCHIG00000015660,ENSCHIG00000021423,ZAP70,ENSCHIG00…
KEGG	FoxO signaling pathway	KEGG:04068	8.14727e-05	4.08899	124	2272	64	7447	IGF1,GABARAPL1,CCNG2,MAPK10,HOMER1,PIK3R1,ENSCHIG00000006638,IKBKB,PRKAG2,BRAF,ENSCHIG00000018293,ENSCHIG00000021932,RBL2,TGFBR2,NRAS,SMAD4,MAPK3,MAPK1,KRAS,SOS1,EGFR,BCL6,PIK3CA,GADD45A,ENSCHIG00000019939,ENSCHIG00000024485,PRKAB2,SMAD3,CHUK,PRKAA2,EP300,KLF2,MAPK9,SOD2,FOXO1,SETD7,G6PC2,ENSCHIG00000025136,SGK1,STK4,MAPK13,TGFBR1,IGF1R,INSR,G6PC,GADD45B,ENSCHIG00000015779,FBXO32,ENSCHIG000000193…
KEGG	Prostate cancer	KEGG:05215	8.82802e-05	4.05414	95	2272	52	7447	IGF1,LEF1,PDGFC,PIK3R1,ENSCHIG00000006638,IKBKB,BRAF,ATF4,NFKBIA,NRAS,PLAU,IKBKG,PDGFA,MAPK3,TCF7L2,MAPK1,KRAS,SOS1,TCF7L1,EGFR,PIK3CA,CREB1,ENSCHIG00000019939,PDGFRA,CASP9,CHUK,EP300,FOXO1,RB1,ZEB1,CCNE2,CTNNB1,CREB5,FGFR1,ENSCHIG00000014133,IGF1R,PLAT,TMPRSS2,ENSCHIG00000015779,TP53,PDPK1,E2F3,CCND1,PDGFRB,SOS2,CCNE1,CREB3L2,HSP90B1,HSP90AB1,MAP2K2,MTOR,FGFR2
KEGG	Regulation of actin cytoskeleton	KEGG:04810	0.000220412	3.65677	207	2272	95	7447	CXCR4,ABI2,IQGAP3,FGF7,PIP4K2A,PDGFC,PIK3R1,APC,PFN4,ENSCHIG00000023712,MYL12B,BRAF,PPP1R12A,TIAM1,CYFIP2,RRAS2,ENAH,SSH1,ARHGAP35,ACTG1,BAIAP2,CRK,NCKAP1,FN1,NRAS,ENSCHIG00000012574,PIKFYVE,PDGFA,MAPK3,MAPK1,KRAS,LPAR1,SOS1,GIT1,ENSCHIG00000017892,ITGA1,EGFR,PIK3CA,ITGB6,PDGFRA,ARHGEF12,ITGAL,LIMK1,F2R,ENSCHIG00000013977,PPP1CB,ITGB1,SRC,RDX,GNA13,SSH2,MYH10,ENSCHIG00000017166,FGFR1,SCIN,ENSCHIG…
KEGG	Phospholipase D signaling pathway	KEGG:04072	0.000839575	3.07594	141	2272	68	7447	KITLG,RAPGEF4,PDGFC,PIK3R1,ARF1,FYN,LPAR6,RRAS2,PTPN11,NRAS,DGKB,DGKE,PLD1,PDGFA,MAPK3,MAPK1,KRAS,LPAR1,PLA2G4E,SOS1,DGKH,DGKZ,SPHK2,PLPP1,EGFR,PIK3CA,ENSCHIG00000022600,PDGFRA,CXCL8,SHC4,MS4A2,GRM2,ADCY5,ENSCHIG00000026275,GRM3,F2R,DNM3,GAB1,GNA13,PTK2B,SYK,GRM5,DGKG,INSR,PTGFR,ENSCHIG00000015779,PIK3CG,CYTH1,CYTH3,AGPAT5,LPAR3,F2,PLCG2,ENSCHIG00000027099,RALA,KIT,PDGFRB,SOS2,PLCB1,ADCY7,AGPAT1,…
KEGG	Glutamatergic synapse	KEGG:04724	0.00084148	3.07496	108	2272	55	7447	GRIA1,HOMER1,GNG2,SLC1A2,GRIA2,SHANK2,GNB4,SLC38A2,GRIN2B,CACNA1C,ENSCHIG00000024417,ENSCHIG00000022465,PLD1,MAPK3,GRIA3,MAPK1,GNAQ,PLA2G4E,GRK3,GLS,SLC38A3,KCNJ3,GNAI1,ENSCHIG00000007229,PRKCB,GRM2,GNG5,ADCY5,GNAI3,GRM3,SLC1A1,PPP3CC,ENSCHIG00000015660,GNAO1,SHANK1,SLC1A3,GRM5,SLC38A1,GRIN2A,GNG12,GRIK1,SLC17A6,PPP3CB,PPP3CA,PRKACA,ENSCHIG00000010479,CACNA1D,SLC1A7,PLCB1,ITPR1,DLGAP1,GRIK2,ADCY7…
KEGG	Pathways in cancer	KEGG:05200	0.000848636	3.07128	505	2272	199	7447	KITLG,CXCR4,IGF1,LEF1,MAPK10,GNG2,FGF7,HEY1,PIK3R1,MITF,GSTA4,ENSCHIG00000006638,HGF,APC,PPARD,IKBKB,ETS1,ARNT,IFNAR1,BRAF,ENSCHIG00000025853,SP1,GNB4,WNT5B,HIF1A,ENSCHIG00000024417,LPAR6,CBL,PLEKHG5,CRK,JAG2,NFKBIA,TGFBR2,FN1,NRAS,MET,HHIP,RARB,IKBKG,PLD1,LAMC2,TPM3,SMAD4,PDGFA,MAPK3,ENSCHIG00000020240,TCF7L2,MAPK1,NOTCH2,CDK6,KRAS,CTNNA1,NOTCH3,GNAQ,LPAR1,SOS1,PAX8,TCF7L1,EGFR,PIK3CA,ENSCHIG000…
KEGG	Endocytosis	KEGG:04144	0.0011347	2.94512	238	2272	104	7447	CXCR4,VPS45,ARAP2,ENSCHIG00000022022,SPART,PARD3,ITCH,VPS4B,RAB11FIP2,VPS37A,ARF1,SNX3,ASAP2,RAB22A,ARFGEF1,CBL,RABEP1,EPN2,ENSCHIG00000017907,TGFBR2,STAM2,CAPZA1,DNAJC6,ENSCHIG00000019252,CLTC,CAV2,PLD1,NEDD4L,WASHC4,ARFGAP3,GRK6,SNX2,SNX5,GRK3,CHMP6,GIT1,EGFR,CHMP2B,EPS15,ENSCHIG00000019939,PDGFRA,LDLR,RAB10,STAM,KIF5B,SMAD3,CBLB,RAB31,SH3GLB1,WIPF3,CAPZA2,EEA1,RAB5B,ZFYVE16,ENSCHIG00000017824,…
KEGG	Dopaminergic synapse	KEGG:04728	0.00213728	2.67014	126	2272	61	7447	MAPK10,GRIA1,GNG2,PPP2R5E,GRIA2,GNB4,GRIN2B,CACNA1C,ATF4,ENSCHIG00000024417,ATF2,ENSCHIG00000022465,PPP2R2C,GRIA3,PPP2R3B,GNAQ,PPP2R1B,KCNJ3,CREB1,GNAI1,ENSCHIG00000007229,KIF5B,PRKCB,GNG5,ADCY5,GNAI3,MAPK9,PPP3CC,ENSCHIG00000015660,ENSCHIG00000021423,PPP1CB,GNAO1,KIF5C,PPP2R5C,CREB5,ARRB1,MAPK13,ENSCHIG00000008011,PPP2CA,CACNA1B,ENSCHIG00000012302,GRIN2A,GNG12,CAMK2A,PPP3CB,CAMK2G,PPP3CA,PRKACA,…
KEGG	Glioma	KEGG:05214	0.00230136	2.63802	69	2272	38	7447	IGF1,PIK3R1,ENSCHIG00000006638,BRAF,NRAS,PDGFA,MAPK3,MAPK1,CDK6,KRAS,SOS1,CAMK1D,EGFR,PIK3CA,GADD45A,ENSCHIG00000019939,PDGFRA,SHC4,PRKCB,ENSCHIG00000021423,RB1,IGF1R,GADD45B,ENSCHIG00000015779,CAMK2A,TP53,CAMK2G,CAMK4,PLCG2,CALM3,E2F3,CCND1,PDGFRB,SOS2,BAK1,PLCG1,MAP2K2,MTOR
KEGG	Neurotrophin signaling pathway	KEGG:04722	0.0027614	2.55887	114	2272	56	7447	MAPK10,PIK3R1,IKBKB,BRAF,ATF4,ENSCHIG00000018293,PTPN11,CRK,NFKBIA,RAP1B,NRAS,BDNF,MAP3K1,MAPK3,MAPK1,FRS2,KRAS,SOS1,SH2B3,PIK3CA,MAP3K5,SHC4,RAP1A,MAPK9,NTRK2,ENSCHIG00000021423,ENSCHIG00000013977,GAB1,PRKCD,MAPK13,PRDM4,RPS6KA1,NTRK3,SORT1,ENSCHIG00000015779,CAMK2A,TP53,TP73,PDPK1,CAMK2G,JUN,CAMK4,RPS6KA5,KIDINS220,RAPGEF1,CRKL,PLCG2,CALM3,ZNF274,ENSCHIG00000023201,PSEN1,SOS2,MAPK8,PLCG1,MAP2K2…
KEGG	Wnt signaling pathway	KEGG:04310	0.00334532	2.47556	151	2272	70	7447	PRICKLE1,LEF1,MAPK10,DAAM1,MMP7,APC,SFRP2,PPARD,WNT5B,NFATC3,RSPO3,SMAD4,ENSCHIG00000020240,TCF7L2,TCF7L1,CXXC4,SMAD3,PRKCB,PRICKLE2,ROR1,ENSCHIG00000018521,ENSCHIG00000002251,EP300,ENSCHIG00000015329,MAPK9,FZD3,PPP3CC,BAMBI,FZD5,ENSCHIG00000017834,NOTUM,FBXW11,CTNNB1,ENSCHIG00000025136,TBL1XR1,INVS,DAAM2,DVL3,ZNRF3,RAC2,CAMK2A,RSPO4,TP53,SFRP1,PPP3CB,CAMK2G,JUN,FZD1,ENSCHIG00000022992,ENSCHIG000…
KEGG	Choline metabolism in cancer	KEGG:05231	0.00419739	2.37702	95	2272	48	7447	MAPK10,SLC22A2,PDGFC,PIK3R1,ENSCHIG00000023712,SP1,HIF1A,NRAS,DGKB,DGKE,PLD1,PDGFA,MAPK3,CHKA,MAPK1,KRAS,SLC44A1,SLC22A3,PLA2G4E,SOS1,DGKH,DGKZ,PLPP1,EGFR,PIK3CA,ENSCHIG00000022600,PDGFRA,PRKCB,ENSCHIG00000026275,MAPK9,SLC22A1,RPS6KB1,DGKG,ENSCHIG00000024732,ENSCHIG00000015779,RAC2,SLC22A5,PDPK1,JUN,WASF3,GPCPD1,PDGFRB,SOS2,MAPK8,CHPT1,PLCG1,MAP2K2,MTOR
KEGG	Renal cell carcinoma	KEGG:05211	0.00503616	2.2979	66	2272	36	7447	PIK3R1,HGF,ETS1,ARNT,BRAF,HIF1A,PTPN11,CRK,RAP1B,NRAS,MET,MAPK3,MAPK1,TFE3,KRAS,SOS1,PIK3CA,RAP1A,VHL,VEGFA,EP300,ENSCHIG00000013977,GAB1,EGLN2,ENSCHIG00000015779,ENSCHIG00000015968,JUN,PAK2,ENSCHIG00000025708,RAPGEF1,TGFB2,CRKL,EGLN3,SOS2,PAK6,MAP2K2
KEGG	Transcriptional misregulation in cancer	KEGG:05202	0.00542127	2.2659	185	2272	82	7447	CD86,IGF1,KLF3,ENSCHIG00000018361,MITF,PBX1,SP1,DUSP6,BMP2K,AFF1,NR4A3,PAX7,TGFBR2,MET,MEIS1,PLAU,PDGFA,FLI1,GRIA3,TFE3,PAX8,CDK9,DDX5,CCNT1,BCL6,MLF1,GADD45A,ENSCHIG00000019939,CXCL8,CDK14,ELK4,JMJD1C,PROM1,NSD2,TCF3,MLLT3,PBX3,FOXO1,ZEB1,CEBPB,RUNX1T1,EYA1,ZBTB16,BIRC3,CEBPA,ENSCHIG00000025136,ENSCHIG00000024173,MAF,IGF1R,ITGAM,PLAT,RUNX2,GADD45B,TMPRSS2,ATF1,ETV6,MEF2C,SIX4,ENSCHIG00000016716,…
KEGG	EGFR tyrosine kinase inhibitor resistance	KEGG:01521	0.00572876	2.24194	76	2272	40	7447	IGF1,PDGFC,PIK3R1,ENSCHIG00000006638,HGF,BRAF,ENSCHIG00000018293,NRAS,MET,AXL,PDGFA,MAPK3,MAPK1,KRAS,EIF4E,SOS1,EGFR,PIK3CA,PDGFRA,KDR,SHC4,PRKCB,VEGFA,SRC,GAB1,RPS6KB1,NF1,ENSCHIG00000024173,IGF1R,EIF4E2,ENSCHIG00000015779,PLCG2,PDGFRB,SOS2,BCL2L11,NRG1,PLCG1,MAP2K2,MTOR,FGFR2
KEGG	AMPK signaling pathway	KEGG:04152	0.00590474	2.2288	119	2272	57	7447	CD36,ADIPOQ,IGF1,PPP2R5E,PIK3R1,CFTR,EEF2K,PRKAG2,RAB14,ENSCHIG00000018293,RAB2A,FBP2,CAB39L,STRADA,PPP2R2C,CPT1A,PPP2R3B,PPP2R1B,PIK3CA,CREB1,ENSCHIG00000013910,RAB10,PRKAB2,PRKAA2,HMGCR,FOXO1,RPS6KB1,PPP2R5C,G6PC2,CREB5,HNF4A,ENSCHIG00000008011,LEP,PPP2CA,ENSCHIG00000012302,IGF1R,INSR,G6PC,ENSCHIG00000015779,GYS2,PRKAG3,PDPK1,PPARGC1A,ELAVL1,CAB39,CAMKK2,MLYCD,LIPE,RPTOR,CCND1,ENSCHIG0000001380…
KEGG	PI3K-Akt signaling pathway	KEGG:04151	0.00830331	2.08075	338	2272	136	7447	KITLG,IGF1,GNG2,FGF7,PPP2R5E,PDGFC,PIK3R1,MAGI1,ENSCHIG00000006638,HGF,PRLR,IKBKB,IFNAR1,GNB4,ATF4,ENSCHIG00000008290,ENSCHIG00000018293,ENSCHIG00000024417,THBS1,LPAR6,ENSCHIG00000021932,RBL2,ATF2,FN1,NRAS,MET,BDNF,CD19,IKBKG,CSF1,COL6A3,PPP2R2C,LAMC2,PDGFA,MAPK3,MAPK1,PPP2R3B,CDK6,KRAS,EIF4E,LPAR1,THBS2,SOS1,ENSCHIG00000012589,YWHAB,ENSCHIG00000020223,PPP2R1B,ENSCHIG00000017892,ITGA1,EGFR,PIK3CA…
KEGG	Mitophagy - animal	KEGG:04137	0.0109473	1.96069	63	2272	34	7447	USP15,GABARAPL1,MAPK10,ATG5,MITF,SP1,ATF4,ENSCHIG00000018293,HIF1A,RRAS2,NRAS,TBC1D15,TFE3,KRAS,RHOT1,TOMM7,CALCOCO2,MAPK9,ENSCHIG00000024818,SRC,USP30,ENSCHIG00000024173,RAB7B,PGAM5,TP53,ENSCHIG00000021542,JUN,MFN1,OPTN,RHOT2,MAPK8,ENSCHIG00000022551,RAB7A,MRAS
KEGG	Apelin signaling pathway	KEGG:04371	0.0121636	1.91494	132	2272	61	7447	GABARAPL1,GNG2,PRKAG2,GNB4,ENSCHIG00000024417,RRAS2,NRAS,SMAD4,MAPK3,MAPK1,KRAS,NOTCH3,GNAQ,SLC8A2,SPHK2,GNAI1,ENSCHIG00000007229,PRKAB2,SMAD3,PRKAA2,GNG5,ADCY5,GNAI3,EGR1,KLF2,ENSCHIG00000015660,ENSCHIG00000021423,PRKCE,RPS6KB1,GNA13,MEF2A,TGFBR1,PDE3B,PLAT,PIK3C3,GNG12,PIK3CG,NRF1,MEF2C,ENSCHIG00000021542,TFAM,PRKAG3,HDAC4,PPARGC1A,CAMK4,PRKACA,ENSCHIG00000010479,LIPE,CALM3,CCND1,MYLK,PLCB1,JAG…
KEGG	TGF-beta signaling pathway	KEGG:04350	0.0226721	1.64451	95	2272	46	7447	ENSCHIG00000018361,BMP5,SP1,RGMB,THBS1,TGFBR2,SMAD9,E2F5,BMPR1B,SMAD4,MAPK3,ENSCHIG00000021022,MAPK1,TGIF2,PPP2R1B,SMAD5,SMAD3,ENSCHIG00000002251,EP300,ZFYVE16,ENSCHIG00000015329,FBN1,LTBP1,BAMBI,INHBB,RPS6KB1,ENSCHIG00000008011,PPP2CA,TGFBR1,ENSCHIG00000012302,ID4,ACVR1B,BMPR2,ENSCHIG00000025708,NEO1,TGFB2,SMAD1,SMURF2,CDKN2B,THSD4,ACVR2B,SMAD7,SMURF1,BMP7,RBL1,GDF6
KEGG	Type II diabetes mellitus	KEGG:04930	0.0325256	1.48777	44	2272	25	7447	ADIPOQ,MAPK10,PIK3R1,IKBKB,CACNA1C,SLC2A2,PKLR,MAPK3,MAPK1,PIK3CA,SOCS2,HK1,MAPK9,PRKCE,PRKCD,CACNA1B,INSR,ENSCHIG00000015779,CACNA1E,SOCS3,CACNA1D,MAPK8,SOCS4,MTOR,CACNA1A
KEGG	ErbB signaling pathway	KEGG:04012	0.035036	1.45549	81	2272	40	7447	MAPK10,PIK3R1,BRAF,CBL,CRK,NRAS,MAPK3,MAPK1,KRAS,SOS1,EGFR,PIK3CA,SHC4,PRKCB,CBLB,NCK1,MAPK9,SRC,GAB1,RPS6KB1,MAP2K4,ENSCHIG00000015779,CAMK2A,CAMK2G,JUN,PAK2,HBEGF,PTK2,CRKL,PLCG2,AREG,SOS2,PAK6,MAPK8,NRG1,BTC,NCK2,PLCG1,MAP2K2,MTOR
KEGG	Chronic myeloid leukemia	KEGG:05220	0.0358818	1.44513	76	2272	38	7447	PIK3R1,IKBKB,BRAF,CBL,PTPN11,CRK,NFKBIA,TGFBR2,NRAS,IKBKG,SMAD4,MAPK3,ENSCHIG00000020240,MAPK1,CDK6,KRAS,SOS1,PIK3CA,GADD45A,ENSCHIG00000019939,SHC4,SMAD3,CHUK,RB1,TGFBR1,ENSCHIG00000024173,GADD45B,MECOM,ENSCHIG00000015779,TP53,TGFB2,CRKL,E2F3,CCND1,SOS2,BAK1,GAB2,MAP2K2
KEGG	Bacterial invasion of epithelial cells	KEGG:05100	0.0362866	1.44025	71	2272	36	7447	PIK3R1,ENSCHIG00000023712,CD2AP,CBL,ACTG1,CRK,FN1,MET,CLTC,CAV2,ELMO1,CTNNA1,PIK3CA,SHC4,SEPTIN12,ENSCHIG00000013977,ITGB1,SRC,DNM3,GAB1,CTNNB1,ENSCHIG00000017166,ENSCHIG00000016030,ENSCHIG00000024732,CTNNA3,SEPTIN11,ENSCHIG00000015779,VCL,ACTB,PTK2,CRKL,SEPTIN9,WASL,CAV1,ITGA5,ENSCHIG00000016257
KEGG	Proteoglycans in cancer	KEGG:05205	0.0381925	1.41802	194	2272	82	7447	IGF1,PIK3R1,HGF,ANK3,BRAF,PPP1R12A,TIAM1,WNT5B,HIF1A,THBS1,RRAS2,CBL,PTPN11,ACTG1,FN1,NRAS,MET,PLAU,CAV2,MAPK3,MAPK1,FRS2,TIMP3,KRAS,SOS1,SDC2,IHH,ENSCHIG00000017892,DDX5,EGFR,PIK3CA,ENSCHIG00000019939,KDR,ARHGEF12,PRKCB,VEGFA,FAS,FZD3,PTCH1,ENSCHIG00000013977,PPP1CB,ITGB1,SRC,RDX,FZD5,GAB1,RPS6KB1,CTNNB1,MAPK13,FGFR1,IGF1R,IQGAP1,ENSCHIG00000015779,CAMK2A,TP53,ACTB,PDPK1,TFAP4,CASP3,CAMK2G,FZD1,…
KEGG	Hippo signaling pathway	KEGG:04390	0.0382269	1.41763	150	2272	66	7447	LEF1,ENSCHIG00000018361,PARD3,BMP5,APC,TEAD1,WNT5B,YAP1,ACTG1,TGFBR2,DLG1,MOB1A,SNAI2,BMPR1B,PPP2R2C,SMAD4,TCF7L2,ENSCHIG00000021022,CTNNA1,AJUBA,TCF7L1,ENSCHIG00000012589,YWHAB,STK3,ENSCHIG00000020223,PPP2R1B,RASSF6,FRMD6,CRB1,SMAD3,FZD3,LATS1,PPP1CB,BIRC3,FZD5,FBXW11,CTNNB1,ENSCHIG00000025136,ENSCHIG00000008011,PPP2CA,TGFBR1,ENSCHIG00000012302,CTNNA3,DVL3,TP73,BMPR2,ACTB,YWHAG,FZD1,ENSCHIG00000…
KEGG	Focal adhesion	KEGG:04510	0.0407967	1.38938	186	2272	79	7447	IGF1,MAPK10,PDGFC,PIK3R1,ENSCHIG00000006638,HGF,MYL12B,BRAF,PPP1R12A,FYN,TLN2,THBS1,ARHGAP35,ACTG1,CRK,ARHGAP5,RAP1B,FN1,MET,COL6A3,CAV2,LAMC2,PDGFA,MAPK3,MAPK1,THBS2,SOS1,PARVA,VASP,ENSCHIG00000017892,ITGA1,EGFR,PIK3CA,ITGB6,PDGFRA,KDR,SHC4,RAP1A,LAMC1,PRKCB,VEGFA,VEGFC,MAPK9,ENSCHIG00000013977,PPP1CB,ITGB1,SRC,BIRC3,CTNNB1,ENSCHIG00000025136,IGF1R,ITGA3,TNN,ENSCHIG00000015779,ITGB8,RAC2,VCL,ACT…
KEGG	Oxytocin signaling pathway	KEGG:04921	0.0422338	1.37434	145	2272	64	7447	ENSCHIG00000003874,CACNB2,EEF2K,PRKAG2,CACNA2D1,PPP1R12A,CACNA1C,NFATC3,ACTG1,NRAS,KCNJ2,MAPK3,MAPK1,KRAS,GNAQ,PLA2G4E,CAMK1D,CACNG5,EGFR,KCNJ3,ENSCHIG00000013367,GNAI1,ENSCHIG00000013910,CACNG3,PRKAB2,PRKCB,PRKAA2,ADCY5,GNAI3,NPR1,PPP3CC,ENSCHIG00000021423,PPP1CB,RCAN1,SRC,PTGS2,GNAO1,PIK3CG,CAMK2A,MEF2C,PRKAG3,ACTB,PPP3CB,CAMK2G,JUN,PPP3CA,CAMK4,PRKACA,CAMKK2,CALM3,KCNJ14,CACNA1D,OXTR,CCND1,MYL…
KEGG	Pancreatic cancer	KEGG:05212	0.0429899	1.36663	74	2272	37	7447	MAPK10,PIK3R1,IKBKB,BRAF,TGFBR2,IKBKG,PLD1,SMAD4,MAPK3,MAPK1,CDK6,KRAS,EGFR,PIK3CA,GADD45A,CASP9,SMAD3,VEGFA,CHUK,MAPK9,ENSCHIG00000013977,RB1,RPS6KB1,TGFBR1,ENSCHIG00000024173,GADD45B,ENSCHIG00000015779,RAC2,TP53,BRCA2,TGFB2,E2F3,CCND1,RALA,MAPK8,BAK1,MTOR
KEGG	Leukocyte transendothelial migration	KEGG:04670	0.0433506	1.36301	105	2272	49	7447	CLDN1,CLDN18,RAPGEF4,CXCR4,PIK3R1,CLDN16,MYL12B,PTPN11,ARHGAP35,ACTG1,ARHGAP5,RAP1B,NCF2,CTNNA1,CLDN20,VASP,CLDN17,PIK3CA,GNAI1,PECAM1,ITGAL,RAP1A,PRKCB,GNAI3,ENSCHIG00000013977,ITGB1,CTNNB1,NCF4,ICAM1,PTK2B,MAPK13,CDH5,ITGAM,CTNNA3,ENSCHIG00000009839,ENSCHIG00000015779,RAC2,VCL,ENSCHIG00000021886,CLDN10,ACTB,CLDN6,PTK2,PLCG2,ENSCHIG00000011095,ROCK2,RHOH,ITK,PLCG1
